# Supplementary material for: Cell-Type-Specific Predictive Network Yields Novel Insights into Mouse Embryonic Stem Cell Self-Renewal and Cell Fate
Source: PLoS One. 2013 Feb 28;8(2):e56810. doi: 10.1371/journal.pone.0056810 (PMC3585227; doi:10.1371/journal.pone.0056810)
Supplement: Table S8 — Data Compendium Tests. (XLSX) [file pone.0056810.s013.xlsx]

## Sheet: mESC Gene Exp.
Table S13. Data Compendium Tests
Notes: This table is a reference for the data compendium tests conducted using mouse gene expression data. The mESC Gene Exp. tab lists the mESC gene expression datasets included in the test compendium for that network. It also lists the top ranked edges (those with a posterior edge weight ≥ 0.9999) as well as genes involved in those top edges and only in edges with a posterior of 1. It provides …
Data Compendium		Top Ranked Edges (≥ 0.9999)					Genes Involved in Top Ranked Edges			GO BP|KEGG Pathway Enrichment Annotations from the Database for Annotation, Visualization and Integrated Discovery (DAVID), version 6.7
Dataset ID		Gene1	Gene2	Posterior	Rank		≥ 0.9999	1		Term	Fold Enrichment	PValue	Genes	Count	%	Bonferroni	Benjamini	FDR
GDS1014		Pola1	Helb	1	1		Plekhg2	Plekhg2		GO:0006270~DNA replication initiation	29.9735	7.06275e-07	CCNE1, MCM7, POLA1, MCM2, MCM4, MCM5	6	1.75439	0.0011675	0.000583919	0.00118737
GDS1015		Pola1	Sap30	1	1		Psma7	Foxa2		GO:0006303~double-strand break repair via nonhomologous end joining	18.7335	0.0102501	XRCC5, XRCC6, POLA1	3	0.877193	1	0.254584	15.904
GDS1593		Pola1	Slc7a3	1	1		Tspan2	Klf6		GO:0000726~non-recombinational repair	18.7335	0.0102501	XRCC5, XRCC6, POLA1	3	0.877193	1	0.254584	15.904
GDS1653		Pola1	Hells	1	1		Nmt1	Gpx3		GO:0045599~negative regulation of fat cell differentiation	16.652	0.0130065	WWTR1, SIRT1, SOD2	3	0.877193	1	0.294787	19.7558
GDS1824		Prdx1	Ran	1	1		Tspan9	Dap		GO:0006268~DNA unwinding during replication	13.6243	0.0193562	MCM7, MCM2, MCM4	3	0.877193	1	0.374083	28.007
GDS2187		Etv4	Nr0b1	1	1		2010011I20Rik	Klf2		GO:0006261~DNA-dependent DNA replication	13.2236	2.61489e-07	PRIM1, CCNE1, MCM7, HELB, POLA1, TIPIN, MCM2, MCM4, MCM5	9	2.63158	0.000432409	0.000432409	0.000439607
GDS2276		Zfp42	Sap30	1	1		Syt9	Cacybp		GO:0032508~DNA duplex unwinding	12.489	0.0229254	MCM7, MCM2, MCM4	3	0.877193	1	0.404514	32.2877
GDS2294		Zfp42	8430410A17Rik	1	1		Gpx3	Wbp5		GO:0060706~cell differentiation involved in embryonic placenta development	12.489	0.0229254	KRT19, KRT8, GJB5	3	0.877193	1	0.404514	32.2877
GDS2666		Zfp42	Dnmt3l	1	1		Cacybp	Trap1a		GO:0010332~response to gamma radiation	11.7543	0.0043367	TRP53, PML, CHEK2, SOD2	4	1.16959	0.999245	0.157309	7.04606
GDS2667		Zfp42	Uba2	1	1		Bcl3	Snx9		GO:0019827~stem cell maintenance	11.3536	0.000852631	POU5F1, SOX2, BMPR1A, FGF4, TCL1	5	1.46199	0.756065	0.0753877	1.4238
GDS2668		Zfp42	Fbxo15	1	1		Sh3gl2	Gnb2l1		GO:0048863~stem cell differentiation	11.2804	2.8824e-05	XRCC5, POU5F1, SOX2, ETV4, BMPR1A, FGF4, TCL1	7	2.04678	0.046557	0.00678767	0.0484472
GDS2669		Zfp42	Nr0b1	1	1		1300014I06Rik	Syce2		GO:0048864~stem cell development	10.86	0.00101609	POU5F1, SOX2, BMPR1A, FGF4, TCL1	5	1.46199	0.813898	0.0806358	1.69456
GDS2671		Zfp42	Msh6	1	1		Akt1	2700097O09Rik		mmu03030:DNA replication	10.4091	7.96896e-06	RFC5, RPA1, PRIM1, MCM7, POLA1, MCM2, MCM4, MCM5	8	2.33918	0.000979705	0.000979705	0.00918832
GDS2672		Zfp42	Slc7a3	1	1		Akt3	Col1a1		GO:0042542~response to hydrogen peroxide	8.32598	0.0116493	GPX3, COL1A1, PRDX1, SOD2	4	1.16959	1	0.279991	17.8805
GDS2905		Zfp42	Trim28	1	1		Uqcrh	Fgf4		GO:0006302~double-strand break repair	6.97059	0.0015753	XRCC5, RPA1, TRP53, XRCC6, POLA1, SOD2	6	1.75439	0.926289	0.0920607	2.61563
GDS2906		Zfp42	Hells	1	1		Myadm	Rest		GO:0032526~response to retinoic acid	6.89047	0.0195535	POU5F1, SOX2, MEST, LEFTY1	4	1.16959	1	0.372869	28.2502
GDS434		Zfp42	Pou5f1	1	1		Hsd11b2	Msrb2		GO:0000077~DNA damage checkpoint	6.66078	0.021413	TRP53, PML, TIPIN, CHEK1	4	1.16959	1	0.38764	30.5039
GSE11523a		Kdm3a	8430410A17Rik	1	1		Cebpb	Ptpra		GO:0033189~response to vitamin A	6.66078	0.021413	POU5F1, SOX2, MEST, LEFTY1	4	1.16959	1	0.38764	30.5039
GSE11660		Trp53	Rrn3	1	1		Unc5b	Mad2l1		GO:0045765~regulation of angiogenesis	6.66078	0.00193579	COL4A2, ID1, SERPINE1, PML, RHOB, THBS1	6	1.75439	0.959437	0.104626	3.20507
GSE12753		Trp53	Pou5f1	1	1		Fubp3	Zswim1		GO:0033273~response to vitamin	6.24449	0.0254121	POU5F1, SOX2, MEST, LEFTY1	4	1.16959	1	0.408809	35.1273
GSE13127		Trap1a	Fbxo15	1	1		Mettl5	Xrcc5		GO:0001704~formation of primary germ layer	6.24449	0.00804743	FOXA2, POU5F1, ECSIT, EPHA2, BMPR1A	5	1.46199	0.999998	0.215719	12.7017
GSE13805		Tpm1	Tagln	1	1		Nid2	Wdr74		GO:0007369~gastrulation	6.07572	0.000108963	TRP53, FOXA2, POU5F1, TDGF1, UGDH, ECSIT, EPHA2, BMPR1A, LEFTY1	9	2.63158	0.164926	0.0162515	0.183028
GSE15173		Tpm1	Cnn2	1	1		Apoc2	Wdr77		GO:0000075~cell cycle checkpoint	5.76414	0.00367811	TRP53, MAD2L1, PML, TIPIN, BIRC5, CHEK1	6	1.75439	0.997745	0.151873	6.00695
GSE15487		Timp3	Anxa5	1	1		Sf3a3	Xrcc6		GO:0042254~ribosome biogenesis	5.35242	1.43301e-05	DIS3, SDAD1, RRN3, EMG1, NIP7, EXOSC5, EXOSC2, NOP58, RRS1, BOP1, RRP9, FTSJ3	12	3.50877	0.0234235	0.00472922	0.0240887
GSE15998		Thbs1	Anxa3	1	1		Pitpnb	Wls		GO:0042770~DNA damage response, signal transduction	5.25851	0.00546778	TRP53, MSH6, PML, TIPIN, CHEK1, CHEK2	6	1.75439	0.999885	0.175475	8.80545
GSE18503		Thbs1	Tagln	1	1		Aven	Flii		GO:0010212~response to ionizing radiation	5.20374	0.0151434	TRP53, XRCC6, PML, CHEK2, SOD2	5	1.46199	1	0.321784	22.6271
GSE18840		Tdgf1	Slc7a3	1	1		Rbm8a	Abca3		GO:0051325~interphase	4.89764	0.0185721	APP, KRT7, POLA1, BIRC5, CHEK1	5	1.46199	1	0.366177	27.0331
GSE19542		Tdgf1	Upp1	1	1		Tmed3	Slc7a7		GO:0010638~positive regulation of organelle organization	4.80345	0.0198132	TRP53, ARPC2, RAC1, PML, RANBP1	5	1.46199	1	0.368542	28.569
GSE2042		Tdgf1	Hells	1	1		Mad2l1	Slc7a3		GO:0006364~rRNA processing	4.72556	0.00354989	DIS3, EMG1, EXOSC5, EXOSC2, BOP1, RRP9, FTSJ3	7	2.04678	0.997211	0.154693	5.80339
GSE2972b		Tdgf1	Coil	1	1		Snrpd3	Amfr		GO:0016072~rRNA metabolic process	4.66255	0.00379551	DIS3, EMG1, EXOSC5, EXOSC2, BOP1, RRP9, FTSJ3	7	2.04678	0.998145	0.152546	6.19298
GSE3223a		Tdgf1	Phc1	1	1		Btg2	Rbms1		GO:0006260~DNA replication	4.6012	1.09969e-05	POLA1, TIPIN, MCM2, MCM4, MCM5, RFC5, PRIM1, RPA1, CCNE1, MCM7, HELB, KRT7, TBRG1, RBMS1	14	4.09357	0.0180246	0.00453692	0.0184861
GSE3223b		Tdgf1	Pou5f1	1	1		Snrpd1	Cald1		GO:0006606~protein import into nucleus	4.46035	0.0252824	TRP53, CSE1L, RAN, PML, NOP58	5	1.46199	1	0.414996	34.982
GSE3231a		Tcn2	Clic1	1	1		Ptpn9	Lrp10		GO:0022613~ribonucleoprotein complex biogenesis	4.3757	9.3214e-05	DIS3, SDAD1, RRN3, EMG1, NIP7, EXOSC5, EXOSC2, NOP58, RRS1, BOP1, RRP9, FTSJ3	12	3.50877	0.142885	0.0153001	0.156593
GSE3509		Tcn2	Itm2c	1	1		Zswim1	Dpy30		mmu04115:p53 signaling pathway	3.95997	0.0167587	TRP53, CCNE1, SERPINE1, CHEK1, CHEK2, THBS1	6	1.75439	0.874919	0.34016	17.7063
GSE3527		Tcn2	Kdelr1	1	1		Mmd	Bccip		GO:0007584~response to nutrient	3.94389	0.0178073	POU5F1, SOX2, COL1A1, CLIC1, MEST, LEFTY1	6	1.75439	1	0.362552	26.0713
GSE3528		Tcn2	Ctsz	1	1		Frrs1	P2rx4		GO:0031667~response to nutrient levels	3.90959	0.00212247	TRP53, POU5F1, SOX2, CTSD, COL1A1, CLIC1, SIRT1, MEST, LEFTY1	9	2.63158	0.970231	0.110542	3.50899
GSE3653		Tcn2	Gabarap	1	1		Adcy6	Rap2c		GO:0007178~transmembrane receptor protein serine/threonine kinase signaling pathway	3.84276	0.0197118	TRP53, ID1, LTBP4, PML, ECSIT, BMPR1A	6	1.75439	1	0.371102	28.4446
GSE3749a		Tcn2	Stx7	1	1		Ppap2b	Pmp22		GO:0009991~response to extracellular stimulus	3.75608	0.00138192	TRP53, PPAN, POU5F1, SOX2, CTSD, COL1A1, CLIC1, SIRT1, MEST, LEFTY1	10	2.92398	0.898457	0.0842136	2.29804
GSE3774a		Tcn2	P2rx4	1	1		Wls	Morc1		GO:0017038~protein import	3.65531	0.0239105	TRP53, CSE1L, RAN, TIMM10, PML, NOP58	6	1.75439	1	0.413576	33.4263
GSE3774b		Tcn2	Vamp8	1	1		Cpd	Mrpl15		GO:0051169~nuclear transport	3.56828	0.0136072	TRP53, ADAM10, CSE1L, RAN, TBRG1, PML, NOP58	7	2.04678	1	0.298179	20.573
GSE4077		Tcn2	Cyba	1	1		Ppp1r8	Ruvbl2		GO:0034470~ncRNA processing	3.47794	0.00126684	DIS3, RPP25, ELAC2, EMG1, EXOSC5, EXOSC2, TRMT1, BOP1, RRP9, NSUN2, FTSJ3	11	3.21637	0.877136	0.0871283	2.10858
GSE4082		Tcn2	Calu	1	1		Flii	Mrpl18		GO:0001701~in utero embryonic development	3.36781	2.60219e-05	TRP53, CCNB1IP1, ADAM10, GABPA, GJB5, CAPN2, CSDA, TPM1, CITED1, RPA1, KRT19, RRN3, POU5F1, KRT8, TDGF1, DNMT3L, PDGFRA, BMPR1A	18	5.26316	0.0421276	0.00714779	0.0437383
GSE4189		Tcn2	Anxa5	1	1		Pole2	B2m		GO:0045596~negative regulation of cell differentiation	3.29379	0.00107048	TRP53, FOXA2, POU5F1, SOX2, REST, WWTR1, NR0B1, SIRT1, BMPR1A, SOD2, FGF4, TCL1	12	3.50877	0.829926	0.080898	1.78451
GSE4309		Tcn2	Ltbr	1	1		Obsl1	Pla2g1b		mmu04110:Cell cycle	3.20201	0.00653221	TRP53, CCNE1, MAD2L1, MCM7, CHEK1, MCM2, CHEK2, MCM4, MCM5	9	2.63158	0.553402	0.235627	7.27829
GSE5583		Spp1	Fbxo15	1	1		Zfp622	Plcg2		GO:0032774~RNA biosynthetic process	3.1718	0.013135	POLR2H, PRIM1, TRP53, RRN3, TCEA3, POU5F1, HELB, TCOF1	8	2.33918	1	0.293287	19.9313
GSE5671		Spp1	Nr0b1	1	1		Rab12	Ncl		mmu04670:Leukocyte transendothelial migration	3.06149	0.0147031	CLDN7, ICAM1, CYBA, CLDN6, PLCG2, RAC1, ACTN1, JAM2	8	2.33918	0.838284	0.365855	15.7006
GSE5895		Sparc	Itm2b	1	1		Slc7a7	Ifrd2		GO:0051726~regulation of cell cycle	3.0347	0.00123739	TRP53, TIPIN, PML, BCCIP, CHEK1, BIRC5, BOP1, CCNE1, APP, MAD2L1, JUN, RHOB, RANBP1	13	3.80117	0.870996	0.0888858	2.06004
GSE5914		Sox2	Zfp42	1	1		Slc7a5	Gabpa
GSE614		Sox2	Dppa4	1	1		Gng10	Gsn
GSE7141		Sox2	Helb	1	1		Slc7a3	Sept8
GSE7506a		Sox2	Sap30	1	1		Gng12	Mcl1
GSE7506b		Sox2	Msh6	1	1		Sall4	E130012A19Rik
GSE7866		Sox2	Gsta4	1	1		Amfr	Phldb2
GSE8128		Sox2	Cacybp	1	1		Stx12	Gnb2
GSE8503		Sox2	Hells	1	1		Sall1	Serpine1
GSE8574		Sox2	Mtf2	1	1		Ccrn4l	Gbx2
GSE9563		Sox2	Coil	1	1		Cyp26a1	F3
GSE9978		Sox2	Phc1	1	1		P2rx4	Timp3
		Sox2	Pou5f1	1	1		Rap2c	Sdad1
		Sod2	Zfp42	1	1		Mrpl12	Fbxo15
		Sod2	Trim2	1	1		Pdxk	Akap12
		Sod2	Lap3	1	1		Mrpl15	Ccnb1ip1
		Sod2	Nr0b1	1	1		Mrpl16	Mcfd2
		Smpd1	Clic1	1	1		Mrpl18	Slc35f5
		Smpd1	Maged2	1	1		Reep5	Rfc5
		Smpd1	Itm2c	1	1		Psmd7	Jarid2
		Smpd1	Tmx1	1	1		B2m	Apex1
		Smpd1	Wwtr1	1	1		Ier2	Icam1
		Smpd1	Tmem66	1	1		Ier3	Samm50
		Smpd1	Snx9	1	1		Agpat5	Soat1
		Smpd1	Gabarap	1	1		Ncl	Tcof1
		Smpd1	Elovl1	1	1		Ifrd2	Tpm1
		Smpd1	Abca3	1	1		Gabpa	Tcn2
		Smpd1	Amfr	1	1		Agpat9	Sparc
		Smpd1	Sdcbp	1	1		Prpf19	Sgce
		Smpd1	Vamp8	1	1		Mcl1	Zcchc10
		Smpd1	Sgce	1	1		Adssl1	Lpp
		Smpd1	Cyba	1	1		Trap1a	Ddx20
		Smpd1	Ilk	1	1		Serpinb6a	Crlf3
		Smpd1	Rnf103	1	1		Mcfd2	Birc5
		Smpd1	Mapkapk2	1	1		Slc27a2	Tcea3
		Smpd1	Rhob	1	1		Rfc5	Stx7
		Smpd1	Sqstm1	1	1		Rfc4	Slc29a1
		Smpd1	Anxa5	1	1		Usp28	Znrd1
		Rras	Cyba	1	1		Jarid2	Jam2
		Rbp1	Ngfrap1	1	1		Apex1	Nup107
		Rbp1	Rhob	1	1		Snx6	Myadm
		Rac1	Rhob	1	1		Soat1	Dnmt3l
		Ppa1	Nip7	1	1		Tcof1	Sdcbp
		Ptpra	Smpd1	1	1		Cd55	Mki67ip
		Prim1	Tipin	1	1		Trim37	Tuba4a
		Pmp22	Wls	1	1		Klhl7	Mapkapk2
		Pmp22	Anxa3	1	1		Emp2	Anxa1
		Pmp22	Mapkapk2	1	1		Emp3	Anxa3
		Pmp22	Rhob	1	1		Emp1	Anxa2
		Pmp22	Anxa5	1	1		Ilvbl	Anxa5
		Plcg2	Phc1	1	1		Lefty2	Irf6
		Serpine1	Anxa3	1	1		Lefty1	Spp1
		Pdgfra	Sox17	1	1		Acta1	Emg1
		Nucb1	Itm2b	1	1		Cox6c	Atf1
		Nefh	Tcf15	1	1		Gpsm1	Atox1
		Ndn	Maged1	1	1		Hspd1	Plekhh1
		Ncl	Sox2	1	1		Slc29a1	Thbs1
		Ncl	Csda	1	1		Neu1	Exosc2
		Ncl	Nop58	1	1		Ifitm3	Cmtm3
		Ncl	Sap30	1	1		Znrd1	Polr2h
		Ncl	Tipin	1	1		Rif1	Polr2j
		Ncl	Xpot	1	1		Jam2	Ran
		Ncl	Rpa1	1	1		Nup107	Gart
		Ncl	Rsl1d1	1	1		Usp1	Ltbr
		Ncl	Ftsj3	1	1		Usp3	1810031K17Rik
		Ncl	Uba2	1	1		Usp7	Wisp1
		Ncl	Gnl3	1	1		Top2a	Rpl39l
		Ncl	Cacybp	1	1		BC017643	Syap1
		Ncl	Trim28	1	1		Irf1	Rrn3
		Ncl	Mcm4	1	1		Bms1	Uba2
		Ncl	Pou5f1	1	1		Nme1	Rpl7l1
		Mt1	Mt2	1	1		Hat1	Lass2
		Mest	Ndn	1	1		1700019E19Rik	Tcf15
		Slc3a2	Eif4ebp1	1	1		Rhbdf1	Tdgf1
		Mcf2	Phc1	1	1		Clk3	Ghr
		Anxa1	Serpine1	1	1		Bcas2	Acot9
		Anxa1	Anxa3	1	1		AA408296	Gstm5
		Lgals1	Anxa1	1	1		Plekhh1	Trmt1
		Lgals1	Anxa5	1	1		Rfk	Lefty1
		Krt19	Anxa3	1	1		Setx	Sirt1
		Krt19	Anxa5	1	1		Ing3	C79407
		Krt18	Krt8	1	1		Ddit4	Cct3
		Krt18	Krt19	1	1		2310037I24Rik	App
		Krt18	Wls	1	1		Gtf2h3	Sox17
		Krt18	Ilk	1	1		Gtf2h1	Pou5f1
		Krt18	Phlda1	1	1		Gtf2h4	Adsl
		Krt18	Anxa5	1	1		Farsb	Ifitm3
		Jun	Pmp22	1	1		Farsa	Tmem66
		Jun	Krt18	1	1		Rap1gds1	Ifitm1
		Jun	Clic1	1	1		Cst3	Elac2
		Jun	Lrp10	1	1		Abhd4	Jun
		Jun	Wwtr1	1	1		Abhd5	Gabarap
		Jun	Wls	1	1		Wdr3	Clic1
		Jun	Bag2	1	1		Snrk	Arpc2
		Jun	Rbms1	1	1		Magohb	Mest
		Jun	Sh3glb1	1	1		Uba2	Rrp12
		Jun	Abca3	1	1		Pcolce	Aoah
		Jun	Klf6	1	1		Pwp2	Wwtr1
		Jun	Sgce	1	1		Flnb	Vamp8
		Jun	Tagln2	1	1		Lass2	Itm2c
		Jun	Ilk	1	1		Ercc6l	Itm2b
		Jun	Mapkapk2	1	1		Prpf31	Nip7
		Jun	Rhob	1	1		Fgb	Pcolce2
		Jun	Peg3	1	1		Tgm2	Guk1
		Id1	Id3	1	1		Mcm3ap	Ppm1g
		Icam1	Spp1	1	1		Apoc1	Ppan
		Ranbp1	Eef1d	1	1		Gstm5	Calu
		H2-Ke2	Timm10	1	1		Pou3f1	Mcm7
		H2-Ke2	Birc5	1	1		Cct3	Mcm5
		Gsn	Anxa5	1	1		Pno1	Mcm4
		Gnb2	Itm2c	1	1		Cct7	Krt7
		Gnb2	Flii	1	1		Cct4	Mcm2
		Gnb2	Ilk	1	1		Samm50	Krt8
		Slc2a3	Cldn6	1	1		Dtymk	Cnn2
		Gjb3	Gjb5	1	1		Lamp2	Ugdh
		Ghr	Anxa5	1	1		Prom1	Adam10
		Gdf3	Zfp42	1	1		Tmem66	Pttg1ip
		Gdf3	Trp53	1	1		Fez2	Bmpr1a
		Gdf3	Trap1a	1	1		Nodal	Dhx16
		Gdf3	Tdgf1	1	1		Pold2	Ppa1
		Gdf3	Sox2	1	1		Dut	8430410A17Rik
		Gdf3	Sod2	1	1		Tcfcp2l1	Ddx39
		Gdf3	H2-Ke2	1	1		Hdac1	Gjb3
		Gdf3	Dppa4	1	1		Serpinb9b	Gjb5
		Gdf3	Helb	1	1		Litaf	Rras
		Gdf3	Sdad1	1	1		Mest	Phc1
		Gdf3	Noc3l	1	1		Rrp12	Phc2
		Gdf3	Sap30	1	1		Vamp3	Peg3
		Gdf3	Dnajc7	1	1		Aoah	Ngfrap1
		Gdf3	Zfp296	1	1		Clns1a	Rhox6
		Gdf3	Dnajc21	1	1		Rarg	Rrs1
		Gdf3	Rrn3	1	1		Syncrip	Rhox9
		Gdf3	Pcolce2	1	1		Vamp8	Nsun2
		Gdf3	Xpot	1	1		Upf3b	Nefh
		Gdf3	Dhx16	1	1		Usp10	Prim1
		Gdf3	Rpa1	1	1		Usp15	Tars
		Gdf3	8430410A17Rik	1	1		Sar1b	Chek2
		Gdf3	Trim13	1	1		Set	Chek1
		Gdf3	Ifitm3	1	1		Prpsap1	Nup37
		Gdf3	Mkrn1	1	1		Rrp1b	Rhob
		Gdf3	Dnmt3l	1	1		Psme4	Mybl2
		Gdf3	Fbxo15	1	1		Psme3	Slc2a3
		Gdf3	Gnl3	1	1		Ndufb10	F2r
		Gdf3	Nr0b1	1	1		Fam185a	Msh6
		Gdf3	Nubp2	1	1		Mtf2	Sox2
		Gdf3	Ash2l	1	1		Isyna1	Gnl3
		Gdf3	Msh6	1	1		H2afx	Upp1
		Gdf3	Klf2	1	1		H2afz	Dppa3
		Gdf3	Slc7a7	1	1		Mcm7	Zfp42
		Gdf3	Rasgrp2	1	1		Mcm6	Dppa4
		Gdf3	Ltbp4	1	1		Mcm5	Helb
		Gdf3	Gsta4	1	1		Mcm4	Krt19
		Gdf3	Tcea3	1	1		Mcm3	Krt18
		Gdf3	Zcchc10	1	1		Mcm2	Actn1
		Gdf3	Slc7a3	1	1		Tnfrsf12a	Rac1
		Gdf3	Trim28	1	1		Mrps17	Eef1d
		Gdf3	Myo10	1	1		Cnn2	Lsm3
		Gdf3	Zic3	1	1		Hmga2	Lyar
		Gdf3	D19Bwg1357e	1	1		Spry1	Cse1l
		Gdf3	Hells	1	1		Spry4	Lgals1
		Gdf3	Jarid2	1	1		Tmem30a	Kdm3a
		Gdf3	Tcf15	1	1		Lxn	Tdh
		Gdf3	Pml	1	1		Ciz1	Eftud2
		Gdf3	Phc1	1	1		Fgf17	Gng3
		Gdf3	Mcm5	1	1		Fgf15	Ndn
		Gdf3	Gng3	1	1		Actl6a	Lap3
		Gdf3	Pou5f1	1	1		Thumpd1	Srm
		Gdf3	Pla2g1b	1	1		Ikbip	Rbp1
		Gbx2	Etv4	1	1		2210411K11Rik	Dis3
		Gbx2	Gdf3	1	1		Aurkb	Gfpt2
		Gbx2	Dhx16	1	1		Bmpr1a	Rasgrp2
		Gbx2	8430410A17Rik	1	1		Btg3	Sap30
		Gbx2	Nr0b1	1	1		Btg1	Nop58
		Gbp1	Gbp2	1	1		Cd44	Pipox
		Gart	Rrn3	1	1		Cd47	Mt2
		Gart	Gpn1	1	1		X99384	Mt1
		Gart	Rfc5	1	1		Tex19.1	Cryab
		Gart	Rpa1	1	1		L3mbtl3	Dnajc21
		Gart	Rnmt	1	1		L3mbtl2	Psat1
		Gart	Ftsj3	1	1		Phc1	Bop1
		Gart	Chek2	1	1		Uchl3	Eef1e1
		Gart	Gnl3	1	1		Phc2	Sqstm1
		Gart	Ruvbl2	1	1		Ocln	Trim13
		Gart	Slc7a7	1	1		Peg3	Ltbp4
		Gart	Bop1	1	1		Ncoa2	Laptm4a
		Gart	Orc1	1	1		Ncoa3	Tcl1
		Gart	Utf1	1	1		Ncoa6	Atp6ap1
		Gart	Cacybp	1	1		Chordc1	Mkrn1
		Gart	Cirh1a	1	1		Utp6	Parva
		Gart	Trim28	1	1		Hkdc1	Rrp9
		Gart	Myo10	1	1		Cyp51	Sh3glb1
		Gart	D19Bwg1357e	1	1		Nefh	BC013529
		Gart	Hells	1	1		Zfp296	Id1
		Gart	Ppm1g	1	1		Fbxl12	Pdgfra
		Gart	Phc1	1	1		Tfdp1	Il10rb
		Gart	Mcm4	1	1		Sumo3	Bcat2
		Gart	Mcm5	1	1		Nup37	Cyba
		Gart	Pou5f1	1	1		Dkk1	Elovl1
		Gabpa	Nr0b1	1	1		Ccng1	Capn2
		Gabpa	Slc7a3	1	1		Ccng2	Orc2
		Gabpa	Hells	1	1		Armc8	Orc1
		Xrcc6	Gart	1	1		Armc6	Phf5a
		Fgf4	Tcl1	1	1		Nit2	Ppid
		Eed	Zfp42	1	1		Rell1	Ash2l
		Eed	Ncl	1	1		F2r	Plin2
		Eed	Gdf3	1	1		Pygb	Trp53
		Eed	Gbx2	1	1		Bckdhb	Ilk
		Eed	Gabpa	1	1		Rnh1	Rps5
		Eed	Dppa4	1	1		Ndrg1	Cirh1a
		Eed	E130012A19Rik	1	1		Odc1	Mtf2
		Eed	Csda	1	1		Pfas	Actl6a
		Eed	Sirt1	1	1		Nmd3	Uchl5
		Eed	Sap30	1	1		BC027231	Nubp2
		Eed	Dnajc7	1	1		Tubb3	Ctsl
		Eed	Slc29a1	1	1		Tmem165	Tbrg1
		Eed	Rrn3	1	1		Gramd4	Ctsd
		Eed	Gpn1	1	1		Spc24	Ctsz
		Eed	Dhx16	1	1		Ext2	Rsl1d1
		Eed	Zmym1	1	1		Dgat2	Rnf103
		Eed	Mki67ip	1	1		Tcerg1	Coil
		Eed	Psmd12	1	1		Fam134a	Cited1
		Eed	Lap3	1	1		1500001M20Rik	Exosc5
		Eed	8430410A17Rik	1	1		Mat2b	Rpp25
		Eed	Nip7	1	1		Ap4s1	Tmx1
		Eed	Ftsj3	1	1		Qdpr	Pbxip1
		Eed	Crlf3	1	1		1110003E01Rik	Cldn6
		Eed	Fbxo15	1	1		Gemin6	Cldn7
		Eed	Nr0b1	1	1		Gemin4	D19Bwg1357e
		Eed	Ash2l	1	1		Gemin5	Zfp296
		Eed	Orc1	1	1		Sae1	Maged1
		Eed	Ltbp4	1	1		Lig1	Maged2
		Eed	Cacybp	1	1		Zfp532	Dnajc7
		Eed	Zcchc10	1	1		Phf17	Sepn1
		Eed	Trim28	1	1		Phf13	Smpd1
		Eed	Nsun2	1	1		Bgn	Gpn1
		Eed	Hells	1	1		Ptcd3	Csda
		Eed	Coil	1	1		Mospd1	Noc3l
		Eed	Jarid2	1	1		Gpd2	Trim2
		Eed	Tcf15	1	1		Csrp1	Etv4
		Eed	Pou5f1	1	1		Limd1	Adh5
		Ect2	Sox2	1	1		Mpdz	Nr0b1
		Ect2	Dppa4	1	1		Sap30	Rpa1
		Ect2	Cacybp	1	1		Nop58	H2-Ke2
		Ect2	Hells	1	1		Tcfl5	Kdelr1
		Epha2	Slc7a7	1	1		Fkbp4	Hells
		Sept8	Plekhg2	1	1		Fkbp5	Slc3a2
		Ctsl	Tmem66	1	1		Cdk4	Plod3
		Ctsl	Atp6ap1	1	1		Sarnp	Ecsit
		Ctsl	Laptm4a	1	1		Pea15a	Tagln
		Ctsd	Pttg1ip	1	1		Kank3	Dynlt3
		Ctsd	Anxa5	1	1		Adam9	Nucb1
		Col1a1	Wisp1	1	1		Psat1	Sod2
		Col4a2	Jun	1	1		Aatf	Gbp2
		Col4a2	Phldb2	1	1		Sqstm1	Gbp1
		Col4a2	Clic1	1	1		Ltbp4	Ftsj3
		Col4a2	Wls	1	1		Tcl1	Crmp1
		Col4a2	Kdelr1	1	1		Mkrn1	Phlda1
		Col4a2	Bag2	1	1		Hbegf	Efnb1
		Col4a2	Fhl2	1	1		Neurod1	Ect2
		Col4a2	Sgce	1	1		Grcc10	Gdf3
		Col4a2	Tagln2	1	1		Pdgfra	Epha2
		Col4a2	Ilk	1	1		Ttc27	Prdx1
		Col4a2	Atp6ap1	1	1		Znhit3	Col4a2
		Col4a2	Anxa5	1	1		Tshz1	Col4a1
		Col4a2	F2r	1	1		3110001D03Rik	Tagln2
		Col4a1	Col4a2	1	1		Impad1	Ranbp1
		F3	Col4a2	1	1		Cdca7	Arl4c
		Ccne1	Zfp42	1	1		Cdca5	Bag2
		Ccne1	Sox2	1	1		Kif22	Ccne1
		Ccne1	Sod2	1	1		Dppa5a	Acbd3
		Ccne1	Nefh	1	1		Cnih	Eif4ebp1
		Ccne1	Guk1	1	1		Fgfr1op	Eed
		Ccne1	Gdf3	1	1		Cd9	2310008H09Rik
		Ccne1	Gbx2	1	1		Parm1	Zmym1
		Ccne1	Gart	1	1		Rassf1	Trim28
		Ccne1	Eed	1	1		Rassf3	Tipin
		Ccne1	Tcof1	1	1		Dcbld1	Fhl2
		Ccne1	Rrp9	1	1		Zfml	Pml
		Ccne1	Ppan	1	1		Mina	Noc4l
		Ccne1	Dppa4	1	1		Smu1	Fastkd5
		Ccne1	Rrp12	1	1		Uchl5	Timm10
		Ccne1	Wdr74	1	1		Kif2c	0610031J06Rik
		Ccne1	Rpp25	1	1		Daxx	Id3
		Ccne1	Sdad1	1	1		Atic	Psmd12
		Ccne1	Fastkd5	1	1		Vopp1	Utf1
		Ccne1	Csda	1	1		Tmbim1	Xpot
		Ccne1	Nop58	1	1		Calcoco2	Gtsf1l
		Ccne1	Noc3l	1	1		Rnf103	Myo10
		Ccne1	Rrn3	1	1		Cited2	Stard10
		Ccne1	Tipin	1	1		Cited1	Mcf2
		Ccne1	Gpn1	1	1		Pef1	Psmg1
		Ccne1	Rfc5	1	1		Rars2	Acot10
		Ccne1	Dhx16	1	1		Trh	Rnmt
		Ccne1	8430410A17Rik	1	1		Cyr61	Pola1
		Ccne1	2310008H09Rik	1	1		Rcc1	Farp1
		Ccne1	Dpy30	1	1		Ttf2	Gsta4
		Ccne1	Rpl7l1	1	1		Scand1	Zic3
		Ccne1	Elac2	1	1		Mylpf	Prss8
		Ccne1	Ftsj3	1	1		Crim1
		Ccne1	Dnmt3l	1	1		Plscr3
		Ccne1	Ddx20	1	1		D19Bwg1357e
		Ccne1	Gnl3	1	1		Gng3
		Ccne1	Timm10	1	1		Rcc2
		Ccne1	Nr0b1	1	1		Sult4a1
		Ccne1	Nubp2	1	1		Plscr1
		Ccne1	Slc7a7	1	1		Aurkaip1
		Ccne1	Bop1	1	1		Atp5j
		Ccne1	Atox1	1	1		Mtfp1
		Ccne1	Orc2	1	1		Nphs1
		Ccne1	Ltbp4	1	1		Lyn
		Ccne1	Ifrd2	1	1		Atp5e
		Ccne1	Gsta4	1	1		Bcap31
		Ccne1	Bcat2	1	1		Camk2d
		Ccne1	Utf1	1	1		Nup160
		Ccne1	Zcchc10	1	1		Cox4nb
		Ccne1	Slc7a3	1	1		Rpl13
		Ccne1	Trim28	1	1		Cubn
		Ccne1	Lyar	1	1		Rpa1
		Ccne1	D19Bwg1357e	1	1		Sepn1
		Ccne1	Hells	1	1		Rpa2
		Ccne1	Coil	1	1		Lgtn
		Ccne1	Tcf15	1	1		Amotl2
		Ccne1	Phc1	1	1		Mrpl11
		Ccne1	Mcm5	1	1		Nisch
		Ccne1	Gng3	1	1		Rbpms2
		Ccne1	Srm	1	1		Slco2a1
		Ccne1	Pou5f1	1	1		Banf1
		Capn2	Sparc	1	1		Spint1
		Capn2	Krt18	1	1		Fbln2
		Capn2	Col4a2	1	1		Elf2
		Capn2	Clic1	1	1		Gsn
		Capn2	Anxa3	1	1		Spag9
		Capn2	Anxa5	1	1		Wnt4
		Cald1	Jun	1	1		Psmd5
		Cald1	Col4a2	1	1		Dtnbp1
		Cald1	Plekhg2	1	1		Smarcd1
		Cald1	Parva	1	1		Mrpl19
		Cald1	Wls	1	1		Magoh
		Cald1	Anxa5	1	1		F11r
		Anxa2	Serpine1	1	1		Cherp
		Anxa2	Lgals1	1	1		Plac1
		Anxa2	Krt19	1	1		Sod2
		Anxa2	Gsn	1	1		D030056L22Rik
		Anxa2	Cryab	1	1		Gbp1
		Anxa2	Col4a2	1	1		Ftsj3
		Anxa2	Capn2	1	1		Rock2
		Anxa2	Snx9	1	1		Sgol1
		Anxa2	Tagln2	1	1		Fbxw8
		Anxa2	Anxa3	1	1		Gpc1
		Anxa2	Cited1	1	1		Lsg1
		Anxa2	Anxa5	1	1		Lpar1
		B2m	Tcn2	1	1		Gdf3
		B2m	Smpd1	1	1		Tmprss2
		B2m	Krt7	1	1		Cenpc1
		B2m	Krt19	1	1		Cbr3
		B2m	Krt18	1	1		Thop1
		B2m	Jun	1	1		Tarbp2
		B2m	Ctsl	1	1		Col4a2
		B2m	Col4a2	1	1		Col4a1
		B2m	Col4a1	1	1		Agpat3
		B2m	Capn2	1	1		Arl4c
		B2m	Cald1	1	1		Gldc
		B2m	BC013529	1	1		Tm4sf5
		B2m	Lrp10	1	1		Acbd3
		B2m	Itm2c	1	1		Nfatc2ip
		B2m	Dap	1	1		Eed
		B2m	Wwtr1	1	1		Ahcy
		B2m	Wls	1	1		Lmna
		B2m	Tmem66	1	1		Prickle1
		B2m	Snx9	1	1		Zmym1
		B2m	Bag2	1	1		Snrpa1
		B2m	Gabarap	1	1		3110082I17Rik
		B2m	Stard10	1	1		Zfand3
		B2m	Abca3	1	1		Irx3
		B2m	Amfr	1	1		Dhx8
		B2m	Vamp8	1	1		Dhx9
		B2m	Sgce	1	1		Rab33b
		B2m	Cyba	1	1		0610031J06Rik
		B2m	Itm2b	1	1		Id4
		B2m	Ilk	1	1		Id2
		B2m	Wbp5	1	1		Id3
		B2m	Rnf103	1	1		Id1
		B2m	Il10rb	1	1		Gins1
		B2m	Laptm4a	1	1		Polr3b
		B2m	Rhob	1	1		Chaf1b
		B2m	Anxa5	1	1		Galnt2
		B2m	Soat1	1	1		Galnt3
		B2m	Efnb1	1	1		Npl
		App	Anxa5	1	1		Xpot
		Apex1	Ranbp1	1	1		Ncbp2
		Apex1	Eed	1	1		Wwc2
		Apex1	Ccne1	1	1		Shisa5
		Apex1	Polr2h	1	1		Chtf18
		Apex1	Wdr74	1	1		Rex2
		Apex1	Sap30	1	1		Stard10
		Apex1	Rrn3	1	1		Cpsf3l
		Apex1	Wdr77	1	1		Usp39
		Apex1	Rpa1	1	1		Psmg1
		Apex1	Mki67ip	1	1		Psmg2
		Apex1	Uba2	1	1		Ptch2
		Apex1	Gnl3	1	1		Xpo1
		Apex1	Eftud2	1	1		Xpo5
		Apex1	Bcat2	1	1		Xpo7
		Apex1	Trim28	1	1		Gsta4
		Apex1	Hells	1	1		E130012A19Rik
		Adh5	Rrn3	1	1		Prss23
		Adh5	Tipin	1	1		H2-Ke2
		Adh5	Rpa1	1	1		Ctbp1
		Adh5	Dpy30	1	1		Ctbp2
		Adh5	Mrpl15	1	1		Rhox6
		Adh5	Orc1	1	1		Fntb
		Adh5	Gsta4	1	1		Aqr
		Adh5	Lyar	1	1		Dap
		Adh5	Hells	1	1		Sept8
		Adh5	Mcm4	1	1		Sept4
		Adh5	Pou5f1	1	1		Sept1
		Plin2	Tcn2	1	1		Sip1
		Plin2	Smpd1	1	1		Kctd10
		Plin2	Krt19	1	1		Hmgcl
		Plin2	Krt18	1	1		Nap1l1
		Plin2	Jun	1	1		Sgce
		Plin2	Capn2	1	1		Col1a2
		Plin2	Anxa2	1	1		Col1a1
		Plin2	B2m	1	1		Fgf5
		Plin2	Wls	1	1		Fgf4
		Plin2	Gabarap	1	1		Zfp1
		Plin2	Abca3	1	1		Rnf130
		Plin2	Sgce	1	1		Ptpra
		Plin2	Cyba	1	1		Rnf138
		Plin2	Ilk	1	1		Ipo5
		Plin2	Rhob	1	1		Large
		Plin2	Sqstm1	1	1		Rpp40
		Plin2	Anxa5	1	1		2810026P18Rik
		Helb	Dppa4	1	1		Yrdc
		Wdr74	Rrp9	1	1		Grn
		Wdr74	Ppan	1	1		Rela
		Wdr74	Phf5a	1	1		1500011H22Rik
		Plekhh1	Acbd3	1	1		Psmb10
		E130012A19Rik	Ppan	1	1		Prmt2
		Plekhg2	Farp1	1	1		Prmt3
		Noc4l	Rrp12	1	1		Dhodh
		Fastkd5	Rrp12	1	1		Prmt1
		Nop58	Ppan	1	1		Prmt5
		Trim2	Jam2	1	1		Slc3a2
		Parva	Lpp	1	1		Spink3
		Parva	Clic1	1	1		5830433M19Rik
		Lrp10	Cmtm3	1	1		B230219D22Rik
		Lrp10	Clic1	1	1		Fiz1
		Sap30	Polr2h	1	1		Abca3
		Sap30	Dppa4	1	1		Rpf2
		Sap30	Helb	1	1		Spata6
		Acot9	Acot10	1	1		Frmd6
		Itm2c	Pbxip1	1	1		Aspscr1
		Itm2c	Sepn1	1	1		Ddr1
		Itm2c	Lrp10	1	1		Pus7
		Rrn3	Wdr74	1	1		Creb3l2
		Rrn3	Noc4l	1	1		Pmp22
		Rrn3	Csda	1	1		Etv5
		Rrn3	Rrs1	1	1		Etv4
		Tipin	Polr2h	1	1		Ruvbl2
		Tipin	Helb	1	1		Tcp1
		Tipin	Wdr74	1	1		Sh3bp5
		Tipin	Sap30	1	1		Serbp1
		Tipin	Rrn3	1	1		Tagln
		Gpn1	Wdr74	1	1		Dnttip1
		Slc35f5	Lrp10	1	1		Dnttip2
		Xpot	Csda	1	1		Tmem126a
		Xpot	Sap30	1	1		Eif4g2
		Xpot	Rrn3	1	1		Bicc1
		Nup37	Polr2h	1	1		Klf5
		2700097O09Rik	Tipin	1	1		Rhog
		Rfc5	Rrp9	1	1		Anln
		Rfc5	Tipin	1	1		Creb3
		Rap2c	Plekhg2	1	1		Akap12
		Dhx16	Dppa4	1	1		B4galt1
		1810031K17Rik	Itm2c	1	1		B4galt3
		Rpa1	Dppa4	1	1		Eif2s2
		Rpa1	Sap30	1	1		Tmc4
		Rpa1	Rrn3	1	1		Aars
		Rpa1	Tipin	1	1		Esx1
		Rpa1	Gpn1	1	1		Icam1
		Rpa1	Rfc5	1	1		Efhd2
		Gtsf1l	Ifitm1	1	1		Aggf1
		Wls	Phldb2	1	1		Actr3b
		Wls	Lpp	1	1		Tpm2
		Wls	Parva	1	1		Tpm1
		Wls	Itm2c	1	1		Tcn2
		Kdelr1	Itm2c	1	1		Zcchc10
		Mki67ip	Rrn3	1	1		Tmem37
		Tmem66	Itm2c	1	1		Gtpbp4
		Mrpl18	Polr2h	1	1		Gtpbp1
		Lsm3	Tipin	1	1		Ctnnal1
		Dynlt3	Acbd3	1	1		Klhdc4
		Syap1	Acbd3	1	1		Cth
		Syap1	Parva	1	1		Ddah2
		Psmd12	Mki67ip	1	1		Dnaja3
		8430410A17Rik	E130012A19Rik	1	1		Trio
		8430410A17Rik	Rpp25	1	1		Gli2
		8430410A17Rik	Slc29a1	1	1		Gli1
		8430410A17Rik	Zfp296	1	1		Mrpl46
		8430410A17Rik	Dhx16	1	1		Igf2
		8430410A17Rik	Lap3	1	1		Apoe
		Snx9	Lrp10	1	1		Dnmt3l
		Trim13	Dppa4	1	1		Sdcbp
		Trim13	Dhx16	1	1		Ssr2
		Rsl1d1	Tipin	1	1		Nfyb
		Dpy30	Rrp9	1	1		Stard8
		Dpy30	Polr2h	1	1		Gbp2
		Dpy30	Wdr74	1	1		Srp19
		Dpy30	Rrn3	1	1		Gstt2
		Dpy30	Mrpl18	1	1		Antxr2
		Nip7	Polr2h	1	1		Polr2g
		Nip7	Wdr74	1	1		Polr2f
		Nip7	Tipin	1	1		Polr2b
		Nip7	Gpn1	1	1		Polr2i
		Nip7	Eef1d	1	1		Polr2h
		Znrd1	Wdr74	1	1		Polr2j
		Bag2	Clic1	1	1		Ptgs2
		Bag2	Itm2c	1	1		Cd24a
		Bag2	Tmx1	1	1		Cdk11b
		Ctsz	Tmem66	1	1		Gpc3
		Rbms1	Arpc2	1	1		Cdc25a
		Gabarap	Clic1	1	1		Zbtb45
		Actl6a	Dppa4	1	1		1810031K17Rik
		Actl6a	Sap30	1	1		Wisp1
		Actl6a	Tipin	1	1		Crb3
		Ftsj3	Ppan	1	1		Fam173a
		Ftsj3	Csda	1	1		Perp
		Ftsj3	Dnajc7	1	1		Rpl7l1
		Ftsj3	Tipin	1	1		Afp
		Ftsj3	Rpa1	1	1		Ldlrap1
		Ftsj3	Mki67ip	1	1		Kif20a
		Ftsj3	Eef1d	1	1		Gspt1
		Psmg1	Rfc5	1	1		Stmn2
		Psmg1	Dpy30	1	1		Ube2d3
		Crlf3	Trim13	1	1		Rnf128
		Dnmt3l	Dppa4	1	1		Rnf125
		Dnmt3l	Rpp25	1	1		Phlda2
		Dnmt3l	Zfp296	1	1		Mtif2
		Dnmt3l	Rpl39l	1	1		Chd1l
		Dnmt3l	Trim13	1	1		Marveld2
		Cldn7	Prss8	1	1		Dsg2
		Cldn6	Cldn7	1	1		Tulp4
		Irf6	Cldn7	1	1		Pfkp
		Elovl1	Parva	1	1		Fkbp10
		Elovl1	Lrp10	1	1		App
		Elovl1	Itm2c	1	1		Gpr124
		Elovl1	Tmem66	1	1		Prdx6
		Elovl1	Syap1	1	1		Mtfr1
		Elovl1	0610031J06Rik	1	1		Sel1l3
		Uba2	Sap30	1	1		Ifitm2
		Uba2	Tipin	1	1		Ifitm1
		Uba2	Rfc5	1	1		Bbx
		Uba2	Rpa1	1	1		Apaf1
		Uba2	Actl6a	1	1		Slbp
		Myadm	Actn1	1	1		4933424B01Rik
		Chek2	Helb	1	1		Arpc2
		Fbxo15	Ccnb1ip1	1	1		Dusp16
		Fbxo15	Dppa4	1	1		Sgpl1
		Fbxo15	Dppa3	1	1		Rpl7a
		Fbxo15	Dhx16	1	1		Arsa
		Fbxo15	8430410A17Rik	1	1		2410022L05Rik
		Fbxo15	Dnmt3l	1	1		Dapp1
		Gnl3	Rrn3	1	1		Mphosph10
		Gnl3	Tipin	1	1		Nufip1
		Gnl3	Mad2l1	1	1		Pcolce2
		Gnl3	Uba2	1	1		Slc4a2
		Timm10	Mki67ip	1	1		Cul7
		Timm10	Elac2	1	1		Calu
		Nr0b1	Dppa4	1	1		Epb4.9
		Nr0b1	Helb	1	1		Capn6
		Nr0b1	E130012A19Rik	1	1		Tm9sf1
		Nr0b1	Rpp25	1	1		Capn2
		Nr0b1	Jam2	1	1		Tm9sf3
		Nr0b1	Sap30	1	1		Blcap
		Nr0b1	Tdh	1	1		Dab2
		Nr0b1	Pcolce2	1	1		Rrbp1
		Nr0b1	Tipin	1	1		Igf2bp2
		Nr0b1	Dhx16	1	1		Rg9mtd2
		Nr0b1	Rpa1	1	1		H2-K1
		Nr0b1	Rpl39l	1	1		Phb
		Nr0b1	Lap3	1	1		Leprel4
		Nr0b1	8430410A17Rik	1	1		Mfap3
		Nr0b1	Znrd1	1	1		Mfap2
		Nr0b1	Crlf3	1	1		Plk1
		Nr0b1	Dnmt3l	1	1		Hyal2
		Nr0b1	Fbxo15	1	1		Cdc42ep1
		Mrpl15	Dppa4	1	1		Plk2
		Mrpl15	Rrn3	1	1		Plk4
		Mrpl15	Rfc5	1	1		Mosc2
		Mrpl15	Zswim1	1	1		Mrpl35
		Mrpl15	Ifitm1	1	1		Myh9
		Mrpl15	Dpy30	1	1		Rras
		Mrpl15	Psmg1	1	1		Arfgef1
		Abca3	Bag2	1	1		Eif4ebp1
		Ecsit	Rrp9	1	1		AW555464
		Plod3	Lrp10	1	1		Eif5a
		Klf6	Arl4c	1	1		Pdlim7
		Amfr	Itm2c	1	1		Pdlim1
		Amfr	Wls	1	1		Pdlim2
		Amfr	Rbms1	1	1		Rhox9
		Amfr	Gabarap	1	1		AU022870
		Amfr	Sh3glb1	1	1		Ppfibp2
		Ash2l	Dppa4	1	1		Prdm5
		Ash2l	Sap30	1	1		Polr1e
		Ash2l	Trim13	1	1		2410006H16Rik
		Ash2l	Nr0b1	1	1		Tgif1
		Msh6	Helb	1	1		Slc31a1
		Msh6	Sap30	1	1		Card10
		Msh6	Ifitm1	1	1		Tnfrsf21
		Msh6	Rpa1	1	1		G6pdx
		Msh6	Mkrn1	1	1		Sptlc2
		Msh6	Nr0b1	1	1		BC030867
		Klf2	Helb	1	1		Bub1
		Klf2	Fbxo15	1	1		Vnn1
		Klf2	Nr0b1	1	1		Psma2
		Ruvbl2	Wdr74	1	1		Gata6
		Cse1l	Ruvbl2	1	1		Rab22a
		Bmpr1a	Tmx1	1	1		Mrpl40
		Gfpt2	Nr0b1	1	1		Kif11
		Sdcbp	Clic1	1	1		Mrpl45
		Sdcbp	Maged1	1	1		2810004N23Rik
		Sdcbp	Gabarap	1	1		Psma8
		Sdcbp	Elovl1	1	1		Apoa1bp
		Vamp8	Lrp10	1	1		Nolc1
		Vamp8	Lass2	1	1		Dppa2
		Vamp8	Wls	1	1		Dppa3
		Vamp8	Snx9	1	1		Bat1a
		Vamp8	Elovl1	1	1		Zfp42
		Vamp8	Klf6	1	1		Ppp1r13b
		Vamp8	Amfr	1	1		Dppa4
		Eftud2	Rpa1	1	1		Triml1
		Eftud2	Uba2	1	1		Sh3bgrl
		Bop1	Rrp9	1	1		Krt19
		Bop1	Rrp12	1	1		Krt18
		Bop1	Fastkd5	1	1		Smpdl3b
		Bop1	Noc3l	1	1		Fosl2
		Bop1	Ftsj3	1	1		Lgals3
		Rasgrp2	Msrb2	1	1		Lgals1
		Rasgrp2	Nr0b1	1	1		Dck
		Rasgrp2	Aoah	1	1		Eftud2
		Sgce	Sepn1	1	1		Paics
		Sgce	Wls	1	1		Golga2
		Sgce	Elovl1	1	1		Rbm10
		Sgce	Vamp8	1	1		Tdrd12
		Orc1	Tipin	1	1		Rbm19
		Orc2	Rrn3	1	1		Srpk1
		Ltbp4	Dppa4	1	1		1190003J15Rik
		Ltbp4	Dhx16	1	1		Lmnb2
		Ltbp4	Dnmt3l	1	1		Nedd9
		Ltbp4	Nr0b1	1	1		Ppp2r1b
		Ltbp4	Slc7a7	1	1		Fgd1
		Morc1	Fbxo15	1	1		Ndn
		Morc1	Nr0b1	1	1		Grina
		Cyba	Clic1	1	1		Snapc3
		Cyba	Vamp8	1	1		Rbp1
		Emg1	Gnl3	1	1		Dis3
		Itm2b	Lrp10	1	1		Rbp4
		Itm2b	Amfr	1	1		Gfpt2
		Gsta4	Dppa4	1	1		Ankrd10
		Gsta4	Helb	1	1		Irf6
		Gsta4	Sap30	1	1		Cisd1
		Gsta4	Dnajc7	1	1		Manba
		Gsta4	Tipin	1	1		Prpf38a
		Gsta4	Rfc5	1	1		G3bp2
		Gsta4	Ifitm1	1	1		1700019D03Rik
		Gsta4	Rpa1	1	1		Cstb
		Gsta4	Trim13	1	1		Med12
		Gsta4	Nr0b1	1	1		Stxbp2
		Gsta4	Msh6	1	1		Slc25a24
		Gstm5	Vamp8	1	1		Bnip3
		Ugdh	Tmx1	1	1		Rpp25
		Mcm7	Rpa1	1	1		Cdyl
		Trmt1	Ppan	1	1		Ezh2
		Trmt1	Dhx16	1	1		Bop1
		Bcat2	Rfc5	1	1		Tfam
		Bcat2	Rpa1	1	1		Bend3
		Utf1	Dppa4	1	1		Kif18a
		Utf1	Helb	1	1		Inadl
		Utf1	Mkrn1	1	1		Nr5a2
		Cacybp	Helb	1	1		Dmd
		Cacybp	Csda	1	1		Rcn2
		Cacybp	Sap30	1	1		Rcn1
		Cacybp	Rrn3	1	1		Gba
		Cacybp	Tipin	1	1		Rrp9
		Cacybp	Rpa1	1	1		Lrrc34
		Cacybp	Ppid	1	1		Sh3glb1
		Cacybp	Uchl5	1	1		Postn
		Cacybp	Eef1d	1	1		Twf2
		Cacybp	Gnl3	1	1		Mybbp1a
		Cacybp	Nr0b1	1	1		Abcc4
		Cacybp	Atf1	1	1		Mtap7d1
		Rhox6	Rhox9	1	1		Dtwd1
		Tcea3	Nr0b1	1	1		Vars
		Tcea3	Rasgrp2	1	1		Bcat2
		Zcchc10	Dppa4	1	1		Bcat1
		Zcchc10	Sirt1	1	1		Sidt2
		Zcchc10	Ftsj3	1	1		Etf1
		Zcchc10	Nr0b1	1	1		Mre11a
		Ilk	Clic1	1	1		Aire
		Ilk	Itm2c	1	1		Polr3a
		Ilk	Snx9	1	1		Igfbp2
		Ilk	Phc2	1	1		Igfbp3
		Ilk	Elovl1	1	1		Oat
		Ilk	Abca3	1	1		Igfbp4
		Ilk	Vamp8	1	1		Phf5a
		Ilk	Sgce	1	1		Ppid
		Tbrg1	Abca3	1	1		Ppic
		Tbrg1	Ilk	1	1		Rmnd5b
		Slc7a3	Helb	1	1		Isy1
		Slc7a3	Dnajc21	1	1		Plin2
		Slc7a3	Tipin	1	1		Thoc4
		Slc7a3	Syce2	1	1		Zfp936
		Slc7a3	Rpa1	1	1		Vrk1
		Slc7a3	Bccip	1	1		Rnase4
		Slc7a3	Uba2	1	1		Zfp930
		Slc7a3	Gnl3	1	1		Fen1
		Slc7a3	Nr0b1	1	1		Lhfpl2
		Slc7a3	Bcat2	1	1		Tax1bp3
		Slc7a3	Cacybp	1	1		Sntb2
		Upp1	Nr0b1	1	1		Erbb2ip
		Upp1	Slc7a3	1	1		Cmtm8
		Tcl1	Fbxo15	1	1		Nob1
		Tcl1	Nr0b1	1	1		Cdc42
		Tcl1	Gfpt2	1	1		Psap
		Calu	Mcfd2	1	1		Hnrnpm
		Cirh1a	Samm50	1	1		Trip6
		Cirh1a	Rpa1	1	1		Hnrnpd
		Cirh1a	Uba2	1	1		Wdr34
		Cirh1a	Gnl3	1	1		Tbrg1
		Atp6ap1	Tmem66	1	1		Tbrg4
		Atp6ap1	Calu	1	1		Ubqln4
		Polr2j	Phf5a	1	1		Tnnc1
		Polr2j	Timm10	1	1		Coil
		Wbp5	Ngfrap1	1	1		Msx2
		Wbp5	Vamp8	1	1		Zic3
		Wbp5	Cyba	1	1		Elavl1
		Wbp5	Phlda1	1	1		Elavl2
		Adam10	Tmx1	1	1		Spna2
		Tuba4a	Psmg1	1	1		Praf2
		Tuba4a	Bcat2	1	1		Pin1
		Rnf103	Tmx1	1	1		Pbxip1
		Rnf103	Kdelr1	1	1		Pacsin2
		Mapkapk2	Ilk	1	1		Fzd2
		Trim28	Dppa4	1	1		Fzd5
		Trim28	Rrp12	1	1		Ninj1
		Trim28	Dnajc7	1	1		Dnajc7
		Trim28	Rrn3	1	1		Agrn
		Trim28	Xpot	1	1		1810009A15Rik
		Trim28	Rpa1	1	1		Gpn1
		Trim28	Rpl7l1	1	1		Glo1
		Trim28	Ruvbl2	1	1		Pir
		Trim28	Slc7a7	1	1		Kif3a
		Laptm4a	Lrp10	1	1		Ppp2r2d
		Rhob	BC013529	1	1		Mars
		Rhob	Parva	1	1		Psmb5
		Rhob	Lrp10	1	1		Psmb4
		Rhob	Itm2c	1	1		Adh5
		Rhob	Snx9	1	1		Tnfrsf1a
		Rhob	Bag2	1	1		Rnaseh1
		Rhob	Vamp8	1	1		Acadm
		Rhob	Sgce	1	1		Mcf2
		Rhob	Ilk	1	1		Zfp57
		Rhob	Mapkapk2	1	1		Edem1
		Exosc5	Rrp9	1	1		Dus1l
		Exosc5	Wdr74	1	1		Mrps26
		Exosc5	Ruvbl2	1	1		Mrps27
		Myo10	Xpot	1	1		Baiap2l1
		Myo10	Msh6	1	1		2810428I15Rik
		Myo10	Slc7a7	1	1		Dtd1
		Myo10	Utf1	1	1		Plp2
		Myo10	Trim28	1	1		Zfp428
		Sox17	Foxa2	1	1		Dbr1
		Lyar	Exosc2	1	1		Zyx
		Lyar	Polr2h	1	1		Nat10
		Lyar	Sdad1	1	1		Wfdc2
		Lyar	Csda	1	1		Hsbp1
		Lyar	Tipin	1	1		Ndufa2
		Lyar	Nup37	1	1		Pacs1
		Lyar	Dis3	1	1		Atp6ap1
		Lyar	Eef1d	1	1		Coro1b
		Lyar	Eef1e1	1	1		Acot10
		Lyar	Mad2l1	1	1		Krr1
		Lyar	Ftsj3	1	1		Vegfc
		Lyar	Gnl3	1	1		Pycard
		Lyar	Cacybp	1	1		Adm
		Lefty1	Slc7a7	1	1		Lrpprc
		Nsun2	Nup107	1	1		Ect2
		Nsun2	Tipin	1	1		Prss12
		Nsun2	Rfc5	1	1		Golm1
		Nsun2	Samm50	1	1		Bag2
		Nsun2	Rpa1	1	1		Bag3
		Nsun2	Dpy30	1	1		Heatr1
		Nsun2	Bccip	1	1		2310004I24Rik
		Nsun2	Uba2	1	1		Tspan14
		Nsun2	Gnl3	1	1		9530068E07Rik
		Nsun2	Bcat2	1	1		Tnc
		Nsun2	Slc7a3	1	1		Lztr1
		Nsun2	Cirh1a	1	1		Folr1
		Zic3	Slc7a7	1	1		Zfp259
		Tars	Psat1	1	1		Nusap1
		Tars	Psmg1	1	1		Ankrd1
		Tars	Nr0b1	1	1		Ddx10
		Tars	Lyar	1	1		Tipin
		D19Bwg1357e	Rrn3	1	1		A830007P12Rik
		D19Bwg1357e	Ftsj3	1	1		Tmem8
		D19Bwg1357e	Trim28	1	1		Tmem9
		Hells	Dppa4	1	1		Gpr108
		Hells	Helb	1	1		Noc4l
		Hells	C79407	1	1		Rps27
		Hells	Sap30	1	1		Srsf7
		Hells	Tipin	1	1		Srsf6
		Hells	Xpot	1	1		Fastkd2
		Hells	Zmym1	1	1		Timm10
		Hells	Rpa1	1	1		Srsf2
		Hells	Trim13	1	1		Srsf9
		Hells	Eef1e1	1	1		Esd
		Hells	Uba2	1	1		Rcn3
		Hells	Chek2	1	1		Lcp1
		Hells	Gnl3	1	1		Utf1
		Hells	Nr0b1	1	1		Tmem131
		Hells	Msh6	1	1		Pomp
		Hells	Orc1	1	1		Nck2
		Hells	Cacybp	1	1		Slc38a2
		Hells	Chek1	1	1		Lrrc2
		Hells	Zcchc10	1	1		Tcta
		Hells	Slc7a3	1	1		Ndufaf2
		Hells	Trim28	1	1		Rgma
		Hells	Lyar	1	1		Prps2
		Hells	Nsun2	1	1		Hcfc1r1
		Tagln	Anxa3	1	1		BC048355
		Anxa5	Cmtm3	1	1		Prkcd
		Anxa5	Parva	1	1		Rnmt
		Anxa5	Lrp10	1	1		Mprip
		Anxa5	Itm2c	1	1		Myo18a
		Anxa5	Wls	1	1		Lad1
		Anxa5	Elovl1	1	1		Nif3l1
		Anxa5	Tagln	1	1		Jak1
		Mcm2	Orc1	1	1		Fancl
		Mcm2	Hells	1	1		Hpcal1
		Gpx3	Ctsz	1	1		Gas2l1
		Cnn2	Tagln	1	1		BC013529
		Mtf2	Trim13	1	1		Rbbp7
		Rest	Myo10	1	1		Ccnf
		Coil	Dppa4	1	1		Tcfec
		Coil	Sap30	1	1		Snta1
		Coil	Rpa1	1	1		Prr13
		Coil	Crlf3	1	1		Armcx2
		Coil	Nr0b1	1	1		Klf6
		Coil	Msh6	1	1		Mrpl4
		Jarid2	Nr0b1	1	1		Klf2
		Peg3	Rhob	1	1		Wbp5
		Cct3	Uba2	1	1		Snx3
		Cct3	Gnl3	1	1		Snx1
		Cct3	Ruvbl2	1	1		Snx7
		Soat1	Lrp10	1	1		Asah1
		Soat1	Bag2	1	1		Snx5
		Soat1	Klf6	1	1		Snx9
		Soat1	Vamp8	1	1		Rbmxrt
		Soat1	Gstm5	1	1		C1galt1c1
		Soat1	Ilk	1	1		Gnb2l1
		Tcf15	Sap30	1	1		Rrm2
		Tcf15	Tipin	1	1		2700097O09Rik
		Tcf15	Dhx16	1	1		Cdc5l
		Tcf15	Nr0b1	1	1		Il10rb
		Tcf15	Ltbp4	1	1		Rabac1
		Tcf15	Utf1	1	1		Rest
		Tcf15	Tcea3	1	1		Msrb2
		Tcf15	Hells	1	1		Tcfap2c
		Pml	Mkrn1	1	1		Hnrnpab
		Pml	Slc7a7	1	1		Ell2
		Pml	Myo10	1	1		Shmt1
		Xrcc5	Tipin	1	1		Pim2
		Xrcc5	Rpa1	1	1		Dsp
		Xrcc5	Psmg1	1	1		Tmem128
		Xrcc5	Nr0b1	1	1		Xrcc5
		Xrcc5	Msh6	1	1		Wdr74
		Xrcc5	Gsta4	1	1		Wdr77
		Xrcc5	Coil	1	1		Xrcc6
		Phc1	Polr2h	1	1		Mvp
		Phc1	Dppa4	1	1		0610007C21Rik
		Phc1	Helb	1	1		Pdcd6ip
		Phc1	Fastkd5	1	1		Psmc3
		Phc1	Akap12	1	1		Psmc5
		Phc1	Sap30	1	1		Amot
		Phc1	Tipin	1	1		Ints9
		Phc1	2700097O09Rik	1	1		Tdrd7
		Phc1	Rfc5	1	1		Parp1
		Phc1	Rpa1	1	1		Parp2
		Phc1	Mkrn1	1	1		Srsf15
		Phc1	Chek2	1	1		Srsf11
		Phc1	Gnl3	1	1		N4bp3
		Phc1	Nr0b1	1	1		Lrp10
		Phc1	Msh6	1	1		D0H4S114
		Phc1	Orc1	1	1		Dpy30
		Phc1	Ltbp4	1	1		Trmt1
		Phc1	Ifrd2	1	1		Mrps31
		Phc1	Gsta4	1	1		Arl6
		Phc1	Bcat2	1	1		Ctgf
		Phc1	Utf1	1	1		Sepp1
		Phc1	Cacybp	1	1		Chrnb1
		Phc1	Pipox	1	1		Plcg2
		Phc1	Slc7a3	1	1		Plaur
		Phc1	Myo10	1	1		Tead2
		Phc1	Nsun2	1	1		Rnf17
		Phc1	Hells	1	1		Rnf10
		Phc1	Mcm2	1	1		Rnf11
		Phc1	Coil	1	1		Srrt
		Phc1	Tcf15	1	1		Cct8
		Phc1	Pml	1	1		C1qbp
		Phc1	Xrcc5	1	1		Arhgap21
		Adsl	Tipin	1	1		Rad1
		Adsl	Rpa1	1	1		9130401M01Rik
		Adsl	Uba2	1	1		Hspb2
		Adsl	Gnl3	1	1		Serpine1
		Adsl	Nsun2	1	1		Serpine2
		Mcm4	Rpa1	1	1		Mdk
		Mcm4	Slc7a3	1	1		Fbxo18
		Mcm4	Hells	1	1		Ahcyl1
		Mcm5	Wdr74	1	1		Asna1
		Mcm5	Sdad1	1	1		Foxd3
		Mcm5	Rrn3	1	1		Fbxo15
		Mcm5	Tipin	1	1		Ccnb1ip1
		Mcm5	Ddx39	1	1		Adam23
		Mcm5	Rpa1	1	1		Ina
		Mcm5	Eef1d	1	1		Spata5
		Mcm5	Dpy30	1	1		Mapk8ip3
		Mcm5	Psmg1	1	1		Slc35f5
		Mcm5	Ruvbl2	1	1		Errfi1
		Mcm5	Orc1	1	1		Galk1
		Mcm5	Ifrd2	1	1		Ak3
		Mcm5	Bcat2	1	1		Ak2
		Mcm5	Trim28	1	1		Cct5
		Mcm5	Lyar	1	1		Lzts2
		Mcm5	Nsun2	1	1		Ddx21
		Mcm5	D19Bwg1357e	1	1		Ddx20
		Mcm5	Hells	1	1		Ddx27
		Mcm5	Mcm2	1	1		Mrps9
		Mcm5	Pml	1	1		Mrps5
		Mcm5	Xrcc5	1	1		Sparc
		Mcm5	Phc1	1	1		Ssr3
		Mcm5	Mcm4	1	1		Ssr4
		Efnb1	Lrp10	1	1		Pou5f1
		Gng3	Slc7a3	1	1		Bsg
		Gng3	Crmp1	1	1		Hirip3
		Gng3	Phc1	1	1		Lrwd1
		Srm	Ppan	1	1		Rcl1
		Srm	Tipin	1	1		Etfdh
		Srm	Ifrd2	1	1		Lpp
		Srm	Trim28	1	1		Tomm70a
		Srm	Nsun2	1	1		Copb1
		Pou5f1	Dppa4	1	1		Abce1
		Pou5f1	Helb	1	1		Crlf2
		Pou5f1	Sap30	1	1		Crlf3
		Pou5f1	Rrn3	1	1		Birc5
		Pou5f1	Pcolce2	1	1		Tcea3
		Pou5f1	2700097O09Rik	1	1		Tuft1
		Pou5f1	Rpa1	1	1		Bex2
		Pou5f1	8430410A17Rik	1	1		Lgmn
		Pou5f1	Trim13	1	1		Pcgf6
		Pou5f1	Dpy30	1	1		Msh2
		Pou5f1	Dnmt3l	1	1		Vps37c
		Pou5f1	Fbxo15	1	1		Msh6
		Pou5f1	Nr0b1	1	1		Mki67ip
		Pou5f1	Mrpl15	1	1		Tuba4a
		Pou5f1	Msh6	1	1		Mapkapk2
		Pou5f1	Slc7a7	1	1		Anxa1
		Pou5f1	Orc1	1	1		Anxa3
		Pou5f1	Ltbp4	1	1		Anxa2
		Pou5f1	Ifrd2	1	1		Anxa5
		Pou5f1	Gsta4	1	1		Anxa4
		Pou5f1	Utf1	1	1		Dars2
		Pou5f1	Cacybp	1	1		Emg1
		Pou5f1	Slc7a3	1	1		Atf4
		Pou5f1	Upp1	1	1		Atf1
		Pou5f1	Trim28	1	1		Smarca5
		Pou5f1	Lyar	1	1		Atf3
		Pou5f1	Nsun2	1	1		Riok2
		Pou5f1	Hells	1	1		Bax
		Pou5f1	Coil	1	1		Pcbp4
		Pou5f1	Xrcc5	1	1		Cmtm3
		Pou5f1	Phc1	1	1		Gdi1
		Pou5f1	Mcm5	1	1		Erh
		Gnb2l1	Rps5	1	1		Toe1
		Mybl2	Zswim1	1	1		Nipsnap1
		Mybl2	Nr0b1	1	1		Lbr
		Mybl2	Utf1	1	1		Inpp5d
		Mcl1	Phc1	1	1		Ran
		Epb4.9	Nr0b1	0.999999	1		Pole
		Pola1	Nr0b1	0.999999	1		Ltbr
		Pola1	Phc1	0.999999	1		Dram2
		Etv4	8430410A17Rik	0.999999	1		Tgfbr2
		Bat1a	Trim28	0.999999	1		Rpl39l
		Zfp57	8430410A17Rik	0.999999	1		Rrn3
		Zfp57	Fbxo15	0.999999	1		Tpi1
		Zfp57	Nr0b1	0.999999	1		Cops4
		Zfp42	Dppa4	0.999999	1		Pla2g1b
		Zfp42	Helb	0.999999	1		Osbp
		Zfp42	Csda	0.999999	1		Pa2g4
		Zfp42	Rrn3	0.999999	1		Cdc6
		Zfp42	Dhx16	0.999999	1		Irs2
		Zfp42	Rpa1	0.999999	1		Tcf15
		Zfp42	Trim13	0.999999	1		Prpf8
		Zfp42	Klf2	0.999999	1		Aurka
		Zfp42	Morc1	0.999999	1		Mbd3
		Zfp42	Gsta4	0.999999	1		Mbd2
		Zfp42	Cacybp	0.999999	1		Prpf3
		Zfp42	Tcl1	0.999999	1		Pla2g10
		Zfp42	Myo10	0.999999	1		Tmsb4x
		Zfp42	Coil	0.999999	1		Arhgef5
		Zfp42	Tcf15	0.999999	1		Ung
		Trp53	Nr0b1	0.999999	1		Sirt2
		Trp53	Tcea3	0.999999	1		Sirt1
		Trp53	Trim28	0.999999	1		C79407
		Trh	Pla2g1b	0.999999	1		Sox11
		Trap1a	Ltbp4	0.999999	1		Hspb8
		Tnnc1	Elovl1	0.999999	1		Sox17
		Timp3	Wls	0.999999	1		Ebna1bp2
		Tgfbr2	Parva	0.999999	1		2810025M15Rik
		Tdgf1	Pcolce2	0.999999	1		Mcm10
		Tdgf1	Pml	0.999999	1		Acox1
		Tcn2	Stard10	0.999999	1		Ergic3
		Tcn2	Rnf103	0.999999	1		Pdpn
		Tcn2	Laptm4a	0.999999	1		Derl1
		Spp1	Zfp42	0.999999	1		Aldh9a1
		Spp1	Dhx16	0.999999	1		Clu
		Spp1	Ifitm3	0.999999	1		Iars
		Sox2	Tdgf1	0.999999	1		Clic1
		Sox2	Csda	0.999999	1		Gabarap
		Sox2	Tipin	0.999999	1		Pink1
		Sox2	Mkrn1	0.999999	1		Acp6
		Sox2	Uba2	0.999999	1		Add1
		Sox2	Nr0b1	0.999999	1		Wwtr1
		Sox2	Twf2	0.999999	1		Itm2c
		Sox2	Utf1	0.999999	1		Itm2b
		Sox2	Ung	0.999999	1		Dus3l
		Sod2	Dnajc7	0.999999	1		Blm
		Sod2	Klf2	0.999999	1		Klhl22
		Sod2	Gsta4	0.999999	1		Reep3
		Snrpd1	Naa38	0.999999	1		1110038D17Rik
		Smpd1	Maged1	0.999999	1		Tmco7
		Smpd1	Wls	0.999999	1		Qtrtd1
		Smpd1	Kdelr1	0.999999	1		Rnpepl1
		Smpd1	Stx7	0.999999	1		Mef2a
		Smpd1	Wbp5	0.999999	1		Krt7
		Rras	Nek6	0.999999	1		Krt8
		Rras	Flot2	0.999999	1		Acp2
		Rad51	Orc1	0.999999	1		Frzb
		Rbp4	Ctsh	0.999999	1		Adam10
		Rbp1	Rbms1	0.999999	1		2610528E23Rik
		Ppa1	Wdr74	0.999999	1		Nucks1
		Ppa1	Rfc5	0.999999	1		Srgn
		Ppa1	2810004N23Rik	0.999999	1		Pttg1ip
		Ppa1	Dpy30	0.999999	1		Mthfd1l
		Ppa1	Orc1	0.999999	1		Sypl
		Ppa1	Lyar	0.999999	1		Dhx16
		Ppa1	Nsun2	0.999999	1		8430410A17Rik
		Ptpra	Clic1	0.999999	1		Ddx39
		Ppic	Gpx3	0.999999	1		Mthfd1
		Pmp22	Rbms1	0.999999	1		Gjb3
		Pmp22	Fhl2	0.999999	1		Gjb5
		Pmp22	Ilk	0.999999	1		Rars
		Pmp22	Efnb1	0.999999	1		Six4
		Prkcd	Tcn2	0.999999	1		Dbf4
		Furin	Smpd1	0.999999	1		Stip1
		Odc1	Ppa1	0.999999	1		Abcf2
		Odc1	Ppan	0.999999	1		Rrs1
		Odc1	Wdr74	0.999999	1		Nsun2
		Odc1	Nip7	0.999999	1		Nsun5
		Nucb1	Sparc	0.999999	1		Prim1
		Nucb1	Pttg1ip	0.999999	1		Blmh
		Nucb1	Lrp10	0.999999	1		Chek2
		Nucb1	Itm2c	0.999999	1		1190005I06Rik
		Nefh	Ltbp4	0.999999	1		Chek1
		Ndn	Pfn2	0.999999	1		Gyg
		Ncl	Rrn3	0.999999	1		Reck
		Ncl	Psmd12	0.999999	1		Tln1
		Ncl	Eef1d	0.999999	1		Trim59
		Ncl	Actl6a	0.999999	1		Mybl2
		Ncl	Ruvbl2	0.999999	1		Lck
		Ncl	Cirh1a	0.999999	1		Rasip1
		Ncl	Lyar	0.999999	1		Clcn4-2
		Ncl	Hells	0.999999	1		Pvr
		Ncl	Adsl	0.999999	1		Urb2
		Ncl	Mcm5	0.999999	1		Sox2
		Mcf2	Slc7a3	0.999999	1		Mbnl2
		Anxa1	S100a6	0.999999	1		Cables2
		Lgals1	S100a6	0.999999	1		Pcna
		Lck	Wdr74	0.999999	1		Smarcb1
		Krt19	Tagln2	0.999999	1		Otx2
		Krt18	Plekhg2	0.999999	1		Hipk3
		Krt18	Amotl2	0.999999	1		Pcnt
		Krt18	Itm2c	0.999999	1		Utp20
		Krt18	Phc2	0.999999	1		Helb
		Krt18	Cyba	0.999999	1		Fos
		Krt18	Anxa3	0.999999	1		Lsm4
		Krt18	Wbp5	0.999999	1		Eef1d
		Krt18	Rhob	0.999999	1		Lsm1
		Jun	Krt19	0.999999	1		Lsm2
		Jun	Lpp	0.999999	1		Lsm3
		Jun	Parva	0.999999	1		Guk1
		Jun	1110038D17Rik	0.999999	1		Zmynd11
		Jun	Snx9	0.999999	1		Cbx7
		Jun	Amfr	0.999999	1		Cse1l
		Jun	Bmpr1a	0.999999	1		Cbx4
		Jun	Sdcbp	0.999999	1		Zmynd19
		Jun	Itm2b	0.999999	1		Bub1b
		Jun	Tuft1	0.999999	1		Cdt1
		Jun	Wbp5	0.999999	1		H2-Q2
		Jun	Atf3	0.999999	1		Tm7sf3
		Jun	Anxa5	0.999999	1		Cdca7l
		Jun	Soat1	0.999999	1		Ttpa
		Jun	Efnb1	0.999999	1		Tomm40
		Igf2	F2r	0.999999	1		Pipox
		Id3	Bex2	0.999999	1		Tada2a
		Ranbp1	Csda	0.999999	1		Exo1
		Ranbp1	Ruvbl2	0.999999	1		Utp14a
		Ranbp1	Cse1l	0.999999	1		St14
		Ranbp1	Lyar	0.999999	1		Hars
		Hat1	Dppa4	0.999999	1		Bicd2
		Hat1	Gnl3	0.999999	1		Mt2
		Hat1	Hells	0.999999	1		Mt1
		H2-Ke2	Phf5a	0.999999	1		Cryab
		H2-Ke2	Tipin	0.999999	1		Dnajc21
		H2-Ke2	Rpl7l1	0.999999	1		Apobec3
		H2-Ke2	Slc7a3	0.999999	1		Mlh1
		H2-Ke2	Lyar	0.999999	1		D1Pas1
		H2-Ke2	Mcm5	0.999999	1		Laptm4a
		Guk1	Rrp9	0.999999	1		Hspa4
		Guk1	Wdr74	0.999999	1		Rcan1
		Guk1	Mrpl12	0.999999	1		Cars
		Guk1	Lyar	0.999999	1		Pik3cb
		Gsn	Lgals1	0.999999	1		Man1a
		Grn	Nucb1	0.999999	1		Plat
		Gnb2	Smpd1	0.999999	1		Parva
		Gnb2	Maged2	0.999999	1		Ctdsp1
		Gnb2	Mapkapk2	0.999999	1		Nxf7
		Gli1	Epb4.9	0.999999	1		Nxf1
		Ghr	Elovl1	0.999999	1		Emb
		Gdf3	Zp3	0.999999	1		Gipc1
		Gdf3	Nefh	0.999999	1		Flt1
		Gdf3	Ppan	0.999999	1		Ctdspl
		Gdf3	Wdr74	0.999999	1		Abcb1a
		Gdf3	Fastkd5	0.999999	1		Dsc2
		Gdf3	Tipin	0.999999	1		Car4
		Gdf3	Gpn1	0.999999	1		Ciao1
		Gdf3	Rfc5	0.999999	1		Crtc3
		Gdf3	1700019D03Rik	0.999999	1		Cyba
		Gdf3	Sult4a1	0.999999	1		Eps8l2
		Gdf3	Chek2	0.999999	1		Got1
		Gdf3	Cox4nb	0.999999	1		Rab15
		Gdf3	Utf1	0.999999	1		Htra1
		Gdf3	Cacybp	0.999999	1		Pgk1
		Gdf3	Etv5	0.999999	1		Orc6
		Gdf3	Tuba4a	0.999999	1		Orc5
		Gdf3	Lefty1	0.999999	1		Orc2
		Gdf3	Adsl	0.999999	1		Orc1
		Gdf3	Srm	0.999999	1		Acta2
		Gdf3	H2afx	0.999999	1		BC032203
		Gbx2	Zfp296	0.999999	1		Copa
		Gbx2	Tcf15	0.999999	1		Ash2l
		Gbx2	Pml	0.999999	1		Eif2b4
		Gart	Trp53	0.999999	1		Eif2b1
		Gart	Ncl	0.999999	1		Ppip5k2
		Gart	Rrp9	0.999999	1		Anp32e
		Gart	Dppa4	0.999999	1		Ddx1
		Gart	Helb	0.999999	1		Rad51
		Gart	Csda	0.999999	1		Lrrfip1
		Gart	Srrt	0.999999	1		Ilk
		Gart	Dhodh	0.999999	1		Fst
		Gart	Tipin	0.999999	1		Fam136a
		Gart	Cse1l	0.999999	1		2410002O22Rik
		Gart	Bub1b	0.999999	1		Kars
		Gart	Gsta4	0.999999	1		Pnldc1
		Gart	Slc7a3	0.999999	1		Cirh1a
		Gart	Mre11a	0.999999	1		Kpnb1
		Gart	Lyar	0.999999	1		Vkorc1
		Gart	Nsun2	0.999999	1		Epb4.1l5
		Gabpa	Gdf3	0.999999	1		Tapbp
		Gabpa	Msh6	0.999999	1		Mrps12
		Gabpa	Pou5f1	0.999999	1		1300001I01Rik
		Xrcc6	Tipin	0.999999	1		Psen1
		Xrcc6	Cct3	0.999999	1		Nrip1
		Fkbp4	Lyar	0.999999	1		Nubp2
		Fkbp4	Mcm2	0.999999	1		Mylip
		Ets1	Itm2c	0.999999	1		Zfp207
		Eed	Sox2	0.999999	1		Ctsh
		Eed	Gart	0.999999	1		Eomes
		Eed	Rrp12	0.999999	1		Ctsl
		Eed	Wdr74	0.999999	1		Smagp
		Eed	Nop58	0.999999	1		Sgk1
		Eed	Noc3l	0.999999	1		Cd151
		Eed	Orc6	0.999999	1		Ctsa
		Eed	Zfp296	0.999999	1		Ctsb
		Eed	Tdh	0.999999	1		Ctsc
		Eed	Tipin	0.999999	1		Ctsd
		Eed	Eef1d	0.999999	1		Ddx46
		Eed	Dpy30	0.999999	1		Tcirg1
		Eed	Dnmt3l	0.999999	1		Ctsz
		Eed	Uba2	0.999999	1		Rexo2
		Eed	Gnl3	0.999999	1		Gns
		Eed	Hspa4	0.999999	1		Cenpm
		Eed	Orc2	0.999999	1		Ccna2
		Eed	Morc1	0.999999	1		Cenpa
		Eed	Cirh1a	0.999999	1		Kdm4c
		Eed	Mtf2	0.999999	1		Ckap2
		Eed	Srm	0.999999	1		Eprs
		Ect2	Rpa1	0.999999	1		Cldn3
		Epha2	Gdf3	0.999999	1		Cldn4
		Dmd	Phc1	0.999999	1		Cldn6
		Sept8	Pdlim2	0.999999	1		Cldn7
		Sept8	Rap2c	0.999999	1		Ptges3
		Sept8	Fbxl12	0.999999	1		Nudt5
		Ctsl	Tcn2	0.999999	1		Rcor1
		Ctsl	Gabarap	0.999999	1		Smpd1
		Ctsl	Stx7	0.999999	1		Plxna2
		Ctsl	Lgmn	0.999999	1		Serpini1
		Ctsl	Itm2b	0.999999	1		Fbln1
		Ctsd	Tcn2	0.999999	1		Nudt19
		Ctsd	Nucb1	0.999999	1		Maged2
		Ctsd	Elovl1	0.999999	1		Socs3
		Ctsd	Rabac1	0.999999	1		Socs2
		Cryab	Anxa5	0.999999	1		Idh2
		Col4a2	Timp3	0.999999	1		Naglu
		Col4a2	Tgfbr2	0.999999	1		Eif2a
		Col4a2	Tcn2	0.999999	1		Ythdf1
		Col4a2	Pdgfra	0.999999	1		Snrpe
		Col4a2	Nucb1	0.999999	1		D19Wsu162e
		Col4a2	Krt19	0.999999	1		Gna13
		Col4a2	Krt18	0.999999	1		S100a11
		Col4a2	Ctsl	0.999999	1		S100a10
		Col4a2	Maged2	0.999999	1		Utp18
		Col4a2	Lrp10	0.999999	1		Eme1
		Col4a2	Elovl1	0.999999	1		Hells
		Col4a2	Abca3	0.999999	1		Cdkn1c
		Col4a2	Vamp8	0.999999	1		Plod3
		Col4a2	Mapkapk2	0.999999	1		Cdkn1a
		Col4a2	Cited1	0.999999	1		Plod1
		Col4a2	Laptm4a	0.999999	1		Tjp1
		Col4a2	Rhob	0.999999	1		Ecsit
		Col4a1	Fhl2	0.999999	1		Ruvbl1
		F3	Serpine1	0.999999	1		Ugp2
		Ccne1	Lck	0.999999	1		2310030G06Rik
		Ccne1	H2-Ke2	0.999999	1		Gpt2
		Ccne1	Ccnb1ip1	0.999999	1		1500003O03Rik
		Ccne1	Klhdc4	0.999999	1		Nuak1
		Ccne1	E130012A19Rik	0.999999	1		Nucb1
		Ccne1	Noc4l	0.999999	1		Hspa14
		Ccne1	Sap30	0.999999	1		Nol8
		Ccne1	Dnajc7	0.999999	1		Rsl24d1
		Ccne1	Rbm19	0.999999	1		Map1lc3a
		Ccne1	Zmym1	0.999999	1		Phlda1
		Ccne1	Rpa1	0.999999	1		Phlda3
		Ccne1	Eef1d	0.999999	1		Vim
		Ccne1	Trim13	0.999999	1		Efnb1
		Ccne1	Crlf3	0.999999	1		Cyct
		Ccne1	Ruvbl2	0.999999	1		Prdx1
		Ccne1	Orc1	0.999999	1		AI848100
		Ccne1	Cirh1a	0.999999	1		Gadd45gip1
		Ccne1	Rest	0.999999	1		Tgoln1
		Ccne1	Cct3	0.999999	1		Pitx2
		Ccne1	Pml	0.999999	1		Loxl2
		Ccne1	Ccnf	0.999999	1		2900011O08Rik
		Ccne1	Mybl2	0.999999	1		P4ha2
		Serpinh1	Clic1	0.999999	1		Mogat2
		Capn2	Pmp22	0.999999	1		Ifngr2
		Capn2	Anxa1	0.999999	1		2310008H09Rik
		Capn2	Lrp10	0.999999	1		Mthfd2
		Capn2	Rbms1	0.999999	1		Wdr43
		Capn2	Amfr	0.999999	1		Myo10
		Capn2	Phlda1	0.999999	1		Wdr46
		Cald1	Capn2	0.999999	1		Smad3
		Cald1	Farp1	0.999999	1		Pml
		Cald1	Clic1	0.999999	1		Yaf2
		Cald1	Slc35f5	0.999999	1		Grwd1
		Cald1	Wwtr1	0.999999	1		Ctnnbl1
		Cald1	Elovl1	0.999999	1		D2Wsu81e
		Cald1	Rhob	0.999999	1		Taf5
		Anxa2	Sparc	0.999999	1		Vbp1
		Anxa2	Pmp22	0.999999	1		Smc2
		Anxa2	Fos	0.999999	1		Taf9
		Anxa2	F3	0.999999	1		Gtsf1l
		Anxa2	Spg20	0.999999	1		Map2k5
		Anxa2	Parva	0.999999	1		Slc22a23
		Anxa2	Elovl1	0.999999	1		Prnp
		Anxa2	Mprip	0.999999	1		Park7
		Anxa2	Csf1	0.999999	1		Eif6
		Anxa2	Rhob	0.999999	1		Sf3b2
		B2m	Timp3	0.999999	1		Cradd
		B2m	Pmp22	0.999999	1		Pola1
		B2m	Gsn	0.999999	1		Cyb5r1
		B2m	Flt1	0.999999	1		Ltv1
		B2m	Bsg	0.999999	1		Mast2
		B2m	Cmtm3	0.999999	1		Prss8
		B2m	Phldb2	0.999999	1		Dpp4
		B2m	Lpp	0.999999	1		Lars
		B2m	Sepn1	0.999999	1		Tmcc3
		B2m	Sirt2	0.999999	1		Foxa1
		B2m	Lass2	0.999999	1		Fbxo21
		B2m	Rap2c	0.999999	1		Foxa2
		B2m	1810031K17Rik	0.999999	1		Tbl3
		B2m	Kdelr1	0.999999	1		Asf1a
		B2m	Rbms1	0.999999	1		Kdm5b
		B2m	Elovl1	0.999999	1		Otud7b
		B2m	Arhgef5	0.999999	1		Rhebl1
		B2m	Klf6	0.999999	1		Usp47
		B2m	Gng12	0.999999	1		Usp46
		B2m	Mapkapk2	0.999999	1		Gtf3c6
		B2m	Cited1	0.999999	1		Slc39a6
		B2m	Ltbr	0.999999	1		Ilf2
		B2m	Serpine2	0.999999	1		Glipr2
		App	Atp6ap1	0.999999	1		Glipr1
		App	Rhob	0.999999	1		Trib3
		Apoe	Spink3	0.999999	1		Rbmx
		Apex1	Zfp42	0.999999	1		Syce2
		Apex1	Trp53	0.999999	1		Dlk1
		Apex1	Srsf2	0.999999	1		Dhx30
		Apex1	Ncl	0.999999	1		Med8
		Apex1	Gart	0.999999	1		Surf4
		Apex1	Phf5a	0.999999	1		Surf6
		Apex1	Rrp12	0.999999	1		Cxadr
		Apex1	Fastkd5	0.999999	1		Kdelr1
		Apex1	Csda	0.999999	1		Atp5j2
		Apex1	Dnajc7	0.999999	1		Cops3
		Apex1	Hnrnpm	0.999999	1		Cpt2
		Apex1	Xpot	0.999999	1		Ddx56
		Apex1	2810432D09Rik	0.999999	1		Ddx54
		Apex1	Srsf6	0.999999	1		Sipa1l2
		Apex1	Lsm3	0.999999	1		Ccnb1
		Apex1	Ftsj3	0.999999	1		Hexa
		Apex1	Ruvbl2	0.999999	1		Ifnar2
		Apex1	Cirh1a	0.999999	1		Zfp106
		Apex1	Mcm2	0.999999	1		Zfp105
		Apex1	Phc1	0.999999	1		Fasn
		Apex1	Mcm4	0.999999	1		Flot1
		Apex1	Mcm5	0.999999	1		Flot2
		Anxa4	Jun	0.999999	1		Hck
		Adh5	Eed	0.999999	1		Gprc5c
		Adh5	Sap30	0.999999	1		Brca1
		Adh5	Bccip	0.999999	1		Brca2
		Adh5	Nr0b1	0.999999	1		Rps16
		Adh5	Orc5	0.999999	1		Abt1
		Adh5	Nit2	0.999999	1		Pfn2
		Plin2	F3	0.999999	1		Rdh10
		Plin2	Cald1	0.999999	1		Serpinh1
		Plin2	Clic1	0.999999	1		Stat4
		Plin2	Rbms1	0.999999	1		Stat3
		Plin2	Elovl1	0.999999	1		6330577E15Rik
		Plin2	Anxa3	0.999999	1		Pmm1
		Plin2	Mapkapk2	0.999999	1		Srprb
		Plin2	Laptm4a	0.999999	1		Ttk
		Acta2	Tagln	0.999999	1		Rbms1
		Dppa4	Ppan	0.999999	1		Eras
		Phf5a	Etf1	0.999999	1		Rbms2
		Rrp12	Dppa4	0.999999	1		Cald1
		Rpp25	E130012A19Rik	0.999999	1		Bid
		Plekhg2	Lpp	0.999999	1		Bnip3l
		Plekhg2	Pdlim2	0.999999	1		1810019J16Rik
		Noc4l	Ppan	0.999999	1		Cul4a
		Nat10	Nsun5	0.999999	1		Bccip
		Jam2	BC032203	0.999999	1		Tex264
		Srrt	Ppan	0.999999	1		Nek6
		Noc3l	Heatr1	0.999999	1		Morc1
		Parva	Plekhg2	0.999999	1		Morc4
		Maged1	Clic1	0.999999	1		Pnp
		Lrp10	BC013529	0.999999	1		Nek9
		Lrp10	Sepn1	0.999999	1		Tmem150a
		Lrp10	Cdc42ep1	0.999999	1		Pnn
		Sap30	Csda	0.999999	1		Nasp
		Sap30	Park7	0.999999	1		Eif3k
		Dhodh	Helb	0.999999	1		Zmynd8
		Itm2c	Pttg1ip	0.999999	1		Ypel3
		Itm2c	Mtap7d1	0.999999	1		Sf3b5
		Trio	Itm2c	0.999999	1		Eif3b
		Dnajc21	Sap30	0.999999	1		Eif3d
		Ddx10	Sdad1	0.999999	1		Eif3e
		Usp47	Clic1	0.999999	1		Sf3b3
		Usp47	Tdrd7	0.999999	1		Eif3g
		Usp47	Lrp10	0.999999	1		Phldb1
		Tipin	Psat1	0.999999	1		Phldb2
		Tipin	Fastkd5	0.999999	1		S100a6
		Gpn1	Ccnb1ip1	0.999999	1		S100a1
		Gpn1	Rrp12	0.999999	1		Mrpl20
		Lrrc2	Usp28	0.999999	1		Gbx2
		Ttc27	Dhodh	0.999999	1		F3
		Ttc27	Tipin	0.999999	1		Timp3
		Tex19.1	E130012A19Rik	0.999999	1		Timp2
		Xpot	Dppa4	0.999999	1		Sdad1
		Tmx1	Itm2c	0.999999	1		Senp7
		2700097O09Rik	Dppa4	0.999999	1		Senp3
		2700097O09Rik	Sap30	0.999999	1		Efna1
		Chchd4	Tipin	0.999999	1		4933426M11Rik
		Rfc5	Dppa4	0.999999	1		Fbxo4
		Rfc5	Gpn1	0.999999	1		Fbxo5
		Rap2c	Sepn1	0.999999	1		Pla2g7
		Rap2c	Parva	0.999999	1		Gtf2f1
		Rap2c	Lrp10	0.999999	1		Terf1
		Prmt3	Rrn3	0.999999	1		Lpgat1
		Zswim1	Dppa4	0.999999	1		Stx4a
		Wdr77	Phf5a	0.999999	1		Tusc3
		Dhx16	Ppan	0.999999	1		Pcyox1
		Dhx16	E130012A19Rik	0.999999	1		Csf1
		Dhx16	Zfp296	0.999999	1		Appl2
		1500011H22Rik	Clic1	0.999999	1		Letmd1
		Ddx39	Wdr77	0.999999	1		Nptn
		Rpa1	Helb	0.999999	1		Rab11a
		Rpa1	Wdr74	0.999999	1		Osbpl9
		Rpa1	Dhodh	0.999999	1		Cfdp1
		Rpa1	Ttc27	0.999999	1		Ppp3ca
		Rpa1	Xpot	0.999999	1		Zfp740
		Rpa1	2700097O09Rik	0.999999	1		Ogfr
		Rpa1	Samm50	0.999999	1		Osbpl5
		Wls	Tdrd7	0.999999	1		Rab34
		Wls	Lrp10	0.999999	1		Stx7
		Wls	Tmx1	0.999999	1		Mgat4b
		Mki67ip	Ppan	0.999999	1		Smn1
		Mki67ip	Grwd1	0.999999	1		Tnfaip1
		Mki67ip	Srrt	0.999999	1		Mfhas1
		Mki67ip	Rrs1	0.999999	1		Avpi1
		Mki67ip	Wdr77	0.999999	1		C330027C09Rik
		Rnmt	Ddx10	0.999999	1		AI314976
		Lsm3	Phf5a	0.999999	1		Spp1
		Ube2t	Syce2	0.999999	1		Gnl3
		Syap1	Pttg1ip	0.999999	1		Atox1
		8430410A17Rik	Tipin	0.999999	1		Aldh3a2
		Eef1d	Csda	0.999999	1		Thbs1
		Eef1d	Sap30	0.999999	1		Zfp362
		Eef1d	Tipin	0.999999	1		Exosc9
		Eef1d	Mrpl18	0.999999	1		Exosc2
		Snx9	Clic1	0.999999	1		Exosc7
		Snx9	Itm2c	0.999999	1		Exosc5
		Trim13	Helb	0.999999	1		Zfp566
		Trim13	Dppa3	0.999999	1		Sema3e
		Trim13	Zswim1	0.999999	1		Arhgef16
		Lars	Gars	0.999999	1		Enpp5
		2810004N23Rik	Ddx39	0.999999	1		Enpp2
		Rsl1d1	Ttc27	0.999999	1		Gart
		Dpy30	Fastkd5	0.999999	1		Pja2
		Dpy30	Pcolce2	0.999999	1		Gars
		Dpy30	Tipin	0.999999	1		Asxl1
		Dpy30	Rfc5	0.999999	1		Nup93
		Dpy30	Samm50	0.999999	1		Syap1
		Dpy30	Eef1d	0.999999	1		Arid3a
		Nip7	Phf5a	0.999999	1		Arf1
		Nip7	Dhx16	0.999999	1		Arf4
		Nip7	Mki67ip	0.999999	1		Jmjd1c
		Nip7	Mrpl18	0.999999	1		2610305D13Rik
		Znrd1	Mki67ip	0.999999	1		Ghr
		Znrd1	8430410A17Rik	0.999999	1		Mta3
		Znrd1	Dpy30	0.999999	1		Ppp4c
		Sarnp	Sap30	0.999999	1		Pdcd4
		Bag2	Phldb2	0.999999	1		AU040320
		Bag2	Lrp10	0.999999	1		Pdcd2
		Bag2	Usp47	0.999999	1		Lgals3bp
		Bag2	Rap2c	0.999999	1		Nanog
		Bag2	Wls	0.999999	1		Ssrp1
		Bag2	Snx9	0.999999	1		Atp6v1g1
		Sult4a1	Helb	0.999999	1		Adsl
		Rbms2	Plekhh1	0.999999	1		Uhrf1
		Rbms2	Tspan9	0.999999	1		Pdgfa
		Gabarap	Sirt2	0.999999	1		Pdgfc
		Actl6a	Rpa1	0.999999	1		Elac2
		Ftsj3	Rrp12	0.999999	1		Haus4
		Ftsj3	Wdr74	0.999999	1		Nars
		Ftsj3	Noc4l	0.999999	1		Haus1
		Ftsj3	Srrt	0.999999	1		Bin1
		Ftsj3	Sap30	0.999999	1		Sin3a
		Ftsj3	Rrn3	0.999999	1		Strbp
		Ftsj3	Gpn1	0.999999	1		Psph
		Ftsj3	Psmd12	0.999999	1		Pdcd11
		Psmg1	Tipin	0.999999	1		Gpatch4
		Psmg1	Ttc27	0.999999	1		Wdhd1
		Psmg1	Rpa1	0.999999	1		Gpa33
		Stard10	Lrp10	0.999999	1		Efs
		Crlf3	Rpa1	0.999999	1		Hddc2
		Sh3glb1	Lrp10	0.999999	1		Nip7
		Sh3glb1	Rbms1	0.999999	1		Cdc20
		Mkrn1	Dppa4	0.999999	1		Cln6
		Mkrn1	Helb	0.999999	1		2810432D09Rik
		Dnmt3l	Noc3l	0.999999	1		Uckl1
		Dnmt3l	Dppa3	0.999999	1		Slc16a1
		Dnmt3l	Chchd4	0.999999	1		Ppan
		Dnmt3l	Zmym1	0.999999	1		Tor3a
		Dnmt3l	8430410A17Rik	0.999999	1		Pam
		Elovl1	Pttg1ip	0.999999	1		Wdr26
		Elovl1	Tdrd7	0.999999	1		Mfge8
		Elovl1	Tspan9	0.999999	1		Ugdh
		Elovl1	Lass2	0.999999	1		Asb8
		Elovl1	Dnajc14	0.999999	1		Nkrf
		Elovl1	Kdelr1	0.999999	1		Furin
		Elovl1	Snx9	0.999999	1		Mycn
		Elovl1	Ctsz	0.999999	1		Ydjc
		Arhgef5	Lrp10	0.999999	1		Ppa2
		Uba2	Polr2h	0.999999	1		Ppa1
		Uba2	Gpn1	0.999999	1		Eif4a3
		Uba2	Ttc27	0.999999	1		Hp1bp3
		Uba2	Xpot	0.999999	1		Ripk4
		Uba2	Wdr77	0.999999	1		1810035L17Rik
		Uba2	Snx5	0.999999	1		Dnmt3b
		Uba2	Samm50	0.999999	1		Ngfrap1
		Hpcal1	Tmem66	0.999999	1		Tet2
		Chek2	Polr2h	0.999999	1		Apbb1
		Chek2	Actl6a	0.999999	1		Tars
		Fbxo15	Zfp296	0.999999	1		Anapc2
		Gnl3	Polr2h	0.999999	1		Peg10
		Gnl3	Rrp12	0.999999	1		Rab23
		Gnl3	Fastkd5	0.999999	1		Rhoq
		Gnl3	Nop58	0.999999	1		Rhou
		Gnl3	Ttc27	0.999999	1		Dnajc14
		Gnl3	Wdr43	0.999999	1		Dnajc15
		Gnl3	Rpa1	0.999999	1		Myeov2
		Gnl3	Ftsj3	0.999999	1		Pitpnc1
		Abt1	Ppan	0.999999	1		Rhoc
		Timm10	Wdr74	0.999999	1		Rhob
		Timm10	Rrn3	0.999999	1		6530401D17Rik
		Timm10	Dpy30	0.999999	1		Gnai3
		Timm10	Sssca1	0.999999	1		Fut8
		Timm10	Nip7	0.999999	1		Efemp2
		Pmm1	Dppa4	0.999999	1		Slc2a3
		Limd1	Trio	0.999999	1		G6pc3
		Nr0b1	Polr2h	0.999999	1		2810474O19Rik
		Nr0b1	Slc29a1	0.999999	1		Ddx51
		Nr0b1	Zfp296	0.999999	1		Papss1
		Nr0b1	Rrn3	0.999999	1		Upp1
		Nr0b1	Zswim1	0.999999	1		Plcb4
		Nr0b1	Dpy30	0.999999	1		Hsph1
		Nr0b1	Psmg1	0.999999	1		Enah
		Nr0b1	Chek2	0.999999	1		2610029G23Rik
		Mrpl15	Dhx16	0.999999	1		Slc25a5
		Mrpl15	Uba2	0.999999	1		Npc2
		Abca3	Pttg1ip	0.999999	1		Npc1
		Abca3	Clic1	0.999999	1		Acot9
		Abca3	Parva	0.999999	1		Lamc2
		Abca3	Itm2c	0.999999	1		Acot7
		Abca3	Elovl1	0.999999	1		AI467606
		Ecsit	Dnmt3l	0.999999	1		Mid1ip1
		Banf1	Eef1d	0.999999	1		Gas6
		Klf6	Trio	0.999999	1		Actn3
		Twf2	Zswim1	0.999999	1		Actn1
		Amfr	Elovl1	0.999999	1		Rac1
		Amfr	Klf6	0.999999	1		Ppp5c
		Ash2l	Zswim1	0.999999	1		Nle1
		Ash2l	Dhx16	0.999999	1		Lyar
		Msh6	Tipin	0.999999	1		Kdm3a
		Ruvbl2	Rpa1	0.999999	1		Mrpl36
		Hspa4	Wdr77	0.999999	1		Tdh
		Hspa4	Uba2	0.999999	1		Ppil1
		Ngfrap1	Elovl1	0.999999	1		Zfp819
		Slc7a7	Dppa4	0.999999	1		Pycr2
		Sdcbp	Tmx1	0.999999	1		Gata3
		Vamp8	Clic1	0.999999	1		Nup88
		Vamp8	Osbpl9	0.999999	1		Src
		Vamp8	Usp47	0.999999	1		1110002N22Rik
		Vamp8	Rap2c	0.999999	1		Lap3
		Vamp8	Tmem66	0.999999	1		Sri
		Vamp8	Ctsz	0.999999	1		Timeless
		Vamp8	Gabarap	0.999999	1		Nup85
		Vamp8	Stard10	0.999999	1		Srm
		Vamp8	Stx7	0.999999	1		Axl
		Vamp8	Abca3	0.999999	1		Rasgrp2
		Vamp8	Ngfrap1	0.999999	1		Api5
		Copa	Acbd3	0.999999	1		Hmgn3
		Copa	Rbms2	0.999999	1		Trp53inp2
		Bop1	Rfc5	0.999999	1		Actc1
		Rasgrp2	Dpy30	0.999999	1		Ccnd1
		Mbd2	Elovl1	0.999999	1		2610528J11Rik
		Mrpl40	Tipin	0.999999	1		Specc1
		Sgce	Clic1	0.999999	1		Fastkd5
		Sgce	Spg20	0.999999	1		Srsf1
		Sgce	Itm2c	0.999999	1		Lox
		Sgce	Kdelr1	0.999999	1		Eef1e1
		Sgce	Bag2	0.999999	1		Trim13
		Sgce	Gabarap	0.999999	1		Smad4
		Sgce	Phc2	0.999999	1		Smad6
		Sgce	Klf6	0.999999	1		Jun
		Sgce	Fhl2	0.999999	1		Zfp36
		Orc1	Nup107	0.999999	1		Atp6ap2
		Orc1	Rpa1	0.999999	1		Tceal8
		Orc1	Crlf3	0.999999	1		Sfrp2
		Orc1	Ruvbl2	0.999999	1		Ahsa1
		Orc2	Dppa4	0.999999	1		Naa38
		Orc2	Rrp12	0.999999	1		Tle4
		Orc2	Tipin	0.999999	1		Ralgds
		Orc2	Ftsj3	0.999999	1		Ctps
		Orc2	Gnl3	0.999999	1		Grk6
		Orc2	Orc5	0.999999	1		Rabggtb
		Orc2	Bop1	0.999999	1		Atp9a
		Ltbp4	Zfp296	0.999999	1		Elovl1
		Ltbp4	Fbxo15	0.999999	1		Tgfb1i1
		Ifrd2	Srrt	0.999999	1		Casp6
		Ifrd2	Ftsj3	0.999999	1		Triobp
		Cyba	Elovl1	0.999999	1		Gnb4
		Cyba	Sgce	0.999999	1		Gnb2
		Emg1	Rrn3	0.999999	1		Ube2t
		Emg1	Tipin	0.999999	1		Acadvl
		Tagln2	Flnb	0.999999	1		2410007B07Rik
		Tagln2	Clic1	0.999999	1		Aimp1
		Tagln2	Tmbim1	0.999999	1		Dcaf13
		Cbr3	Helb	0.999999	1		S100g
		Itm2b	Gabarap	0.999999	1		Elp3
		Gsta4	Psmg1	0.999999	1		Carhsp1
		Gsta4	Mkrn1	0.999999	1		Tgfbr3
		Gsta4	Mrpl15	0.999999	1		1500012F01Rik
		Gstm5	Bag2	0.999999	1		2410004B18Rik
		Ugdh	Mcfd2	0.999999	1		Akap2
		Bcat2	Tipin	0.999999	1		Trp53
		Bcat2	Ttc27	0.999999	1		Sephs2
		Bcat2	Nr0b1	0.999999	1		Akap8
		Utf1	Trim13	0.999999	1		Rps6
		Cacybp	Polr2h	0.999999	1		Rps5
		Cacybp	Ppan	0.999999	1		Rps3
		Cacybp	2700097O09Rik	0.999999	1		Zfp513
		Cacybp	8430410A17Rik	0.999999	1		Sdf2
		Cacybp	Actl6a	0.999999	1		Pprc1
		Cacybp	Mad2l1	0.999999	1		Ets2
		Cacybp	Ftsj3	0.999999	1		Lamp1
		Cacybp	Crlf3	0.999999	1		Ets1
		Cacybp	Uba2	0.999999	1		Pafah1b3
		Cacybp	Chek2	0.999999	1		Ccdc101
		Cacybp	Fbxo15	0.999999	1		P4hb
		Cacybp	Ruvbl2	0.999999	1		Gab1
		Nit2	Helb	0.999999	1		Hspe1
		Nit2	Psmg1	0.999999	1		Itgb5
		Nit2	Msh6	0.999999	1		Itgb7
		Nit2	Gsta4	0.999999	1		Tsr1
		Haus4	Tipin	0.999999	1		Pbx2
		Birc5	Phf5a	0.999999	1		Pigp
		Birc5	3200002M19Rik	0.999999	1		Dyrk3
		Birc5	Eef1d	0.999999	1		Optn
		Birc5	Nip7	0.999999	1		Cad
		Anxa3	Phc2	0.999999	1		Ulk2
		Wisp1	Axl	0.999999	1		Zp3
		Pipox	Helb	0.999999	1		Yif1a
		Tcea3	Dnmt3l	0.999999	1		Tram1
		Tcea3	Ltbp4	0.999999	1		Tmx1
		Tcea3	Gsta4	0.999999	1		Ifi30
		Zcchc10	Ccnb1ip1	0.999999	1		Sec11a
		Zcchc10	Sap30	0.999999	1		Spg20
		Zcchc10	2810026P18Rik	0.999999	1		Maged1
		Zcchc10	Dhx16	0.999999	1		Scarb1
		Zcchc10	Snx5	0.999999	1		Kitl
		Zcchc10	Crlf3	0.999999	1		Mgat1
		Zcchc10	Uba2	0.999999	1		Naga
		Zcchc10	Fbxo15	0.999999	1		Csda
		Zcchc10	Gnl3	0.999999	1		Efha1
		Zcchc10	Cacybp	0.999999	1		Nagk
		Ilk	Sepn1	0.999999	1		Rps4y2
		Ilk	Maged2	0.999999	1		Lphn1
		Ilk	Lrp10	0.999999	1		Llgl2
		Ilk	Rap2c	0.999999	1		Noc3l
		Ilk	Wwtr1	0.999999	1		Tbcb
		Ilk	Kdelr1	0.999999	1		Tmem49
		Ilk	Bag2	0.999999	1		Trim2
		Ilk	Rbms2	0.999999	1		Pga5
		Ilk	Rbms1	0.999999	1		Tmem43
		Ilk	Stard10	0.999999	1		Trim6
		Ilk	Klf6	0.999999	1		Foxp1
		Ilk	Amfr	0.999999	1		Nr0b1
		Ilk	Tagln2	0.999999	1		Prps1
		Tbrg1	Rbms2	0.999999	1		Cbfa2t2
		Slc7a3	Polr2h	0.999999	1		Col5a2
		Slc7a3	Dppa4	0.999999	1		Col5a1
		Slc7a3	Rrp12	0.999999	1		1110008L16Rik
		Slc7a3	Sap30	0.999999	1		Rab11fip5
		Slc7a3	Dhodh	0.999999	1		Cd81
		Slc7a3	Dnajc7	0.999999	1		Ssbp3
		Slc7a3	Ttc27	0.999999	1		Trpc4ap
		Slc7a3	Rfc5	0.999999	1		Pfdn4
		Slc7a3	Ipo5	0.999999	1		Gadd45a
		Slc7a3	Slc7a7	0.999999	1		Cyb5
		Slc7a3	Gsta4	0.999999	1		Dynlt3
		Slc7a3	Dnmt3b	0.999999	1		Qtrt1
		Mre11a	Gnl3	0.999999	1		Sct
		Mfhas1	Klf6	0.999999	1		Gtse1
		Tcl1	Slc7a3	0.999999	1		Tcf12
		Pold2	Nr0b1	0.999999	1		Crmp1
		Calu	Pttg1ip	0.999999	1		Ptbp1
		Calu	Tmx1	0.999999	1		Arl2bp
		Calu	Kdelr1	0.999999	1		Chchd4
		Calu	Nek6	0.999999	1		Clp1
		Calu	Elovl1	0.999999	1		Epha2
		Calu	Copa	0.999999	1		Tmem9b
		Calu	Sgce	0.999999	1		Lats2
		Phlda1	Mcfd2	0.999999	1		Tagln2
		Etv5	Slc7a7	0.999999	1		Ranbp1
		Cirh1a	Ppan	0.999999	1		Ppm1g
		Cirh1a	Wdr74	0.999999	1		Gclm
		Cirh1a	Ftsj3	0.999999	1		Rpl8
		Cirh1a	Hspa4	0.999999	1		Ccne1
		Tex264	Pttg1ip	0.999999	1		Aldh2
		Atp6ap1	Itm2c	0.999999	1		Dek
		Atp6ap1	Kdelr1	0.999999	1		Ikbkg
		Atp6ap1	Elovl1	0.999999	1		Trim28
		Atp6ap1	Vamp8	0.999999	1		3200002M19Rik
		Tuft1	Stx7	0.999999	1		Hs3st1
		Wbp5	Wls	0.999999	1		Clpp
		Wbp5	Bag2	0.999999	1		Trim27
		Wbp5	Stard10	0.999999	1		Hprt
		Wbp5	Tuft1	0.999999	1		Txndc12
		Tuba4a	Rrn3	0.999999	1		Fhl2
		Tuba4a	Rfc5	0.999999	1		Fhl1
		Tuba4a	Slc7a3	0.999999	1		Sart3
		Hp1bp3	Syap1	0.999999	1		Tes
		Mapkapk2	Cmtm3	0.999999	1		Ryk
		Mapkapk2	Itm2c	0.999999	1		Psmd14
		Mapkapk2	Bag2	0.999999	1		Psmd12
		Mapkapk2	Amfr	0.999999	1		Espl1
		Mapkapk2	Sgce	0.999999	1		Tmem14c
		Trim28	Zfp532	0.999999	1		Pcbd1
		Trim28	Rrp9	0.999999	1		Calml4
		Trim28	Sdad1	0.999999	1		Rsl1d1
		Trim28	Csda	0.999999	1		Jak2
		Trim28	Tipin	0.999999	1		Mdm2
		Trim28	Ftsj3	0.999999	1		Arfgap3
		Trim28	Dnmt3l	0.999999	1		2310003C23Rik
		Trim28	Uba2	0.999999	1		Arfgap1
		Trim28	Fiz1	0.999999	1		Sssca1
		Trim28	Eftud2	0.999999	1		Sc4mol
		Trim28	Bop1	0.999999	1		Bmp2
		Trim28	Utf1	0.999999	1		Bmp1
		Trim28	Pole	0.999999	1		Farp1
		Cpt2	Papss1	0.999999	1		Myo1d
		Cited1	Clic1	0.999999	1		Myo1b
		Cited1	Lrp10	0.999999	1		Tdgf1
		Cited1	Cldn6	0.999999	1		4930506M07Rik
		Cited1	Ngfrap1	0.999999	1
		Laptm4a	Mcfd2	0.999999	1
		Laptm4a	Sgce	0.999999	1
		Rhob	Parm1	0.999999	1
		Rhob	Mtap7d1	0.999999	1
		Rhob	Clic1	0.999999	1
		Rhob	Tmx1	0.999999	1
		Rhob	Wls	0.999999	1
		Rhob	Kdelr1	0.999999	1
		Rhob	Abca3	0.999999	1
		Rhob	Cyba	0.999999	1
		Ezh2	Cacybp	0.999999	1
		Sqstm1	Sdcbp	0.999999	1
		Exosc5	Rfc5	0.999999	1
		Myo10	Helb	0.999999	1
		Myo10	Slc7a3	0.999999	1
		Myo10	Etv5	0.999999	1
		Lyar	Ppan	0.999999	1
		Lyar	Fastkd5	0.999999	1
		Lyar	Ddx10	0.999999	1
		Lyar	Chchd4	0.999999	1
		Lyar	Rpa1	0.999999	1
		Lyar	Rcl1	0.999999	1
		Lyar	Orc5	0.999999	1
		Lyar	Msh6	0.999999	1
		Lyar	Slc7a3	0.999999	1
		Lyar	Trim28	0.999999	1
		Lefty1	Pycr2	0.999999	1
		Cpd	Wls	0.999999	1
		Nsun2	Rrp9	0.999999	1
		Nsun2	Fastkd5	0.999999	1
		Nsun2	Rrn3	0.999999	1
		Nsun2	Ddx10	0.999999	1
		Nsun2	Gpn1	0.999999	1
		Nsun2	Ttc27	0.999999	1
		Nsun2	Chchd4	0.999999	1
		Nsun2	Ddx54	0.999999	1
		Nsun2	Rcc1	0.999999	1
		Nsun2	Rsl1d1	0.999999	1
		Nsun2	Ftsj3	0.999999	1
		Nsun2	Psmg1	0.999999	1
		Nsun2	Nasp	0.999999	1
		Nsun2	Nr0b1	0.999999	1
		Nsun2	Mrpl15	0.999999	1
		Nsun2	Bop1	0.999999	1
		Nsun2	Orc1	0.999999	1
		Nsun2	Stip1	0.999999	1
		Nsun2	Lyar	0.999999	1
		Zic3	Slc7a3	0.999999	1
		Eif3b	Wdr77	0.999999	1
		Tars	Xpot	0.999999	1
		Tars	Nsun2	0.999999	1
		D19Bwg1357e	Fastkd5	0.999999	1
		D19Bwg1357e	Gnl3	0.999999	1
		Hells	Polr2h	0.999999	1
		Hells	Csda	0.999999	1
		Hells	Rrn3	0.999999	1
		Hells	Snx5	0.999999	1
		Hells	Trim59	0.999999	1
		Hells	Actl6a	0.999999	1
		Hells	Mad2l1	0.999999	1
		Hells	Crlf3	0.999999	1
		Hells	Mkrn1	0.999999	1
		Hells	Nasp	0.999999	1
		Hells	Gsta4	0.999999	1
		Anxa5	Pttg1ip	0.999999	1
		Anxa5	Rell1	0.999999	1
		Anxa5	Snx9	0.999999	1
		Anxa5	Cyba	0.999999	1
		Anxa5	Anxa3	0.999999	1
		Anxa5	Rhob	0.999999	1
		Mcm2	Ung	0.999999	1
		Gpx3	Maged1	0.999999	1
		Gpx3	Lrp10	0.999999	1
		Gpx3	Plod3	0.999999	1
		Gpx3	Sdcbp	0.999999	1
		Cnn2	Ilk	0.999999	1
		Mtf2	Nr0b1	0.999999	1
		Mtf2	Msh6	0.999999	1
		Mtf2	Hells	0.999999	1
		Coil	Helb	0.999999	1
		Coil	Tipin	0.999999	1
		Coil	Slc7a3	0.999999	1
		Coil	Hells	0.999999	1
		Jarid2	Cirh1a	0.999999	1
		Peg3	Lrp10	0.999999	1
		Cct3	Bcat2	0.999999	1
		Cct3	Stip1	0.999999	1
		Man1a	Lrp10	0.999999	1
		Man1a	Calu	0.999999	1
		Soat1	Trio	0.999999	1
		Soat1	Lass2	0.999999	1
		Soat1	Wls	0.999999	1
		Soat1	Snx9	0.999999	1
		Soat1	Arhgef5	0.999999	1
		Soat1	Stx7	0.999999	1
		Soat1	Wbp5	0.999999	1
		Soat1	Tes	0.999999	1
		Tcf15	Tcof1	0.999999	1
		Tcf15	Ccnb1ip1	0.999999	1
		Tcf15	Polr2h	0.999999	1
		Tcf15	Dppa4	0.999999	1
		Tcf15	Rpa1	0.999999	1
		Tcf15	Dnmt3l	0.999999	1
		Tcf15	Gnl3	0.999999	1
		Tcf15	Slc7a7	0.999999	1
		Tcf15	Zcchc10	0.999999	1
		Tcf15	Nsun2	0.999999	1
		Pml	Helb	0.999999	1
		Pml	Nr0b1	0.999999	1
		Pdcd2	Nr0b1	0.999999	1
		Xrcc5	Helb	0.999999	1
		Xrcc5	Rrn3	0.999999	1
		Xrcc5	Ruvbl2	0.999999	1
		Xrcc5	Bcat2	0.999999	1
		Xrcc5	Zcchc10	0.999999	1
		Xrcc5	Tuba4a	0.999999	1
		Xrcc5	Trim28	0.999999	1
		Phc1	Ccnb1ip1	0.999999	1
		Phc1	Rrp12	0.999999	1
		Phc1	Tada2a	0.999999	1
		Phc1	Csda	0.999999	1
		Phc1	Arl6	0.999999	1
		Phc1	Dnajc21	0.999999	1
		Phc1	Rrn3	0.999999	1
		Phc1	Gpn1	0.999999	1
		Phc1	Rbpms2	0.999999	1
		Phc1	Ifitm1	0.999999	1
		Phc1	Actl6a	0.999999	1
		Phc1	Crlf3	0.999999	1
		Phc1	Uba2	0.999999	1
		Phc1	Slc27a2	0.999999	1
		Phc1	Slc7a7	0.999999	1
		Phc1	Upp1	0.999999	1
		Phc1	Tuba4a	0.999999	1
		Phc1	Lyar	0.999999	1
		Dsc2	Pdlim2	0.999999	1
		Dsc2	Itm2c	0.999999	1
		Dsc2	Wls	0.999999	1
		Adsl	Csda	0.999999	1
		Adsl	Rfc5	0.999999	1
		Adsl	Ftsj3	0.999999	1
		Adsl	Bcat2	0.999999	1
		Adsl	Cct5	0.999999	1
		Adsl	Cct3	0.999999	1
		Mcm4	Csda	0.999999	1
		Mcm4	Rrs1	0.999999	1
		Mcm4	Ddx10	0.999999	1
		Mcm4	Tipin	0.999999	1
		Mcm4	Actl6a	0.999999	1
		Mcm4	Uba2	0.999999	1
		Mcm4	Cacybp	0.999999	1
		Mcm4	Ezh2	0.999999	1
		Mcm4	Coil	0.999999	1
		Mcm5	Rrp9	0.999999	1
		Mcm5	Ppan	0.999999	1
		Mcm5	Rrp12	0.999999	1
		Mcm5	Kars	0.999999	1
		Mcm5	Noc3l	0.999999	1
		Mcm5	Dhodh	0.999999	1
		Mcm5	Rfc5	0.999999	1
		Mcm5	Ddx54	0.999999	1
		Mcm5	Nup93	0.999999	1
		Mcm5	Sult4a1	0.999999	1
		Mcm5	Ftsj3	0.999999	1
		Mcm5	Gnl3	0.999999	1
		Mcm5	Nr0b1	0.999999	1
		Mcm5	Mrpl15	0.999999	1
		Mcm5	Slc7a3	0.999999	1
		Mcm5	Etv5	0.999999	1
		Mcm5	Coil	0.999999	1
		Mcm5	Adsl	0.999999	1
		Efnb1	Cdc42ep1	0.999999	1
		Efnb1	Tspan9	0.999999	1
		Efnb1	Rbms1	0.999999	1
		Efnb1	Abca3	0.999999	1
		Efnb1	Amfr	0.999999	1
		Efnb1	Ngfrap1	0.999999	1
		Efnb1	Irx3	0.999999	1
		Efnb1	Mapkapk2	0.999999	1
		Efnb1	Peg3	0.999999	1
		Gng3	Akap12	0.999999	1
		Gng3	Nr0b1	0.999999	1
		Srm	Polr2h	0.999999	1
		Srm	Csda	0.999999	1
		Srm	Rrn3	0.999999	1
		Srm	Elac2	0.999999	1
		Srm	Ftsj3	0.999999	1
		Srm	Bcat2	0.999999	1
		Srm	Utf1	0.999999	1
		Srm	Lyar	0.999999	1
		Srm	Tcf15	0.999999	1
		H2afx	Lsm3	0.999999	1
		Pou5f1	Rrp9	0.999999	1
		Pou5f1	Polr2h	0.999999	1
		Pou5f1	Sdad1	0.999999	1
		Pou5f1	Apobec3	0.999999	1
		Pou5f1	Dhodh	0.999999	1
		Pou5f1	Zfp296	0.999999	1
		Pou5f1	Tdh	0.999999	1
		Pou5f1	Rfc5	0.999999	1
		Pou5f1	Zmym1	0.999999	1
		Pou5f1	Psmg1	0.999999	1
		Pou5f1	Crlf3	0.999999	1
		Pou5f1	Mkrn1	0.999999	1
		Pou5f1	Uba2	0.999999	1
		Pou5f1	Gnl3	0.999999	1
		Pou5f1	Bop1	0.999999	1
		Pou5f1	Cbr3	0.999999	1
		Pou5f1	Bcat2	0.999999	1
		Pou5f1	Etv5	0.999999	1
		Pou5f1	Tuba4a	0.999999	1
		Pou5f1	Tcf15	0.999999	1
		Pou5f1	Pml	0.999999	1
		Pla2g1b	Nr0b1	0.999999	1
		Pola1	Gsta4	0.999998	1
		Pola1	Cacybp	0.999998	1
		Prdx1	Rpa1	0.999998	1
		Etv4	E130012A19Rik	0.999998	1
		Zfp57	Sept1	0.999998	1
		Zfp42	Rpp25	0.999998	1
		Zfp42	Tipin	0.999998	1
		Zfp42	Lap3	0.999998	1
		Zfp42	Utf1	0.999998	1
		Zfp42	Mybl2	0.999998	1
[truncated: 20,127 more rows]

## Sheet: Mmu Top 60 Gene Exp
Mmu Top 60 Gene Expression Test Network
Data Compendium			Top Ranked Edges (≥ 0.9999)					Genes Involved in top edges			GO BP|KEGG Pathway Annotations from the Database for Annotation, Visualization and Integrated Discovery (DAVID), version 6.7
Dataset ID	Also in mESC Compendium		Gene1	Gene2	Posterior	Rank		≥ 0.9999	1		Term	Fold Enrichment	PValue	Genes	Count	%	Bonferroni	Benjamini	FDR
GDS1056	GDS1824		Tmbim4	Nt5m	1	1		Plekhg2	Tgfbr3		0 Chart Records
GDS1339	GDS2671		Mmd	Fndc3b	1	1		Ostm1	Nt5m
GDS1367	GDS2672		Tgfbr3	Lpp	1	1		Pcgf3	Lpp
GDS1446	GSE11523a		Mpi	Fam98c	0.999999	1		Pcmtd1	Mmd
GDS1529	GSE11660		Usp22	Akap13	0.999999	1		Ccdc104	Fndc3b
GDS1600	GSE2972b		Fndc3b	Rapgef2	0.999999	1		Fam149a	Tmbim4
GDS1657	GSE3223b		Fosl2	Pxdn	0.999999	1		Foxn3
GDS1658	GSE4189		Cald1	Bmpr1a	0.999998	1		Slc22a16
GDS168			Pdzrn3	Tns3	0.999998	1		Ccdc108
GDS169			2700081O15Rik	Zfp532	0.999998	1		Atxn1
GDS1716			2700081O15Rik	Usp22	0.999998	1		Nrip1
GDS1766			Bmpr1a	B230219D22Rik	0.999998	1		Apbb2
GDS1824			Sept11	Pxdn	0.999998	1		2810008M24Rik
GDS186			Bmpr2	Bmpr1a	0.999998	1		Dhx30
GDS1879			Cald1	Pdzrn3	0.999997	1		1700019D03Rik
GDS1880			Cald1	Parva	0.999997	1		Fyttd1
GDS1943			Cald1	Fndc3b	0.999997	1		4931406P16Rik
GDS1987			Nuak1	Pard3	0.999997	1		Tmem184b
GDS2028			Fndc3b	Nuak1	0.999997	1		Tmbim4
GDS2053			Plscr3	Farp1	0.999997	1		Ski
GDS2061			Nrip1	Bmpr1a	0.999997	1		Pbx4
GDS2178			Xiap	Rap2c	0.999997	1		Chst14
GDS2224			Cald1	Farp1	0.999996	1		1810043H04Rik
GDS2285			Bicc1	Creb3l2	0.999996	1		Crat
GDS2390			Katnb1	Morn4	0.999996	1		Cpt1b
GDS243			Fndc3b	Setd7	0.999996	1		Irak1bp1
GDS244			Pcbp3	Mapk8ip2	0.999996	1		Katnb1
GDS2483			Mpi	Nt5m	0.999995	1		Smad5
GDS249			Reep3	Fosl2	0.999995	1		Rnd2
GDS2524			Pxdn	Pdzrn3	0.999995	1		2700081O15Rik
GDS2662			Fat1	Zfp532	0.999995	1		Mpi
GDS2671			Pdzrn3	Rapgef2	0.999994	1		Klf7
GDS2672			Ypel1	Nt5m	0.999994	1		Rhbdf1
GDS2699			Tshz1	Pdzrn3	0.999994	1		Dyrk3
GDS2718			Bmpr1a	Hmgn3	0.999994	1		Neo1
GDS2949			Lyar	Mlf1ip	0.999994	1		Sept8
GDS2950			Atrx	Pcmtd1	0.999994	1		Mllt6
GDS384			Cald1	Mmd	0.999993	1		Pigy
GDS409			Frmd4a	Fam168b	0.999993	1		Vps37a
GDS45			Ndufaf3	Mad2l2	0.999993	1		Pacsin2
GDS48			Enah	Fat1	0.999993	1		6530401D17Rik
GDS50			Fosl2	Lhfpl2	0.999993	1		Phospho2
GDS51			Dyrk3	Lpin1	0.999992	1		Nfic
GDS52			Ski	Klf7	0.999991	1		Bace1
GDS522			Parva	Farp1	0.999991	1		Nfia
GDS578			Dcakd	Usp22	0.999991	1		Snx7
GDS58			Tm9sf3	B230219D22Rik	0.999991	1		Elk4
GDS606			Bmpr1a	Wls	0.999991	1		Kctd15
GDS607			Fat1	Tns3	0.999991	1		Zmynd8
GDS682			Cald1	Tns3	0.99999	1		Efemp2
GDS701			Usp22	Tns3	0.99999	1		Plp2
GDS868			Mmd	Pdzrn3	0.99999	1		Fbxo18
GDS878			Larp1b	Tdrd7	0.99999	1		Frmd4a
GDS912			Larp1b	Hcfc2	0.99999	1		Glg1
GDS949			Pla2g6	Morn4	0.99999	1		Odz4
GSE11523a			Dusp13	Tmc5	0.99999	1		Tmx1
GSE11660			Bmpr1a	Zfp260	0.99999	1		Pcbp3
GSE2972b			Oaf	Creb3l2	0.999989	1		Rnf126
GSE3223b			Spry2	Tns3	0.999989	1		Rfk
GSE4189			Bmpr1a	Map2k4	0.999989	1		Auts2
			Bmpr2	Rapgef2	0.999989	1		Mbnl2
			Fat1	Akap13	0.999989	1		Setx
			Cald1	Fosl2	0.999988	1		Cby1
			Ndufaf3	Tmbim4	0.999988	1		Cenpp
			Pla2g6	Nt5m	0.999988	1		Fam98c
			Xiap	Fndc3b	0.999988	1		Cxadr
			Prkci	Pcgf3	0.999987	1		Rcc2
			Prkci	Fat1	0.999987	1		Plcb4
			Fndc3b	Pdzrn3	0.999987	1		Plscr3
			Plscr3	2700081O15Rik	0.999987	1		2610030H06Rik
			Syap1	B230219D22Rik	0.999987	1		Sh3gl2
			Cenpp	Setx	0.999987	1		Enah
			Bmpr1a	Bhlhb9	0.999987	1		Arid2
			Mmd	Usp22	0.999986	1		Dcakd
			1700025K23Rik	Morn2	0.999986	1		Slc20a2
			Rbms2	Usp22	0.999986	1		Snx18
			Sox11	Nr2f2	0.999985	1		Ptprg
			Ndufaf3	Pomt1	0.999985	1		Tprn
			Bdp1	A230046K03Rik	0.999985	1		Sepn1
			Fat1	Zfp518b	0.999985	1		Rhobtb3
			Fat1	Pdzrn3	0.999985	1		Dppa4
			Enah	Zfp532	0.999985	1		Gramd4
			Lyar	Asrgl1	0.999985	1		Nudt18
			Rnf126	Morn4	0.999984	1		Myo10
			Tnfrsf12a	Mmd	0.999984	1		Dlc1
			Cast	Mbnl2	0.999984	1		Senp5
			Fat1	Dpysl2	0.999984	1		Zmpste24
			Lyar	Ttll5	0.999984	1		Smpdl3b
			Atp7a	Bmpr1a	0.999983	1		Tgfbr3
			Lrrc50	Morn4	0.999983	1		Dbndd1
			Fat1	Cnpy4	0.999983	1		Dpysl2
			Mpi	Asrgl1	0.999982	1		Tcf4
			Cald1	Bmpr2	0.999982	1		Lpin1
			Fndc3b	Frmd4a	0.999982	1		Camk2d
			Plscr3	Trib2	0.999982	1		Rbpj
			Rnf146	Kbtbd2	0.999982	1		Syap1
			Mmd	Setd7	0.999982	1		Gsk3b
			Bmpr2	Setd7	0.999982	1		Cog6
			Fat1	Rapgef2	0.999982	1		Cnpy4
			Fosl2	Apbb2	0.999982	1		Lyar
			Glt8d1	Nudt18	0.999981	1		Fosl2
			Lyar	Aven	0.999981	1		Trim2
			Sept8	Parva	0.99998	1		2410002O22Rik
			Cald1	Nuak1	0.99998	1		Pxdn
			Rfk	Rapgef2	0.99998	1		Ppap2b
			Bmpr1a	Pcgf3	0.99998	1		Mad2l2
			Arfip1	Bmpr1a	0.99998	1		Emilin1
			Ndst1	Tmem184b	0.99998	1		Rbfox2
			Dkkl1	Asrgl1	0.999979	1		Prmt2
			Efna5	Nuak1	0.999979	1		Mn1
			Prkci	Zfp518b	0.999978	1		Sun5
			Fmnl2	Hmgn3	0.999978	1		Rab32
			Hcfc2	Arhgap29	0.999978	1		Irs1
			Senp7	Syap1	0.999978	1		Zfp260
			Nek6	Farp1	0.999978	1		Ppil1
			Kif3b	Pcbp3	0.999978	1		Alg10b
			Kif3b	Cpt1b	0.999978	1		Exd2
			Lyar	Dkkl1	0.999978	1		Trib2
			Pml	Odz4	0.999978	1		Rod1
			Prkar2b	Fmnl2	0.999977	1		Mmd
			2700081O15Rik	Chsy1	0.999977	1		Fndc3b
			Camk2d	Nr2f2	0.999977	1		Cklf
			Flt1	Lpp	0.999976	1		Mex3c
			Bmpr1a	Tm9sf3	0.999976	1		Arfip1
			Gnb4	Mmd	0.999976	1		Magt1
			Fosl2	Lhfp	0.999976	1		Nek6
			Mpi	Ndufaf3	0.999975	1		B230219D22Rik
			Cald1	Tcf7l2	0.999975	1		Slc40a1
			Fndc3b	Tns3	0.999975	1		Hs2st1
			Mmd	Gramd4	0.999975	1		Hspa2
			Fosl2	Plscr3	0.999975	1		Larp1b
			Ski	2700081O15Rik	0.999974	1		Wls
			Pcbp3	Asrgl1	0.999974	1		Rbpms2
			Pla2g6	Mad2l2	0.999974	1		Ttyh1
			Kif3b	Itpk1	0.999974	1		Tcf7l2
			Fosl2	Nuak1	0.999974	1		Myl6
			Cald1	Setd7	0.999973	1		Trio
			Dync1li1	Tns3	0.999973	1		Rassf8
			Nuak1	Farp1	0.999973	1		Dkkl1
			Pcgf3	Senp5	0.999973	1		Ung
			Ddx20	Lpin1	0.999973	1		Reep3
			Tshz1	Fndc3b	0.999973	1		Sept11
			Fat1	2700081O15Rik	0.999973	1		Tmem2
			Fosl2	Chsy1	0.999973	1		Hmgn3
			Reep3	Mbnl2	0.999972	1		Oscp1
			1110012L19Rik	Poglut1	0.999972	1		Hirip3
			Efna5	Neo1	0.999972	1		Cast
			Ets2	Gnb4	0.999971	1		Sox11
			Ptprg	Fosl2	0.99997	1		Tshz1
			Snx18	Tns3	0.99997	1		Tdrd7
			Nuak1	Mbnl2	0.99997	1		Banf2
			Ehmt1	Usp22	0.99997	1		Pask
			Rnaseh2b	6530401D17Rik	0.99997	1		Ngly1
			Magt1	Rap2c	0.99997	1		Pard6g
			Morc1	Ctnnal1	0.99997	1		Xiap
			Fosl2	Rbms2	0.99997	1		Pou5f1
			Tgfbr2	Fosl2	0.999969	1		1700025K23Rik
			Rbpj	Bmpr1a	0.999969	1		Rbms2
			Gpr160	Aven	0.999969	1		Jag2
			Mmd	Nuak1	0.999969	1		Wfdc3
			Ndufaf3	Katnb1	0.999969	1		Cald1
			Slit2	Lhfpl2	0.999969	1		Bicd2
			Arfip1	Slc35f5	0.999969	1		Adamts5
			Hn1l	Ppil1	0.999969	1		Slc35f5
			Fat1	Plscr3	0.999969	1		Nenf
			Elk4	Tns3	0.999969	1		Hcfc2
			Cald1	Fam149a	0.999968	1		Oaf
			Cald1	Trib2	0.999968	1		1700019E19Rik
			Pomt1	Ift140	0.999968	1		Hmg20a
			Pxdn	Parva	0.999968	1		Psrc1
			Bmpr2	Syap1	0.999968	1		Pard6b
			Pcbp3	Ypel1	0.999967	1		AA467197
			Adamts5	Rhobtb3	0.999967	1		Hn1l
			Bmpr1a	Nuak1	0.999967	1		2610528E23Rik
			E2f3	Bmpr1a	0.999967	1		Bmpr2
			Prkci	Snrk	0.999966	1		Osbpl3
			Mpi	Tmbim4	0.999966	1		Aven
			B230219D22Rik	Alg10b	0.999966	1		Smad3
			Glg1	Zfp518b	0.999966	1		Sema6d
			Tgfbr2	Mfhas1	0.999965	1		Pdzrn3
			Tcf7l2	Tns3	0.999965	1		Ttll5
			Smad3	Rap2c	0.999965	1		Rap2c
			Fat1	Bhlhb9	0.999965	1		Morc1
			Glg1	Fat1	0.999965	1		Rwdd2a
			Prkci	Tns3	0.999964	1		Zfp532
			Nuak1	Lhfpl2	0.999964	1		Nuak1
			Cald1	Ets2	0.999963	1		1810027O10Rik
			Asrgl1	Cklf	0.999963	1		Zfp518b
			Pcbp3	Pbx4	0.999963	1		Lrrc50
			Ctnnal1	Smpdl3b	0.999963	1		Chsy1
			Rpl6	Rpl8	0.999963	1		Poglut1
			Fosl2	Myl6	0.999963	1		Lats1
			Atp7a	Syap1	0.999962	1		Prkar2b
			Reep3	Mfhas1	0.999962	1		Arhgap10
			Nt5m	Cby1	0.999962	1		Dtna
			Bmpr1a	Slc9a6	0.999962	1		Tns3
			Prmt2	Bace1	0.999962	1		Atrx
			Cast	Fndc3b	0.999962	1		Parva
			Fosl2	Tns3	0.999962	1		Snrk
			Bmpr1a	Fndc3b	0.999961	1		Dusp13
			Cpt1b	Dkkl1	0.999961	1		Rnf146
			Trim28	Dhx30	0.999961	1		St3gal2
			Myo10	Fat1	0.999961	1		Slc9a6
			Cd44	Reep3	0.99996	1		Zdhhc20
			Chsy1	Zfp532	0.99996	1		Ypel1
			Qtrtd1	Zfp532	0.99996	1		Uchl5
			Syap1	Wls	0.99996	1		Rpl8
			Mpi	Nudt18	0.999959	1		Rpl6
			Rab35	Gramd4	0.999959	1		Pbp2
			Rnf126	Aven	0.999959	1		Insl6
			2210013O21Rik	Trib2	0.999959	1		Lrrc34
			Ndufaf3	4930455F23Rik	0.999959	1		Rpl3
			Prkd1	Lrrk1	0.999958	1		Bicc1
			Ndufaf3	Cog6	0.999958	1		Ccnt1
			Nrip1	Fam168b	0.999958	1		Immp2l
			Ung	Rcc2	0.999958	1		Slit2
			Hirip3	Setx	0.999957	1		Txnrd3
			Pacsin2	Tmx1	0.999957	1		Pdcd11
			Ndst1	Mmd	0.999957	1		Lcor
			Pask	Tcfl5	0.999956	1		Nt5m
			Frmd4a	Setd7	0.999956	1		Arhgap29
			1700025K23Rik	Morn4	0.999956	1		Prkd1
			Cpt1b	Pcbp3	0.999956	1		Flt1
			Jag2	Nt5m	0.999956	1		Ift140
			Tgfbr3	Gsk3b	0.999956	1		Rabl5
			Rod1	Wdr26	0.999955	1		Trim28
			Elk4	Hmgn3	0.999955	1		Senp7
			Prkar2b	Tshz1	0.999954	1		4930455F23Rik
			Mbnl2	Rapgef2	0.999954	1		Efna5
			Nuak1	Parm1	0.999954	1		Tcfl5
			Fndc3b	Arhgap10	0.999954	1		Lrrc8d
			Bmpr2	Fndc3b	0.999954	1		Tbc1d10b
			Pml	Rbpms2	0.999954	1		Tmc5
			Plekhg2	Lzts2	0.999953	1		Mfhas1
			Tcf7l2	Wls	0.999953	1		Chd1l
			Bmpr2	Mex3c	0.999953	1		1110012L19Rik
			Gprasp1	Kbtbd2	0.999952	1		Akap13
			Wls	Kbtbd2	0.999952	1		Fhl4
			Cald1	Lhfpl2	0.999951	1		Bdp1
			Nt5m	Mad2l2	0.999951	1		Pml
			Asrgl1	Morn4	0.999951	1		Asrgl1
			Tcf7l2	Trib2	0.999951	1		Bhlhb9
			Cast	Mfhas1	0.999951	1		Pdcl2
			Bmpr2	Pdzrn3	0.999951	1		Mapk8ip2
			Efna5	Nr2f2	0.999951	1		Ehmt1
			Tgfbr2	Pdzrn3	0.99995	1		Morn4
			Usp22	Sema6d	0.99995	1		Qtrtd1
			Ttyh1	1110012J17Rik	0.99995	1		Pard3
			Dkkl1	AA467197	0.99995	1		Lrrk1
			Bmpr1a	Syap1	0.99995	1		2310003C23Rik
			Fat1	Hn1l	0.99995	1		Morn2
			Apbb2	Mmd	0.99995	1		Gnb4
			Sox2	Pou5f1	0.999949	1		1110012J17Rik
			Dbndd1	Morn4	0.999949	1		Sertad2
			Plscr3	Setd7	0.999949	1		Pla2g6
			Cxadr	Syap1	0.999948	1		Gpr108
			Nfia	Tcf7l2	0.999948	1		Tm9sf3
			Ndufaf3	Irak1bp1	0.999947	1		Vgll3
			Pacsin2	Zmpste24	0.999947	1		E2f3
			Fosl2	Fndc3b	0.999947	1		Dusp7
			Prkar2b	Fam168b	0.999946	1		Tnfrsf12a
			Cald1	Cd44	0.999946	1		Usp22
			Pvrl3	Hook2	0.999946	1		Btbd3
			Syap1	Slc35f5	0.999946	1		Thoc5
			Psrc1	Smpdl3b	0.999946	1		Tmem38a
			St3gal2	Fosl2	0.999945	1		Wdr26
			Gltpd1	Nudt18	0.999945	1		Ddx20
			Lrrc8d	Gramd4	0.999945	1		Fam168b
			Mllt10	Setx	0.999945	1		Rnaseh2b
			Slc40a1	Trib2	0.999945	1		Hook2
			Vps37a	Lcor	0.999945	1		Lzts2
			Nfia	Frmd4a	0.999945	1		Trim37
			Rhbdf1	AW555464	0.999945	1		Mllt10
			Elk4	2210013O21Rik	0.999945	1		Nr2f2
			Ski	Tns3	0.999944	1		Nfib
			Pcbp3	Morn4	0.999944	1		Spry2
			Sept11	Odz4	0.999944	1		Lhfp
			Oaf	Rassf8	0.999943	1		Gltpd1
			Larp1b	Phospho2	0.999943	1		Ndufaf3
			Arfip1	Senp5	0.999943	1		Map2k4
			Pdzrn3	Farp1	0.999942	1		Mlf1ip
			Pacsin2	Map2k4	0.999942	1		Kif3b
			Rnd2	Ppil1	0.999942	1		Parm1
			Lyar	Ccdc104	0.999942	1		Itpk1
			Prkci	Syap1	0.999941	1		Prkci
			Oaf	Rbms2	0.999941	1		Tgfbr2
			Mmd	Farp1	0.999941	1		Ppm1l
			Insl6	Lrrc50	0.999941	1		1700019N12Rik
			Pacsin2	Snx7	0.999941	1		2210013O21Rik
			Bmpr1a	Kbtbd2	0.999941	1		Slc38a4
			Bmpr1a	Pdzrn3	0.999941	1		Fmnl2
			Efna5	Mn1	0.999941	1		Ndst1
			Prkci	Kbtbd2	0.99994	1		Ilk
			Cald1	Prkd1	0.99994	1		Lpp
			Rpl6	Rpl3	0.99994	1		Elovl1
			Irs1	Wls	0.999939	1		Bmpr1a
			Cald1	Zfp260	0.999939	1		Pvrl3
			Cklf	AA467197	0.999939	1		Sbf2
			Pdcd11	Zfp532	0.999939	1		A230046K03Rik
			Cast	Lhfpl2	0.999939	1		Glt8d1
			Nfib	Tmem2	0.999939	1		Pomt1
			Hspa2	Dkkl1	0.999938	1		Ctnnal1
			Zdhhc20	A230046K03Rik	0.999938	1		Lhfpl2
			Zmynd8	Trio	0.999938	1		Creb3l2
			Ndufaf3	Oscp1	0.999938	1		Rrp8
			Ptprg	Enah	0.999937	1		Rab35
			Setd7	Pdzrn3	0.999937	1		Zfp948
			Bmpr1a	Slc35f5	0.999937	1		Kbtbd2
			Hspa2	Fhl4	0.999936	1		Farp1
			Pard6g	Lzts2	0.999935	1		Cd44
			2700081O15Rik	6530401D17Rik	0.999934	1		Tex101
			Rwdd2a	Nudt18	0.999934	1		Ets2
			2610528E23Rik	1700019D03Rik	0.999934	1		Tmem146
			Xiap	Bmpr1a	0.999934	1		Fat1
			Plcb4	Mbnl2	0.999934	1		Mtss1
			Tgfbr2	Plscr3	0.999933	1		Dync1li1
			Hspa2	AA467197	0.999933	1		Rapgef2
			Syap1	Rap2c	0.999933	1		Sox2
			Pigy	1810027O10Rik	0.999933	1		Gpr160
			Smad5	Rapgef2	0.999933	1		AW555464
			Sept11	Chst14	0.999933	1		Atp7a
			Sertad2	Nudt18	0.999932	1		Setd7
			Dpysl2	Hmg20a	0.999932	1		Gprasp1
			Bmpr1a	Zfp948	0.999932	1
			Bmpr2	Nrip1	0.999932	1
			Tgfbr2	Lhfpl2	0.999931	1
			Syap1	Ostm1	0.999931	1
			Pdcl2	Lrrc34	0.999931	1
			Insl6	Nt5m	0.999931	1
			Bmpr1a	2810008M24Rik	0.999931	1
			Crat	Nudt18	0.999931	1
			Lyar	1700025K23Rik	0.999931	1
			Tgfbr3	Bicd2	0.999931	1
			Lrrc50	Rnf126	0.99993	1
			Syap1	Wdr26	0.99993	1
			Nenf	Ppap2b	0.99993	1
			Rbms2	Trim2	0.99993	1
			Fosl2	Tgfbr3	0.99993	1
			Rbpj	B230219D22Rik	0.999929	1
			Pxdn	Plscr3	0.999929	1
			Nfib	Tcf7l2	0.999929	1
			Cald1	Pxdn	0.999928	1
			Asrgl1	Nudt18	0.999928	1
			Pacsin2	Tbc1d10b	0.999928	1
			Frmd4a	Tns3	0.999927	1
			Mmd	Parm1	0.999927	1
			1700025K23Rik	Nudt18	0.999927	1
			Xiap	Rapgef2	0.999927	1
			Trib2	Dusp7	0.999926	1
			Fmnl2	B230219D22Rik	0.999926	1
			Bmpr2	E2f3	0.999926	1
			Pml	Mllt6	0.999926	1
			Mtss1	Zfp532	0.999925	1
			Slc22a16	Wfdc3	0.999925	1
			Slc38a4	Auts2	0.999925	1
			Rnaseh2b	Snx18	0.999925	1
			Pla2g6	Ttll5	0.999925	1
			Bmpr1a	2610030H06Rik	0.999925	1
			Fyttd1	Sbf2	0.999924	1
			1810043H04Rik	2310003C23Rik	0.999924	1
			Exd2	Tex101	0.999923	1
			Rab32	Fndc3b	0.999923	1
			Slc40a1	Wls	0.999923	1
			Smad3	Rbms2	0.999923	1
			Kif3b	Ndufaf3	0.999923	1
			Elk4	Snrk	0.999923	1
			Vgll3	Nuak1	0.999922	1
			Ndufaf3	Nudt18	0.999922	1
			Pcbp3	4930455F23Rik	0.999922	1
			Pla2g6	Pcbp3	0.999922	1
			Dkkl1	Pbp2	0.999922	1
			Map2k4	4931406P16Rik	0.999922	1
			Sept11	Fbxo18	0.999922	1
			Flt1	Bace1	0.999921	1
			Sept8	Farp1	0.999921	1
			Apbb2	Mbnl2	0.999921	1
			Tmem146	Ttll5	0.99992	1
			Fmnl2	Btbd3	0.99992	1
			Pcbp3	Pomt1	0.99992	1
			Ccnt1	Ehmt1	0.99992	1
			Hspa2	4930455F23Rik	0.999919	1
			Nuak1	Parva	0.999919	1
			Fmnl2	2700081O15Rik	0.999919	1
			Tmbim4	Nudt18	0.999919	1
			Pcbp3	Pvrl3	0.999919	1
			Pdcd11	2410002O22Rik	0.999919	1
			Fat1	Ppm1l	0.999919	1
			Cald1	Hs2st1	0.999918	1
			Rbms2	Zfp532	0.999918	1
			Gsk3b	Zmynd8	0.999918	1
			Fat1	Rhobtb3	0.999918	1
			Tcf4	Tns3	0.999917	1
			Pomt1	Ccdc108	0.999917	1
			Nuak1	Fam149a	0.999917	1
			1700019E19Rik	Nudt18	0.999917	1
			Slc40a1	Rap2c	0.999917	1
			Oaf	Efemp2	0.999916	1
			Sun5	Banf2	0.999916	1
			Aven	Nudt18	0.999916	1
			Katnb1	Tprn	0.999916	1
			Plscr3	Foxn3	0.999916	1
			Enah	Usp22	0.999916	1
			Asrgl1	Mlf1ip	0.999915	1
			Dtna	Fat1	0.999915	1
			Mad2l2	Morn4	0.999914	1
			Asrgl1	1700019N12Rik	0.999914	1
			Bmpr1a	Zdhhc20	0.999914	1
			Kif3b	Nt5m	0.999914	1
			Kbtbd2	Fam168b	0.999913	1
			Wls	Parm1	0.999912	1
			Ndufaf3	Lrrc50	0.999912	1
			Pcbp3	Pdcl2	0.999912	1
			Lyar	Uchl5	0.999912	1
			Asrgl1	4930455F23Rik	0.999911	1
			Nr2f2	Tmem38a	0.999911	1
			Rbpj	Tns3	0.99991	1
			Rbfox2	Usp22	0.99991	1
			Snx7	Mbnl2	0.99991	1
			Rbms2	Rap2c	0.99991	1
			Insl6	Immp2l	0.99991	1
			Fosl2	Usp22	0.99991	1
			Glt8d1	Arid2	0.999909	1
			Mmd	Osbpl3	0.999909	1
			Asrgl1	Trim37	0.999909	1
			Fndc3b	Farp1	0.999908	1
			Rrp8	Tbc1d10b	0.999908	1
			Xiap	Lats1	0.999908	1
			Sox2	Dppa4	0.999907	1
			Sept8	Sepn1	0.999907	1
			Reep3	Apbb2	0.999907	1
			Sh3gl2	Pard6b	0.999907	1
			4930455F23Rik	Nudt18	0.999907	1
			Dlc1	Kctd15	0.999907	1
			Thoc5	Gpr160	0.999907	1
			Plp2	Nuak1	0.999907	1
			Cd44	Fosl2	0.999906	1
			Fndc3b	Parva	0.999906	1
			Zfp260	Ppap2b	0.999906	1
			Nfib	Nfic	0.999906	1
			Mmd	Tns3	0.999905	1
			Ndufaf3	Rabl5	0.999905	1
			Cald1	Atxn1	0.999904	1
			1810027O10Rik	2700081O15Rik	0.999904	1
			Chd1l	Txnrd3	0.999904	1
			Pcbp3	Mad2l2	0.999904	1
			Slc20a2	Enah	0.999903	1
			Ngly1	Phospho2	0.999903	1
			Tcf7l2	Pdzrn3	0.999903	1
			Prkar2b	Tns3	0.999902	1
			Ttll5	Morn4	0.999902	1
			Emilin1	Odz4	0.999902	1
			Rap2c	Zdhhc20	0.999902	1
			Plscr3	Frmd4a	0.999902	1
			Pacsin2	Lrrc8d	0.999902	1
			Prkci	Bmpr1a	0.999901	1
			Elk4	Btbd3	0.999901	1
			Tgfbr2	Pxdn	0.9999	1
			Oaf	Smpdl3b	0.9999	1
			Cald1	Tnfrsf12a	0.9999	1
			Pxdn	Nuak1	0.9999	1
			Tmbim4	Gpr108	0.9999	1
			Ilk	Elovl1	0.9999	1
			Lyar	Mad2l2	0.9999	1

## Sheet: Mmu Top 60
Mmu Top 60 Test Network
Data Compendium			Top Ranked Edges (≥ 0.9999)					Genes Involved in top edges			GO BP|KEGG Pathway Annotations from the Database for Annotation, Visualization and Integrated Discovery (DAVID), version 6.7
Dataset ID	Also in mESC Compendium		Gene1	Gene2	Posterior	Rank		≥ 0.9999	1		Term	Fold Enrichment	PValue	Genes	Count	%	Bonferroni	Benjamini	FDR
BIND	GDS1824		Mmd	Fndc3b	1	1		Tcf4	Mmd		0 Chart Records
dip	GSE11660		Bmpr2	Bmpr1a	1	1		Plekhg2	Fndc3b
domain_combined	GSE2972b		Ski	Klf7	0.999999	1		Pcgf3	Bmpr2
GDS1056	GSE3223b		Cald1	Fndc3b	0.999999	1		Pcmtd1	Bmpr1a
GDS1339	GSE4189		Tmbim4	Nt5m	0.999999	1		Ccdc104
GDS1367			Sept11	Pxdn	0.999999	1		Fam149a
GDS1446			Tgfbr3	Lpp	0.999999	1		Slc22a16
GDS1529			2700081O15Rik	Zfp532	0.999998	1		Nrip1
GDS1600			Fndc3b	Setd7	0.999998	1		Apbb2
GDS1657			Mpi	Fam98c	0.999997	1		2810008M24Rik
GDS1658			Cald1	Bmpr1a	0.999997	1		4931406P16Rik
GDS168			Pdzrn3	Rapgef2	0.999997	1		Tmem184b
GDS169			Xiap	Rap2c	0.999997	1		Tmbim4
GDS1716			Usp22	Akap13	0.999996	1		Ski
GDS1766			Pdzrn3	Tns3	0.999996	1		Mbnl2
GDS1824			Fndc3b	Nuak1	0.999996	1		Ccdc38
GDS186			Bmpr1a	B230219D22Rik	0.999996	1		Cpt1b
GDS1879			Tgfbr2	Bmpr1a	0.999995	1		Irak1bp1
GDS1880			Nuak1	Pard3	0.999995	1		Mgrn1
GDS1987			2700081O15Rik	Usp22	0.999995	1		Katnb1
GDS2061			Fndc3b	Rapgef2	0.999995	1		2700081O15Rik
GDS2178			Fndc3b	Pdzrn3	0.999995	1		Mpi
GDS2224			Prkci	Snrk	0.999994	1		Klf7
GDS2285			Mpi	Nt5m	0.999993	1		Lrrc50
GDS2390			Cald1	Pdzrn3	0.999993	1		Neo1
GDS243			Frmd4a	Fam168b	0.999991	1		Pacsin2
GDS2483			Fndc3b	Frmd4a	0.999991	1		4930455F23Rik
GDS249			Plscr3	Farp1	0.999991	1		Rhbdd3
GDS2524			Dusp13	Tmc5	0.999991	1		Nfib
GDS2662			Cald1	Nuak1	0.99999	1		Snx7
GDS2699			Ypel1	Nt5m	0.99999	1		Ndufaf3
GDS2718			Bmpr2	Rapgef2	0.99999	1		Zmynd8
GDS2949			Fat1	Zfp532	0.99999	1		Maf
GDS2950			Pxdn	Pdzrn3	0.999989	1		Plp2
GDS384			Lrrc50	Morn4	0.999989	1		Gps2
GDS409			Ndufaf3	Mad2l2	0.999989	1		Frmd4a
GDS45			Prkci	Fat1	0.999988	1		Glg1
GDS50			Rnf146	Kbtbd2	0.999988	1		Odz4
GDS52			Spry2	Tns3	0.999988	1		Mfhas1
GDS522			Bmpr1a	Hmgn3	0.999988	1		Mmd
GDS578			Usp22	Tns3	0.999987	1		Rfk
GDS58			Katnb1	Morn4	0.999987	1		Pbp2
GDS606			Plscr3	2700081O15Rik	0.999987	1		Pbx4
GDS682			Dcakd	Usp22	0.999987	1		Setx
GDS701			Bmpr1a	Bhlhb9	0.999986	1		Cby1
GDS868			Fat1	Akap13	0.999986	1		Cenpp
GDS878			Fat1	Zfp518b	0.999986	1		Fam98c
GDS949			Fat1	Pdzrn3	0.999986	1		Cxadr
Glom_less_4_conditions			Fosl2	Apbb2	0.999986	1		Sema3c
GRID			Bmpr1a	Pcgf3	0.999985	1		Acvr1
GSE11660			Fat1	Rapgef2	0.999985	1		Plscr3
GSE2972b			Tgfbr2	Mfhas1	0.999984	1		Enah
GSE3223b			Gpr160	Aven	0.999984	1		Arid2
GSE4189			Nrip1	Bmpr1a	0.999984	1		Dcakd
inparanoid_scores			Fat1	Cnpy4	0.999984	1		Snx18
intact_fingerprinting			Nt5m	Cby1	0.999983	1		Ptprg
intact_immuno			Larp1b	Hcfc2	0.999983	1		Rai1
intact_western			Prkci	Pcgf3	0.999982	1		Cd44
Phenotype_and_disease_combined			Prkci	Tns3	0.999981	1		Rhobtb3
transfac_euclidean			Ski	2700081O15Rik	0.999981	1		Gramd4
			Lyar	Mlf1ip	0.999981	1		Spaca3
			Lyar	Asrgl1	0.999981	1		Nudt18
			Mpi	Ndufaf3	0.99998	1		Senp5
			Cald1	Tns3	0.99998	1		Smpdl3b
			Mmd	Setd7	0.99998	1		Tgfbr3
			Ndufaf3	Pomt1	0.99998	1		Asb13
			Adamts5	Rhobtb3	0.99998	1		Aven
			Kif3b	Pcbp3	0.99998	1		Lpin1
			Rnf126	Morn4	0.999979	1		Snrk
			Tshz1	Pdzrn3	0.999979	1		Syap1
			Bmpr1a	Fndc3b	0.999979	1		Gsk3b
			Chsy1	Zfp532	0.999978	1		Oaf
			Fat1	Tns3	0.999978	1		Cnpy4
			Xiap	Fndc3b	0.999978	1		Lyar
			E2f3	Bmpr1a	0.999977	1		Zmynd10
			Bmpr1a	Spred1	0.999976	1		Fosl2
			Parva	Farp1	0.999975	1		Pxdn
			Ndufaf3	Tmbim4	0.999975	1		Mad2l2
			Fat1	2700081O15Rik	0.999975	1		Plcb4
			Fosl2	Pxdn	0.999975	1		Zfyve21
			Wls	Kbtbd2	0.999974	1		Rbfox2
			Pcbp3	Mapk8ip2	0.999974	1		Hmg20a
			Tshz1	Fndc3b	0.999974	1		Mn1
			Efna5	Nr2f2	0.999974	1		Zfp260
			Elk4	Snrk	0.999974	1		Ppil1
			Prkci	Bmpr1a	0.999973	1		Morn2
			Bmpr1a	Nuak1	0.999973	1		Trib2
			Enah	Fat1	0.999973	1		Gata4
			Lyar	Ttll5	0.999973	1		Rod1
			Cald1	Bmpr2	0.999972	1		Rnf126
			Dync1li1	Tns3	0.999972	1		Fndc3b
			Tcf7l2	Tns3	0.999972	1		Cklf
			Kif3b	Itpk1	0.999972	1		Mex3c
			Efna5	Nuak1	0.999972	1		Arfip1
			Glg1	Zfp518b	0.999972	1		Ttll5
			Pla2g6	Mad2l2	0.999971	1		B230219D22Rik
			Dkkl1	Asrgl1	0.999971	1		Chd1l
			Bmpr1a	Wls	0.999971	1		Hspa2
			Dyrk3	Lpin1	0.999971	1		Larp1b
			Bmpr2	Pdzrn3	0.999971	1		Wls
			Fat1	Plscr3	0.999971	1		Tcf7l2
			Mmd	Pdzrn3	0.99997	1		Myl6
			Ndufaf3	4930455F23Rik	0.99997	1		Banf2
			Enah	Zfp532	0.99997	1		Dkkl1
			Glg1	Fat1	0.99997	1		Reep3
			Fat1	Bhlhb9	0.999969	1		Sept11
			Tgfbr2	Asb13	0.999968	1		2310022B05Rik
			Sox11	Nr2f2	0.999968	1		Hmgn3
			Hspa2	Dkkl1	0.999968	1		Cast
			Xiap	Bmpr1a	0.999968	1		Sox11
			Elk4	Hmgn3	0.999968	1		Tshz1
			Ptprg	Fosl2	0.999967	1		Tdrd7
			Cald1	Farp1	0.999967	1		Xiap
			Pvrl3	Agtpbp1	0.999967	1		1700025K23Rik
			Tcf7l2	Trib2	0.999967	1		Smad5
			Larp1b	Tdrd7	0.999966	1		Wfdc3
			Bdp1	A230046K03Rik	0.999966	1		Cald1
			Apbb2	Mmd	0.999966	1		Txnrd3
			Sema3c	Fat1	0.999966	1		Adamts5
			Lyar	Aven	0.999966	1		Slc35f5
			Elk4	Fam168b	0.999966	1		Chst12
			Rbpj	Bmpr1a	0.999965	1		Hcfc2
			Pla2g6	Morn4	0.999965	1		Tmc5
			Smad5	Rapgef2	0.999964	1		Sema6d
			Fosl2	Nuak1	0.999964	1		Fbxo18
			Dbndd1	Morn4	0.999963	1		AA467197
			Fndc3b	Tns3	0.999963	1		Hn1l
			Pcbp3	Pbx4	0.999963	1		Dbndd1
			Ddx20	Lpin1	0.999962	1		Bmpr2
			Mpi	Tmbim4	0.999961	1		Dpysl2
			Acvr1	Tgfbr2	0.999961	1		Lef1
			Fmnl2	Hmgn3	0.999961	1		Sun5
			Ndufaf3	Irak1bp1	0.999961	1		Wtip
			Tnfrsf12a	Mmd	0.99996	1		Pdzrn3
			Fat1	Dpysl2	0.99996	1		Itpk1
			Ndst1	Tmem184b	0.99996	1		Rap2c
			Ttll5	Morn4	0.999959	1		Ttll6
			Lyar	Ccdc104	0.999959	1		Rwdd2a
			Fosl2	Lhfpl2	0.999959	1		Zfp532
			Elk4	Tns3	0.999959	1		Nuak1
			Prkci	Zfp518b	0.999958	1		Zfp518b
			Cenpp	Setx	0.999958	1		Dyrk3
			Pla2g6	Nt5m	0.999958	1		Chsy1
			Pacsin2	Map2k4	0.999958	1		Lats1
			Sept11	Odz4	0.999958	1		Prkar2b
			Gprasp1	Kbtbd2	0.999957	1		Tns3
			Fosl2	Chsy1	0.999957	1		Atrx
			Elk4	2210013O21Rik	0.999957	1		Parva
			Lrrc8d	Gramd4	0.999956	1		Rbpj
			Pcbp3	4930455F23Rik	0.999956	1		Dusp13
			Bmpr2	Syap1	0.999956	1		Rnf146
			Cald1	Trib2	0.999955	1		Lrrc8d
			Nuak1	Farp1	0.999955	1		Slc9a6
			Atp7a	Bmpr1a	0.999954	1		Ypel1
			Mllt10	Setx	0.999954	1		Insl6
			Vezf1	Bmpr1a	0.999954	1		Lrrc34
			Ski	Tns3	0.999953	1		Cog6
			Nuak1	Parm1	0.999953	1		Pdcd11
			Spaca3	Sun5	0.999953	1		Nt5m
			Ndufaf3	Cog6	0.999953	1		Arhgap29
			Fosl2	Fndc3b	0.999953	1		Fam111a
			Prkar2b	Tshz1	0.999952	1		Ift140
			Plscr3	Trib2	0.999952	1		Efna5
			Ndufaf3	Lrrc50	0.999952	1		Tcfl5
			Bmpr2	Setd7	0.999952	1		Tbc1d10b
			Fosl2	Lhfp	0.999952	1		Akap13
			Tgfbr2	Fndc3b	0.999951	1		Bdp1
			Hspa2	AA467197	0.999951	1		Asrgl1
			Cpt1b	Dkkl1	0.999951	1		Bhlhb9
			Enah	Bmpr1a	0.999951	1		Pdcl2
			Myo10	Fat1	0.999951	1		B4galt4
			Elk4	Btbd3	0.99995	1		Mapk8ip2
			Frmd4a	Setd7	0.999949	1		Ehmt1
			Bmpr1a	Zfp260	0.999949	1		Morn4
			Hn1l	Ppil1	0.999949	1		Psrc1
			Kif3b	Ndufaf3	0.999949	1		Pard3
			Xiap	Lats1	0.999949	1		St3gal2
			Lyar	1700025K23Rik	0.999949	1		Spred1
			Asrgl1	Morn4	0.999948	1		Pla2g6
			Pvrl3	Hook2	0.999947	1		E2f3
			2700081O15Rik	Chsy1	0.999947	1		Tnfrsf12a
			Bmpr1a	Rhobtb3	0.999947	1		Usp22
			Pomt1	Ift140	0.999946	1		Btbd3
			Bmpr1a	Kbtbd2	0.999946	1		Slc38a4
			Bmpr1a	2810008M24Rik	0.999946	1		Ddx20
			Cast	Fndc3b	0.999946	1		Fam168b
			Pcbp3	Morn4	0.999945	1		Auts2
			Bmpr2	E2f3	0.999945	1		Hook2
			Lyar	Dkkl1	0.999945	1		Mllt10
			Nuak1	Fam149a	0.999944	1		Nr2f2
			Ehmt1	Usp22	0.999944	1		Spry2
			Arfip1	Slc35f5	0.999944	1		Lhfp
			4930455F23Rik	Nudt18	0.999943	1		Nup205
			Ndufaf3	Nudt18	0.999943	1		Gltpd1
			Cklf	AA467197	0.999942	1		Elk4
			Slc22a16	Wfdc3	0.999942	1		Map2k4
			Tcf7l2	Wls	0.999942	1		Mlf1ip
			Zfyve21	B4galt4	0.999941	1		Kif3b
			Chd1l	Txnrd3	0.999941	1		Parm1
			Syap1	Wls	0.999941	1		Myo10
			Mpi	Nudt18	0.99994	1		Prkci
			Atp7a	Fat1	0.999939	1		Tgfbr2
			Hcfc2	Arhgap29	0.999939	1		Ppm1l
			Dkkl1	Pbp2	0.999939	1		2210013O21Rik
			Tgfbr2	Pdzrn3	0.999938	1		Fmnl2
			Rbpj	Fat1	0.999937	1		Ndst1
			Katnb1	Wfdc3	0.999937	1		Lpp
			Asrgl1	4930455F23Rik	0.999937	1		Bmpr1a
			Bmpr1a	Pcmtd1	0.999937	1		Pvrl3
			Plcb4	Mbnl2	0.999937	1		A230046K03Rik
			Nfib	Tcf7l2	0.999937	1		Glt8d1
			Jak1	Hp1bp3	0.999936	1		Pomt1
			Tgfbr2	Fam111a	0.999935	1		Efhc1
			Reep3	Fosl2	0.999935	1		Lhfpl2
			Cald1	Parva	0.999935	1		Creb3l2
			St3gal2	Fosl2	0.999934	1		Hp1bp3
			Cald1	Fosl2	0.999934	1		Kbtbd2
			Pcgf3	Senp5	0.999934	1		Farp1
			Insl6	4930455F23Rik	0.999934	1		Agtpbp1
			Pacsin2	Tbc1d10b	0.999934	1		Vezf1
			Elk4	Frmd4a	0.999934	1		Wdr26
			Ski	Efna5	0.999933	1		Fat1
			Reep3	Apbb2	0.999933	1		Dync1li1
			Txnrd3	Tcfl5	0.999933	1		Rapgef2
			Fat1	Mgrn1	0.999933	1		Jak1
			Fat1	Bmpr1a	0.999933	1		Gpr160
			Lef1	Ttll6	0.999932	1		Gprasp1
			Tnfrsf12a	Chst12	0.999932	1		Atp7a
			Tcf4	Plcb4	0.999931	1		Setd7
			Rod1	Wdr26	0.999931	1		Pcbp3
			Aven	Morn2	0.999931	1
			Mmd	Btbd3	0.999931	1
			Syap1	2810008M24Rik	0.999931	1
			Cald1	Mmd	0.99993	1
			Snx18	Tns3	0.99993	1
			Tcf7l2	Pdzrn3	0.99993	1
			Cald1	Setd7	0.999929	1
			Kbtbd2	Fam168b	0.999929	1
			Snx7	Nuak1	0.999929	1
			Slc38a4	Auts2	0.999929	1
			Pla2g6	Ttll5	0.999929	1
			Mpi	Asrgl1	0.999927	1
			2210013O21Rik	Trib2	0.999927	1
			Asrgl1	Mad2l2	0.999927	1
			Pcbp3	Mad2l2	0.999927	1
			Bmpr2	Mex3c	0.999927	1
			Cald1	Fam149a	0.999926	1
			Efna5	Mn1	0.999925	1
			Prkci	Syap1	0.999924	1
			Gltpd1	Nudt18	0.999924	1
			Mad2l2	Nup205	0.999924	1
			Syap1	B230219D22Rik	0.999924	1
			Fat1	Ppm1l	0.999923	1
			Oaf	Creb3l2	0.999922	1
			Cd44	Reep3	0.999922	1
			Ift140	Rhbdd3	0.999922	1
			Pdzrn3	Snx18	0.999922	1
			Arfip1	Bmpr1a	0.999922	1
			Rai1	Klf7	0.999922	1
			Rbpj	Prkci	0.999921	1
			Fosl2	Tns3	0.999921	1
			Prkci	Kbtbd2	0.99992	1
			Atrx	Pcmtd1	0.99992	1
			Rnf126	Mad2l2	0.999919	1
			Insl6	Lrrc50	0.999919	1
			Dpysl2	Hmg20a	0.999919	1
			Map2k4	4931406P16Rik	0.999919	1
			Pdcd11	Zfp532	0.999919	1
			Bmpr2	Fndc3b	0.999918	1
			Glg1	Wtip	0.999918	1
			Nuak1	Lhfpl2	0.999917	1
			Xiap	Cxadr	0.999917	1
			Rfk	Hmgn3	0.999916	1
			Pcbp3	Pomt1	0.999916	1
			Insl6	Nt5m	0.999916	1
			Fosl2	Myl6	0.999916	1
			Cpt1b	Efhc1	0.999915	1
			Cald1	2310022B05Rik	0.999914	1
			Gsk3b	Zmynd8	0.999914	1
			Bmpr1a	Rbfox2	0.999914	1
			Bmpr1a	Gprasp1	0.999913	1
			Pcbp3	Pdcl2	0.999912	1
			Plp2	Nuak1	0.999911	1
			Gata4	Nr2f2	0.99991	1
			Usp22	Sema6d	0.999909	1
			Nt5m	Mad2l2	0.999909	1
			Rwdd2a	Nudt18	0.999909	1
			Pdcl2	Lrrc34	0.999908	1
			Sept11	Cnpy4	0.999907	1
			Ski	Plekhg2	0.999906	1
			Cald1	Lhfpl2	0.999906	1
			Pla2g6	Pcbp3	0.999906	1
			Glt8d1	Arid2	0.999905	1
			Ndufaf3	Zmynd10	0.999905	1
			Pcbp3	Asrgl1	0.999905	1
			Plscr3	Setd7	0.999904	1
			Psrc1	Smpdl3b	0.999904	1
			Gps2	Morn4	0.999904	1
			Xiap	Hmgn3	0.999904	1
			Sun5	Banf2	0.999903	1
			Maf	Rapgef2	0.999902	1
			Setd7	Pdzrn3	0.999902	1
			Bmpr1a	Slc9a6	0.999902	1
			Lyar	Mad2l2	0.999902	1
			Tgfbr2	Fosl2	0.999901	1
			Pbx4	Pomt1	0.999901	1
			Fat1	Usp22	0.999901	1
			Efna5	Neo1	0.999901	1
			Pvrl3	Ccdc38	0.9999	1
			Ypel1	1700025K23Rik	0.9999	1
			Sept11	Fbxo18	0.9999	1

## Sheet: Mmu Random 60
Table S13. Data Compendium Tests
Mmu Random 60 Test Network
Table S8. Data Compendium Tests
Mmu Random 60 Test Network
Data Compendium			Top Ranked Edges (≥ 0.9999)					Genes Involved in top edges			GO BP|KEGG Pathway Annotations from the Database for Annotation, Visualization and Integrated Discovery (DAVID), version 6.7
Dataset ID	Also in mESC Compendium		Gene1	Gene2	Posterior	Rank		≥ 0.9999	1		Term	Fold Enrichment	PValue	Genes	Count	%	Bonferroni	Benjamini	FDR
GDS1030	GDS2906		C79407	Nusap1	0.998318	1		C79407	None		0 Chart Records
GDS1058	GSE3231a							Nusap1
GDS1228	GSE3528
GDS1315	GSE3749a
GDS1338	GSE7506a
GDS1409	GSE7866
GDS1488	GSE8574
GDS1606	GSE9978
GDS1632
GDS1634
GDS1635
GDS1647
GDS1658
GDS1693
GDS1803
GDS1810
GDS1943
GDS2031
GDS2053
GDS2099
GDS2224
GDS2304
GDS2327
GDS242
GDS2496
GDS2497
GDS2537
GDS2554
GDS2561
GDS2636
GDS2648
GDS2687
GDS2698
GDS2700
GDS2762
GDS2765
GDS2906
GDS2917
GDS2934
GDS2949
GDS307
GDS321
GDS325
GDS394
GDS401
GDS410
GDS514
GDS578
GDS631
GDS684
GDS700
GDS703
GDS813
GSE3231a
GSE3528
GSE3749a
GSE7506a
GSE7866
GSE8574
GSE9978

## Sheet: Gold Standard Posteriors
Table S8. Data Compendium Tests
Gold Standard Posterior Correlations
mESC Gene Expression Network				Mmu Top 60 Network				Mmu Top 60 Gene Expression Network				Mmu Random 60 Network
Actr2	Acvr1	0.718357		Actr2	Acvr1	0.221563		Actr2	Acvr1	0.299181		Actr2	Acvr1	0.0481878
Actr2	Bmp4	0.285556		Actr2	Bmp4	0.647873		Actr2	Bmp4	0.322735		Actr2	Bmp4	0.114602
Actr2	Smad4	0.155029		Actr2	Smad4	0.244557		Actr2	Smad4	0.0560705		Actr2	Smad4	0.0544295
Acvr1	Acvr2b	0.94191		Acvr1	Acvr2b	0.99847		Acvr1	Acvr2b	0.939244		Acvr1	Acvr2b	0.32812
Acvr1	Bmp4	0.474218		Acvr1	Bmp4	0.132509		Acvr1	Bmp4	0.267916		Acvr1	Bmp4	0.106354
Acvr1	Smad4	0.679518		Acvr1	Smad4	0.164199		Acvr1	Smad4	0.0977532		Acvr1	Smad4	0.439963
Acvr2b	Bmp4	0.994989		Acvr2b	Bmp4	0.481747		Acvr2b	Bmp4	0.592861		Acvr2b	Bmp4	0.210022
Acvr2b	Smad4	0.901487		Acvr2b	Smad4	0.948616		Acvr2b	Smad4	0.839653		Acvr2b	Smad4	0.0762705
Akt1	Apc	0.110698		Akt1	Apc	0.0306345		Akt1	Apc	0.128327		Akt1	Apc	0.238364
Akt1	Ctnnb1	0.07789		Akt1	Ctnnb1	0.891591		Akt1	Ctnnb1	0.343253		Akt1	Ctnnb1	0.0424362
Akt1	Fos	0.333953		Akt1	Fos	0.961902		Akt1	Fos	0.633796		Akt1	Fos	0.0956302
Akt1	Hnf1a	0.0120055		Akt1	Hnf1a	0.559783		Akt1	Hnf1a	0.250936		Akt1	Hnf1a	0.233303
Akt1	Jun	0.0165022		Akt1	Jun	0.434794		Akt1	Jun	0.409242		Akt1	Jun	0.20498
Akt1	Lif	0.683924		Akt1	Lif	0.0718919		Akt1	Lif	0.074052		Akt1	Lif	0.293065
Akt1	Mdm2	0.888867		Akt1	Mdm2	0.434187		Akt1	Mdm2	0.274777		Akt1	Mdm2	0.170976
Akt1	Tbx3	0.269317		Akt1	Tbx3	0.184912		Akt1	Tbx3	0.074413		Akt1	Tbx3	0.176062
Akt2	Akt1	0.150832		Akt2	Akt1	0.112909		Akt2	Akt1	0.129289		Akt2	Akt1	0.155111
Akt2	Akt3	0.521332		Akt2	Akt3	0.305183		Akt2	Akt3	0.612227		Akt2	Akt3	0.19904
Akt2	Apc	0.196581		Akt2	Apc	0.0367477		Akt2	Apc	0.0652566		Akt2	Apc	0.107267
Akt2	Ctnnb1	0.75157		Akt2	Ctnnb1	0.134646		Akt2	Ctnnb1	0.0755585		Akt2	Ctnnb1	0.158538
Akt2	Ephb1	0.637877		Akt2	Ephb1	0.231524		Akt2	Ephb1	0.225609		Akt2	Ephb1	0.201463
Akt2	Fos	0.175998		Akt2	Fos	0.177276		Akt2	Fos	0.0433403		Akt2	Fos	0.0948197
Akt2	Gab1	0.660283		Akt2	Gab1	0.418057		Akt2	Gab1	0.134616		Akt2	Gab1	0.0797778
Akt2	Gsk3b	0.0950655		Akt2	Gsk3b	0.0348471		Akt2	Gsk3b	0.0970532		Akt2	Gsk3b	0.293024
Akt2	Hnf1a	0.988347		Akt2	Hnf1a	0.278987		Akt2	Hnf1a	0.264047		Akt2	Hnf1a	0.239508
Akt2	Ikbkb	0.483557		Akt2	Ikbkb	0.49215		Akt2	Ikbkb	0.102052		Akt2	Ikbkb	0.277654
Akt2	Ikbke	0.861981		Akt2	Ikbke	0.937115		Akt2	Ikbke	0.91614		Akt2	Ikbke	0.118199
Akt2	Ikbkg	0.060758		Akt2	Ikbkg	0.120684		Akt2	Ikbkg	0.0437353		Akt2	Ikbkg	0.0252492
Akt2	Inpp5d	0.514572		Akt2	Inpp5d	0.210358		Akt2	Inpp5d	0.297311		Akt2	Inpp5d	0.0118873
Akt2	Jun	0.0789242		Akt2	Jun	0.0181015		Akt2	Jun	0.0448035		Akt2	Jun	0.0579535
Akt2	Mapk1	0.996859		Akt2	Mapk1	0.0824398		Akt2	Mapk1	0.267972		Akt2	Mapk1	0.153048
Akt2	Mapk12	0.282066		Akt2	Mapk12	0.0217118		Akt2	Mapk12	0.0926108		Akt2	Mapk12	0.150574
Akt2	Mapk4	0.999918		Akt2	Mapk4	0.774665		Akt2	Mapk4	0.39463		Akt2	Mapk4	0.796811
Akt2	Mapk6	0.848596		Akt2	Mapk6	0.668844		Akt2	Mapk6	0.623168		Akt2	Mapk6	0.0332571
Akt2	Mapk7	0.0527951		Akt2	Mapk7	0.0909236		Akt2	Mapk7	0.0458572		Akt2	Mapk7	0.151903
Akt2	Mdm2	0.337095		Akt2	Mdm2	0.369011		Akt2	Mdm2	0.267789		Akt2	Mdm2	0.334305
Akt2	Mtor	0.143686		Akt2	Mtor	0.185973		Akt2	Mtor	0.149848		Akt2	Mtor	0.103789
Akt2	Pdk1	0.144068		Akt2	Pdk1	0.0882546		Akt2	Pdk1	0.0921818		Akt2	Pdk1	0.0688462
Akt2	Pten	0.199073		Akt2	Pten	0.955205		Akt2	Pten	0.773152		Akt2	Pten	0.422747
Akt3	Akt1	0.549527		Akt3	Akt1	0.111742		Akt3	Akt1	0.0574745		Akt3	Akt1	0.0461169
Akt3	Apc	0.212938		Akt3	Apc	0.0988316		Akt3	Apc	0.0719049		Akt3	Apc	0.543804
Akt3	Ctnnb1	0.572661		Akt3	Ctnnb1	0.0533424		Akt3	Ctnnb1	0.153034		Akt3	Ctnnb1	0.257758
Akt3	Fos	0.201103		Akt3	Fos	0.155234		Akt3	Fos	0.186473		Akt3	Fos	0.133833
Akt3	Gsk3b	0.313554		Akt3	Gsk3b	0.433773		Akt3	Gsk3b	0.139293		Akt3	Gsk3b	0.258744
Akt3	Hnf1a	0.0573692		Akt3	Hnf1a	0.0610123		Akt3	Hnf1a	0.181839		Akt3	Hnf1a	0.158928
Akt3	Ikbke	0.0279317		Akt3	Ikbke	0.022665		Akt3	Ikbke	0.0242974		Akt3	Ikbke	0.162938
Akt3	Jun	0.529778		Akt3	Jun	0.907669		Akt3	Jun	0.535111		Akt3	Jun	0.0711709
Akt3	Mapk1	0.517628		Akt3	Mapk1	0.0141309		Akt3	Mapk1	0.0130478		Akt3	Mapk1	0.0313168
Akt3	Mapk12	0.432492		Akt3	Mapk12	0.118036		Akt3	Mapk12	0.130639		Akt3	Mapk12	0.311961
Akt3	Mapk4	0.0153344		Akt3	Mapk4	0.0158576		Akt3	Mapk4	0.0546616		Akt3	Mapk4	0.0917937
Akt3	Mapk6	0.625758		Akt3	Mapk6	0.399594		Akt3	Mapk6	0.159045		Akt3	Mapk6	0.155574
Akt3	Mapk7	0.531065		Akt3	Mapk7	0.138639		Akt3	Mapk7	0.107792		Akt3	Mapk7	0.212388
Akt3	Mdm2	0.0605387		Akt3	Mdm2	0.156552		Akt3	Mdm2	0.103319		Akt3	Mdm2	0.111865
Akt3	Mtor	0.443017		Akt3	Mtor	0.244944		Akt3	Mtor	0.0460755		Akt3	Mtor	0.0202485
Akt3	Pdk1	0.0858762		Akt3	Pdk1	0.117952		Akt3	Pdk1	0.0188714		Akt3	Pdk1	0.0999453
Apc	Ctnnb1	0.0252657		Apc	Ctnnb1	0.188126		Apc	Ctnnb1	0.0218315		Apc	Ctnnb1	0.0420061
Apc	Hnf1a	0.0222175		Apc	Hnf1a	0.0684681		Apc	Hnf1a	0.0205725		Apc	Hnf1a	0.064124
Apobec2	Esrrb	0.0837457		Apobec2	Esrrb	0.0267355		Apobec2	Esrrb	0.0379984		Apobec2	Esrrb	0.161644
Araf	Egf	0.414497		Araf	Egf	0.087585		Araf	Egf	0.0780761		Araf	Egf	0.00761618
Araf	Egfr	0.423444		Araf	Egfr	0.127767		Araf	Egfr	0.133061		Araf	Egfr	0.0463683
Araf	Fgf1	0.96833		Araf	Fgf1	0.167533		Araf	Fgf1	0.71042		Araf	Fgf1	0.53566
Araf	Fgf2	0.0822502		Araf	Fgf2	0.0305755		Araf	Fgf2	0.0386133		Araf	Fgf2	0.303649
Araf	Fgf3	0.09217		Araf	Fgf3	0.968846		Araf	Fgf3	0.894638		Araf	Fgf3	0.25516
Araf	Fgf4	0.141815		Araf	Fgf4	0.18688		Araf	Fgf4	0.137391		Araf	Fgf4	0.155032
Araf	Fgf5	0.234822		Araf	Fgf5	0.378593		Araf	Fgf5	0.247395		Araf	Fgf5	0.144322
Araf	Fgf6	0.11498		Araf	Fgf6	0.365426		Araf	Fgf6	0.198701		Araf	Fgf6	0.261026
Araf	Fgf7	0.141614		Araf	Fgf7	0.604447		Araf	Fgf7	0.389167		Araf	Fgf7	0.104078
Araf	Fgf8	0.0581019		Araf	Fgf8	0.017392		Araf	Fgf8	0.0363431		Araf	Fgf8	0.326604
Araf	Fgfr1	0.133703		Araf	Fgfr1	0.034536		Araf	Fgfr1	0.0349143		Araf	Fgfr1	0.161264
Araf	Fgfr2	0.0196944		Araf	Fgfr2	0.138299		Araf	Fgfr2	0.0137919		Araf	Fgfr2	0.0383868
Araf	Fgfr3	0.0957484		Araf	Fgfr3	0.0316723		Araf	Fgfr3	0.201666		Araf	Fgfr3	0.446906
Araf	Fgfr4	0.0468442		Araf	Fgfr4	0.0936857		Araf	Fgfr4	0.0259839		Araf	Fgfr4	0.0846407
Araf	Fos	0.0160687		Araf	Fos	0.702088		Araf	Fos	0.489228		Araf	Fos	0.0411905
Araf	Jun	0.0659149		Araf	Jun	0.902559		Araf	Jun	0.908904		Araf	Jun	0.0588779
Araf	Lif	0.181001		Araf	Lif	0.435407		Araf	Lif	0.0270792		Araf	Lif	0.0872298
Araf	Lifr	0.0706342		Araf	Lifr	0.0390279		Araf	Lifr	0.0799424		Araf	Lifr	0.149376
Araf	Ptpn11	0.0345382		Araf	Ptpn11	0.0441532		Araf	Ptpn11	0.00669553		Araf	Ptpn11	0.112065
Araf	Sepp1	0.114906		Araf	Sepp1	0.966778		Araf	Sepp1	0.943967		Araf	Sepp1	0.0545235
Araf	Sos1	0.155152		Araf	Sos1	0.0537548		Araf	Sos1	0.0561974		Araf	Sos1	0.239504
Atoh1	Eed	0.0438015		Atoh1	Eed	0.156814		Atoh1	Eed	0.0497483		Atoh1	Eed	0.0848067
Atoh1	H3f3a	0.158073		Atoh1	H3f3a	0.0866691		Atoh1	H3f3a	0.120748		Atoh1	H3f3a	0.245804
Atoh1	H3f3b	0.0207399		Atoh1	H3f3b	0.101439		Atoh1	H3f3b	0.110086		Atoh1	H3f3b	0.0708202
Axin1	Apc	0.109202		Axin1	Apc	0.158966		Axin1	Apc	0.139026		Axin1	Apc	0.145177
Axin1	Ctnnb1	0.114537		Axin1	Ctnnb1	0.527571		Axin1	Ctnnb1	0.589819		Axin1	Ctnnb1	0.064116
Axin1	Dvl1	0.0153444		Axin1	Dvl1	0.0960657		Axin1	Dvl1	0.0657763		Axin1	Dvl1	0.141957
Axin1	Fzd1	0.117055		Axin1	Fzd1	0.096784		Axin1	Fzd1	0.076205		Axin1	Fzd1	0.0812118
Axin1	Fzd2	0.0210749		Axin1	Fzd2	0.0450251		Axin1	Fzd2	0.0527432		Axin1	Fzd2	0.225975
Axin1	Fzd9	0.120328		Axin1	Fzd9	0.480441		Axin1	Fzd9	0.29125		Axin1	Fzd9	0.188945
Axin1	Gsk3b	0.343898		Axin1	Gsk3b	0.743858		Axin1	Gsk3b	0.771553		Axin1	Gsk3b	0.627555
Axin1	Hnf1a	0.0160836		Axin1	Hnf1a	0.126862		Axin1	Hnf1a	0.166076		Axin1	Hnf1a	0.0792607
Axin1	Lrp5	0.00742404		Axin1	Lrp5	0.127764		Axin1	Lrp5	0.0550487		Axin1	Lrp5	0.0552099
Axin1	Lrp6	0.0233189		Axin1	Lrp6	0.126332		Axin1	Lrp6	0.0737535		Axin1	Lrp6	0.0557038
Axin1	Wnt1	0.0383991		Axin1	Wnt1	0.183873		Axin1	Wnt1	0.146628		Axin1	Wnt1	0.133132
Axin1	Wnt2	0.0199004		Axin1	Wnt2	0.129254		Axin1	Wnt2	0.096568		Axin1	Wnt2	0.14005
Axin1	Wnt2b	0.417271		Axin1	Wnt2b	0.170086		Axin1	Wnt2b	0.48582		Axin1	Wnt2b	0.152055
Axin1	Wnt3	0.232929		Axin1	Wnt3	0.385445		Axin1	Wnt3	0.568421		Axin1	Wnt3	0.180286
Axin1	Wnt3a	0.173498		Axin1	Wnt3a	0.243061		Axin1	Wnt3a	0.240161		Axin1	Wnt3a	0.0590411
Axin1	Wnt4	0.0481266		Axin1	Wnt4	0.612062		Axin1	Wnt4	0.22058		Axin1	Wnt4	0.0652703
Axin1	Wnt5a	0.116635		Axin1	Wnt5a	0.440807		Axin1	Wnt5a	0.477402		Axin1	Wnt5a	0.310799
Axin1	Wnt5b	0.786092		Axin1	Wnt5b	0.152952		Axin1	Wnt5b	0.307919		Axin1	Wnt5b	0.681411
Axin1	Wnt7a	0.0465272		Axin1	Wnt7a	0.394655		Axin1	Wnt7a	0.20599		Axin1	Wnt7a	0.151946
Axin1	Wnt7b	0.27743		Axin1	Wnt7b	0.832146		Axin1	Wnt7b	0.824217		Axin1	Wnt7b	0.268177
Bmi1	Sox2	0.0352039		Bmi1	Sox2	0.958732		Bmi1	Sox2	0.70958		Bmi1	Sox2	0.0251112
Bmi1	Yy1	0.0249195		Bmi1	Yy1	0.714335		Bmi1	Yy1	0.749057		Bmi1	Yy1	0.0159586
Bmp4	Fos	0.325787		Bmp4	Fos	0.0591724		Bmp4	Fos	0.111001		Bmp4	Fos	0.13033
Bmp4	Id1	0.951757		Bmp4	Id1	0.384225		Bmp4	Id1	0.631924		Bmp4	Id1	0.548022
Bmp4	Jun	0.676875		Bmp4	Jun	0.343873		Bmp4	Jun	0.10229		Bmp4	Jun	0.0435177
Bmp4	Lif	0.0191285		Bmp4	Lif	0.106182		Bmp4	Lif	0.294501		Bmp4	Lif	0.344382
Bmp4	Smad4	0.0322849		Bmp4	Smad4	0.451279		Bmp4	Smad4	0.509363		Bmp4	Smad4	0.0546083
Bmpr1a	Actr2	0.289801		Bmpr1a	Actr2	0.22563		Bmpr1a	Actr2	0.677415		Bmpr1a	Actr2	0.0175615
Bmpr1a	Acvr2b	0.319936		Bmpr1a	Acvr2b	0.00608584		Bmpr1a	Acvr2b	0.0155506		Bmpr1a	Acvr2b	0.166508
Bmpr1a	Bmp4	0.0190005		Bmpr1a	Bmp4	0.0134739		Bmpr1a	Bmp4	0.0403849		Bmpr1a	Bmp4	0.0951555
Bmpr1a	Fos	0.236062		Bmpr1a	Fos	0.3381		Bmpr1a	Fos	0.0429103		Bmpr1a	Fos	0.268932
Bmpr1a	Jun	0.168207		Bmpr1a	Jun	0.176756		Bmpr1a	Jun	0.29281		Bmpr1a	Jun	0.127589
Bmpr1a	Mapk1	0.0260575		Bmpr1a	Mapk1	0.100601		Bmpr1a	Mapk1	0.0766066		Bmpr1a	Mapk1	0.0250369
Bmpr1a	Mapk12	0.6003		Bmpr1a	Mapk12	0.612741		Bmpr1a	Mapk12	0.416283		Bmpr1a	Mapk12	0.0590074
Bmpr1a	Mapk4	0.130739		Bmpr1a	Mapk4	0.0629577		Bmpr1a	Mapk4	0.0400777		Bmpr1a	Mapk4	0.214657
Bmpr1a	Mapk6	0.314993		Bmpr1a	Mapk6	0.949804		Bmpr1a	Mapk6	0.979664		Bmpr1a	Mapk6	0.339891
Bmpr1a	Mapk7	0.536633		Bmpr1a	Mapk7	0.6445		Bmpr1a	Mapk7	0.249573		Bmpr1a	Mapk7	0.0769462
Bmpr1a	Smad4	0.568685		Bmpr1a	Smad4	0.0407224		Bmpr1a	Smad4	0.175092		Bmpr1a	Smad4	0.216499
Bmpr1a	Smad9	0.0700549		Bmpr1a	Smad9	0.0412652		Bmpr1a	Smad9	0.0379413		Bmpr1a	Smad9	0.264896
Bmpr1b	Actr2	0.0309574		Bmpr1b	Actr2	0.768378		Bmpr1b	Actr2	0.114439		Bmpr1b	Actr2	0.0327924
Bmpr1b	Acvr2b	0.0722578		Bmpr1b	Acvr2b	0.995612		Bmpr1b	Acvr2b	0.957119		Bmpr1b	Acvr2b	0.0464405
Bmpr1b	Bmp4	0.0693182		Bmpr1b	Bmp4	0.0879535		Bmpr1b	Bmp4	0.116818		Bmpr1b	Bmp4	0.0632553
Bmpr1b	Bmpr2	0.0136864		Bmpr1b	Bmpr2	0.0259074		Bmpr1b	Bmpr2	0.0512828		Bmpr1b	Bmpr2	0.198239
Bmpr1b	Ephb1	0.0696079		Bmpr1b	Ephb1	0.0240435		Bmpr1b	Ephb1	0.0700844		Bmpr1b	Ephb1	0.013051
Bmpr1b	Fos	0.0482181		Bmpr1b	Fos	0.107467		Bmpr1b	Fos	0.0685181		Bmpr1b	Fos	0.0243296
Bmpr1b	Jun	0.0118453		Bmpr1b	Jun	0.0198023		Bmpr1b	Jun	0.186577		Bmpr1b	Jun	0.445005
Bmpr1b	Mapk1	0.152051		Bmpr1b	Mapk1	0.131523		Bmpr1b	Mapk1	0.136018		Bmpr1b	Mapk1	0.163393
Bmpr1b	Mapk12	0.167323		Bmpr1b	Mapk12	0.148796		Bmpr1b	Mapk12	0.0947282		Bmpr1b	Mapk12	0.139562
Bmpr1b	Mapk4	0.726782		Bmpr1b	Mapk4	0.399458		Bmpr1b	Mapk4	0.796416		Bmpr1b	Mapk4	0.0267515
Bmpr1b	Mapk6	0.0376793		Bmpr1b	Mapk6	0.0925523		Bmpr1b	Mapk6	0.101282		Bmpr1b	Mapk6	0.172955
Bmpr1b	Mapk7	0.0372241		Bmpr1b	Mapk7	0.0204982		Bmpr1b	Mapk7	0.0196248		Bmpr1b	Mapk7	0.0438512
Bmpr1b	Smad1	0.493965		Bmpr1b	Smad1	0.336267		Bmpr1b	Smad1	0.336329		Bmpr1b	Smad1	0.093415
Bmpr1b	Smad4	0.399084		Bmpr1b	Smad4	0.0747226		Bmpr1b	Smad4	0.291088		Bmpr1b	Smad4	0.0326666
Bmpr1b	Smad5	0.145627		Bmpr1b	Smad5	0.0894712		Bmpr1b	Smad5	0.111806		Bmpr1b	Smad5	0.13609
Bmpr1b	Smad9	0.704594		Bmpr1b	Smad9	0.076459		Bmpr1b	Smad9	0.0587709		Bmpr1b	Smad9	0.181774
Bmpr2	Acvr1	0.840585		Bmpr2	Acvr1	0.414582		Bmpr2	Acvr1	0.283522		Bmpr2	Acvr1	0.456874
Bmpr2	Bmp4	0.335006		Bmpr2	Bmp4	0.0234182		Bmpr2	Bmp4	0.0446135		Bmpr2	Bmp4	0.148369
Bmpr2	Bmpr1a	0.0843456		Bmpr2	Bmpr1a	0.774843		Bmpr2	Bmpr1a	0.395889		Bmpr2	Bmpr1a	0.0839435
Bmpr2	Ephb1	0.604038		Bmpr2	Ephb1	0.0634343		Bmpr2	Ephb1	0.150808		Bmpr2	Ephb1	0.171712
Bmpr2	Fos	0.312608		Bmpr2	Fos	0.421061		Bmpr2	Fos	0.115894		Bmpr2	Fos	0.0701736
Bmpr2	Jun	0.0368721		Bmpr2	Jun	0.0670154		Bmpr2	Jun	0.0776639		Bmpr2	Jun	0.0535576
Bmpr2	Mapk1	0.681427		Bmpr2	Mapk1	0.991744		Bmpr2	Mapk1	0.92053		Bmpr2	Mapk1	0.0482558
Bmpr2	Mapk12	0.0508171		Bmpr2	Mapk12	0.574711		Bmpr2	Mapk12	0.303275		Bmpr2	Mapk12	0.146297
Bmpr2	Mapk4	0.602584		Bmpr2	Mapk4	0.10739		Bmpr2	Mapk4	0.0760865		Bmpr2	Mapk4	0.137008
Bmpr2	Mapk6	0.0850064		Bmpr2	Mapk6	0.139532		Bmpr2	Mapk6	0.0987503		Bmpr2	Mapk6	0.13272
Bmpr2	Mapk7	0.705829		Bmpr2	Mapk7	0.197713		Bmpr2	Mapk7	0.476547		Bmpr2	Mapk7	0.281443
Bmpr2	Smad4	0.57118		Bmpr2	Smad4	0.471543		Bmpr2	Smad4	0.353117		Bmpr2	Smad4	0.0667543
Bmpr2	Smad5	0.808306		Bmpr2	Smad5	0.942528		Bmpr2	Smad5	0.665881		Bmpr2	Smad5	0.165534
Bmpr2	Smad9	0.0705671		Bmpr2	Smad9	0.0350207		Bmpr2	Smad9	0.0703122		Bmpr2	Smad9	0.0537653
Braf	Egf	0.0232542		Braf	Egf	0.103138		Braf	Egf	0.0156365		Braf	Egf	0.0234382
Braf	Egfr	0.705768		Braf	Egfr	0.688363		Braf	Egfr	0.865802		Braf	Egfr	0.385424
Braf	Fgf1	0.597916		Braf	Fgf1	0.482088		Braf	Fgf1	0.600344		Braf	Fgf1	0.283224
Braf	Fgf2	0.733568		Braf	Fgf2	0.529804		Braf	Fgf2	0.437146		Braf	Fgf2	0.322777
Braf	Fgf3	0.53548		Braf	Fgf3	0.48449		Braf	Fgf3	0.380641		Braf	Fgf3	0.303439
Braf	Fgf4	0.0891933		Braf	Fgf4	0.731666		Braf	Fgf4	0.397391		Braf	Fgf4	0.112911
Braf	Fgf5	0.223292		Braf	Fgf5	0.413924		Braf	Fgf5	0.0940275		Braf	Fgf5	0.097507
Braf	Fgf6	0.580521		Braf	Fgf6	0.188526		Braf	Fgf6	0.108414		Braf	Fgf6	0.0687006
Braf	Fgf7	0.550494		Braf	Fgf7	0.57422		Braf	Fgf7	0.105973		Braf	Fgf7	0.032873
Braf	Fgf8	0.0181383		Braf	Fgf8	0.0256419		Braf	Fgf8	0.0407449		Braf	Fgf8	0.191004
Braf	Fgfr1	0.315555		Braf	Fgfr1	0.463289		Braf	Fgfr1	0.556		Braf	Fgfr1	0.12786
Braf	Fgfr2	0.0463404		Braf	Fgfr2	0.986695		Braf	Fgfr2	0.98267		Braf	Fgfr2	0.0933178
Braf	Fgfr3	0.803249		Braf	Fgfr3	0.274835		Braf	Fgfr3	0.41772		Braf	Fgfr3	0.0429208
Braf	Fgfr4	0.0466587		Braf	Fgfr4	0.245863		Braf	Fgfr4	0.295844		Braf	Fgfr4	0.0707422
Braf	Fos	0.364445		Braf	Fos	0.101931		Braf	Fos	0.0843493		Braf	Fos	0.110302
Braf	Jak1	0.680432		Braf	Jak1	0.469417		Braf	Jak1	0.504485		Braf	Jak1	0.0279323
Braf	Jun	0.116857		Braf	Jun	0.0947713		Braf	Jun	0.157325		Braf	Jun	0.0743615
Braf	Lif	0.100539		Braf	Lif	0.298603		Braf	Lif	0.377679		Braf	Lif	0.124905
Braf	Lifr	0.128543		Braf	Lifr	0.584549		Braf	Lifr	0.389894		Braf	Lifr	0.176583
Braf	Ptpn11	0.022665		Braf	Ptpn11	0.28045		Braf	Ptpn11	0.130815		Braf	Ptpn11	0.103359
Braf	Sepp1	0.012778		Braf	Sepp1	0.0563614		Braf	Sepp1	0.227625		Braf	Sepp1	0.195297
Braf	Sos1	0.0418495		Braf	Sos1	0.139648		Braf	Sos1	0.148135		Braf	Sos1	0.305116
Casp3	Nanog	0.0871548		Casp3	Nanog	0.431304		Casp3	Nanog	0.536298		Casp3	Nanog	0.449697
Casp3	Thap11	0.0176795		Casp3	Thap11	0.0617476		Casp3	Thap11	0.0949211		Casp3	Thap11	0.0366948
Cbx2	Sox2	0.0101371		Cbx2	Sox2	0.169792		Cbx2	Sox2	0.330574		Cbx2	Sox2	0.148155
Cbx2	Yy1	0.0856256		Cbx2	Yy1	0.123171		Cbx2	Yy1	0.0904304		Cbx2	Yy1	0.334111
Cbx4	Yy1	0.187494		Cbx4	Yy1	0.142641		Cbx4	Yy1	0.28028		Cbx4	Yy1	0.113322
Cbx8	Nanog	0.0681547		Cbx8	Nanog	0.552523		Cbx8	Nanog	0.250742		Cbx8	Nanog	0.0990493
Cbx8	Sox2	0.0124649		Cbx8	Sox2	0.0181301		Cbx8	Sox2	0.0517159		Cbx8	Sox2	0.113565
Ccnd1	Ptpn11	0.969517		Ccnd1	Ptpn11	1		Ccnd1	Ptpn11	0.999998		Ccnd1	Ptpn11	0.311496
Ccnd1	Shh	0.113535		Ccnd1	Shh	0.34345		Ccnd1	Shh	0.549541		Ccnd1	Shh	0.110022
Ccnd2	Ptpn11	0.0681806		Ccnd2	Ptpn11	0.823618		Ccnd2	Ptpn11	0.631808		Ccnd2	Ptpn11	0.698868
Ccnd3	Ptpn11	0.178704		Ccnd3	Ptpn11	0.114688		Ccnd3	Ptpn11	0.0711256		Ccnd3	Ptpn11	0.0527839
Ccnd3	Shh	0.748192		Ccnd3	Shh	0.0488656		Ccnd3	Shh	0.101967		Ccnd3	Shh	0.171682
Ccne1	Lif	0.0525424		Ccne1	Lif	0.0432454		Ccne1	Lif	0.039364		Ccne1	Lif	0.0312422
Ccne1	Myc	0.0702964		Ccne1	Myc	0.0245089		Ccne1	Myc	0.0149552		Ccne1	Myc	0.41627
Ccne1	Pim1	0.422176		Ccne1	Pim1	0.999803		Ccne1	Pim1	0.998994		Ccne1	Pim1	0.462412
Ccne1	Shh	0.018036		Ccne1	Shh	0.0136777		Ccne1	Shh	0.0107616		Ccne1	Shh	0.0985697
Cd9	Il6st	0.0679802		Cd9	Il6st	0.224224		Cd9	Il6st	0.378403		Cd9	Il6st	0.131474
Cd9	Lif	0.101214		Cd9	Lif	0.166566		Cd9	Lif	0.0489469		Cd9	Lif	0.0303202
Cd9	Lifr	0.0896006		Cd9	Lifr	0.0471594		Cd9	Lifr	0.057977		Cd9	Lifr	0.212942
Cdc25a	Ccne1	0.0225988		Cdc25a	Ccne1	0.0319229		Cdc25a	Ccne1	0.0518582		Cdc25a	Ccne1	0.0706983
Cdc25a	Cdk2	0.111407		Cdc25a	Cdk2	0.0500557		Cdc25a	Cdk2	0.0489658		Cdc25a	Cdk2	0.101475
Cdc25a	Lif	0.0147012		Cdc25a	Lif	0.0768701		Cdc25a	Lif	0.07366		Cdc25a	Lif	0.0646866
Cdc25a	Myc	0.0400479		Cdc25a	Myc	0.0803716		Cdc25a	Myc	0.129007		Cdc25a	Myc	0.389752
Cdk2	Ccna2	0.0742723		Cdk2	Ccna2	0.102042		Cdk2	Ccna2	0.0765017		Cdk2	Ccna2	0.0620657
Cdk2	Ccne1	0.0187522		Cdk2	Ccne1	0.0348378		Cdk2	Ccne1	0.0411034		Cdk2	Ccne1	0.0643795
Cdk2	E2f2	0.139893		Cdk2	E2f2	0.0396835		Cdk2	E2f2	0.041217		Cdk2	E2f2	0.0444414
Cdk2	E2f3	0.0211039		Cdk2	E2f3	0.108602		Cdk2	E2f3	0.131962		Cdk2	E2f3	0.202724
Cdk2	E2f5	0.110488		Cdk2	E2f5	0.0613613		Cdk2	E2f5	0.0636769		Cdk2	E2f5	0.0694511
Cdk2	E2f6	0.094565		Cdk2	E2f6	0.0483346		Cdk2	E2f6	0.151309		Cdk2	E2f6	0.073218
Cdk2	E2f7	0.10492		Cdk2	E2f7	0.0190167		Cdk2	E2f7	0.0290385		Cdk2	E2f7	0.080713
Cdk2	E2f8	0.0383495		Cdk2	E2f8	0.0510274		Cdk2	E2f8	0.0377191		Cdk2	E2f8	0.14659
Cdk2	Eef2	0.0439104		Cdk2	Eef2	0.0981454		Cdk2	Eef2	0.152904		Cdk2	Eef2	0.105144
Cdk2	Lif	0.0262996		Cdk2	Lif	0.0452635		Cdk2	Lif	0.0433114		Cdk2	Lif	0.0913891
Cdk2	Myc	0.0108756		Cdk2	Myc	0.0449048		Cdk2	Myc	0.0429674		Cdk2	Myc	0.194125
Cdk2	Pim1	0.105053		Cdk2	Pim1	0.0414878		Cdk2	Pim1	0.0625961		Cdk2	Pim1	0.127448
Cdk2	Shh	0.12918		Cdk2	Shh	0.128288		Cdk2	Shh	0.119314		Cdk2	Shh	0.110392
Cdk2	Smo	0.0358865		Cdk2	Smo	0.0867671		Cdk2	Smo	0.0899496		Cdk2	Smo	0.0425803
Cdk4	Ptpn11	0.033009		Cdk4	Ptpn11	0.0284076		Cdk4	Ptpn11	0.0208689		Cdk4	Ptpn11	0.190075
Cdk4	Shh	0.0545646		Cdk4	Shh	0.0449931		Cdk4	Shh	0.0332035		Cdk4	Shh	0.0820345
Cdk6	Ptpn11	0.125645		Cdk6	Ptpn11	0.196334		Cdk6	Ptpn11	0.0592682		Cdk6	Ptpn11	0.108476
Cdkn1a	Trp53	0.0913621		Cdkn1a	Trp53	0.225883		Cdkn1a	Trp53	0.133937		Cdkn1a	Trp53	0.0315989
Cdkn1b	Ccnd1	0.197229		Cdkn1b	Ccnd1	0.175705		Cdkn1b	Ccnd1	0.203524		Cdkn1b	Ccnd1	0.0625523
Cdkn1b	Ccnd2	0.0856379		Cdkn1b	Ccnd2	0.246642		Cdkn1b	Ccnd2	0.264809		Cdkn1b	Ccnd2	0.0505479
Cdkn1b	Ccnd3	0.0629213		Cdkn1b	Ccnd3	0.0199709		Cdkn1b	Ccnd3	0.0508987		Cdkn1b	Ccnd3	0.0545471
Cdkn1b	Cdk4	0.0462658		Cdkn1b	Cdk4	0.0227692		Cdkn1b	Cdk4	0.0216391		Cdkn1b	Cdk4	0.136534
Cdkn1b	Cdk6	0.0591831		Cdkn1b	Cdk6	0.12886		Cdkn1b	Cdk6	0.0973342		Cdkn1b	Cdk6	0.0276343
Cdkn1b	Pten	0.0870486		Cdkn1b	Pten	0.0552769		Cdkn1b	Pten	0.133436		Cdkn1b	Pten	0.0878126
Cdkn2a	Ccnd1	0.55784		Cdkn2a	Ccnd1	0.210431		Cdkn2a	Ccnd1	0.20943		Cdkn2a	Ccnd1	0.101927
Cdkn2a	Ccnd2	0.198433		Cdkn2a	Ccnd2	0.0252097		Cdkn2a	Ccnd2	0.0892698		Cdkn2a	Ccnd2	0.298706
Cdkn2a	Ccnd3	0.221934		Cdkn2a	Ccnd3	0.11093		Cdkn2a	Ccnd3	0.0620268		Cdkn2a	Ccnd3	0.0471791
Cdkn2a	Cdk4	0.120658		Cdkn2a	Cdk4	0.111117		Cdkn2a	Cdk4	0.0794239		Cdkn2a	Cdk4	0.0424867
Cdkn2a	Cdk6	0.0503294		Cdkn2a	Cdk6	0.0360482		Cdkn2a	Cdk6	0.0362804		Cdkn2a	Cdk6	0.0541725
Cdx2	Eed	0.0932733		Cdx2	Eed	0.0241993		Cdx2	Eed	0.0229999		Cdx2	Eed	0.113625
Cdx2	Gabpa	0.150976		Cdx2	Gabpa	0.43221		Cdx2	Gabpa	0.473485		Cdx2	Gabpa	0.160904
Chd3	Sall4	0.166281		Chd3	Sall4	0.0691205		Chd3	Sall4	0.0913961		Chd3	Sall4	0.0640119
Cnot3	Sox2	0.125929		Cnot3	Sox2	0.389637		Cnot3	Sox2	0.251683		Cnot3	Sox2	0.0391234
Cobra1	Lef1	0.161572		Cobra1	Lef1	0.313171		Cobra1	Lef1	0.43777		Cobra1	Lef1	0.0390101
Crebbp	Ctnnb1	0.126058		Crebbp	Ctnnb1	0.0499131		Crebbp	Ctnnb1	0.0475012		Crebbp	Ctnnb1	0.0244486
Crebbp	Hnf1a	0.0274446		Crebbp	Hnf1a	0.129699		Crebbp	Hnf1a	0.0728013		Crebbp	Hnf1a	0.11713
Crebbp	Hnf1b	0.0924494		Crebbp	Hnf1b	0.58535		Crebbp	Hnf1b	0.427978		Crebbp	Hnf1b	0.124639
Crebbp	Nanog	0.411243		Crebbp	Nanog	0.0506268		Crebbp	Nanog	0.168134		Crebbp	Nanog	0.0492579
Crebbp	Sox2	0.197301		Crebbp	Sox2	0.316794		Crebbp	Sox2	0.197273		Crebbp	Sox2	0.0427529
Crebbp	Tcf3	0.439124		Crebbp	Tcf3	0.0209765		Crebbp	Tcf3	0.0751087		Crebbp	Tcf3	0.0738567
Ctcf	Yy1	0.0700726		Ctcf	Yy1	0.246318		Ctcf	Yy1	0.395634		Ctcf	Yy1	0.198793
Ctgf	Sox15	0.273901		Ctgf	Sox15	0.103559		Ctgf	Sox15	0.104611		Ctgf	Sox15	0.327357
Ctnnb1	Gli1	0.30215		Ctnnb1	Gli1	0.29242		Ctnnb1	Gli1	0.364014		Ctnnb1	Gli1	0.482782
Ctnnb1	Hnf1b	0.274168		Ctnnb1	Hnf1b	0.143339		Ctnnb1	Hnf1b	0.11626		Ctnnb1	Hnf1b	0.464942
Ctnnb1	Lef1	0.166722		Ctnnb1	Lef1	0.0566797		Ctnnb1	Lef1	0.13144		Ctnnb1	Lef1	0.314754
Ctnnb1	Sox2	0.53701		Ctnnb1	Sox2	0.110048		Ctnnb1	Sox2	0.11483		Ctnnb1	Sox2	0.142111
Ctnnb1	Tcf3	0.923946		Ctnnb1	Tcf3	0.449717		Ctnnb1	Tcf3	0.449884		Ctnnb1	Tcf3	0.463391
Ctnnb1	Tcf4	0.0377976		Ctnnb1	Tcf4	0.615903		Ctnnb1	Tcf4	0.0369786		Ctnnb1	Tcf4	0.149832
Dgcr8	Afp	0.0284928		Dgcr8	Afp	0.0750855		Dgcr8	Afp	0.0912977		Dgcr8	Afp	0.0317045
Dgcr8	Fgf5	0.776772		Dgcr8	Fgf5	0.674767		Dgcr8	Fgf5	0.431509		Dgcr8	Fgf5	0.167157
Dgcr8	Sox1	0.174409		Dgcr8	Sox1	0.139563		Dgcr8	Sox1	0.0356192		Dgcr8	Sox1	0.214448
Dgcr8	T	0.82044		Dgcr8	T	0.728187		Dgcr8	T	0.735791		Dgcr8	T	0.0694386
Dicer1	Zcchc11	0.0521454		Dicer1	Zcchc11	0.428166		Dicer1	Zcchc11	0.0354056		Dicer1	Zcchc11	0.0563379
Dnmt3a	Ehmt2	0.167081		Dnmt3a	Ehmt2	0.0547398		Dnmt3a	Ehmt2	0.0534855		Dnmt3a	Ehmt2	0.0263555
Dnmt3a	Nanog	0.775905		Dnmt3a	Nanog	0.570271		Dnmt3a	Nanog	0.0947189		Dnmt3a	Nanog	0.0752905
Dnmt3b	Ehmt2	0.113391		Dnmt3b	Ehmt2	0.735715		Dnmt3b	Ehmt2	0.136443		Dnmt3b	Ehmt2	0.0698388
Dnmt3b	Nanog	0.0213719		Dnmt3b	Nanog	0.00520579		Dnmt3b	Nanog	0.00438603		Dnmt3b	Nanog	0.0244144
Dppa5a	Lif	0.0993862		Dppa5a	Lif	0.411436		Dppa5a	Lif	0.12216		Dppa5a	Lif	0.138747
Dppa5a	Stat3	0.156346		Dppa5a	Stat3	0.378879		Dppa5a	Stat3	0.251528		Dppa5a	Stat3	0.144118
Dusp6	Fos	0.999163		Dusp6	Fos	0.272715		Dusp6	Fos	0.205281		Dusp6	Fos	0.28057
Dusp6	Jun	0.238074		Dusp6	Jun	0.261518		Dusp6	Jun	0.182082		Dusp6	Jun	0.0409084
Dusp6	Mapk4	0.398602		Dusp6	Mapk4	0.505718		Dusp6	Mapk4	0.659344		Dusp6	Mapk4	0.207676
Dvl1	Wnt1	0.638395		Dvl1	Wnt1	0.121284		Dvl1	Wnt1	0.288057		Dvl1	Wnt1	0.0506182
Dvl1	Wnt2	0.825694		Dvl1	Wnt2	0.0769282		Dvl1	Wnt2	0.0843129		Dvl1	Wnt2	0.0715233
Dvl1	Wnt3	0.999379		Dvl1	Wnt3	0.381865		Dvl1	Wnt3	0.168965		Dvl1	Wnt3	0.0656622
Dvl1	Wnt3a	0.670074		Dvl1	Wnt3a	0.0277285		Dvl1	Wnt3a	0.0124128		Dvl1	Wnt3a	0.0603522
Dvl1	Wnt4	0.981042		Dvl1	Wnt4	0.272346		Dvl1	Wnt4	0.324375		Dvl1	Wnt4	0.166401
Dvl1	Wnt5a	0.480978		Dvl1	Wnt5a	0.551447		Dvl1	Wnt5a	0.733414		Dvl1	Wnt5a	0.100967
Dvl1	Wnt5b	0.99989		Dvl1	Wnt5b	0.185149		Dvl1	Wnt5b	0.794032		Dvl1	Wnt5b	0.765789
Dvl1	Wnt7a	0.43532		Dvl1	Wnt7a	0.220297		Dvl1	Wnt7a	0.30882		Dvl1	Wnt7a	0.0602569
Dvl1	Wnt7b	0.988663		Dvl1	Wnt7b	0.109068		Dvl1	Wnt7b	0.111242		Dvl1	Wnt7b	0.217981
Dvl2	Axin1	0.193111		Dvl2	Axin1	0.0145858		Dvl2	Axin1	0.00883931		Dvl2	Axin1	0.079625
Dvl2	Dvl1	0.72301		Dvl2	Dvl1	0.503957		Dvl2	Dvl1	0.110048		Dvl2	Dvl1	0.0441561
Dvl2	Dvl3	0.855196		Dvl2	Dvl3	0.293698		Dvl2	Dvl3	0.218592		Dvl2	Dvl3	0.189847
Dvl2	Fzd1	0.90352		Dvl2	Fzd1	0.590398		Dvl2	Fzd1	0.469821		Dvl2	Fzd1	0.0465176
Dvl2	Fzd2	0.756341		Dvl2	Fzd2	0.936649		Dvl2	Fzd2	0.857982		Dvl2	Fzd2	0.119744
Dvl2	Fzd3	0.684908		Dvl2	Fzd3	0.500654		Dvl2	Fzd3	0.361397		Dvl2	Fzd3	0.245782
Dvl2	Fzd4	0.973003		Dvl2	Fzd4	0.671313		Dvl2	Fzd4	0.597704		Dvl2	Fzd4	0.164101
Dvl2	Fzd5	0.989307		Dvl2	Fzd5	0.708519		Dvl2	Fzd5	0.54796		Dvl2	Fzd5	0.33251
Dvl2	Fzd6	0.585557		Dvl2	Fzd6	0.0289138		Dvl2	Fzd6	0.049336		Dvl2	Fzd6	0.252034
Dvl2	Fzd7	0.980014		Dvl2	Fzd7	0.227954		Dvl2	Fzd7	0.322845		Dvl2	Fzd7	0.148726
Dvl2	Fzd8	0.038201		Dvl2	Fzd8	0.0245484		Dvl2	Fzd8	0.0248201		Dvl2	Fzd8	0.0933827
Dvl2	Fzd9	0.0584004		Dvl2	Fzd9	0.240636		Dvl2	Fzd9	0.138281		Dvl2	Fzd9	0.0926509
Dvl2	Gsk3b	0.594336		Dvl2	Gsk3b	0.0356601		Dvl2	Gsk3b	0.0393967		Dvl2	Gsk3b	0.161899
Dvl2	Lrp5	0.133495		Dvl2	Lrp5	0.186517		Dvl2	Lrp5	0.109524		Dvl2	Lrp5	0.154109
Dvl2	Lrp6	0.0330171		Dvl2	Lrp6	0.129177		Dvl2	Lrp6	0.130452		Dvl2	Lrp6	0.0643591
Dvl2	Wnt1	0.614403		Dvl2	Wnt1	0.0639196		Dvl2	Wnt1	0.160512		Dvl2	Wnt1	0.128918
Dvl2	Wnt10a	0.138823		Dvl2	Wnt10a	0.0538297		Dvl2	Wnt10a	0.0532676		Dvl2	Wnt10a	0.241822
Dvl2	Wnt10b	0.0905877		Dvl2	Wnt10b	0.482702		Dvl2	Wnt10b	0.0696043		Dvl2	Wnt10b	0.11217
Dvl2	Wnt2	0.177713		Dvl2	Wnt2	0.570481		Dvl2	Wnt2	0.495868		Dvl2	Wnt2	0.103739
Dvl2	Wnt2b	0.857122		Dvl2	Wnt2b	0.847588		Dvl2	Wnt2b	0.580659		Dvl2	Wnt2b	0.35437
Dvl2	Wnt3	0.072196		Dvl2	Wnt3	0.28174		Dvl2	Wnt3	0.113187		Dvl2	Wnt3	0.239221
Dvl2	Wnt3a	0.330093		Dvl2	Wnt3a	0.19592		Dvl2	Wnt3a	0.105564		Dvl2	Wnt3a	0.172572
Dvl2	Wnt4	0.128755		Dvl2	Wnt4	0.744845		Dvl2	Wnt4	0.262296		Dvl2	Wnt4	0.194369
Dvl2	Wnt5a	0.0522356		Dvl2	Wnt5a	0.2077		Dvl2	Wnt5a	0.0742095		Dvl2	Wnt5a	0.0488839
Dvl2	Wnt5b	0.0584545		Dvl2	Wnt5b	0.139117		Dvl2	Wnt5b	0.0829481		Dvl2	Wnt5b	0.248921
Dvl2	Wnt7a	0.457057		Dvl2	Wnt7a	0.184916		Dvl2	Wnt7a	0.143863		Dvl2	Wnt7a	0.0434027
Dvl2	Wnt7b	0.621135		Dvl2	Wnt7b	0.722249		Dvl2	Wnt7b	0.53679		Dvl2	Wnt7b	0.065464
Dvl3	Axin1	0.124454		Dvl3	Axin1	0.251032		Dvl3	Axin1	0.153918		Dvl3	Axin1	0.102894
Dvl3	Dvl1	0.850452		Dvl3	Dvl1	0.449681		Dvl3	Dvl1	0.40652		Dvl3	Dvl1	0.105228
Dvl3	Fzd1	0.18346		Dvl3	Fzd1	0.297096		Dvl3	Fzd1	0.781614		Dvl3	Fzd1	0.31236
Dvl3	Fzd2	0.714606		Dvl3	Fzd2	0.0363245		Dvl3	Fzd2	0.0480488		Dvl3	Fzd2	0.148069
Dvl3	Fzd3	0.137326		Dvl3	Fzd3	0.521514		Dvl3	Fzd3	0.221067		Dvl3	Fzd3	0.161718
Dvl3	Fzd4	0.804975		Dvl3	Fzd4	0.938625		Dvl3	Fzd4	0.915918		Dvl3	Fzd4	0.41586
Dvl3	Fzd5	0.506313		Dvl3	Fzd5	0.746458		Dvl3	Fzd5	0.846498		Dvl3	Fzd5	0.400258
Dvl3	Fzd6	0.687748		Dvl3	Fzd6	0.331994		Dvl3	Fzd6	0.340814		Dvl3	Fzd6	0.0786917
Dvl3	Fzd7	0.574095		Dvl3	Fzd7	0.217338		Dvl3	Fzd7	0.446189		Dvl3	Fzd7	0.222149
Dvl3	Fzd8	0.69102		Dvl3	Fzd8	0.484563		Dvl3	Fzd8	0.262905		Dvl3	Fzd8	0.209266
Dvl3	Fzd9	0.309129		Dvl3	Fzd9	0.0798106		Dvl3	Fzd9	0.125766		Dvl3	Fzd9	0.0945501
Dvl3	Gsk3b	0.334107		Dvl3	Gsk3b	0.347331		Dvl3	Gsk3b	0.31242		Dvl3	Gsk3b	0.243201
Dvl3	Lrp5	0.0292313		Dvl3	Lrp5	0.0643601		Dvl3	Lrp5	0.051199		Dvl3	Lrp5	0.151321
Dvl3	Lrp6	0.111092		Dvl3	Lrp6	0.311903		Dvl3	Lrp6	0.0775387		Dvl3	Lrp6	0.0573001
Dvl3	Wnt1	0.904274		Dvl3	Wnt1	0.554118		Dvl3	Wnt1	0.858227		Dvl3	Wnt1	0.345049
Dvl3	Wnt2	0.292391		Dvl3	Wnt2	0.709674		Dvl3	Wnt2	0.297326		Dvl3	Wnt2	0.0595206
Dvl3	Wnt2b	0.337602		Dvl3	Wnt2b	0.712453		Dvl3	Wnt2b	0.324836		Dvl3	Wnt2b	0.0635334
Dvl3	Wnt3	0.272274		Dvl3	Wnt3	0.3194		Dvl3	Wnt3	0.191319		Dvl3	Wnt3	0.017387
Dvl3	Wnt3a	0.583426		Dvl3	Wnt3a	0.527051		Dvl3	Wnt3a	0.685771		Dvl3	Wnt3a	0.0878602
Dvl3	Wnt4	0.71246		Dvl3	Wnt4	0.0602284		Dvl3	Wnt4	0.0851442		Dvl3	Wnt4	0.0472887
Dvl3	Wnt5a	0.0591122		Dvl3	Wnt5a	0.721362		Dvl3	Wnt5a	0.107262		Dvl3	Wnt5a	0.0613715
Dvl3	Wnt5b	0.166717		Dvl3	Wnt5b	0.0693215		Dvl3	Wnt5b	0.111621		Dvl3	Wnt5b	0.16167
Dvl3	Wnt7a	0.962411		Dvl3	Wnt7a	0.589215		Dvl3	Wnt7a	0.638988		Dvl3	Wnt7a	0.320155
Dvl3	Wnt7b	0.928381		Dvl3	Wnt7b	0.50301		Dvl3	Wnt7b	0.541205		Dvl3	Wnt7b	0.187089
E2f1	Ccne1	0.425002		E2f1	Ccne1	0.428445		E2f1	Ccne1	0.141544		E2f1	Ccne1	0.148977
E2f1	Cdk2	0.945716		E2f1	Cdk2	0.657203		E2f1	Cdk2	0.804262		E2f1	Cdk2	0.261868
E2f1	Myc	0.142605		E2f1	Myc	0.0437556		E2f1	Myc	0.0571562		E2f1	Myc	0.0931384
E2f1	Mycn	0.22847		E2f1	Mycn	0.129179		E2f1	Mycn	0.176034		E2f1	Mycn	0.107801
E2f1	Rb1	0.0458777		E2f1	Rb1	0.0842319		E2f1	Rb1	0.0657404		E2f1	Rb1	0.193609
E2f1	Zfx	0.297629		E2f1	Zfx	0.420535		E2f1	Zfx	0.191492		E2f1	Zfx	0.0927658
E2f2	Ccne1	0.22016		E2f2	Ccne1	0.209283		E2f2	Ccne1	0.162911		E2f2	Ccne1	0.108561
E2f2	Rb1	0.98841		E2f2	Rb1	0.281371		E2f2	Rb1	0.172527		E2f2	Rb1	0.123085
E2f3	Ccne1	0.778189		E2f3	Ccne1	0.462486		E2f3	Ccne1	0.55551		E2f3	Ccne1	0.147812
E2f3	Rb1	0.387912		E2f3	Rb1	0.879751		E2f3	Rb1	0.157033		E2f3	Rb1	0.0415032
E2f4	Ccne1	0.838799		E2f4	Ccne1	0.190146		E2f4	Ccne1	0.503786		E2f4	Ccne1	0.260618
E2f4	Cdk2	0.390629		E2f4	Cdk2	0.711392		E2f4	Cdk2	0.283488		E2f4	Cdk2	0.153588
E2f4	Rb1	0.107161		E2f4	Rb1	0.949454		E2f4	Rb1	0.374341		E2f4	Rb1	0.110345
E2f5	Ccne1	0.242008		E2f5	Ccne1	0.807222		E2f5	Ccne1	0.684464		E2f5	Ccne1	0.287463
E2f5	Rb1	0.0221483		E2f5	Rb1	0.0479551		E2f5	Rb1	0.0490843		E2f5	Rb1	0.0381357
E2f6	Ccne1	0.659693		E2f6	Ccne1	0.187655		E2f6	Ccne1	0.118977		E2f6	Ccne1	0.0573599
E2f6	Rb1	0.190363		E2f6	Rb1	0.297954		E2f6	Rb1	0.424114		E2f6	Rb1	0.118316
E2f7	Ccne1	0.602073		E2f7	Ccne1	0.2169		E2f7	Ccne1	0.261379		E2f7	Ccne1	0.129507
E2f7	Rb1	0.337894		E2f7	Rb1	0.224974		E2f7	Rb1	0.11408		E2f7	Rb1	0.306849
E2f8	Ccne1	0.42534		E2f8	Ccne1	0.368094		E2f8	Ccne1	0.638418		E2f8	Ccne1	0.0933343
E2f8	Rb1	0.165226		E2f8	Rb1	0.176132		E2f8	Rb1	0.128068		E2f8	Rb1	0.17429
Eed	Gata4	0.0149119		Eed	Gata4	0.0853072		Eed	Gata4	0.154116		Eed	Gata4	0.163776
Eed	Kdr	0.107183		Eed	Kdr	0.332694		Eed	Kdr	0.137215		Eed	Kdr	0.0622419
Eed	Msx1	0.336688		Eed	Msx1	0.316836		Eed	Msx1	0.536852		Eed	Msx1	0.0797943
Eed	Nkx2-2	0.0666712		Eed	Nkx2-2	0.35379		Eed	Nkx2-2	0.247144		Eed	Nkx2-2	0.0370736
Eed	Pax3	0.0319926		Eed	Pax3	0.0755832		Eed	Pax3	0.024281		Eed	Pax3	0.0556942
Eed	Xist	0.0930773		Eed	Xist	0.128222		Eed	Xist	0.259059		Eed	Xist	0.250629
Eed	Zfp42	0.164657		Eed	Zfp42	0.0478245		Eed	Zfp42	0.0563247		Eed	Zfp42	0.146213
Egf	Egfr	0.0511316		Egf	Egfr	0.100696		Egf	Egfr	0.179175		Egf	Egfr	0.0857362
Egf	Fos	0.0635012		Egf	Fos	0.0588907		Egf	Fos	0.102696		Egf	Fos	0.0565884
Egf	Grb2	0.019651		Egf	Grb2	0.205287		Egf	Grb2	0.0807688		Egf	Grb2	0.148166
Egf	Hras1	0.0574801		Egf	Hras1	0.260391		Egf	Hras1	0.175962		Egf	Hras1	0.0406467
Egf	Jun	0.056643		Egf	Jun	0.040484		Egf	Jun	0.0255453		Egf	Jun	0.0767465
Egf	Raf1	0.0182736		Egf	Raf1	0.143739		Egf	Raf1	0.0787951		Egf	Raf1	0.106293
Egf	Sos1	0.426997		Egf	Sos1	0.61348		Egf	Sos1	0.445523		Egf	Sos1	0.0128219
Egfr	Fos	0.0480423		Egfr	Fos	0.150578		Egfr	Fos	0.0102611		Egfr	Fos	0.0774269
Egfr	Grb2	0.0317637		Egfr	Grb2	0.0198991		Egfr	Grb2	0.0271222		Egfr	Grb2	0.0325812
Egfr	Hras1	0.090616		Egfr	Hras1	0.32011		Egfr	Hras1	0.384415		Egfr	Hras1	0.151807
Egfr	Jun	0.874517		Egfr	Jun	0.888656		Egfr	Jun	0.828079		Egfr	Jun	0.1987
Egfr	Raf1	0.749595		Egfr	Raf1	0.796537		Egfr	Raf1	0.65401		Egfr	Raf1	0.122031
Egfr	Shh	0.152994		Egfr	Shh	0.71056		Egfr	Shh	0.216665		Egfr	Shh	0.162816
Egfr	Sos1	0.422767		Egfr	Sos1	0.217406		Egfr	Sos1	0.389408		Egfr	Sos1	0.14151
Ehmt2	Zfp42	0.109243		Ehmt2	Zfp42	0.261181		Ehmt2	Zfp42	0.115596		Ehmt2	Zfp42	0.114907
Elf5	Cdx2	0.20055		Elf5	Cdx2	0.302176		Elf5	Cdx2	0.232825		Elf5	Cdx2	0.0901859
Eny2	Sox2	0.124092		Eny2	Sox2	0.159874		Eny2	Sox2	0.134412		Eny2	Sox2	0.0527497
Eomes	Cdx2	0.15244		Eomes	Cdx2	0.255892		Eomes	Cdx2	0.0911501		Eomes	Cdx2	0.0990412
Eomes	Elf5	0.390682		Eomes	Elf5	0.453998		Eomes	Elf5	0.606203		Eomes	Elf5	0.133532
Eomes	Sox2	0.0553856		Eomes	Sox2	0.241141		Eomes	Sox2	0.195687		Eomes	Sox2	0.0227648
Ep300	Esrrb	0.287095		Ep300	Esrrb	0.256928		Ep300	Esrrb	0.336883		Ep300	Esrrb	0.154811
Ep300	Klf4	0.148458		Ep300	Klf4	0.246728		Ep300	Klf4	0.113663		Ep300	Klf4	0.0660816
Ep300	Nanog	0.150987		Ep300	Nanog	0.141944		Ep300	Nanog	0.446177		Ep300	Nanog	0.0940736
Ep300	Smad4	0.0642308		Ep300	Smad4	0.0677107		Ep300	Smad4	0.0615721		Ep300	Smad4	0.0851335
Ep300	Smad5	0.0724478		Ep300	Smad5	0.593381		Ep300	Smad5	0.278999		Ep300	Smad5	0.0225457
Ep300	Smad9	0.0370698		Ep300	Smad9	0.0362124		Ep300	Smad9	0.0284647		Ep300	Smad9	0.162836
Ep300	Sox2	0.0235357		Ep300	Sox2	0.128085		Ep300	Sox2	0.0491627		Ep300	Sox2	0.0559828
Ep300	Zfp281	0.0600038		Ep300	Zfp281	0.245456		Ep300	Zfp281	0.217248		Ep300	Zfp281	0.0839174
Ephb1	Akt1	0.0422625		Ephb1	Akt1	0.576828		Ephb1	Akt1	0.280097		Ephb1	Akt1	0.188431
Ephb1	Akt3	0.00875941		Ephb1	Akt3	0.402642		Ephb1	Akt3	0.258302		Ephb1	Akt3	0.090288
Ephb1	Araf	0.0202835		Ephb1	Araf	0.202329		Ephb1	Araf	0.178429		Ephb1	Araf	0.187306
Ephb1	Bmp4	0.0922949		Ephb1	Bmp4	0.311493		Ephb1	Bmp4	0.501658		Ephb1	Bmp4	0.075676
Ephb1	Bmpr1a	0.0258915		Ephb1	Bmpr1a	0.182089		Ephb1	Bmpr1a	0.0979955		Ephb1	Bmpr1a	0.0726203
Ephb1	Braf	0.0621678		Ephb1	Braf	0.0973912		Ephb1	Braf	0.0506165		Ephb1	Braf	0.102637
Ephb1	Dusp6	0.0187486		Ephb1	Dusp6	0.220458		Ephb1	Dusp6	0.320425		Ephb1	Dusp6	0.318855
Ephb1	Egf	0.0434104		Ephb1	Egf	0.231679		Ephb1	Egf	0.287108		Ephb1	Egf	0.0681031
Ephb1	Egfr	0.0290432		Ephb1	Egfr	0.240211		Ephb1	Egfr	0.309742		Ephb1	Egfr	0.556004
Ephb1	Fgf1	0.0219038		Ephb1	Fgf1	0.370391		Ephb1	Fgf1	0.626779		Ephb1	Fgf1	0.064904
Ephb1	Fgf10	0.0298475		Ephb1	Fgf10	0.268002		Ephb1	Fgf10	0.152153		Ephb1	Fgf10	0.0981347
Ephb1	Fgf15	0.0185486		Ephb1	Fgf15	0.136288		Ephb1	Fgf15	0.122832		Ephb1	Fgf15	0.0972041
Ephb1	Fgf16	0.0155305		Ephb1	Fgf16	0.0524892		Ephb1	Fgf16	0.0202009		Ephb1	Fgf16	0.0951739
Ephb1	Fgf17	0.00836883		Ephb1	Fgf17	0.459183		Ephb1	Fgf17	0.556696		Ephb1	Fgf17	0.0960235
Ephb1	Fgf18	0.178905		Ephb1	Fgf18	0.0935776		Ephb1	Fgf18	0.135318		Ephb1	Fgf18	0.334999
Ephb1	Fgf2	0.0350686		Ephb1	Fgf2	0.0129761		Ephb1	Fgf2	0.020778		Ephb1	Fgf2	0.113462
Ephb1	Fgf20	0.00313033		Ephb1	Fgf20	0.00891537		Ephb1	Fgf20	0.0119467		Ephb1	Fgf20	0.0132954
Ephb1	Fgf21	0.409005		Ephb1	Fgf21	0.0120465		Ephb1	Fgf21	0.0465274		Ephb1	Fgf21	0.0570476
Ephb1	Fgf22	0.99999		Ephb1	Fgf22	0.948861		Ephb1	Fgf22	0.921929		Ephb1	Fgf22	0.780745
Ephb1	Fgf23	0.705156		Ephb1	Fgf23	0.273283		Ephb1	Fgf23	0.156047		Ephb1	Fgf23	0.0303778
Ephb1	Fgf3	0.642772		Ephb1	Fgf3	0.149061		Ephb1	Fgf3	0.219665		Ephb1	Fgf3	0.0888583
Ephb1	Fgf4	0.189449		Ephb1	Fgf4	0.241838		Ephb1	Fgf4	0.364037		Ephb1	Fgf4	0.115864
Ephb1	Fgf5	0.948458		Ephb1	Fgf5	0.151295		Ephb1	Fgf5	0.145638		Ephb1	Fgf5	0.195462
Ephb1	Fgf6	0.0229426		Ephb1	Fgf6	0.00810564		Ephb1	Fgf6	0.00605429		Ephb1	Fgf6	0.030749
Ephb1	Fgf7	0.107544		Ephb1	Fgf7	0.0262469		Ephb1	Fgf7	0.128276		Ephb1	Fgf7	0.141847
Ephb1	Fgf8	0.496988		Ephb1	Fgf8	0.00713647		Ephb1	Fgf8	0.0117572		Ephb1	Fgf8	0.152243
Ephb1	Fgfr1	0.0654882		Ephb1	Fgfr1	0.0589185		Ephb1	Fgfr1	0.0450848		Ephb1	Fgfr1	0.10751
Ephb1	Fgfr2	0.128297		Ephb1	Fgfr2	0.0219391		Ephb1	Fgfr2	0.0195758		Ephb1	Fgfr2	0.0565636
Ephb1	Fgfr3	1		Ephb1	Fgfr3	0.623525		Ephb1	Fgfr3	0.969743		Ephb1	Fgfr3	0.491996
Ephb1	Fgfr4	0.113653		Ephb1	Fgfr4	0.18809		Ephb1	Fgfr4	0.283449		Ephb1	Fgfr4	0.118679
Ephb1	Lif	0.995609		Ephb1	Lif	0.522966		Ephb1	Lif	0.51068		Ephb1	Lif	0.0993155
Ephb1	Lifr	0.0475176		Ephb1	Lifr	0.105776		Ephb1	Lifr	0.0735102		Ephb1	Lifr	0.0714838
Ephb1	Map2k1	1		Ephb1	Map2k1	0.271627		Ephb1	Map2k1	0.696266		Ephb1	Map2k1	0.506488
Ephb1	Map2k2	0.172926		Ephb1	Map2k2	0.0248231		Ephb1	Map2k2	0.0693021		Ephb1	Map2k2	0.0670391
Ephb1	Map2k3	0.0987624		Ephb1	Map2k3	0.626642		Ephb1	Map2k3	0.252133		Ephb1	Map2k3	0.0965799
Ephb1	Map2k5	0.0193539		Ephb1	Map2k5	0.00771666		Ephb1	Map2k5	0.0212154		Ephb1	Map2k5	0.10206
Ephb1	Map2k6	0.160225		Ephb1	Map2k6	0.155888		Ephb1	Map2k6	0.0823554		Ephb1	Map2k6	0.0995943
Ephb1	Mapk1	0.0809594		Ephb1	Mapk1	0.0900419		Ephb1	Mapk1	0.0357145		Ephb1	Mapk1	0.103304
Ephb1	Mapk12	0.004848		Ephb1	Mapk12	0.011269		Ephb1	Mapk12	0.00294029		Ephb1	Mapk12	0.0537763
Ephb1	Mapk4	0.0260537		Ephb1	Mapk4	0.0432692		Ephb1	Mapk4	0.0812485		Ephb1	Mapk4	0.11596
Ephb1	Mapk6	0.188661		Ephb1	Mapk6	0.352069		Ephb1	Mapk6	0.0876616		Ephb1	Mapk6	0.0660233
Ephb1	Mapk7	0.0532216		Ephb1	Mapk7	0.0208861		Ephb1	Mapk7	0.0420397		Ephb1	Mapk7	0.308372
Ephb1	Pdk1	0.00544776		Ephb1	Pdk1	0.0149478		Ephb1	Pdk1	0.017153		Ephb1	Pdk1	0.127829
Ephb1	Pik3cd	0.065879		Ephb1	Pik3cd	0.0877944		Ephb1	Pik3cd	0.256372		Ephb1	Pik3cd	0.200723
Ephb1	Pik3r2	0.291099		Ephb1	Pik3r2	0.994363		Ephb1	Pik3r2	0.874568		Ephb1	Pik3r2	0.364182
Ephb1	Ptpn11	0.00724447		Ephb1	Ptpn11	0.0429889		Ephb1	Ptpn11	0.0600147		Ephb1	Ptpn11	0.196484
Ephb1	Raf1	0.0328903		Ephb1	Raf1	0.0242223		Ephb1	Raf1	0.0234332		Ephb1	Raf1	0.10556
Ephb1	Smad4	0.013506		Ephb1	Smad4	0.141497		Ephb1	Smad4	0.0311328		Ephb1	Smad4	0.0494791
Ephb1	Smad5	0.117464		Ephb1	Smad5	0.0328511		Ephb1	Smad5	0.0138889		Ephb1	Smad5	0.016348
Ephb1	Smad9	0.024043		Ephb1	Smad9	0.0542587		Ephb1	Smad9	0.0719955		Ephb1	Smad9	0.186015
Ephb1	Sos1	0.0251224		Ephb1	Sos1	0.103538		Ephb1	Sos1	0.0301888		Ephb1	Sos1	0.22694
Esrrb	Chchd10	0.0160722		Esrrb	Chchd10	0.0297119		Esrrb	Chchd10	0.0280917		Esrrb	Chchd10	0.119696
Esrrb	Evx1	0.0923221		Esrrb	Evx1	0.00865718		Esrrb	Evx1	0.00447916		Esrrb	Evx1	0.0625832
Esrrb	Gpr124	0.0330893		Esrrb	Gpr124	0.0678589		Esrrb	Gpr124	0.0240773		Esrrb	Gpr124	0.305623
Esrrb	Icam1	0.0235889		Esrrb	Icam1	0.0543819		Esrrb	Icam1	0.0473393		Esrrb	Icam1	0.128193
Esrrb	Ldhb	0.0373617		Esrrb	Ldhb	0.0472394		Esrrb	Ldhb	0.0458491		Esrrb	Ldhb	0.101096
Esrrb	Lrrc2	0.0226899		Esrrb	Lrrc2	0.070824		Esrrb	Lrrc2	0.116909		Esrrb	Lrrc2	0.0722171
Esrrb	Mreg	0.928856		Esrrb	Mreg	0.826744		Esrrb	Mreg	0.617158		Esrrb	Mreg	0.122578
Esrrb	Mylpf	0.0605936		Esrrb	Mylpf	0.898583		Esrrb	Mylpf	0.550676		Esrrb	Mylpf	0.170994
Esrrb	Nanog	0.0175206		Esrrb	Nanog	0.496097		Esrrb	Nanog	0.240879		Esrrb	Nanog	0.150119
Esrrb	Sept1	0.100987		Esrrb	Sept1	0.127648		Esrrb	Sept1	0.143781		Esrrb	Sept1	0.212094
Esrrb	Smad4	0.989866		Esrrb	Smad4	0.869253		Esrrb	Smad4	0.678267		Esrrb	Smad4	0.075824
Esrrb	Smad9	0.117422		Esrrb	Smad9	0.338476		Esrrb	Smad9	0.336945		Esrrb	Smad9	0.178636
Esrrb	Sox2	0.0776009		Esrrb	Sox2	0.0266173		Esrrb	Sox2	0.163077		Esrrb	Sox2	0.166308
Esrrb	Tcf3	0.207924		Esrrb	Tcf3	0.245613		Esrrb	Tcf3	0.431809		Esrrb	Tcf3	0.228254
Esrrb	Zfp281	0.492768		Esrrb	Zfp281	0.285995		Esrrb	Zfp281	0.27002		Esrrb	Zfp281	0.0358272
Esx1	Sox2	0.201311		Esx1	Sox2	0.121458		Esx1	Sox2	0.108416		Esx1	Sox2	0.0795404
Ezh1	Eed	0.0220259		Ezh1	Eed	0.273903		Ezh1	Eed	0.154651		Ezh1	Eed	0.354037
Ezh1	H3f3b	0.15999		Ezh1	H3f3b	0.206527		Ezh1	H3f3b	0.496037		Ezh1	H3f3b	0.0940664
Ezh1	Suz12	0.0371947		Ezh1	Suz12	0.0738896		Ezh1	Suz12	0.0424464		Ezh1	Suz12	0.0569557
Ezh1	Zfp42	0.0548928		Ezh1	Zfp42	0.0815635		Ezh1	Zfp42	0.0520964		Ezh1	Zfp42	0.0655543
Ezh2	Eed	0.0299016		Ezh2	Eed	0.594573		Ezh2	Eed	0.377855		Ezh2	Eed	0.0600765
Ezh2	Ezh1	0.00728444		Ezh2	Ezh1	0.0764452		Ezh2	Ezh1	0.0548946		Ezh2	Ezh1	0.103845
Ezh2	Rbbp7	0.28061		Ezh2	Rbbp7	0.654102		Ezh2	Rbbp7	0.321855		Ezh2	Rbbp7	0.161064
Ezh2	Suz12	0.10746		Ezh2	Suz12	0.657534		Ezh2	Suz12	0.251201		Ezh2	Suz12	0.095951
Ezh2	Xist	0.321984		Ezh2	Xist	0.331014		Ezh2	Xist	0.401067		Ezh2	Xist	0.507954
Ezh2	Yy1	0.0480868		Ezh2	Yy1	0.362209		Ezh2	Yy1	0.256643		Ezh2	Yy1	0.155601
Fbxo15	Sox11	0.163812		Fbxo15	Sox11	0.630005		Fbxo15	Sox11	0.225547		Fbxo15	Sox11	0.145969
Fbxo15	Sox15	0.0691385		Fbxo15	Sox15	0.127502		Fbxo15	Sox15	0.0291604		Fbxo15	Sox15	0.251942
Fbxo15	Sox2	0.381183		Fbxo15	Sox2	0.0540302		Fbxo15	Sox2	0.124276		Fbxo15	Sox2	0.15552
Fgf1	Fgfr1	0.168098		Fgf1	Fgfr1	0.0400453		Fgf1	Fgfr1	0.029761		Fgf1	Fgfr1	0.0985533
Fgf1	Fgfr2	0.137462		Fgf1	Fgfr2	0.151251		Fgf1	Fgfr2	0.19727		Fgf1	Fgfr2	0.0589887
Fgf1	Fgfr3	0.15816		Fgf1	Fgfr3	0.0215741		Fgf1	Fgfr3	0.0119016		Fgf1	Fgfr3	0.0793391
Fgf1	Fgfr4	0.121029		Fgf1	Fgfr4	0.00126385		Fgf1	Fgfr4	0.00612507		Fgf1	Fgfr4	0.133603
Fgf1	Fos	0.0926403		Fgf1	Fos	0.0282678		Fgf1	Fos	0.0371092		Fgf1	Fos	0.0724288
Fgf1	Grb2	0.0263363		Fgf1	Grb2	0.0509059		Fgf1	Grb2	0.302318		Fgf1	Grb2	0.237718
Fgf1	Hras1	0.0719615		Fgf1	Hras1	0.348876		Fgf1	Hras1	0.439627		Fgf1	Hras1	0.302471
Fgf1	Jun	0.108238		Fgf1	Jun	0.898385		Fgf1	Jun	0.919718		Fgf1	Jun	0.168939
Fgf1	Raf1	0.198015		Fgf1	Raf1	0.0428672		Fgf1	Raf1	0.112374		Fgf1	Raf1	0.0739247
Fgf1	Sos1	0.111261		Fgf1	Sos1	0.0168489		Fgf1	Sos1	0.0241376		Fgf1	Sos1	0.078927
Fgf10	Araf	0.0616088		Fgf10	Araf	0.0297744		Fgf10	Araf	0.0301022		Fgf10	Araf	0.110721
Fgf10	Braf	0.0337606		Fgf10	Braf	0.0261324		Fgf10	Braf	0.0372847		Fgf10	Braf	0.110758
Fgf10	Fgfr1	0.0279446		Fgf10	Fgfr1	0.0418508		Fgf10	Fgfr1	0.0593026		Fgf10	Fgfr1	0.122444
Fgf10	Fgfr2	0.0318437		Fgf10	Fgfr2	0.0645779		Fgf10	Fgfr2	0.0378286		Fgf10	Fgfr2	0.0874213
Fgf10	Fgfr3	0.0184565		Fgf10	Fgfr3	0.0217845		Fgf10	Fgfr3	0.0311406		Fgf10	Fgfr3	0.0723415
Fgf10	Fgfr4	0.0164582		Fgf10	Fgfr4	0.0409485		Fgf10	Fgfr4	0.0413941		Fgf10	Fgfr4	0.178259
Fgf10	Fos	0.0118417		Fgf10	Fos	0.0399803		Fgf10	Fos	0.0294637		Fgf10	Fos	0.0950798
Fgf10	Grb2	0.0699236		Fgf10	Grb2	0.013171		Fgf10	Grb2	0.0225076		Fgf10	Grb2	0.0647523
Fgf10	Hras1	0.0675765		Fgf10	Hras1	0.0174849		Fgf10	Hras1	0.0323644		Fgf10	Hras1	0.102206
Fgf10	Jun	0.073409		Fgf10	Jun	0.0100818		Fgf10	Jun	0.0296148		Fgf10	Jun	0.14354
Fgf10	Map2k1	0.0393377		Fgf10	Map2k1	0.294904		Fgf10	Map2k1	0.338399		Fgf10	Map2k1	0.170907
Fgf10	Map2k2	0.0840835		Fgf10	Map2k2	0.0592971		Fgf10	Map2k2	0.0701759		Fgf10	Map2k2	0.186225
Fgf10	Map2k3	0.0363018		Fgf10	Map2k3	0.127503		Fgf10	Map2k3	0.151616		Fgf10	Map2k3	0.0777065
Fgf10	Map2k5	0.0707856		Fgf10	Map2k5	0.041444		Fgf10	Map2k5	0.114699		Fgf10	Map2k5	0.119796
Fgf10	Map2k6	0.0822908		Fgf10	Map2k6	0.0557757		Fgf10	Map2k6	0.0916782		Fgf10	Map2k6	0.139835
Fgf10	Mapk1	0.041819		Fgf10	Mapk1	0.196104		Fgf10	Mapk1	0.272106		Fgf10	Mapk1	0.113463
Fgf10	Mapk4	0.230094		Fgf10	Mapk4	0.0397099		Fgf10	Mapk4	0.118006		Fgf10	Mapk4	0.0950408
Fgf10	Mapk6	0.0370766		Fgf10	Mapk6	0.0422158		Fgf10	Mapk6	0.0598103		Fgf10	Mapk6	0.132274
Fgf10	Mapk7	0.0922987		Fgf10	Mapk7	0.0218918		Fgf10	Mapk7	0.0363922		Fgf10	Mapk7	0.121786
Fgf10	Raf1	0.035196		Fgf10	Raf1	0.0161144		Fgf10	Raf1	0.0212377		Fgf10	Raf1	0.181698
Fgf10	Sepp1	0.0373944		Fgf10	Sepp1	0.157804		Fgf10	Sepp1	0.195143		Fgf10	Sepp1	0.399738
Fgf10	Sos1	0.0368484		Fgf10	Sos1	0.00800583		Fgf10	Sos1	0.0240582		Fgf10	Sos1	0.056696
Fgf11	Araf	0.84401		Fgf11	Araf	0.115164		Fgf11	Araf	0.152952		Fgf11	Araf	0.16786
Fgf11	Braf	0.0398237		Fgf11	Braf	0.0878827		Fgf11	Braf	0.122084		Fgf11	Braf	0.148784
Fgf11	Ephb1	0.968893		Fgf11	Ephb1	0.212627		Fgf11	Ephb1	0.514337		Fgf11	Ephb1	0.174965
Fgf11	Fgfr1	0.0921424		Fgf11	Fgfr1	0.0787562		Fgf11	Fgfr1	0.079579		Fgf11	Fgfr1	0.13223
Fgf11	Fgfr2	0.742144		Fgf11	Fgfr2	0.502884		Fgf11	Fgfr2	0.84597		Fgf11	Fgfr2	0.0612668
Fgf11	Fgfr3	0.996684		Fgf11	Fgfr3	0.543087		Fgf11	Fgfr3	0.874677		Fgf11	Fgfr3	0.555739
Fgf11	Fgfr4	0.0546568		Fgf11	Fgfr4	0.083722		Fgf11	Fgfr4	0.116511		Fgf11	Fgfr4	0.115386
Fgf11	Fos	0.871583		Fgf11	Fos	0.424115		Fgf11	Fos	0.484176		Fgf11	Fos	0.110853
Fgf11	Grb2	0.157416		Fgf11	Grb2	0.213653		Fgf11	Grb2	0.159974		Fgf11	Grb2	0.0794965
Fgf11	Hras1	0.207528		Fgf11	Hras1	0.101566		Fgf11	Hras1	0.144691		Fgf11	Hras1	0.0429206
Fgf11	Jun	0.0639192		Fgf11	Jun	0.0826191		Fgf11	Jun	0.0648203		Fgf11	Jun	0.120262
Fgf11	Map2k1	0.252708		Fgf11	Map2k1	0.0520203		Fgf11	Map2k1	0.0567057		Fgf11	Map2k1	0.355189
Fgf11	Map2k2	0.979956		Fgf11	Map2k2	0.530447		Fgf11	Map2k2	0.683558		Fgf11	Map2k2	0.591168
Fgf11	Map2k3	0.855279		Fgf11	Map2k3	0.674095		Fgf11	Map2k3	0.53963		Fgf11	Map2k3	0.222869
Fgf11	Map2k5	0.0570127		Fgf11	Map2k5	0.0293843		Fgf11	Map2k5	0.0344007		Fgf11	Map2k5	0.0961955
Fgf11	Map2k6	0.00614132		Fgf11	Map2k6	0.023538		Fgf11	Map2k6	0.0567853		Fgf11	Map2k6	0.0785435
Fgf11	Mapk1	0.0956843		Fgf11	Mapk1	0.152926		Fgf11	Mapk1	0.123557		Fgf11	Mapk1	0.112579
Fgf11	Mapk4	0.0189712		Fgf11	Mapk4	0.100908		Fgf11	Mapk4	0.0504811		Fgf11	Mapk4	0.124453
Fgf11	Mapk6	0.0120591		Fgf11	Mapk6	0.0725618		Fgf11	Mapk6	0.102926		Fgf11	Mapk6	0.0170134
Fgf11	Mapk7	0.0452104		Fgf11	Mapk7	0.109692		Fgf11	Mapk7	0.0381638		Fgf11	Mapk7	0.08328
Fgf11	Raf1	0.135016		Fgf11	Raf1	0.0225991		Fgf11	Raf1	0.0176337		Fgf11	Raf1	0.0174269
Fgf11	Sepp1	0.121112		Fgf11	Sepp1	0.0297148		Fgf11	Sepp1	0.0252038		Fgf11	Sepp1	0.252141
Fgf11	Sos1	0.158357		Fgf11	Sos1	0.131141		Fgf11	Sos1	0.0876416		Fgf11	Sos1	0.251908
Fgf12	Araf	0.153035		Fgf12	Araf	0.154821		Fgf12	Araf	0.266348		Fgf12	Araf	0.203199
Fgf12	Braf	0.0337317		Fgf12	Braf	0.0380591		Fgf12	Braf	0.0513455		Fgf12	Braf	0.103777
Fgf12	Ephb1	0.0230631		Fgf12	Ephb1	0.0186996		Fgf12	Ephb1	0.0185361		Fgf12	Ephb1	0.0260028
Fgf12	Fgfr1	0.0618924		Fgf12	Fgfr1	0.200453		Fgf12	Fgfr1	0.0410427		Fgf12	Fgfr1	0.091015
Fgf12	Fgfr2	0.186018		Fgf12	Fgfr2	0.154835		Fgf12	Fgfr2	0.097328		Fgf12	Fgfr2	0.148628
Fgf12	Fgfr3	0.00887429		Fgf12	Fgfr3	0.0105968		Fgf12	Fgfr3	0.010015		Fgf12	Fgfr3	0.117269
Fgf12	Fgfr4	0.0290007		Fgf12	Fgfr4	0.187534		Fgf12	Fgfr4	0.115732		Fgf12	Fgfr4	0.0875414
Fgf12	Fos	0.074817		Fgf12	Fos	0.135103		Fgf12	Fos	0.027654		Fgf12	Fos	0.112019
Fgf12	Grb2	0.0402795		Fgf12	Grb2	0.0264355		Fgf12	Grb2	0.0349054		Fgf12	Grb2	0.239744
Fgf12	Hras1	0.132847		Fgf12	Hras1	0.23822		Fgf12	Hras1	0.187367		Fgf12	Hras1	0.350177
Fgf12	Jun	0.206804		Fgf12	Jun	0.12924		Fgf12	Jun	0.0650148		Fgf12	Jun	0.0256909
Fgf12	Map2k1	0.00645589		Fgf12	Map2k1	0.0259154		Fgf12	Map2k1	0.0138354		Fgf12	Map2k1	0.0312246
Fgf12	Map2k2	0.020534		Fgf12	Map2k2	0.0867895		Fgf12	Map2k2	0.149208		Fgf12	Map2k2	0.0913891
Fgf12	Map2k3	0.0134809		Fgf12	Map2k3	0.0708085		Fgf12	Map2k3	0.203695		Fgf12	Map2k3	0.494273
Fgf12	Map2k5	0.0363262		Fgf12	Map2k5	0.0687773		Fgf12	Map2k5	0.106854		Fgf12	Map2k5	0.0719136
Fgf12	Map2k6	0.0134591		Fgf12	Map2k6	0.0377404		Fgf12	Map2k6	0.0366421		Fgf12	Map2k6	0.253334
Fgf12	Mapk1	0.0517626		Fgf12	Mapk1	0.10775		Fgf12	Mapk1	0.171993		Fgf12	Mapk1	0.315613
Fgf12	Mapk4	0.0980891		Fgf12	Mapk4	0.210394		Fgf12	Mapk4	0.0995784		Fgf12	Mapk4	0.11344
Fgf12	Mapk6	0.0558845		Fgf12	Mapk6	0.0649064		Fgf12	Mapk6	0.0688033		Fgf12	Mapk6	0.255737
Fgf12	Mapk7	0.0380486		Fgf12	Mapk7	0.114542		Fgf12	Mapk7	0.117569		Fgf12	Mapk7	0.158648
Fgf12	Raf1	0.177892		Fgf12	Raf1	0.0327002		Fgf12	Raf1	0.130488		Fgf12	Raf1	0.285197
Fgf12	Sepp1	0.0175424		Fgf12	Sepp1	0.0349081		Fgf12	Sepp1	0.02569		Fgf12	Sepp1	0.074821
Fgf12	Sos1	0.00980263		Fgf12	Sos1	0.0778228		Fgf12	Sos1	0.0459309		Fgf12	Sos1	0.0941038
Fgf13	Araf	0.0236384		Fgf13	Araf	0.0786994		Fgf13	Araf	0.0865578		Fgf13	Araf	0.130633
Fgf13	Braf	0.00397577		Fgf13	Braf	0.0234674		Fgf13	Braf	0.0194926		Fgf13	Braf	0.0729442
Fgf13	Ephb1	0.0061991		Fgf13	Ephb1	0.0605713		Fgf13	Ephb1	0.0653085		Fgf13	Ephb1	0.253774
Fgf13	Fgfr1	0.0088116		Fgf13	Fgfr1	0.132682		Fgf13	Fgfr1	0.082399		Fgf13	Fgfr1	0.0976541
Fgf13	Fgfr2	0.0106938		Fgf13	Fgfr2	0.0600216		Fgf13	Fgfr2	0.0395656		Fgf13	Fgfr2	0.138398
Fgf13	Fgfr3	0.0336461		Fgf13	Fgfr3	0.0550084		Fgf13	Fgfr3	0.0570989		Fgf13	Fgfr3	0.148189
Fgf13	Fgfr4	0.0384085		Fgf13	Fgfr4	0.0479569		Fgf13	Fgfr4	0.0579384		Fgf13	Fgfr4	0.195581
Fgf13	Fos	0.0110796		Fgf13	Fos	0.0479884		Fgf13	Fos	0.0443628		Fgf13	Fos	0.0745837
Fgf13	Grb2	0.00576948		Fgf13	Grb2	0.23825		Fgf13	Grb2	0.105109		Fgf13	Grb2	0.0693751
Fgf13	Hras1	0.0611379		Fgf13	Hras1	0.0553934		Fgf13	Hras1	0.0461262		Fgf13	Hras1	0.227632
Fgf13	Jun	0.0506045		Fgf13	Jun	0.0562602		Fgf13	Jun	0.0419705		Fgf13	Jun	0.108024
Fgf13	Map2k1	0.0719844		Fgf13	Map2k1	0.0284257		Fgf13	Map2k1	0.0251625		Fgf13	Map2k1	0.142462
Fgf13	Map2k2	0.00523145		Fgf13	Map2k2	0.0322369		Fgf13	Map2k2	0.0268697		Fgf13	Map2k2	0.0960159
Fgf13	Map2k3	0.195928		Fgf13	Map2k3	0.126456		Fgf13	Map2k3	0.122029		Fgf13	Map2k3	0.185561
Fgf13	Map2k5	0.0523021		Fgf13	Map2k5	0.0513344		Fgf13	Map2k5	0.0554497		Fgf13	Map2k5	0.16407
Fgf13	Map2k6	0.0596102		Fgf13	Map2k6	0.110382		Fgf13	Map2k6	0.0927492		Fgf13	Map2k6	0.0291806
Fgf13	Mapk1	0.0156793		Fgf13	Mapk1	0.495973		Fgf13	Mapk1	0.512685		Fgf13	Mapk1	0.192281
Fgf13	Mapk4	0.277675		Fgf13	Mapk4	0.206852		Fgf13	Mapk4	0.035005		Fgf13	Mapk4	0.25235
Fgf13	Mapk6	0.0288302		Fgf13	Mapk6	0.0177171		Fgf13	Mapk6	0.00999251		Fgf13	Mapk6	0.0854242
Fgf13	Mapk7	0.0270271		Fgf13	Mapk7	0.0220048		Fgf13	Mapk7	0.0100471		Fgf13	Mapk7	0.14989
Fgf13	Raf1	0.0978777		Fgf13	Raf1	0.171626		Fgf13	Raf1	0.0985061		Fgf13	Raf1	0.0950239
Fgf13	Sepp1	0.0683133		Fgf13	Sepp1	0.136927		Fgf13	Sepp1	0.145681		Fgf13	Sepp1	0.0343176
Fgf13	Sos1	0.0459034		Fgf13	Sos1	0.0279528		Fgf13	Sos1	0.0213028		Fgf13	Sos1	0.0600985
Fgf14	Araf	0.143415		Fgf14	Araf	0.101355		Fgf14	Araf	0.0766852		Fgf14	Araf	0.134164
Fgf14	Braf	0.0206203		Fgf14	Braf	0.24186		Fgf14	Braf	0.130693		Fgf14	Braf	0.0572305
Fgf14	Ephb1	0.0726655		Fgf14	Ephb1	0.295488		Fgf14	Ephb1	0.313332		Fgf14	Ephb1	0.0536275
Fgf14	Fgfr1	0.040276		Fgf14	Fgfr1	0.0572271		Fgf14	Fgfr1	0.0394921		Fgf14	Fgfr1	0.386769
Fgf14	Fgfr2	0.098396		Fgf14	Fgfr2	0.136893		Fgf14	Fgfr2	0.077192		Fgf14	Fgfr2	0.148052
Fgf14	Fgfr3	0.367524		Fgf14	Fgfr3	0.13456		Fgf14	Fgfr3	0.0519138		Fgf14	Fgfr3	0.0379962
Fgf14	Fgfr4	0.0108307		Fgf14	Fgfr4	0.292406		Fgf14	Fgfr4	0.329531		Fgf14	Fgfr4	0.0515477
Fgf14	Fos	0.14672		Fgf14	Fos	0.120308		Fgf14	Fos	0.0780119		Fgf14	Fos	0.261794
Fgf14	Grb2	0.036813		Fgf14	Grb2	0.0296565		Fgf14	Grb2	0.0422474		Fgf14	Grb2	0.0681492
Fgf14	Hras1	0.0747737		Fgf14	Hras1	0.0398101		Fgf14	Hras1	0.0410035		Fgf14	Hras1	0.155795
Fgf14	Jun	0.0196605		Fgf14	Jun	0.105593		Fgf14	Jun	0.21671		Fgf14	Jun	0.303245
Fgf14	Map2k1	0.0236146		Fgf14	Map2k1	0.126235		Fgf14	Map2k1	0.16016		Fgf14	Map2k1	0.157546
Fgf14	Map2k2	0.0179074		Fgf14	Map2k2	0.138326		Fgf14	Map2k2	0.0555567		Fgf14	Map2k2	0.157564
Fgf14	Map2k3	0.0399844		Fgf14	Map2k3	0.0885299		Fgf14	Map2k3	0.0663491		Fgf14	Map2k3	0.211316
Fgf14	Map2k5	0.0804127		Fgf14	Map2k5	0.0313002		Fgf14	Map2k5	0.0413984		Fgf14	Map2k5	0.0779462
Fgf14	Map2k6	0.0656093		Fgf14	Map2k6	0.0292792		Fgf14	Map2k6	0.0382456		Fgf14	Map2k6	0.089426
Fgf14	Mapk1	0.109357		Fgf14	Mapk1	0.644027		Fgf14	Mapk1	0.135102		Fgf14	Mapk1	0.0633141
Fgf14	Mapk4	0.0405566		Fgf14	Mapk4	0.17266		Fgf14	Mapk4	0.104562		Fgf14	Mapk4	0.131777
Fgf14	Mapk6	0.0385126		Fgf14	Mapk6	0.0265481		Fgf14	Mapk6	0.0234842		Fgf14	Mapk6	0.184471
Fgf14	Mapk7	0.054549		Fgf14	Mapk7	0.331788		Fgf14	Mapk7	0.338516		Fgf14	Mapk7	0.177259
Fgf14	Raf1	0.13465		Fgf14	Raf1	0.068231		Fgf14	Raf1	0.0989677		Fgf14	Raf1	0.190006
Fgf14	Sepp1	0.124933		Fgf14	Sepp1	0.212793		Fgf14	Sepp1	0.338092		Fgf14	Sepp1	0.285888
Fgf14	Sos1	0.122376		Fgf14	Sos1	0.344226		Fgf14	Sos1	0.240461		Fgf14	Sos1	0.243067
Fgf15	Araf	0.43858		Fgf15	Araf	0.331253		Fgf15	Araf	0.171056		Fgf15	Araf	0.0854707
Fgf15	Braf	0.0901662		Fgf15	Braf	0.156802		Fgf15	Braf	0.416022		Fgf15	Braf	0.022477
Fgf15	Fgfr1	0.273947		Fgf15	Fgfr1	0.10801		Fgf15	Fgfr1	0.163467		Fgf15	Fgfr1	0.0822971
Fgf15	Fgfr2	0.701226		Fgf15	Fgfr2	0.269065		Fgf15	Fgfr2	0.105292		Fgf15	Fgfr2	0.574844
Fgf15	Fgfr3	0.0623707		Fgf15	Fgfr3	0.0902114		Fgf15	Fgfr3	0.0668786		Fgf15	Fgfr3	0.119461
Fgf15	Fgfr4	0.0131994		Fgf15	Fgfr4	0.190856		Fgf15	Fgfr4	0.279861		Fgf15	Fgfr4	0.107029
Fgf15	Fos	0.239013		Fgf15	Fos	0.0332351		Fgf15	Fos	0.062342		Fgf15	Fos	0.166001
Fgf15	Grb2	0.0204833		Fgf15	Grb2	0.061912		Fgf15	Grb2	0.176461		Fgf15	Grb2	0.114591
Fgf15	Hras1	0.105714		Fgf15	Hras1	0.0437709		Fgf15	Hras1	0.0775668		Fgf15	Hras1	0.0820793
Fgf15	Jun	0.452602		Fgf15	Jun	0.25613		Fgf15	Jun	0.220453		Fgf15	Jun	0.0733203
Fgf15	Map2k1	0.836231		Fgf15	Map2k1	0.17729		Fgf15	Map2k1	0.150516		Fgf15	Map2k1	0.186514
Fgf15	Map2k2	0.0226294		Fgf15	Map2k2	0.0283788		Fgf15	Map2k2	0.06244		Fgf15	Map2k2	0.153481
Fgf15	Map2k3	0.161074		Fgf15	Map2k3	0.215534		Fgf15	Map2k3	0.196279		Fgf15	Map2k3	0.0784835
Fgf15	Map2k5	0.305014		Fgf15	Map2k5	0.292345		Fgf15	Map2k5	0.139145		Fgf15	Map2k5	0.0320217
Fgf15	Map2k6	0.0387454		Fgf15	Map2k6	0.108046		Fgf15	Map2k6	0.175881		Fgf15	Map2k6	0.059421
Fgf15	Mapk1	0.589547		Fgf15	Mapk1	0.867492		Fgf15	Mapk1	0.974831		Fgf15	Mapk1	0.0826152
Fgf15	Mapk4	0.379472		Fgf15	Mapk4	0.066639		Fgf15	Mapk4	0.0737202		Fgf15	Mapk4	0.102413
Fgf15	Mapk6	0.130212		Fgf15	Mapk6	0.217374		Fgf15	Mapk6	0.16357		Fgf15	Mapk6	0.042755
Fgf15	Mapk7	0.737211		Fgf15	Mapk7	0.110474		Fgf15	Mapk7	0.419108		Fgf15	Mapk7	0.235925
Fgf15	Raf1	0.376612		Fgf15	Raf1	0.175911		Fgf15	Raf1	0.247575		Fgf15	Raf1	0.100981
Fgf15	Sepp1	0.185258		Fgf15	Sepp1	0.0999294		Fgf15	Sepp1	0.294548		Fgf15	Sepp1	0.109939
Fgf15	Sos1	0.531661		Fgf15	Sos1	0.318762		Fgf15	Sos1	0.360836		Fgf15	Sos1	0.121046
Fgf16	Araf	0.141747		Fgf16	Araf	0.519366		Fgf16	Araf	0.190536		Fgf16	Araf	0.048949
Fgf16	Braf	0.247636		Fgf16	Braf	0.448528		Fgf16	Braf	0.560653		Fgf16	Braf	0.382323
Fgf16	Fgfr1	0.0484678		Fgf16	Fgfr1	0.0546703		Fgf16	Fgfr1	0.0413593		Fgf16	Fgfr1	0.164428
Fgf16	Fgfr2	0.0167652		Fgf16	Fgfr2	0.311323		Fgf16	Fgfr2	0.26431		Fgf16	Fgfr2	0.130042
Fgf16	Fgfr3	0.00736248		Fgf16	Fgfr3	0.0603285		Fgf16	Fgfr3	0.0359749		Fgf16	Fgfr3	0.10681
Fgf16	Fgfr4	0.0219418		Fgf16	Fgfr4	0.0677033		Fgf16	Fgfr4	0.0948495		Fgf16	Fgfr4	0.224207
Fgf16	Fos	0.0216522		Fgf16	Fos	0.0490624		Fgf16	Fos	0.0273442		Fgf16	Fos	0.345515
Fgf16	Grb2	0.107063		Fgf16	Grb2	0.0457496		Fgf16	Grb2	0.0572926		Fgf16	Grb2	0.340501
Fgf16	Hras1	0.00753605		Fgf16	Hras1	0.121405		Fgf16	Hras1	0.0573028		Fgf16	Hras1	0.272281
Fgf16	Jun	0.015198		Fgf16	Jun	0.0775493		Fgf16	Jun	0.287727		Fgf16	Jun	0.393459
Fgf16	Mapk4	0.0977996		Fgf16	Mapk4	0.347551		Fgf16	Mapk4	0.112172		Fgf16	Mapk4	0.0507046
Fgf16	Raf1	0.0191938		Fgf16	Raf1	0.028304		Fgf16	Raf1	0.0546004		Fgf16	Raf1	0.0896683
Fgf16	Sepp1	0.0167608		Fgf16	Sepp1	0.115516		Fgf16	Sepp1	0.466774		Fgf16	Sepp1	0.138953
Fgf16	Sos1	0.0538776		Fgf16	Sos1	0.0570442		Fgf16	Sos1	0.0700252		Fgf16	Sos1	0.241239
Fgf17	Araf	0.0110527		Fgf17	Araf	0.337648		Fgf17	Araf	0.0645215		Fgf17	Araf	0.0665801
Fgf17	Braf	0.0177158		Fgf17	Braf	0.204398		Fgf17	Braf	0.129848		Fgf17	Braf	0.0815526
Fgf17	Fgfr1	0.0182761		Fgf17	Fgfr1	0.0527651		Fgf17	Fgfr1	0.0462928		Fgf17	Fgfr1	0.103552
Fgf17	Fgfr2	0.0533476		Fgf17	Fgfr2	0.20636		Fgf17	Fgfr2	0.0976455		Fgf17	Fgfr2	0.119691
Fgf17	Fgfr3	0.0758922		Fgf17	Fgfr3	0.135957		Fgf17	Fgfr3	0.0649986		Fgf17	Fgfr3	0.0645979
Fgf17	Fgfr4	0.0424399		Fgf17	Fgfr4	0.463113		Fgf17	Fgfr4	0.37841		Fgf17	Fgfr4	0.115463
Fgf17	Fos	0.0200409		Fgf17	Fos	0.291615		Fgf17	Fos	0.183936		Fgf17	Fos	0.168056
Fgf17	Grb2	0.0317875		Fgf17	Grb2	0.3187		Fgf17	Grb2	0.301509		Fgf17	Grb2	0.0851766
Fgf17	Hras1	0.0333483		Fgf17	Hras1	0.184011		Fgf17	Hras1	0.115303		Fgf17	Hras1	0.342825
Fgf17	Jun	0.00828313		Fgf17	Jun	0.0101258		Fgf17	Jun	0.020345		Fgf17	Jun	0.295409
Fgf17	Map2k1	0.0149492		Fgf17	Map2k1	0.123851		Fgf17	Map2k1	0.134657		Fgf17	Map2k1	0.108768
Fgf17	Map2k2	0.0150583		Fgf17	Map2k2	0.0484261		Fgf17	Map2k2	0.0344411		Fgf17	Map2k2	0.0534712
Fgf17	Map2k3	0.173181		Fgf17	Map2k3	0.161225		Fgf17	Map2k3	0.178189		Fgf17	Map2k3	0.0652345
Fgf17	Map2k5	0.117179		Fgf17	Map2k5	0.0613202		Fgf17	Map2k5	0.13068		Fgf17	Map2k5	0.112467
Fgf17	Map2k6	0.0211326		Fgf17	Map2k6	0.0697638		Fgf17	Map2k6	0.0723721		Fgf17	Map2k6	0.145198
Fgf17	Mapk1	0.0523996		Fgf17	Mapk1	0.0428284		Fgf17	Mapk1	0.100051		Fgf17	Mapk1	0.0559668
Fgf17	Mapk4	0.0413371		Fgf17	Mapk4	0.0903582		Fgf17	Mapk4	0.0978612		Fgf17	Mapk4	0.0280617
Fgf17	Mapk6	0.0781463		Fgf17	Mapk6	0.1988		Fgf17	Mapk6	0.0714627		Fgf17	Mapk6	0.203359
Fgf17	Mapk7	0.0921525		Fgf17	Mapk7	0.30433		Fgf17	Mapk7	0.0805854		Fgf17	Mapk7	0.0628339
Fgf17	Raf1	0.0762764		Fgf17	Raf1	0.0607645		Fgf17	Raf1	0.369545		Fgf17	Raf1	0.133209
Fgf17	Sepp1	0.255319		Fgf17	Sepp1	0.0614794		Fgf17	Sepp1	0.104057		Fgf17	Sepp1	0.0537565
Fgf17	Sos1	0.195667		Fgf17	Sos1	0.0331622		Fgf17	Sos1	0.126478		Fgf17	Sos1	0.10884
Fgf18	Araf	0.0700316		Fgf18	Araf	0.0501654		Fgf18	Araf	0.117861		Fgf18	Araf	0.132618
Fgf18	Braf	0.0734983		Fgf18	Braf	0.334052		Fgf18	Braf	0.107152		Fgf18	Braf	0.151673
Fgf18	Fgfr1	0.443843		Fgf18	Fgfr1	0.047189		Fgf18	Fgfr1	0.324115		Fgf18	Fgfr1	0.118479
Fgf18	Fgfr2	0.040067		Fgf18	Fgfr2	0.0839001		Fgf18	Fgfr2	0.153704		Fgf18	Fgfr2	0.218623
Fgf18	Fgfr3	0.0440704		Fgf18	Fgfr3	0.0330016		Fgf18	Fgfr3	0.0906837		Fgf18	Fgfr3	0.0907415
Fgf18	Fgfr4	0.417263		Fgf18	Fgfr4	0.307293		Fgf18	Fgfr4	0.179359		Fgf18	Fgfr4	0.110816
Fgf18	Fos	0.4396		Fgf18	Fos	0.185885		Fgf18	Fos	0.159301		Fgf18	Fos	0.041818
Fgf18	Grb2	0.0943499		Fgf18	Grb2	0.0120911		Fgf18	Grb2	0.0100727		Fgf18	Grb2	0.0912485
Fgf18	Hras1	0.0490169		Fgf18	Hras1	0.159283		Fgf18	Hras1	0.0903846		Fgf18	Hras1	0.0632799
Fgf18	Jun	0.242555		Fgf18	Jun	0.278927		Fgf18	Jun	0.0993024		Fgf18	Jun	0.0670613
Fgf18	Map2k1	0.0724209		Fgf18	Map2k1	0.304242		Fgf18	Map2k1	0.370009		Fgf18	Map2k1	0.00907329
Fgf18	Map2k2	0.139368		Fgf18	Map2k2	0.0869544		Fgf18	Map2k2	0.128025		Fgf18	Map2k2	0.0612558
Fgf18	Map2k3	0.0123547		Fgf18	Map2k3	0.0261718		Fgf18	Map2k3	0.00397657		Fgf18	Map2k3	0.0606488
Fgf18	Map2k5	0.0159963		Fgf18	Map2k5	0.0107761		Fgf18	Map2k5	0.0460326		Fgf18	Map2k5	0.370494
Fgf18	Map2k6	0.0835936		Fgf18	Map2k6	0.0299703		Fgf18	Map2k6	0.0311406		Fgf18	Map2k6	0.110542
Fgf18	Mapk1	0.435403		Fgf18	Mapk1	0.90939		Fgf18	Mapk1	0.760511		Fgf18	Mapk1	0.0560718
Fgf18	Mapk4	0.822004		Fgf18	Mapk4	0.897186		Fgf18	Mapk4	0.577815		Fgf18	Mapk4	0.472195
Fgf18	Mapk6	0.0725491		Fgf18	Mapk6	0.181233		Fgf18	Mapk6	0.116096		Fgf18	Mapk6	0.0885142
Fgf18	Mapk7	0.00714861		Fgf18	Mapk7	0.211986		Fgf18	Mapk7	0.177497		Fgf18	Mapk7	0.175844
Fgf18	Raf1	0.625059		Fgf18	Raf1	0.310562		Fgf18	Raf1	0.506703		Fgf18	Raf1	0.210367
Fgf18	Sepp1	0.806792		Fgf18	Sepp1	0.415979		Fgf18	Sepp1	0.508772		Fgf18	Sepp1	0.0730321
Fgf18	Sos1	0.0841138		Fgf18	Sos1	0.0520655		Fgf18	Sos1	0.0630998		Fgf18	Sos1	0.0794131
Fgf2	Fgfr1	0.772363		Fgf2	Fgfr1	0.72457		Fgf2	Fgfr1	0.658312		Fgf2	Fgfr1	0.328859
Fgf2	Fgfr2	0.165706		Fgf2	Fgfr2	0.216607		Fgf2	Fgfr2	0.148327		Fgf2	Fgfr2	0.0467731
Fgf2	Fgfr3	0.0877426		Fgf2	Fgfr3	0.0430321		Fgf2	Fgfr3	0.0984559		Fgf2	Fgfr3	0.0823519
Fgf2	Fgfr4	0.729487		Fgf2	Fgfr4	0.0567193		Fgf2	Fgfr4	0.0357108		Fgf2	Fgfr4	0.491952
Fgf2	Fos	0.44319		Fgf2	Fos	0.194156		Fgf2	Fos	0.12887		Fgf2	Fos	0.308343
Fgf2	Grb2	0.605799		Fgf2	Grb2	0.388346		Fgf2	Grb2	0.384993		Fgf2	Grb2	0.114955
Fgf2	Hras1	0.147382		Fgf2	Hras1	0.0518745		Fgf2	Hras1	0.0136029		Fgf2	Hras1	0.0179212
Fgf2	Jun	0.290833		Fgf2	Jun	0.378137		Fgf2	Jun	0.784216		Fgf2	Jun	0.0851846
Fgf2	Raf1	0.553632		Fgf2	Raf1	0.171982		Fgf2	Raf1	0.127465		Fgf2	Raf1	0.0355669
Fgf2	Sos1	0.0837369		Fgf2	Sos1	0.368752		Fgf2	Sos1	0.128658		Fgf2	Sos1	0.137017
Fgf2	Sox2	0.999955		Fgf2	Sox2	0.953493		Fgf2	Sox2	0.955967		Fgf2	Sox2	0.857066
Fgf20	Araf	0.0767646		Fgf20	Araf	0.298978		Fgf20	Araf	0.131633		Fgf20	Araf	0.0402494
Fgf20	Braf	0.440966		Fgf20	Braf	0.213211		Fgf20	Braf	0.126106		Fgf20	Braf	0.140998
Fgf20	Fgfr1	0.383206		Fgf20	Fgfr1	0.252636		Fgf20	Fgfr1	0.121805		Fgf20	Fgfr1	0.130916
Fgf20	Fgfr2	0.948501		Fgf20	Fgfr2	0.8655		Fgf20	Fgfr2	0.918499		Fgf20	Fgfr2	0.242201
Fgf20	Fgfr3	0.8466		Fgf20	Fgfr3	0.395279		Fgf20	Fgfr3	0.384308		Fgf20	Fgfr3	0.385417
Fgf20	Fgfr4	0.999392		Fgf20	Fgfr4	0.920434		Fgf20	Fgfr4	0.981339		Fgf20	Fgfr4	0.984913
Fgf20	Fos	0.351285		Fgf20	Fos	0.529884		Fgf20	Fos	0.525576		Fgf20	Fos	0.102347
Fgf20	Grb2	0.508885		Fgf20	Grb2	0.170229		Fgf20	Grb2	0.472931		Fgf20	Grb2	0.184347
Fgf20	Hras1	0.656414		Fgf20	Hras1	0.381424		Fgf20	Hras1	0.346151		Fgf20	Hras1	0.0835235
Fgf20	Jun	0.113751		Fgf20	Jun	0.445503		Fgf20	Jun	0.322512		Fgf20	Jun	0.33131
Fgf20	Mapk4	0.0608416		Fgf20	Mapk4	0.171289		Fgf20	Mapk4	0.180884		Fgf20	Mapk4	0.0736674
Fgf20	Raf1	0.102566		Fgf20	Raf1	0.258688		Fgf20	Raf1	0.215499		Fgf20	Raf1	0.493783
Fgf20	Sepp1	0.437339		Fgf20	Sepp1	0.612002		Fgf20	Sepp1	0.124171		Fgf20	Sepp1	0.151465
Fgf20	Sos1	0.0907006		Fgf20	Sos1	0.243537		Fgf20	Sos1	0.145172		Fgf20	Sos1	0.127768
Fgf21	Araf	0.0821823		Fgf21	Araf	0.0360433		Fgf21	Araf	0.0903792		Fgf21	Araf	0.221116
Fgf21	Braf	0.981312		Fgf21	Braf	0.716898		Fgf21	Braf	0.553345		Fgf21	Braf	0.277254
Fgf21	Fgfr1	0.275646		Fgf21	Fgfr1	0.328483		Fgf21	Fgfr1	0.220587		Fgf21	Fgfr1	0.125107
Fgf21	Fgfr2	0.87004		Fgf21	Fgfr2	0.0824119		Fgf21	Fgfr2	0.0884713		Fgf21	Fgfr2	0.0698779
Fgf21	Fgfr3	0.229894		Fgf21	Fgfr3	0.298164		Fgf21	Fgfr3	0.586841		Fgf21	Fgfr3	0.0951108
Fgf21	Fgfr4	0.459959		Fgf21	Fgfr4	0.103472		Fgf21	Fgfr4	0.246209		Fgf21	Fgfr4	0.127665
Fgf21	Fos	0.0394409		Fgf21	Fos	0.134991		Fgf21	Fos	0.256306		Fgf21	Fos	0.237307
Fgf21	Grb2	0.603695		Fgf21	Grb2	0.722198		Fgf21	Grb2	0.310547		Fgf21	Grb2	0.0521184
Fgf21	Hras1	0.585559		Fgf21	Hras1	0.170694		Fgf21	Hras1	0.0532086		Fgf21	Hras1	0.23069
Fgf21	Jun	0.672236		Fgf21	Jun	0.0761138		Fgf21	Jun	0.07795		Fgf21	Jun	0.0791975
Fgf21	Mapk4	0.852296		Fgf21	Mapk4	0.0811576		Fgf21	Mapk4	0.142955		Fgf21	Mapk4	0.162573
Fgf21	Raf1	0.460079		Fgf21	Raf1	0.692385		Fgf21	Raf1	0.276342		Fgf21	Raf1	0.0527715
Fgf21	Sepp1	0.308929		Fgf21	Sepp1	0.117584		Fgf21	Sepp1	0.116027		Fgf21	Sepp1	0.437099
Fgf21	Sos1	0.240093		Fgf21	Sos1	0.159186		Fgf21	Sos1	0.110682		Fgf21	Sos1	0.097432
Fgf22	Araf	0.791708		Fgf22	Araf	0.088034		Fgf22	Araf	0.102738		Fgf22	Araf	0.394913
Fgf22	Braf	0.304714		Fgf22	Braf	0.579208		Fgf22	Braf	0.542151		Fgf22	Braf	0.286048
Fgf22	Fgfr1	0.0478347		Fgf22	Fgfr1	0.0248937		Fgf22	Fgfr1	0.0355366		Fgf22	Fgfr1	0.0807669
Fgf22	Fgfr2	0.0251958		Fgf22	Fgfr2	0.403843		Fgf22	Fgfr2	0.115037		Fgf22	Fgfr2	0.120032
Fgf22	Fgfr3	0.0818194		Fgf22	Fgfr3	0.253123		Fgf22	Fgfr3	0.120076		Fgf22	Fgfr3	0.167827
Fgf22	Fgfr4	0.0384946		Fgf22	Fgfr4	0.425166		Fgf22	Fgfr4	0.248417		Fgf22	Fgfr4	0.156245
Fgf22	Fos	0.0693534		Fgf22	Fos	0.563129		Fgf22	Fos	0.533378		Fgf22	Fos	0.308306
Fgf22	Grb2	0.186378		Fgf22	Grb2	0.127802		Fgf22	Grb2	0.13772		Fgf22	Grb2	0.198534
Fgf22	Hras1	0.254967		Fgf22	Hras1	0.0702777		Fgf22	Hras1	0.0777642		Fgf22	Hras1	0.11346
Fgf22	Jun	0.161708		Fgf22	Jun	0.0400148		Fgf22	Jun	0.126606		Fgf22	Jun	0.162334
Fgf22	Mapk4	0.122709		Fgf22	Mapk4	0.538816		Fgf22	Mapk4	0.121208		Fgf22	Mapk4	0.0519993
Fgf22	Raf1	0.0944957		Fgf22	Raf1	0.209711		Fgf22	Raf1	0.223488		Fgf22	Raf1	0.0280177
Fgf22	Sepp1	0.145881		Fgf22	Sepp1	0.0388937		Fgf22	Sepp1	0.213304		Fgf22	Sepp1	0.237404
Fgf22	Sos1	0.14868		Fgf22	Sos1	0.122282		Fgf22	Sos1	0.446214		Fgf22	Sos1	0.0784886
Fgf23	Araf	0.267972		Fgf23	Araf	0.702258		Fgf23	Araf	0.193015		Fgf23	Araf	0.0501139
Fgf23	Braf	0.020729		Fgf23	Braf	0.0832168		Fgf23	Braf	0.0563125		Fgf23	Braf	0.0759869
Fgf23	Fgfr1	0.111615		Fgf23	Fgfr1	0.0287603		Fgf23	Fgfr1	0.071801		Fgf23	Fgfr1	0.177497
Fgf23	Fgfr2	0.0359935		Fgf23	Fgfr2	0.0718385		Fgf23	Fgfr2	0.0547578		Fgf23	Fgfr2	0.0924209
Fgf23	Fgfr3	0.410549		Fgf23	Fgfr3	0.642478		Fgf23	Fgfr3	0.156143		Fgf23	Fgfr3	0.0439704
Fgf23	Fgfr4	0.155855		Fgf23	Fgfr4	0.0532542		Fgf23	Fgfr4	0.0151767		Fgf23	Fgfr4	0.114759
Fgf23	Fos	0.0910851		Fgf23	Fos	0.100765		Fgf23	Fos	0.0857117		Fgf23	Fos	0.0329937
Fgf23	Grb2	0.0723583		Fgf23	Grb2	0.057239		Fgf23	Grb2	0.0670888		Fgf23	Grb2	0.0682905
Fgf23	Hras1	0.184662		Fgf23	Hras1	0.0578709		Fgf23	Hras1	0.107816		Fgf23	Hras1	0.155022
Fgf23	Jun	0.0500671		Fgf23	Jun	0.0599004		Fgf23	Jun	0.0605392		Fgf23	Jun	0.0395001
Fgf23	Mapk4	0.0155442		Fgf23	Mapk4	0.0442392		Fgf23	Mapk4	0.0443141		Fgf23	Mapk4	0.178322
Fgf23	Raf1	0.00568655		Fgf23	Raf1	0.0343492		Fgf23	Raf1	0.0150682		Fgf23	Raf1	0.0193071
Fgf23	Sepp1	0.0166314		Fgf23	Sepp1	0.0893023		Fgf23	Sepp1	0.058192		Fgf23	Sepp1	0.164585
Fgf23	Sos1	0.0516844		Fgf23	Sos1	0.261024		Fgf23	Sos1	0.102141		Fgf23	Sos1	0.275754
Fgf3	Fgfr1	0.140459		Fgf3	Fgfr1	0.0231387		Fgf3	Fgfr1	0.0131559		Fgf3	Fgfr1	0.0576197
Fgf3	Fgfr2	0.0900105		Fgf3	Fgfr2	0.106337		Fgf3	Fgfr2	0.10011		Fgf3	Fgfr2	0.0676479
Fgf3	Fgfr3	0.00886976		Fgf3	Fgfr3	0.09251		Fgf3	Fgfr3	0.171101		Fgf3	Fgfr3	0.0637507
Fgf3	Fgfr4	0.0305544		Fgf3	Fgfr4	0.0593662		Fgf3	Fgfr4	0.024395		Fgf3	Fgfr4	0.0574476
Fgf3	Fos	0.0997282		Fgf3	Fos	0.0143189		Fgf3	Fos	0.0200527		Fgf3	Fos	0.0533339
Fgf3	Grb2	0.0255035		Fgf3	Grb2	0.0396459		Fgf3	Grb2	0.107233		Fgf3	Grb2	0.131228
Fgf3	Hras1	0.0947624		Fgf3	Hras1	0.0828701		Fgf3	Hras1	0.096795		Fgf3	Hras1	0.0347788
Fgf3	Jun	0.00941241		Fgf3	Jun	0.0349086		Fgf3	Jun	0.0136216		Fgf3	Jun	0.0149751
Fgf3	Raf1	0.0484357		Fgf3	Raf1	0.126807		Fgf3	Raf1	0.103753		Fgf3	Raf1	0.0459751
Fgf3	Sos1	0.0515653		Fgf3	Sos1	0.119124		Fgf3	Sos1	0.105418		Fgf3	Sos1	0.0439037
Fgf4	Fgfr1	0.0720706		Fgf4	Fgfr1	0.0340481		Fgf4	Fgfr1	0.0144572		Fgf4	Fgfr1	0.0721488
Fgf4	Fgfr2	0.208628		Fgf4	Fgfr2	0.0579093		Fgf4	Fgfr2	0.0152938		Fgf4	Fgfr2	0.05929
Fgf4	Fgfr3	0.0596119		Fgf4	Fgfr3	0.0228866		Fgf4	Fgfr3	0.0433948		Fgf4	Fgfr3	0.275696
Fgf4	Fgfr4	0.0715147		Fgf4	Fgfr4	0.0708176		Fgf4	Fgfr4	0.0588642		Fgf4	Fgfr4	0.115184
Fgf4	Fos	0.0456764		Fgf4	Fos	0.0146035		Fgf4	Fos	0.00421426		Fgf4	Fos	0.144556
Fgf4	Grb2	0.0439256		Fgf4	Grb2	0.193302		Fgf4	Grb2	0.193865		Fgf4	Grb2	0.15125
Fgf4	Hras1	0.181646		Fgf4	Hras1	0.062798		Fgf4	Hras1	0.169897		Fgf4	Hras1	0.131987
Fgf4	Jun	0.220823		Fgf4	Jun	0.266442		Fgf4	Jun	0.510626		Fgf4	Jun	0.314438
Fgf4	Raf1	0.0545085		Fgf4	Raf1	0.0377667		Fgf4	Raf1	0.154615		Fgf4	Raf1	0.149686
Fgf4	Sos1	0.00584269		Fgf4	Sos1	0.0141758		Fgf4	Sos1	0.0228276		Fgf4	Sos1	0.152734
Fgf4	Sox11	0.34673		Fgf4	Sox11	0.112988		Fgf4	Sox11	0.0979178		Fgf4	Sox11	0.29456
Fgf4	Sox15	0.0432411		Fgf4	Sox15	0.105091		Fgf4	Sox15	0.164316		Fgf4	Sox15	0.0516543
Fgf4	Sox2	0.113214		Fgf4	Sox2	0.126406		Fgf4	Sox2	0.0839737		Fgf4	Sox2	0.0510859
Fgf5	Fgfr1	0.301329		Fgf5	Fgfr1	0.0717929		Fgf5	Fgfr1	0.099691		Fgf5	Fgfr1	0.185771
Fgf5	Fgfr2	0.136589		Fgf5	Fgfr2	0.161716		Fgf5	Fgfr2	0.0925599		Fgf5	Fgfr2	0.0275702
Fgf5	Fgfr3	0.240849		Fgf5	Fgfr3	0.158389		Fgf5	Fgfr3	0.101035		Fgf5	Fgfr3	0.393202
Fgf5	Fgfr4	0.0207201		Fgf5	Fgfr4	0.0204244		Fgf5	Fgfr4	0.0156524		Fgf5	Fgfr4	0.156928
Fgf5	Fos	0.629493		Fgf5	Fos	0.0951587		Fgf5	Fos	0.0423043		Fgf5	Fos	0.277876
Fgf5	Grb2	0.577044		Fgf5	Grb2	0.248852		Fgf5	Grb2	0.514093		Fgf5	Grb2	0.187525
Fgf5	Hras1	0.0305111		Fgf5	Hras1	0.131087		Fgf5	Hras1	0.0690259		Fgf5	Hras1	0.184259
Fgf5	Jun	0.0317294		Fgf5	Jun	0.0339932		Fgf5	Jun	0.0361675		Fgf5	Jun	0.157911
Fgf5	Raf1	0.112504		Fgf5	Raf1	0.195324		Fgf5	Raf1	0.126457		Fgf5	Raf1	0.105029
Fgf5	Sos1	0.0556786		Fgf5	Sos1	0.00582597		Fgf5	Sos1	0.00467873		Fgf5	Sos1	0.180664
Fgf6	Fgfr1	0.0486552		Fgf6	Fgfr1	0.1632		Fgf6	Fgfr1	0.0374134		Fgf6	Fgfr1	0.17288
Fgf6	Fgfr2	0.285633		Fgf6	Fgfr2	0.0552113		Fgf6	Fgfr2	0.0888181		Fgf6	Fgfr2	0.0646196
Fgf6	Fgfr3	0.0605524		Fgf6	Fgfr3	0.146041		Fgf6	Fgfr3	0.242363		Fgf6	Fgfr3	0.0667956
Fgf6	Fgfr4	0.0866792		Fgf6	Fgfr4	0.0846683		Fgf6	Fgfr4	0.0460824		Fgf6	Fgfr4	0.11803
Fgf6	Fos	0.0412431		Fgf6	Fos	0.0362192		Fgf6	Fos	0.017432		Fgf6	Fos	0.0817314
Fgf6	Grb2	0.0292048		Fgf6	Grb2	0.0513317		Fgf6	Grb2	0.0387232		Fgf6	Grb2	0.133508
Fgf6	Hras1	0.0134387		Fgf6	Hras1	0.0158338		Fgf6	Hras1	0.0829788		Fgf6	Hras1	0.124585
Fgf6	Jun	0.0895584		Fgf6	Jun	0.122333		Fgf6	Jun	0.261441		Fgf6	Jun	0.102054
Fgf6	Raf1	0.0186224		Fgf6	Raf1	0.125952		Fgf6	Raf1	0.107868		Fgf6	Raf1	0.0695635
Fgf6	Sos1	0.0185678		Fgf6	Sos1	0.0243288		Fgf6	Sos1	0.0136018		Fgf6	Sos1	0.0748952
Fgf7	Fgfr1	0.087383		Fgf7	Fgfr1	0.258094		Fgf7	Fgfr1	0.175967		Fgf7	Fgfr1	0.0578187
Fgf7	Fgfr2	0.07681		Fgf7	Fgfr2	0.0441191		Fgf7	Fgfr2	0.0542392		Fgf7	Fgfr2	0.197245
Fgf7	Fgfr3	0.474791		Fgf7	Fgfr3	0.42168		Fgf7	Fgfr3	0.304509		Fgf7	Fgfr3	0.0326857
Fgf7	Fgfr4	0.0558652		Fgf7	Fgfr4	0.261683		Fgf7	Fgfr4	0.148255		Fgf7	Fgfr4	0.0567255
Fgf7	Fos	0.348027		Fgf7	Fos	0.420785		Fgf7	Fos	0.572142		Fgf7	Fos	0.279909
Fgf7	Grb2	0.0655093		Fgf7	Grb2	0.920865		Fgf7	Grb2	0.692174		Fgf7	Grb2	0.311658
Fgf7	Hras1	0.0109048		Fgf7	Hras1	0.04147		Fgf7	Hras1	0.0197687		Fgf7	Hras1	0.0588583
Fgf7	Jun	0.0610517		Fgf7	Jun	0.190632		Fgf7	Jun	0.149451		Fgf7	Jun	0.151841
Fgf7	Raf1	0.0175284		Fgf7	Raf1	0.111707		Fgf7	Raf1	0.0927268		Fgf7	Raf1	0.0827712
Fgf7	Sos1	0.015022		Fgf7	Sos1	0.0454887		Fgf7	Sos1	0.0472355		Fgf7	Sos1	0.0731192
Fgf9	Araf	0.123338		Fgf9	Araf	0.192221		Fgf9	Araf	0.0642085		Fgf9	Araf	0.335909
Fgf9	Braf	0.0321199		Fgf9	Braf	0.56408		Fgf9	Braf	0.363448		Fgf9	Braf	0.168282
Fgf9	Ephb1	0.840136		Fgf9	Ephb1	0.599198		Fgf9	Ephb1	0.551427		Fgf9	Ephb1	0.113988
Fgf9	Fgfr1	0.0372231		Fgf9	Fgfr1	0.945505		Fgf9	Fgfr1	0.615779		Fgf9	Fgfr1	0.12094
Fgf9	Fgfr2	0.297295		Fgf9	Fgfr2	0.306057		Fgf9	Fgfr2	0.177569		Fgf9	Fgfr2	0.112675
Fgf9	Fgfr3	0.985498		Fgf9	Fgfr3	0.974948		Fgf9	Fgfr3	0.95754		Fgf9	Fgfr3	0.229655
Fgf9	Fgfr4	0.0492996		Fgf9	Fgfr4	0.490881		Fgf9	Fgfr4	0.634255		Fgf9	Fgfr4	0.0819596
Fgf9	Fos	0.0326106		Fgf9	Fos	0.00746509		Fgf9	Fos	0.0432014		Fgf9	Fos	0.181478
Fgf9	Grb2	0.0122548		Fgf9	Grb2	0.0637299		Fgf9	Grb2	0.036262		Fgf9	Grb2	0.120654
Fgf9	Hras1	0.753479		Fgf9	Hras1	0.168927		Fgf9	Hras1	0.126128		Fgf9	Hras1	0.564744
Fgf9	Jun	0.347228		Fgf9	Jun	0.537527		Fgf9	Jun	0.427288		Fgf9	Jun	0.0740727
Fgf9	Map2k1	0.0346089		Fgf9	Map2k1	0.0239204		Fgf9	Map2k1	0.0641989		Fgf9	Map2k1	0.109887
Fgf9	Map2k2	0.0194673		Fgf9	Map2k2	0.133374		Fgf9	Map2k2	0.197783		Fgf9	Map2k2	0.127228
Fgf9	Map2k3	0.0606466		Fgf9	Map2k3	0.278786		Fgf9	Map2k3	0.515079		Fgf9	Map2k3	0.0456711
Fgf9	Map2k5	0.0914727		Fgf9	Map2k5	0.647835		Fgf9	Map2k5	0.61176		Fgf9	Map2k5	0.121874
Fgf9	Map2k6	0.361753		Fgf9	Map2k6	0.459191		Fgf9	Map2k6	0.548288		Fgf9	Map2k6	0.516024
Fgf9	Mapk1	0.478232		Fgf9	Mapk1	0.0385694		Fgf9	Mapk1	0.03446		Fgf9	Mapk1	0.0711725
Fgf9	Mapk4	0.2478		Fgf9	Mapk4	0.852851		Fgf9	Mapk4	0.585471		Fgf9	Mapk4	0.203675
Fgf9	Mapk6	0.0602337		Fgf9	Mapk6	0.219813		Fgf9	Mapk6	0.18495		Fgf9	Mapk6	0.149391
Fgf9	Mapk7	0.0267909		Fgf9	Mapk7	0.127149		Fgf9	Mapk7	0.205872		Fgf9	Mapk7	0.0753896
Fgf9	Raf1	0.0524157		Fgf9	Raf1	0.0617511		Fgf9	Raf1	0.0681317		Fgf9	Raf1	0.152411
Fgf9	Sepp1	0.0201024		Fgf9	Sepp1	0.0173843		Fgf9	Sepp1	0.0266325		Fgf9	Sepp1	0.158179
Fgf9	Sos1	0.0663278		Fgf9	Sos1	0.0814358		Fgf9	Sos1	0.127522		Fgf9	Sos1	0.0815052
Fgfr1	Fgf8	0.00776094		Fgfr1	Fgf8	0.0264361		Fgfr1	Fgf8	0.0295834		Fgfr1	Fgf8	0.145239
Fgfr1	Fos	0.724239		Fgfr1	Fos	0.311877		Fgfr1	Fos	0.366494		Fgfr1	Fos	0.152717
Fgfr1	Grb2	0.0417037		Fgfr1	Grb2	0.0505474		Fgfr1	Grb2	0.0555625		Fgfr1	Grb2	0.193991
Fgfr1	Hras1	0.102068		Fgfr1	Hras1	0.50426		Fgfr1	Hras1	0.587491		Fgfr1	Hras1	0.0721725
Fgfr1	Jun	0.0210884		Fgfr1	Jun	0.805638		Fgfr1	Jun	0.538295		Fgfr1	Jun	0.0279244
Fgfr1	Raf1	0.0424755		Fgfr1	Raf1	0.161261		Fgfr1	Raf1	0.0862757		Fgfr1	Raf1	0.0811681
Fgfr1	Sos1	0.00957614		Fgfr1	Sos1	0.0969929		Fgfr1	Sos1	0.0979861		Fgfr1	Sos1	0.0794003
Fgfr2	Fgf8	0.0176703		Fgfr2	Fgf8	0.0764718		Fgfr2	Fgf8	0.160048		Fgfr2	Fgf8	0.249127
Fgfr2	Fos	0.0255462		Fgfr2	Fos	0.0937805		Fgfr2	Fos	0.0701461		Fgfr2	Fos	0.07636
Fgfr2	Grb2	0.00970217		Fgfr2	Grb2	0.164126		Fgfr2	Grb2	0.0412064		Fgfr2	Grb2	0.148916
Fgfr2	Hras1	0.0073169		Fgfr2	Hras1	0.118493		Fgfr2	Hras1	0.0480607		Fgfr2	Hras1	0.189955
Fgfr2	Jun	0.623191		Fgfr2	Jun	0.45937		Fgfr2	Jun	0.417507		Fgfr2	Jun	0.363704
Fgfr2	Raf1	0.0363983		Fgfr2	Raf1	0.453181		Fgfr2	Raf1	0.0778689		Fgfr2	Raf1	0.0256686
Fgfr2	Sos1	0.0200321		Fgfr2	Sos1	0.0127085		Fgfr2	Sos1	0.0288417		Fgfr2	Sos1	0.389073
Fgfr3	Fgf8	0.995012		Fgfr3	Fgf8	0.974748		Fgfr3	Fgf8	0.93264		Fgfr3	Fgf8	0.175086
Fgfr3	Fos	0.0187567		Fgfr3	Fos	0.0989165		Fgfr3	Fos	0.140453		Fgfr3	Fos	0.0633711
Fgfr3	Grb2	0.246008		Fgfr3	Grb2	0.00778926		Fgfr3	Grb2	0.0282546		Fgfr3	Grb2	0.143919
Fgfr3	Hras1	0.086547		Fgfr3	Hras1	0.138426		Fgfr3	Hras1	0.248916		Fgfr3	Hras1	0.104331
Fgfr3	Jun	0.0316116		Fgfr3	Jun	0.252365		Fgfr3	Jun	0.24665		Fgfr3	Jun	0.0771353
Fgfr3	Raf1	0.0723215		Fgfr3	Raf1	0.702729		Fgfr3	Raf1	0.566696		Fgfr3	Raf1	0.0581736
Fgfr3	Sos1	0.0442414		Fgfr3	Sos1	0.0411372		Fgfr3	Sos1	0.0171162		Fgfr3	Sos1	0.0720471
Fgfr4	Fgf8	0.0354523		Fgfr4	Fgf8	0.166605		Fgfr4	Fgf8	0.316663		Fgfr4	Fgf8	0.30509
Fgfr4	Fos	0.0629371		Fgfr4	Fos	0.0580136		Fgfr4	Fos	0.168457		Fgfr4	Fos	0.113132
Fgfr4	Grb2	0.0243246		Fgfr4	Grb2	0.587693		Fgfr4	Grb2	0.442647		Fgfr4	Grb2	0.164148
Fgfr4	Hras1	0.316341		Fgfr4	Hras1	0.787502		Fgfr4	Hras1	0.671743		Fgfr4	Hras1	0.0576207
Fgfr4	Jun	0.396743		Fgfr4	Jun	0.163464		Fgfr4	Jun	0.111547		Fgfr4	Jun	0.0787035
Fgfr4	Raf1	0.110369		Fgfr4	Raf1	0.776035		Fgfr4	Raf1	0.616861		Fgfr4	Raf1	0.104304
Fgfr4	Sos1	0.0958865		Fgfr4	Sos1	0.00721011		Fgfr4	Sos1	0.0834753		Fgfr4	Sos1	0.0778252
Fip1l1	Nanog	0.0228428		Fip1l1	Nanog	0.0852356		Fip1l1	Nanog	0.100598		Fip1l1	Nanog	0.198203
Fip1l1	Sox2	0.0170522		Fip1l1	Sox2	0.0991175		Fip1l1	Sox2	0.0681901		Fip1l1	Sox2	0.0447315
Fos	Fgf8	0.0490781		Fos	Fgf8	0.146728		Fos	Fgf8	0.0725616		Fos	Fgf8	0.160652
Fos	Lif	0.0176951		Fos	Lif	0.245206		Fos	Lif	0.123057		Fos	Lif	0.0244664
Fos	Lifr	0.0546475		Fos	Lifr	0.10464		Fos	Lifr	0.0792466		Fos	Lifr	0.360344
Fos	Ptpn11	0.0505459		Fos	Ptpn11	0.327618		Fos	Ptpn11	0.265741		Fos	Ptpn11	0.274502
Fos	Raf1	0.00952457		Fos	Raf1	0.0220193		Fos	Raf1	0.0219983		Fos	Raf1	0.115783
Fos	Sos1	0.0621785		Fos	Sos1	0.247915		Fos	Sos1	0.214182		Fos	Sos1	0.0716057
Foxd3	Gli1	0.115575		Foxd3	Gli1	0.225979		Foxd3	Gli1	0.0730396		Foxd3	Gli1	0.0992961
Foxd3	Nanog	0.0306851		Foxd3	Nanog	0.0366338		Foxd3	Nanog	0.0184815		Foxd3	Nanog	0.136068
Foxd3	Shh	0.0123689		Foxd3	Shh	0.0917897		Foxd3	Shh	0.0338103		Foxd3	Shh	0.12064
Foxd3	Sox2	0.0494578		Foxd3	Sox2	0.153155		Foxd3	Sox2	0.0607113		Foxd3	Sox2	0.0631628
Fzd1	Dvl1	0.0100556		Fzd1	Dvl1	0.0615451		Fzd1	Dvl1	0.0441838		Fzd1	Dvl1	0.0791547
Fzd1	Gsk3b	0.0592591		Fzd1	Gsk3b	0.190652		Fzd1	Gsk3b	0.0717364		Fzd1	Gsk3b	0.151846
Fzd1	Lrp5	0.0802994		Fzd1	Lrp5	0.21658		Fzd1	Lrp5	0.0149343		Fzd1	Lrp5	0.0596337
Fzd1	Lrp6	0.178592		Fzd1	Lrp6	0.229921		Fzd1	Lrp6	0.384943		Fzd1	Lrp6	0.0501739
Fzd1	Wnt1	0.0381937		Fzd1	Wnt1	0.0936141		Fzd1	Wnt1	0.0743179		Fzd1	Wnt1	0.150275
Fzd1	Wnt2	0.0169559		Fzd1	Wnt2	0.171144		Fzd1	Wnt2	0.339127		Fzd1	Wnt2	0.445763
Fzd1	Wnt2b	0.497843		Fzd1	Wnt2b	0.417081		Fzd1	Wnt2b	0.205048		Fzd1	Wnt2b	0.0664032
Fzd1	Wnt3	0.0706778		Fzd1	Wnt3	0.139021		Fzd1	Wnt3	0.57596		Fzd1	Wnt3	0.00938035
Fzd1	Wnt3a	0.0369754		Fzd1	Wnt3a	0.039674		Fzd1	Wnt3a	0.257777		Fzd1	Wnt3a	0.277786
Fzd1	Wnt4	0.192889		Fzd1	Wnt4	0.119234		Fzd1	Wnt4	0.0984181		Fzd1	Wnt4	0.0588475
Fzd1	Wnt5a	0.0497123		Fzd1	Wnt5a	0.224481		Fzd1	Wnt5a	0.0612225		Fzd1	Wnt5a	0.162309
Fzd1	Wnt5b	0.0190018		Fzd1	Wnt5b	0.0350427		Fzd1	Wnt5b	0.0261835		Fzd1	Wnt5b	0.0454324
Fzd1	Wnt7a	0.0650779		Fzd1	Wnt7a	0.0825906		Fzd1	Wnt7a	0.0926861		Fzd1	Wnt7a	0.143542
Fzd1	Wnt7b	0.0745529		Fzd1	Wnt7b	0.0313838		Fzd1	Wnt7b	0.0574003		Fzd1	Wnt7b	0.0707974
Fzd2	Dvl1	0.0678404		Fzd2	Dvl1	0.094371		Fzd2	Dvl1	0.0995315		Fzd2	Dvl1	0.0689813
Fzd2	Wnt1	0.0426986		Fzd2	Wnt1	0.0388062		Fzd2	Wnt1	0.0469223		Fzd2	Wnt1	0.0662072
Fzd2	Wnt16	0.0562791		Fzd2	Wnt16	0.285869		Fzd2	Wnt16	0.0933767		Fzd2	Wnt16	0.150951
Fzd2	Wnt2	0.336258		Fzd2	Wnt2	0.124708		Fzd2	Wnt2	0.107087		Fzd2	Wnt2	0.136952
Fzd2	Wnt3	0.0485622		Fzd2	Wnt3	0.0604171		Fzd2	Wnt3	0.0311929		Fzd2	Wnt3	0.050963
Fzd2	Wnt3a	0.0340362		Fzd2	Wnt3a	0.0106455		Fzd2	Wnt3a	0.0599389		Fzd2	Wnt3a	0.0974092
Fzd2	Wnt4	0.00972595		Fzd2	Wnt4	0.0918139		Fzd2	Wnt4	0.308931		Fzd2	Wnt4	0.207788
Fzd2	Wnt5a	0.00354324		Fzd2	Wnt5a	0.0606432		Fzd2	Wnt5a	0.0428044		Fzd2	Wnt5a	0.104295
Fzd2	Wnt5b	0.0270753		Fzd2	Wnt5b	0.0697375		Fzd2	Wnt5b	0.02483		Fzd2	Wnt5b	0.0512921
Fzd2	Wnt6	0.0294105		Fzd2	Wnt6	0.0137286		Fzd2	Wnt6	0.0467236		Fzd2	Wnt6	0.0672393
Fzd2	Wnt7a	0.0194276		Fzd2	Wnt7a	0.122213		Fzd2	Wnt7a	0.197457		Fzd2	Wnt7a	0.413962
Fzd2	Wnt7b	0.016204		Fzd2	Wnt7b	0.345683		Fzd2	Wnt7b	0.359688		Fzd2	Wnt7b	0.259417
Fzd3	Axin1	0.0306093		Fzd3	Axin1	0.199421		Fzd3	Axin1	0.241906		Fzd3	Axin1	0.149426
Fzd3	Dvl1	0.0129704		Fzd3	Dvl1	0.393853		Fzd3	Dvl1	0.267981		Fzd3	Dvl1	0.207924
Fzd3	Gsk3b	0.100966		Fzd3	Gsk3b	0.123184		Fzd3	Gsk3b	0.165168		Fzd3	Gsk3b	0.258256
Fzd3	Lrp5	0.0683276		Fzd3	Lrp5	0.30648		Fzd3	Lrp5	0.159509		Fzd3	Lrp5	0.0976627
Fzd3	Lrp6	0.0879076		Fzd3	Lrp6	0.116626		Fzd3	Lrp6	0.0650668		Fzd3	Lrp6	0.0788172
Fzd3	Wnt1	0.016067		Fzd3	Wnt1	0.124213		Fzd3	Wnt1	0.0499024		Fzd3	Wnt1	0.106727
Fzd3	Wnt16	0.0268585		Fzd3	Wnt16	0.229878		Fzd3	Wnt16	0.173827		Fzd3	Wnt16	0.238286
Fzd3	Wnt2	0.00147405		Fzd3	Wnt2	0.257164		Fzd3	Wnt2	0.258953		Fzd3	Wnt2	0.133561
Fzd3	Wnt2b	0.144769		Fzd3	Wnt2b	0.30582		Fzd3	Wnt2b	0.104133		Fzd3	Wnt2b	0.0425091
Fzd3	Wnt3	0.0944452		Fzd3	Wnt3	0.176885		Fzd3	Wnt3	0.223677		Fzd3	Wnt3	0.131437
Fzd3	Wnt3a	0.330856		Fzd3	Wnt3a	0.254322		Fzd3	Wnt3a	0.30962		Fzd3	Wnt3a	0.0209073
Fzd3	Wnt4	0.0346889		Fzd3	Wnt4	0.0345029		Fzd3	Wnt4	0.0750471		Fzd3	Wnt4	0.0618523
Fzd3	Wnt5a	0.11567		Fzd3	Wnt5a	0.332788		Fzd3	Wnt5a	0.125156		Fzd3	Wnt5a	0.0221706
Fzd3	Wnt5b	0.0731342		Fzd3	Wnt5b	0.290234		Fzd3	Wnt5b	0.558366		Fzd3	Wnt5b	0.0267504
Fzd3	Wnt6	0.0940381		Fzd3	Wnt6	0.0865356		Fzd3	Wnt6	0.398767		Fzd3	Wnt6	0.186314
Fzd3	Wnt7a	0.0267364		Fzd3	Wnt7a	0.172578		Fzd3	Wnt7a	0.188821		Fzd3	Wnt7a	0.033366
Fzd3	Wnt7b	0.0364985		Fzd3	Wnt7b	0.153902		Fzd3	Wnt7b	0.248028		Fzd3	Wnt7b	0.126973
Fzd3	Wnt9b	0.030402		Fzd3	Wnt9b	0.0620966		Fzd3	Wnt9b	0.0559338		Fzd3	Wnt9b	0.0822263
Fzd4	Axin1	0.029441		Fzd4	Axin1	0.0309887		Fzd4	Axin1	0.0216015		Fzd4	Axin1	0.0771125
Fzd4	Dvl1	0.0886164		Fzd4	Dvl1	0.0299997		Fzd4	Dvl1	0.0549337		Fzd4	Dvl1	0.0743766
Fzd4	Gsk3b	0.00786048		Fzd4	Gsk3b	0.086918		Fzd4	Gsk3b	0.127912		Fzd4	Gsk3b	0.0165692
Fzd4	Lrp5	0.00217416		Fzd4	Lrp5	0.0693145		Fzd4	Lrp5	0.347566		Fzd4	Lrp5	0.0291084
Fzd4	Lrp6	0.24227		Fzd4	Lrp6	0.0976792		Fzd4	Lrp6	0.0954046		Fzd4	Lrp6	0.0178193
Fzd4	Wnt1	0.0641771		Fzd4	Wnt1	0.018523		Fzd4	Wnt1	0.0206474		Fzd4	Wnt1	0.103853
Fzd4	Wnt16	0.0923118		Fzd4	Wnt16	0.0781639		Fzd4	Wnt16	0.0570805		Fzd4	Wnt16	0.0490225
Fzd4	Wnt2	0.364328		Fzd4	Wnt2	0.0611875		Fzd4	Wnt2	0.163137		Fzd4	Wnt2	0.087601
Fzd4	Wnt2b	0.204937		Fzd4	Wnt2b	0.202476		Fzd4	Wnt2b	0.245047		Fzd4	Wnt2b	0.0562815
Fzd4	Wnt3	0.603308		Fzd4	Wnt3	0.152117		Fzd4	Wnt3	0.484211		Fzd4	Wnt3	0.359854
Fzd4	Wnt3a	0.999436		Fzd4	Wnt3a	0.98193		Fzd4	Wnt3a	0.97008		Fzd4	Wnt3a	0.221537
Fzd4	Wnt4	0.231283		Fzd4	Wnt4	0.208665		Fzd4	Wnt4	0.367651		Fzd4	Wnt4	0.107379
Fzd4	Wnt5a	0.797006		Fzd4	Wnt5a	0.693713		Fzd4	Wnt5a	0.588495		Fzd4	Wnt5a	0.126114
Fzd4	Wnt5b	0.694094		Fzd4	Wnt5b	0.888872		Fzd4	Wnt5b	0.63754		Fzd4	Wnt5b	0.332695
Fzd4	Wnt6	0.170954		Fzd4	Wnt6	0.0651698		Fzd4	Wnt6	0.111136		Fzd4	Wnt6	0.571092
Fzd4	Wnt7a	0.0107525		Fzd4	Wnt7a	0.229742		Fzd4	Wnt7a	0.137706		Fzd4	Wnt7a	0.137505
Fzd4	Wnt7b	0.0340786		Fzd4	Wnt7b	0.0636212		Fzd4	Wnt7b	0.0266788		Fzd4	Wnt7b	0.164431
Fzd4	Wnt9b	0.309761		Fzd4	Wnt9b	0.235252		Fzd4	Wnt9b	0.132007		Fzd4	Wnt9b	0.086114
Fzd5	Axin1	0.0937169		Fzd5	Axin1	0.0242504		Fzd5	Axin1	0.0103886		Fzd5	Axin1	0.0785244
Fzd5	Dvl1	0.763524		Fzd5	Dvl1	0.610451		Fzd5	Dvl1	0.480491		Fzd5	Dvl1	0.485068
Fzd5	Lrp5	0.0795027		Fzd5	Lrp5	0.0232206		Fzd5	Lrp5	0.0385215		Fzd5	Lrp5	0.107946
Fzd5	Lrp6	0.952481		Fzd5	Lrp6	0.712586		Fzd5	Lrp6	0.3742		Fzd5	Lrp6	0.178853
Fzd5	Wnt1	0.774771		Fzd5	Wnt1	0.882742		Fzd5	Wnt1	0.875993		Fzd5	Wnt1	0.187776
Fzd5	Wnt16	0.00997594		Fzd5	Wnt16	0.0637551		Fzd5	Wnt16	0.0245978		Fzd5	Wnt16	0.0637155
Fzd5	Wnt2	0.123997		Fzd5	Wnt2	0.128583		Fzd5	Wnt2	0.0964852		Fzd5	Wnt2	0.0144981
Fzd5	Wnt2b	0.263982		Fzd5	Wnt2b	0.124424		Fzd5	Wnt2b	0.0706158		Fzd5	Wnt2b	0.101279
Fzd5	Wnt3	0.0425504		Fzd5	Wnt3	0.0413145		Fzd5	Wnt3	0.0294808		Fzd5	Wnt3	0.179787
Fzd5	Wnt3a	0.905923		Fzd5	Wnt3a	0.402231		Fzd5	Wnt3a	0.17838		Fzd5	Wnt3a	0.630359
Fzd5	Wnt4	0.0667607		Fzd5	Wnt4	0.193711		Fzd5	Wnt4	0.0910097		Fzd5	Wnt4	0.620119
Fzd5	Wnt5a	0.465685		Fzd5	Wnt5a	0.628252		Fzd5	Wnt5a	0.530858		Fzd5	Wnt5a	0.158327
Fzd5	Wnt5b	0.459165		Fzd5	Wnt5b	0.433657		Fzd5	Wnt5b	0.478034		Fzd5	Wnt5b	0.0788352
Fzd5	Wnt6	0.671437		Fzd5	Wnt6	0.751855		Fzd5	Wnt6	0.858218		Fzd5	Wnt6	0.0486829
Fzd5	Wnt7a	0.155803		Fzd5	Wnt7a	0.0163785		Fzd5	Wnt7a	0.0186538		Fzd5	Wnt7a	0.218443
Fzd5	Wnt7b	0.353658		Fzd5	Wnt7b	0.16855		Fzd5	Wnt7b	0.44262		Fzd5	Wnt7b	0.0156085
Fzd5	Wnt9b	0.993395		Fzd5	Wnt9b	0.227305		Fzd5	Wnt9b	0.473032		Fzd5	Wnt9b	0.206557
Fzd6	Axin1	0.875916		Fzd6	Axin1	0.658874		Fzd6	Axin1	0.743299		Fzd6	Axin1	0.179059
Fzd6	Dvl1	0.214836		Fzd6	Dvl1	0.0323656		Fzd6	Dvl1	0.0335015		Fzd6	Dvl1	0.0554807
Fzd6	Gsk3b	0.875838		Fzd6	Gsk3b	0.542493		Fzd6	Gsk3b	0.618405		Fzd6	Gsk3b	0.449782
Fzd6	Lrp5	0.150997		Fzd6	Lrp5	0.0635496		Fzd6	Lrp5	0.0239641		Fzd6	Lrp5	0.318651
Fzd6	Lrp6	0.656487		Fzd6	Lrp6	0.0590059		Fzd6	Lrp6	0.020294		Fzd6	Lrp6	0.140834
Fzd6	Wnt1	0.336633		Fzd6	Wnt1	0.231969		Fzd6	Wnt1	0.125534		Fzd6	Wnt1	0.0446527
Fzd6	Wnt16	0.121668		Fzd6	Wnt16	0.0781933		Fzd6	Wnt16	0.0962365		Fzd6	Wnt16	0.102587
Fzd6	Wnt2	0.110263		Fzd6	Wnt2	0.0304258		Fzd6	Wnt2	0.0844535		Fzd6	Wnt2	0.113355
Fzd6	Wnt2b	0.218619		Fzd6	Wnt2b	0.238674		Fzd6	Wnt2b	0.2103		Fzd6	Wnt2b	0.0244717
Fzd6	Wnt3	0.93506		Fzd6	Wnt3	0.798589		Fzd6	Wnt3	0.64646		Fzd6	Wnt3	0.207868
Fzd6	Wnt3a	0.229851		Fzd6	Wnt3a	0.0517874		Fzd6	Wnt3a	0.0840387		Fzd6	Wnt3a	0.0129867
Fzd6	Wnt4	0.739675		Fzd6	Wnt4	0.257061		Fzd6	Wnt4	0.392724		Fzd6	Wnt4	0.252382
Fzd6	Wnt5a	0.932044		Fzd6	Wnt5a	0.932053		Fzd6	Wnt5a	0.964381		Fzd6	Wnt5a	0.370476
Fzd6	Wnt5b	0.50186		Fzd6	Wnt5b	0.524157		Fzd6	Wnt5b	0.544782		Fzd6	Wnt5b	0.21769
Fzd6	Wnt6	0.0525716		Fzd6	Wnt6	0.032947		Fzd6	Wnt6	0.14765		Fzd6	Wnt6	0.038689
Fzd6	Wnt7a	0.796977		Fzd6	Wnt7a	0.370575		Fzd6	Wnt7a	0.864924		Fzd6	Wnt7a	0.586756
Fzd6	Wnt7b	0.927377		Fzd6	Wnt7b	0.205085		Fzd6	Wnt7b	0.671473		Fzd6	Wnt7b	0.24913
Fzd6	Wnt9b	0.487722		Fzd6	Wnt9b	0.206884		Fzd6	Wnt9b	0.77029		Fzd6	Wnt9b	0.418857
Fzd7	Axin1	0.00382168		Fzd7	Axin1	0.0801838		Fzd7	Axin1	0.262598		Fzd7	Axin1	0.311244
Fzd7	Dvl1	0.0379425		Fzd7	Dvl1	0.0514527		Fzd7	Dvl1	0.183291		Fzd7	Dvl1	0.0367285
Fzd7	Gsk3b	0.00981975		Fzd7	Gsk3b	0.170219		Fzd7	Gsk3b	0.253883		Fzd7	Gsk3b	0.193411
Fzd7	Lrp5	0.0332461		Fzd7	Lrp5	0.168551		Fzd7	Lrp5	0.119272		Fzd7	Lrp5	0.0746928
Fzd7	Lrp6	0.164795		Fzd7	Lrp6	0.115085		Fzd7	Lrp6	0.0835325		Fzd7	Lrp6	0.164057
Fzd7	Wnt1	0.22724		Fzd7	Wnt1	0.0410009		Fzd7	Wnt1	0.134259		Fzd7	Wnt1	0.0634234
Fzd7	Wnt16	0.266345		Fzd7	Wnt16	0.379101		Fzd7	Wnt16	0.310727		Fzd7	Wnt16	0.165956
Fzd7	Wnt2	0.0244053		Fzd7	Wnt2	0.314599		Fzd7	Wnt2	0.309803		Fzd7	Wnt2	0.0435776
Fzd7	Wnt2b	0.0134623		Fzd7	Wnt2b	0.241403		Fzd7	Wnt2b	0.149107		Fzd7	Wnt2b	0.121612
Fzd7	Wnt3	0.0145611		Fzd7	Wnt3	0.0979803		Fzd7	Wnt3	0.0466747		Fzd7	Wnt3	0.0245158
Fzd7	Wnt3a	0.0516699		Fzd7	Wnt3a	0.0349858		Fzd7	Wnt3a	0.0159496		Fzd7	Wnt3a	0.0162401
Fzd7	Wnt4	0.191883		Fzd7	Wnt4	0.381168		Fzd7	Wnt4	0.255025		Fzd7	Wnt4	0.120492
Fzd7	Wnt5a	0.509616		Fzd7	Wnt5a	0.276399		Fzd7	Wnt5a	0.800114		Fzd7	Wnt5a	0.147406
Fzd7	Wnt5b	0.0549682		Fzd7	Wnt5b	0.419705		Fzd7	Wnt5b	0.168589		Fzd7	Wnt5b	0.106429
Fzd7	Wnt6	0.0151642		Fzd7	Wnt6	0.177065		Fzd7	Wnt6	0.275359		Fzd7	Wnt6	0.11041
Fzd7	Wnt7a	0.146373		Fzd7	Wnt7a	0.391326		Fzd7	Wnt7a	0.454471		Fzd7	Wnt7a	0.111451
Fzd7	Wnt7b	0.172084		Fzd7	Wnt7b	0.15392		Fzd7	Wnt7b	0.363367		Fzd7	Wnt7b	0.153176
Fzd7	Wnt9b	0.00530284		Fzd7	Wnt9b	0.194976		Fzd7	Wnt9b	0.114574		Fzd7	Wnt9b	0.0576181
Fzd8	Axin1	0.270102		Fzd8	Axin1	0.336444		Fzd8	Axin1	0.224056		Fzd8	Axin1	0.159607
Fzd8	Dvl1	0.0876315		Fzd8	Dvl1	0.322637		Fzd8	Dvl1	0.223434		Fzd8	Dvl1	0.26346
Fzd8	Gsk3b	0.0373635		Fzd8	Gsk3b	0.0940489		Fzd8	Gsk3b	0.0518715		Fzd8	Gsk3b	0.0932233
Fzd8	Lrp5	0.00675225		Fzd8	Lrp5	0.19039		Fzd8	Lrp5	0.0855265		Fzd8	Lrp5	0.0917028
Fzd8	Lrp6	0.0169715		Fzd8	Lrp6	0.0247059		Fzd8	Lrp6	0.0314307		Fzd8	Lrp6	0.105673
Fzd8	Wnt1	0.00307214		Fzd8	Wnt1	0.0168019		Fzd8	Wnt1	0.0280291		Fzd8	Wnt1	0.0689914
Fzd8	Wnt16	0.36436		Fzd8	Wnt16	0.277702		Fzd8	Wnt16	0.504757		Fzd8	Wnt16	0.138311
Fzd8	Wnt2	0.823834		Fzd8	Wnt2	0.807863		Fzd8	Wnt2	0.960227		Fzd8	Wnt2	0.166928
Fzd8	Wnt2b	0.0130872		Fzd8	Wnt2b	0.0408619		Fzd8	Wnt2b	0.323212		Fzd8	Wnt2b	0.157858
Fzd8	Wnt3	0.179977		Fzd8	Wnt3	0.101252		Fzd8	Wnt3	0.108618		Fzd8	Wnt3	0.0940989
Fzd8	Wnt3a	0.0163829		Fzd8	Wnt3a	0.198245		Fzd8	Wnt3a	0.0907157		Fzd8	Wnt3a	0.119198
Fzd8	Wnt4	0.0514596		Fzd8	Wnt4	0.260141		Fzd8	Wnt4	0.206651		Fzd8	Wnt4	0.102521
Fzd8	Wnt5a	0.00805303		Fzd8	Wnt5a	0.241554		Fzd8	Wnt5a	0.127465		Fzd8	Wnt5a	0.0343301
Fzd8	Wnt5b	0.0876541		Fzd8	Wnt5b	0.204194		Fzd8	Wnt5b	0.229449		Fzd8	Wnt5b	0.0682381
Fzd8	Wnt6	0.0879437		Fzd8	Wnt6	0.916509		Fzd8	Wnt6	0.903354		Fzd8	Wnt6	0.0543995
Fzd8	Wnt7a	0.0473121		Fzd8	Wnt7a	0.079973		Fzd8	Wnt7a	0.173466		Fzd8	Wnt7a	0.19622
Fzd8	Wnt7b	0.0184987		Fzd8	Wnt7b	0.0546777		Fzd8	Wnt7b	0.0772687		Fzd8	Wnt7b	0.0737789
Fzd8	Wnt9b	0.0234395		Fzd8	Wnt9b	0.150917		Fzd8	Wnt9b	0.0919188		Fzd8	Wnt9b	0.149502
Fzd9	Dvl1	0.0916758		Fzd9	Dvl1	0.146185		Fzd9	Dvl1	0.12648		Fzd9	Dvl1	0.114015
Fzd9	Gsk3b	0.068776		Fzd9	Gsk3b	0.070486		Fzd9	Gsk3b	0.0480225		Fzd9	Gsk3b	0.0684557
Fzd9	Wnt1	0.0269063		Fzd9	Wnt1	0.0386458		Fzd9	Wnt1	0.262383		Fzd9	Wnt1	0.205294
Fzd9	Wnt16	0.0695563		Fzd9	Wnt16	0.360059		Fzd9	Wnt16	0.719001		Fzd9	Wnt16	0.425406
Fzd9	Wnt2	0.0227607		Fzd9	Wnt2	0.0923099		Fzd9	Wnt2	0.125132		Fzd9	Wnt2	0.0784806
Fzd9	Wnt3	0.102642		Fzd9	Wnt3	0.416026		Fzd9	Wnt3	0.284248		Fzd9	Wnt3	0.110144
Fzd9	Wnt3a	0.0306235		Fzd9	Wnt3a	0.160526		Fzd9	Wnt3a	0.121218		Fzd9	Wnt3a	0.105154
Fzd9	Wnt4	0.00573101		Fzd9	Wnt4	0.184878		Fzd9	Wnt4	0.364835		Fzd9	Wnt4	0.185981
Fzd9	Wnt5a	0.0222389		Fzd9	Wnt5a	0.122571		Fzd9	Wnt5a	0.0687574		Fzd9	Wnt5a	0.185724
Fzd9	Wnt5b	0.0384934		Fzd9	Wnt5b	0.0888433		Fzd9	Wnt5b	0.167915		Fzd9	Wnt5b	0.138944
Fzd9	Wnt6	0.014725		Fzd9	Wnt6	0.0778986		Fzd9	Wnt6	0.0778287		Fzd9	Wnt6	0.0178489
Fzd9	Wnt7a	0.0252397		Fzd9	Wnt7a	0.0359419		Fzd9	Wnt7a	0.102409		Fzd9	Wnt7a	0.31874
Fzd9	Wnt7b	0.163496		Fzd9	Wnt7b	0.0712353		Fzd9	Wnt7b	0.185853		Fzd9	Wnt7b	0.220685
G0s2	Esrrb	0.0887462		G0s2	Esrrb	0.121418		G0s2	Esrrb	0.233825		G0s2	Esrrb	0.19381
Gab1	Akt1	0.0771687		Gab1	Akt1	0.448134		Gab1	Akt1	0.327427		Gab1	Akt1	0.0464745
Gab1	Akt3	0.220662		Gab1	Akt3	0.116457		Gab1	Akt3	0.168283		Gab1	Akt3	0.118273
Gab1	Egf	0.944123		Gab1	Egf	0.276306		Gab1	Egf	0.43076		Gab1	Egf	0.141881
Gab1	Egfr	0.266201		Gab1	Egfr	0.139164		Gab1	Egfr	0.177682		Gab1	Egfr	0.266722
Gab1	Jak1	0.999999		Gab1	Jak1	0.666135		Gab1	Jak1	0.986853		Gab1	Jak1	0.368178
Gab1	Pik3cd	0.200199		Gab1	Pik3cd	0.14301		Gab1	Pik3cd	0.100079		Gab1	Pik3cd	0.0936654
Gab1	Pik3r2	0.12901		Gab1	Pik3r2	0.307775		Gab1	Pik3r2	0.182911		Gab1	Pik3r2	0.105907
Gab1	Ptpn11	0.33488		Gab1	Ptpn11	0.104489		Gab1	Ptpn11	0.211668		Gab1	Ptpn11	0.0975256
Gata6	Eed	0.380141		Gata6	Eed	0.424596		Gata6	Eed	0.434277		Gata6	Eed	0.0750746
Gata6	Nanog	0.23154		Gata6	Nanog	0.248135		Gata6	Nanog	0.262764		Gata6	Nanog	0.0971981
Gata6	Paf1	0.523461		Gata6	Paf1	0.391108		Gata6	Paf1	0.270856		Gata6	Paf1	0.239884
Gata6	Sox2	0.12113		Gata6	Sox2	0.0510717		Gata6	Sox2	0.0720794		Gata6	Sox2	0.220747
Gata6	Tet1	0.294924		Gata6	Tet1	0.109154		Gata6	Tet1	0.168904		Gata6	Tet1	0.0705562
Gata6	Thap11	0.0788621		Gata6	Thap11	0.269618		Gata6	Thap11	0.181691		Gata6	Thap11	0.105361
Gli1	Notch1	1		Gli1	Notch1	0.897969		Gli1	Notch1	0.992785		Gli1	Notch1	0.880174
Gli1	Prkcc	0.6881		Gli1	Prkcc	0.704497		Gli1	Prkcc	0.434803		Gli1	Prkcc	0.227707
Gli1	Shh	0.7688		Gli1	Shh	0.248413		Gli1	Shh	0.573939		Gli1	Shh	0.094561
Gli1	Sox2	0.146905		Gli1	Sox2	0.378382		Gli1	Sox2	0.47259		Gli1	Sox2	0.22241
Gli1	Wnt1	0.965792		Gli1	Wnt1	0.399082		Gli1	Wnt1	0.77207		Gli1	Wnt1	0.114012
Grb2	Fgf8	0.999938		Grb2	Fgf8	0.954285		Grb2	Fgf8	0.995446		Grb2	Fgf8	0.24404
Grb2	Hras1	0.0493127		Grb2	Hras1	0.731875		Grb2	Hras1	0.538347		Grb2	Hras1	0.0708978
Grb2	Jak1	0.0474831		Grb2	Jak1	0.469579		Grb2	Jak1	0.17034		Grb2	Jak1	0.23021
Grb2	Lif	0.916595		Grb2	Lif	0.859456		Grb2	Lif	0.832035		Grb2	Lif	0.159863
Grb2	Ptpn11	0.999974		Grb2	Ptpn11	0.856447		Grb2	Ptpn11	0.994747		Grb2	Ptpn11	0.394886
Grb2	Sos1	0.0265708		Grb2	Sos1	0.135202		Grb2	Sos1	0.412215		Grb2	Sos1	0.433058
Grm5	Lifr	0.0680738		Grm5	Lifr	0.058051		Grm5	Lifr	0.104485		Grm5	Lifr	0.173982
Grm5	Myc	0.0147596		Grm5	Myc	0.160854		Grm5	Myc	0.113305		Grm5	Myc	0.0514096
Gsk3b	Akt1	0.0319983		Gsk3b	Akt1	0.0669132		Gsk3b	Akt1	0.0472233		Gsk3b	Akt1	0.0424427
Gsk3b	Apc	0.0103029		Gsk3b	Apc	0.292213		Gsk3b	Apc	0.413719		Gsk3b	Apc	0.068489
Gsk3b	Ctnnb1	0.0300168		Gsk3b	Ctnnb1	0.0535568		Gsk3b	Ctnnb1	0.0295048		Gsk3b	Ctnnb1	0.0942929
Gsk3b	Dvl1	0.0981144		Gsk3b	Dvl1	0.0417124		Gsk3b	Dvl1	0.060145		Gsk3b	Dvl1	0.202149
Gsk3b	Fzd2	0.0550307		Gsk3b	Fzd2	0.133565		Gsk3b	Fzd2	0.0564625		Gsk3b	Fzd2	0.150894
Gsk3b	Hnf1a	0.0430773		Gsk3b	Hnf1a	0.117858		Gsk3b	Hnf1a	0.155371		Gsk3b	Hnf1a	0.124012
Gsk3b	Lif	0.158263		Gsk3b	Lif	0.330234		Gsk3b	Lif	0.327878		Gsk3b	Lif	0.0573203
Gsk3b	Myc	0.13044		Gsk3b	Myc	0.110298		Gsk3b	Myc	0.0663568		Gsk3b	Myc	0.0644645
Gsk3b	Wnt1	0.0964236		Gsk3b	Wnt1	0.120937		Gsk3b	Wnt1	0.242956		Gsk3b	Wnt1	0.088175
Gsk3b	Wnt16	0.0213294		Gsk3b	Wnt16	0.0277862		Gsk3b	Wnt16	0.0301672		Gsk3b	Wnt16	0.0722401
Gsk3b	Wnt2	0.0283656		Gsk3b	Wnt2	0.035004		Gsk3b	Wnt2	0.0276684		Gsk3b	Wnt2	0.0771172
Gsk3b	Wnt3	0.0930599		Gsk3b	Wnt3	0.363345		Gsk3b	Wnt3	0.215602		Gsk3b	Wnt3	0.0866456
Gsk3b	Wnt3a	0.0367		Gsk3b	Wnt3a	0.205749		Gsk3b	Wnt3a	0.0529103		Gsk3b	Wnt3a	0.0737591
Gsk3b	Wnt4	0.0295823		Gsk3b	Wnt4	0.134123		Gsk3b	Wnt4	0.119639		Gsk3b	Wnt4	0.0660957
Gsk3b	Wnt5a	0.14529		Gsk3b	Wnt5a	0.567842		Gsk3b	Wnt5a	0.671214		Gsk3b	Wnt5a	0.190012
Gsk3b	Wnt5b	0.123173		Gsk3b	Wnt5b	0.0385905		Gsk3b	Wnt5b	0.230112		Gsk3b	Wnt5b	0.0416335
Gsk3b	Wnt6	0.109269		Gsk3b	Wnt6	0.345958		Gsk3b	Wnt6	0.210551		Gsk3b	Wnt6	0.221037
Gsk3b	Wnt7a	0.205991		Gsk3b	Wnt7a	0.923549		Gsk3b	Wnt7a	0.294688		Gsk3b	Wnt7a	0.288252
Gsk3b	Wnt7b	0.866384		Gsk3b	Wnt7b	0.12116		Gsk3b	Wnt7b	0.756174		Gsk3b	Wnt7b	0.39771
H3f3a	Ascl1	0.0213966		H3f3a	Ascl1	0.0344746		H3f3a	Ascl1	0.0583432		H3f3a	Ascl1	0.12853
H3f3a	Bmi1	0.0194272		H3f3a	Bmi1	0.0619543		H3f3a	Bmi1	0.0300739		H3f3a	Bmi1	0.0118202
H3f3a	Eed	0.0419639		H3f3a	Eed	0.0550763		H3f3a	Eed	0.0451785		H3f3a	Eed	0.0630092
H3f3a	Ezh1	0.373272		H3f3a	Ezh1	0.206335		H3f3a	Ezh1	0.237738		H3f3a	Ezh1	0.130275
H3f3a	Ikzf1	0.0266915		H3f3a	Ikzf1	0.130258		H3f3a	Ikzf1	0.101094		H3f3a	Ikzf1	0.212371
H3f3a	Irx3	0.077746		H3f3a	Irx3	0.0632027		H3f3a	Irx3	0.0315957		H3f3a	Irx3	0.0114447
H3f3a	Msx1	0.190044		H3f3a	Msx1	0.112288		H3f3a	Msx1	0.0873734		H3f3a	Msx1	0.0651818
H3f3a	Myf5	0.0261322		H3f3a	Myf5	0.001882		H3f3a	Myf5	0.00151755		H3f3a	Myf5	0.107137
H3f3a	Nkx2-2	0.815375		H3f3a	Nkx2-2	0.123751		H3f3a	Nkx2-2	0.157444		H3f3a	Nkx2-2	0.130788
H3f3a	Nkx2-9	0.00331565		H3f3a	Nkx2-9	0.011046		H3f3a	Nkx2-9	0.00864823		H3f3a	Nkx2-9	0.101413
H3f3a	Pax3	0.0843224		H3f3a	Pax3	0.157403		H3f3a	Pax3	0.204452		H3f3a	Pax3	0.137876
H3f3a	Ring1	0.251904		H3f3a	Ring1	0.148079		H3f3a	Ring1	0.0912643		H3f3a	Ring1	0.0993763
H3f3a	Sox1	0.449038		H3f3a	Sox1	0.31304		H3f3a	Sox1	0.249353		H3f3a	Sox1	0.128567
H3f3a	Sox3	0.0693692		H3f3a	Sox3	0.320576		H3f3a	Sox3	0.382773		H3f3a	Sox3	0.124949
H3f3a	Suz12	0.169699		H3f3a	Suz12	0.0708909		H3f3a	Suz12	0.0734621		H3f3a	Suz12	0.107604
H3f3b	Ascl1	0.177354		H3f3b	Ascl1	0.082222		H3f3b	Ascl1	0.0310382		H3f3b	Ascl1	0.115456
H3f3b	Bmi1	0.0330175		H3f3b	Bmi1	0.327933		H3f3b	Bmi1	0.262869		H3f3b	Bmi1	0.0697474
H3f3b	Eed	0.189418		H3f3b	Eed	0.30833		H3f3b	Eed	0.112091		H3f3b	Eed	0.0192599
H3f3b	Ikzf1	0.419877		H3f3b	Ikzf1	0.110349		H3f3b	Ikzf1	0.249223		H3f3b	Ikzf1	0.197785
H3f3b	Irx3	0.770514		H3f3b	Irx3	0.127189		H3f3b	Irx3	0.702836		H3f3b	Irx3	0.277731
H3f3b	Msx1	0.560215		H3f3b	Msx1	0.135392		H3f3b	Msx1	0.089401		H3f3b	Msx1	0.132261
H3f3b	Myf5	0.562053		H3f3b	Myf5	0.172308		H3f3b	Myf5	0.283556		H3f3b	Myf5	0.354352
H3f3b	Nkx2-2	0.980589		H3f3b	Nkx2-2	0.106546		H3f3b	Nkx2-2	0.0814417		H3f3b	Nkx2-2	0.205998
H3f3b	Nkx2-9	0.0963983		H3f3b	Nkx2-9	0.866155		H3f3b	Nkx2-9	0.422209		H3f3b	Nkx2-9	0.223798
H3f3b	Pax3	0.158036		H3f3b	Pax3	0.81979		H3f3b	Pax3	0.360592		H3f3b	Pax3	0.193684
H3f3b	Ring1	0.13428		H3f3b	Ring1	0.595449		H3f3b	Ring1	0.498507		H3f3b	Ring1	0.0815595
H3f3b	Sox1	0.214256		H3f3b	Sox1	0.282327		H3f3b	Sox1	0.283227		H3f3b	Sox1	0.0871088
H3f3b	Sox3	0.103545		H3f3b	Sox3	0.072406		H3f3b	Sox3	0.114629		H3f3b	Sox3	0.12469
H3f3b	Suz12	0.0450109		H3f3b	Suz12	0.535291		H3f3b	Suz12	0.226932		H3f3b	Suz12	0.0267731
Hand1	Tet1	0.0419051		Hand1	Tet1	0.100317		Hand1	Tet1	0.0202925		Hand1	Tet1	0.064765
Hcfc1	Thap11	0.0336009		Hcfc1	Thap11	0.0189195		Hcfc1	Thap11	0.0643563		Hcfc1	Thap11	0.242723
Hdac1	Ezh1	0.0496819		Hdac1	Ezh1	0.130442		Hdac1	Ezh1	0.24578		Hdac1	Ezh1	0.317753
Hdac1	Hdac2	0.0300428		Hdac1	Hdac2	0.0517653		Hdac1	Hdac2	0.0347535		Hdac1	Hdac2	0.0637487
Hdac1	Mta1	0.0164161		Hdac1	Mta1	0.0505069		Hdac1	Mta1	0.0178221		Hdac1	Mta1	0.0742749
Hdac1	Mta2	0.0884677		Hdac1	Mta2	0.268387		Hdac1	Mta2	0.13777		Hdac1	Mta2	0.158507
Hdac1	Nanog	0.359596		Hdac1	Nanog	0.199532		Hdac1	Nanog	0.711199		Hdac1	Nanog	0.164314
Hdac1	Sall4	0.0292047		Hdac1	Sall4	0.0707606		Hdac1	Sall4	0.032704		Hdac1	Sall4	0.033808
Hdac2	Mta1	0.0836177		Hdac2	Mta1	0.398399		Hdac2	Mta1	0.179996		Hdac2	Mta1	0.132005
Hdac2	Mta2	0.779936		Hdac2	Mta2	0.350882		Hdac2	Mta2	0.418895		Hdac2	Mta2	0.585971
Hdac2	Nanog	0.0486095		Hdac2	Nanog	0.0381728		Hdac2	Nanog	0.0137587		Hdac2	Nanog	0.0428214
Hes1	Gli1	0.00764136		Hes1	Gli1	0.0919806		Hes1	Gli1	0.154729		Hes1	Gli1	0.0905484
Hes1	Shh	0.0214587		Hes1	Shh	0.0941937		Hes1	Shh	0.0925618		Hes1	Shh	0.169813
Hesx1	Sox2	0.0156282		Hesx1	Sox2	0.0260083		Hesx1	Sox2	0.0390494		Hesx1	Sox2	0.246928
Hif1a	Arnt	0.133659		Hif1a	Arnt	0.112307		Hif1a	Arnt	0.0944737		Hif1a	Arnt	0.136704
Hif1a	Ep300	0.0111115		Hif1a	Ep300	0.0229554		Hif1a	Ep300	0.0371481		Hif1a	Ep300	0.0715907
Hif1a	Hdac9	0.19881		Hif1a	Hdac9	0.0409635		Hif1a	Hdac9	0.0429653		Hif1a	Hdac9	0.170673
Hif1a	Lifr	0.0237001		Hif1a	Lifr	0.0451881		Hif1a	Lifr	0.0679817		Hif1a	Lifr	0.249743
Hif1a	Pdc	0.0315813		Hif1a	Pdc	0.0453576		Hif1a	Pdc	0.072375		Hif1a	Pdc	0.151727
Hif1a	Ppp1r8	0.0547503		Hif1a	Ppp1r8	0.0477961		Hif1a	Ppp1r8	0.0471865		Hif1a	Ppp1r8	0.142197
Hif1a	Prkcd	0.0191619		Hif1a	Prkcd	0.0324265		Hif1a	Prkcd	0.0327826		Hif1a	Prkcd	0.10366
Hnf4a	Dgcr8	0.0113247		Hnf4a	Dgcr8	0.0483083		Hnf4a	Dgcr8	0.068261		Hnf4a	Dgcr8	0.0470892
Hnf4a	Eed	0.063166		Hnf4a	Eed	0.0559785		Hnf4a	Eed	0.0728375		Hnf4a	Eed	0.137864
Hras1	Fgf8	0.0172965		Hras1	Fgf8	0.0760146		Hras1	Fgf8	0.056578		Hras1	Fgf8	0.0545235
Hras1	Jak1	0.0988252		Hras1	Jak1	0.0241671		Hras1	Jak1	0.0381337		Hras1	Jak1	0.275539
Hras1	Lif	0.0239343		Hras1	Lif	0.0418306		Hras1	Lif	0.0869898		Hras1	Lif	0.208782
Hras1	Lifr	0.124235		Hras1	Lifr	0.0267995		Hras1	Lifr	0.0207492		Hras1	Lifr	0.205679
Hras1	Ptpn11	0.0190594		Hras1	Ptpn11	0.0483247		Hras1	Ptpn11	0.13066		Hras1	Ptpn11	0.213207
Hras1	Sos1	0.0397676		Hras1	Sos1	0.0118162		Hras1	Sos1	0.0207773		Hras1	Sos1	0.136161
Hrc	Sox15	0.15764		Hrc	Sox15	0.324824		Hrc	Sox15	0.393453		Hrc	Sox15	0.184198
Id1	Irs1	0.0856734		Id1	Irs1	0.00740128		Id1	Irs1	0.0782607		Id1	Irs1	0.200941
Id1	Lif	0.144308		Id1	Lif	0.1815		Id1	Lif	0.49985		Id1	Lif	0.0816166
Id2	Irs1	0.86416		Id2	Irs1	0.546366		Id2	Irs1	0.556995		Id2	Irs1	0.648619
Ikbkb	Akt1	0.47661		Ikbkb	Akt1	0.247078		Ikbkb	Akt1	0.187329		Ikbkb	Akt1	0.283194
Ikbkb	Akt3	0.856778		Ikbkb	Akt3	0.701506		Ikbkb	Akt3	0.854325		Ikbkb	Akt3	0.152695
Ikbke	Akt1	0.613446		Ikbke	Akt1	0.29294		Ikbke	Akt1	0.0915939		Ikbke	Akt1	0.132443
Ikbkg	Akt1	0.606406		Ikbkg	Akt1	0.0531132		Ikbkg	Akt1	0.0229496		Ikbkg	Akt1	0.137875
Ikbkg	Akt3	0.614128		Ikbkg	Akt3	0.0335728		Ikbkg	Akt3	0.0338501		Ikbkg	Akt3	0.0240367
Il6st	Jak1	0.0305391		Il6st	Jak1	0.154051		Il6st	Jak1	0.0267714		Il6st	Jak1	0.0550342
Il6st	Lif	0.993298		Il6st	Lif	0.193322		Il6st	Lif	0.391683		Il6st	Lif	0.446169
Il6st	Lifr	0.896564		Il6st	Lifr	0.681011		Il6st	Lifr	0.247903		Il6st	Lifr	0.0286625
Il6st	Myc	0.467444		Il6st	Myc	0.209673		Il6st	Myc	0.0907876		Il6st	Myc	0.0624178
Il6st	Ptpn11	0.311637		Il6st	Ptpn11	0.0361563		Il6st	Ptpn11	0.0309178		Il6st	Ptpn11	0.0939313
Il6st	Sos1	0.00929028		Il6st	Sos1	0.00492221		Il6st	Sos1	0.0129567		Il6st	Sos1	0.0360142
Il6st	Sox2	0.913798		Il6st	Sox2	0.740533		Il6st	Sox2	0.789721		Il6st	Sox2	0.523298
Inpp5d	Akt1	0.840641		Inpp5d	Akt1	0.934482		Inpp5d	Akt1	0.857551		Inpp5d	Akt1	0.106139
Inpp5d	Akt3	0.326563		Inpp5d	Akt3	0.0745947		Inpp5d	Akt3	0.0804411		Inpp5d	Akt3	0.0909024
Inpp5d	Pik3cd	0.839545		Inpp5d	Pik3cd	0.0698875		Inpp5d	Pik3cd	0.0585996		Inpp5d	Pik3cd	0.61458
Inpp5d	Pik3r2	0.238809		Inpp5d	Pik3r2	0.0895111		Inpp5d	Pik3r2	0.0379619		Inpp5d	Pik3r2	0.11498
Jak1	Lif	0.323921		Jak1	Lif	0.68196		Jak1	Lif	0.104385		Jak1	Lif	0.242622
Jak1	Lifr	0.282134		Jak1	Lifr	0.598099		Jak1	Lifr	0.438685		Jak1	Lifr	0.108196
Jak1	Myc	0.120966		Jak1	Myc	0.256462		Jak1	Myc	0.055215		Jak1	Myc	0.119111
Jak1	Ptpn11	0.945661		Jak1	Ptpn11	0.0387731		Jak1	Ptpn11	0.0314623		Jak1	Ptpn11	0.338011
Jak1	Raf1	0.0621405		Jak1	Raf1	0.198557		Jak1	Raf1	0.275526		Jak1	Raf1	0.270394
Jak1	Sos1	0.663962		Jak1	Sos1	0.579517		Jak1	Sos1	0.475245		Jak1	Sos1	0.888989
Jak1	Sox2	0.0214052		Jak1	Sox2	0.062699		Jak1	Sox2	0.048451		Jak1	Sox2	0.167456
Jun	Fgf8	0.202946		Jun	Fgf8	0.150868		Jun	Fgf8	0.194041		Jun	Fgf8	0.0780573
Jun	Lif	0.105984		Jun	Lif	0.076702		Jun	Lif	0.0339691		Jun	Lif	0.10555
Jun	Lifr	0.115151		Jun	Lifr	0.0891424		Jun	Lifr	0.0864007		Jun	Lifr	0.130224
Jun	Ptpn11	0.609106		Jun	Ptpn11	0.937251		Jun	Ptpn11	0.761301		Jun	Ptpn11	0.405603
Jun	Raf1	0.707182		Jun	Raf1	0.543107		Jun	Raf1	0.478687		Jun	Raf1	0.334521
Jun	Sos1	0.45338		Jun	Sos1	0.389469		Jun	Sos1	0.271671		Jun	Sos1	0.203427
Kdm1a	Nanog	0.8762		Kdm1a	Nanog	0.609209		Kdm1a	Nanog	0.238594		Kdm1a	Nanog	0.136812
Klf4	Esrrb	0.830588		Klf4	Esrrb	0.997592		Klf4	Esrrb	0.998304		Klf4	Esrrb	0.449064
Klf4	Il6st	0.897254		Klf4	Il6st	0.89952		Klf4	Il6st	0.880718		Klf4	Il6st	0.0787339
Klf4	Lif	0.106284		Klf4	Lif	0.303701		Klf4	Lif	0.218157		Klf4	Lif	0.0905054
Klf4	Lifr	0.743749		Klf4	Lifr	0.201735		Klf4	Lifr	0.337443		Klf4	Lifr	0.136555
Klf4	Nanog	0.735226		Klf4	Nanog	0.439482		Klf4	Nanog	0.768594		Klf4	Nanog	0.286196
Klf4	Smad4	0.219662		Klf4	Smad4	0.921279		Klf4	Smad4	0.715265		Klf4	Smad4	0.0693175
Klf4	Smad9	0.83386		Klf4	Smad9	0.753912		Klf4	Smad9	0.382462		Klf4	Smad9	0.292015
Klf4	Sox2	0.894073		Klf4	Sox2	0.0609987		Klf4	Sox2	0.454291		Klf4	Sox2	0.385123
Klf4	Zfp281	0.999999		Klf4	Zfp281	0.996779		Klf4	Zfp281	0.986866		Klf4	Zfp281	0.777999
Klf5	Cdx2	0.128019		Klf5	Cdx2	0.281121		Klf5	Cdx2	0.121189		Klf5	Cdx2	0.173291
Klf5	Fgf5	0.928007		Klf5	Fgf5	0.605657		Klf5	Fgf5	0.376282		Klf5	Fgf5	0.417396
Klf5	Il6st	0.980375		Klf5	Il6st	0.848487		Klf5	Il6st	0.831502		Klf5	Il6st	0.138779
Klf5	Lif	0.0820368		Klf5	Lif	0.196496		Klf5	Lif	0.0902758		Klf5	Lif	0.449902
Klf5	Lifr	0.00543248		Klf5	Lifr	0.0904489		Klf5	Lifr	0.0982622		Klf5	Lifr	0.0411835
Klf5	Nanog	0.0664612		Klf5	Nanog	0.17702		Klf5	Nanog	0.0474642		Klf5	Nanog	0.322826
Klf5	T	0.0327641		Klf5	T	0.370023		Klf5	T	0.097616		Klf5	T	0.0499806
Klk1	Esrrb	0.136793		Klk1	Esrrb	0.106811		Klk1	Esrrb	0.0426204		Klk1	Esrrb	0.0378171
Lefty1	Klf4	0.914361		Lefty1	Klf4	0.664134		Lefty1	Klf4	0.470287		Lefty1	Klf4	0.245237
Lefty1	Sox11	0.0461203		Lefty1	Sox11	0.0553937		Lefty1	Sox11	0.0647687		Lefty1	Sox11	0.128202
Lefty1	Sox15	0.886429		Lefty1	Sox15	0.671338		Lefty1	Sox15	0.30971		Lefty1	Sox15	0.152202
Lefty1	Sox2	0.625318		Lefty1	Sox2	0.701794		Lefty1	Sox2	0.338184		Lefty1	Sox2	0.0765262
Lefty2	Sox2	0.012294		Lefty2	Sox2	0.0766373		Lefty2	Sox2	0.0506815		Lefty2	Sox2	0.0610254
Lif	Irs1	0.0640753		Lif	Irs1	0.1302		Lif	Irs1	0.120537		Lif	Irs1	0.0559211
Lif	Kdm3a	0.0610093		Lif	Kdm3a	0.222671		Lif	Kdm3a	0.218048		Lif	Kdm3a	0.0570441
Lif	Lifr	0.00841893		Lif	Lifr	0.0335275		Lif	Lifr	0.0310373		Lif	Lifr	0.137409
Lif	Myc	0.955162		Lif	Myc	0.333563		Lif	Myc	0.0806902		Lif	Myc	0.202573
Lif	Pim1	0.0281276		Lif	Pim1	0.316893		Lif	Pim1	0.0683904		Lif	Pim1	0.127061
Lif	Ptpn11	0.742955		Lif	Ptpn11	0.126321		Lif	Ptpn11	0.158853		Lif	Ptpn11	0.138292
Lif	Raf1	0.904872		Lif	Raf1	0.910458		Lif	Raf1	0.613855		Lif	Raf1	0.169828
Lif	Sos1	0.296385		Lif	Sos1	0.594559		Lif	Sos1	0.477025		Lif	Sos1	0.0686469
Lif	Sox2	0.315288		Lif	Sox2	0.0249054		Lif	Sox2	0.0661138		Lif	Sox2	0.134487
Lif	Zfp42	0.376317		Lif	Zfp42	0.0157048		Lif	Zfp42	0.0235504		Lif	Zfp42	0.123635
Lifr	Prkcd	0.999433		Lifr	Prkcd	0.640855		Lifr	Prkcd	0.74928		Lifr	Prkcd	0.612134
Lifr	Ptpn11	0.688302		Lifr	Ptpn11	0.779977		Lifr	Ptpn11	0.777637		Lifr	Ptpn11	0.0332435
Lifr	Raf1	0.133359		Lifr	Raf1	0.0322445		Lifr	Raf1	0.0473058		Lifr	Raf1	0.203744
Lifr	Sos1	0.862333		Lifr	Sos1	0.78195		Lifr	Sos1	0.832034		Lifr	Sos1	0.274727
Lin28a	Myc	0.323949		Lin28a	Myc	0.137839		Lin28a	Myc	0.144984		Lin28a	Myc	0.320003
Lin28a	Mycn	0.573813		Lin28a	Mycn	0.256524		Lin28a	Mycn	0.0649623		Lin28a	Mycn	0.0581201
Lin28a	Nanog	0.0959639		Lin28a	Nanog	0.424467		Lin28a	Nanog	0.224869		Lin28a	Nanog	0.408848
Lin28a	Sox2	0.787802		Lin28a	Sox2	0.272348		Lin28a	Sox2	0.280946		Lin28a	Sox2	0.214897
Lin28a	Tcf3	0.0990582		Lin28a	Tcf3	0.0358307		Lin28a	Tcf3	0.0461679		Lin28a	Tcf3	0.224749
Lin28a	Zcchc11	0.399482		Lin28a	Zcchc11	0.692087		Lin28a	Zcchc11	0.357415		Lin28a	Zcchc11	0.0768225
Lrp5	Dvl1	0.999498		Lrp5	Dvl1	0.976212		Lrp5	Dvl1	0.96444		Lrp5	Dvl1	0.502104
Lrp5	Fzd2	0.398909		Lrp5	Fzd2	0.307407		Lrp5	Fzd2	0.230284		Lrp5	Fzd2	0.138123
Lrp5	Fzd9	0.724347		Lrp5	Fzd9	0.13875		Lrp5	Fzd9	0.0436672		Lrp5	Fzd9	0.397261
Lrp6	Dvl1	0.991882		Lrp6	Dvl1	0.564598		Lrp6	Dvl1	0.816248		Lrp6	Dvl1	0.200552
Lrp6	Fzd2	0.905617		Lrp6	Fzd2	0.835135		Lrp6	Fzd2	0.890849		Lrp6	Fzd2	0.109947
Lrp6	Fzd9	0.126406		Lrp6	Fzd9	0.109835		Lrp6	Fzd9	0.157074		Lrp6	Fzd9	0.148945
Lyar	Cdx2	0.69271		Lyar	Cdx2	0.32551		Lyar	Cdx2	0.103181		Lyar	Cdx2	0.252081
Lyar	Fgf5	0.488953		Lyar	Fgf5	0.170808		Lyar	Fgf5	0.172221		Lyar	Fgf5	0.347907
Lyar	Gata6	0.892766		Lyar	Gata6	0.154067		Lyar	Gata6	0.192909		Lyar	Gata6	0.236959
Lyar	Ncl	0.999896		Lyar	Ncl	0.910344		Lyar	Ncl	0.948464		Lyar	Ncl	0.109864
Lyar	T	0.261371		Lyar	T	0.408934		Lyar	T	0.193313		Lyar	T	0.225603
Map2k1	Araf	0.999394		Map2k1	Araf	0.161723		Map2k1	Araf	0.140663		Map2k1	Araf	0.28726
Map2k1	Braf	0.932079		Map2k1	Braf	0.467808		Map2k1	Braf	0.537001		Map2k1	Braf	0.286954
Map2k1	Egf	0.261389		Map2k1	Egf	0.129649		Map2k1	Egf	0.103218		Map2k1	Egf	0.183832
Map2k1	Egfr	0.113387		Map2k1	Egfr	0.0552963		Map2k1	Egfr	0.0397189		Map2k1	Egfr	0.309535
Map2k1	Fgf1	0.850412		Map2k1	Fgf1	0.55465		Map2k1	Fgf1	0.585247		Map2k1	Fgf1	0.167106
Map2k1	Fgf16	0.612798		Map2k1	Fgf16	0.0211562		Map2k1	Fgf16	0.0321725		Map2k1	Fgf16	0.204276
Map2k1	Fgf2	0.303218		Map2k1	Fgf2	0.587036		Map2k1	Fgf2	0.789244		Map2k1	Fgf2	0.083347
Map2k1	Fgf20	0.465089		Map2k1	Fgf20	0.270647		Map2k1	Fgf20	0.228501		Map2k1	Fgf20	0.0944099
Map2k1	Fgf21	0.0183128		Map2k1	Fgf21	0.0280565		Map2k1	Fgf21	0.0365533		Map2k1	Fgf21	0.122038
Map2k1	Fgf22	0.480244		Map2k1	Fgf22	0.166118		Map2k1	Fgf22	0.122994		Map2k1	Fgf22	0.0499035
Map2k1	Fgf23	0.101868		Map2k1	Fgf23	0.0624893		Map2k1	Fgf23	0.0446295		Map2k1	Fgf23	0.0511653
Map2k1	Fgf3	0.222723		Map2k1	Fgf3	0.0107622		Map2k1	Fgf3	0.0338857		Map2k1	Fgf3	0.146587
Map2k1	Fgf4	0.101898		Map2k1	Fgf4	0.506066		Map2k1	Fgf4	0.507539		Map2k1	Fgf4	0.0879624
Map2k1	Fgf5	0.0334851		Map2k1	Fgf5	0.0379684		Map2k1	Fgf5	0.0496887		Map2k1	Fgf5	0.126253
Map2k1	Fgf6	0.174602		Map2k1	Fgf6	0.134229		Map2k1	Fgf6	0.225097		Map2k1	Fgf6	0.121252
Map2k1	Fgf7	0.125286		Map2k1	Fgf7	0.248076		Map2k1	Fgf7	0.372629		Map2k1	Fgf7	0.22354
Map2k1	Fgf8	0.74007		Map2k1	Fgf8	0.652047		Map2k1	Fgf8	0.590151		Map2k1	Fgf8	0.0570657
Map2k1	Fgfr1	0.71105		Map2k1	Fgfr1	0.613803		Map2k1	Fgfr1	0.512666		Map2k1	Fgfr1	0.146891
Map2k1	Fgfr2	0.0937444		Map2k1	Fgfr2	0.195598		Map2k1	Fgfr2	0.285356		Map2k1	Fgfr2	0.269893
Map2k1	Fgfr3	0.426847		Map2k1	Fgfr3	0.596093		Map2k1	Fgfr3	0.367255		Map2k1	Fgfr3	0.240201
Map2k1	Fgfr4	0.0493229		Map2k1	Fgfr4	0.317827		Map2k1	Fgfr4	0.537488		Map2k1	Fgfr4	0.158985
Map2k1	Fos	0.0518858		Map2k1	Fos	0.128178		Map2k1	Fos	0.30962		Map2k1	Fos	0.330161
Map2k1	Jun	0.37502		Map2k1	Jun	0.278621		Map2k1	Jun	0.26287		Map2k1	Jun	0.0515561
Map2k1	Lif	0.0757783		Map2k1	Lif	0.366795		Map2k1	Lif	0.434414		Map2k1	Lif	0.102764
Map2k1	Lifr	0.172511		Map2k1	Lifr	0.0522032		Map2k1	Lifr	0.104181		Map2k1	Lifr	0.0248158
Map2k1	Mapk12	0.0371887		Map2k1	Mapk12	0.0113732		Map2k1	Mapk12	0.0136874		Map2k1	Mapk12	0.175344
Map2k1	Mapk4	0.306511		Map2k1	Mapk4	0.245077		Map2k1	Mapk4	0.369261		Map2k1	Mapk4	0.286735
Map2k1	Mapk6	0.134004		Map2k1	Mapk6	0.0370133		Map2k1	Mapk6	0.0812595		Map2k1	Mapk6	0.0967501
Map2k1	Ptpn11	0.115268		Map2k1	Ptpn11	0.170426		Map2k1	Ptpn11	0.0634129		Map2k1	Ptpn11	0.126247
Map2k1	Raf1	0.0300962		Map2k1	Raf1	0.0428981		Map2k1	Raf1	0.126827		Map2k1	Raf1	0.120548
Map2k1	Sos1	0.208149		Map2k1	Sos1	0.335862		Map2k1	Sos1	0.229836		Map2k1	Sos1	0.19232
Map2k2	Araf	0.326907		Map2k2	Araf	0.14656		Map2k2	Araf	0.106099		Map2k2	Araf	0.223003
Map2k2	Braf	0.13611		Map2k2	Braf	0.168777		Map2k2	Braf	0.105813		Map2k2	Braf	0.273505
Map2k2	Egf	0.852117		Map2k2	Egf	0.889472		Map2k2	Egf	0.972283		Map2k2	Egf	0.493657
Map2k2	Egfr	0.187548		Map2k2	Egfr	0.24887		Map2k2	Egfr	0.346575		Map2k2	Egfr	0.254614
Map2k2	Fgf1	0.042193		Map2k2	Fgf1	0.103713		Map2k2	Fgf1	0.0835325		Map2k2	Fgf1	0.116514
Map2k2	Fgf16	0.045341		Map2k2	Fgf16	0.098186		Map2k2	Fgf16	0.116963		Map2k2	Fgf16	0.265683
Map2k2	Fgf2	0.0588306		Map2k2	Fgf2	0.0803435		Map2k2	Fgf2	0.0905021		Map2k2	Fgf2	0.245663
Map2k2	Fgf20	0.0684659		Map2k2	Fgf20	0.160045		Map2k2	Fgf20	0.196134		Map2k2	Fgf20	0.271698
Map2k2	Fgf21	0.318845		Map2k2	Fgf21	0.637151		Map2k2	Fgf21	0.783456		Map2k2	Fgf21	0.162296
Map2k2	Fgf22	0.629328		Map2k2	Fgf22	0.455565		Map2k2	Fgf22	0.156508		Map2k2	Fgf22	0.227264
Map2k2	Fgf23	0.617644		Map2k2	Fgf23	0.863936		Map2k2	Fgf23	0.752307		Map2k2	Fgf23	0.124317
Map2k2	Fgf3	0.0178212		Map2k2	Fgf3	0.0121251		Map2k2	Fgf3	0.0428917		Map2k2	Fgf3	0.126868
Map2k2	Fgf4	0.0128493		Map2k2	Fgf4	0.0731952		Map2k2	Fgf4	0.054437		Map2k2	Fgf4	0.099696
Map2k2	Fgf5	0.087372		Map2k2	Fgf5	0.133478		Map2k2	Fgf5	0.101742		Map2k2	Fgf5	0.129881
Map2k2	Fgf6	0.66098		Map2k2	Fgf6	0.290517		Map2k2	Fgf6	0.601705		Map2k2	Fgf6	0.0966012
Map2k2	Fgf7	0.476854		Map2k2	Fgf7	0.360517		Map2k2	Fgf7	0.501972		Map2k2	Fgf7	0.162243
Map2k2	Fgf8	0.111461		Map2k2	Fgf8	0.237646		Map2k2	Fgf8	0.273896		Map2k2	Fgf8	0.284881
Map2k2	Fgfr1	0.0132372		Map2k2	Fgfr1	0.0141785		Map2k2	Fgfr1	0.010344		Map2k2	Fgfr1	0.0161846
Map2k2	Fgfr2	0.148941		Map2k2	Fgfr2	0.0408418		Map2k2	Fgfr2	0.0442906		Map2k2	Fgfr2	0.0371214
Map2k2	Fgfr3	0.0354304		Map2k2	Fgfr3	0.493664		Map2k2	Fgfr3	0.204505		Map2k2	Fgfr3	0.152975
Map2k2	Fgfr4	0.342623		Map2k2	Fgfr4	0.428319		Map2k2	Fgfr4	0.40567		Map2k2	Fgfr4	0.0269594
Map2k2	Fos	0.0128216		Map2k2	Fos	0.00903041		Map2k2	Fos	0.0038424		Map2k2	Fos	0.133259
Map2k2	Jun	0.457375		Map2k2	Jun	0.575291		Map2k2	Jun	0.610144		Map2k2	Jun	0.112399
Map2k2	Lif	0.161417		Map2k2	Lif	0.349833		Map2k2	Lif	0.242174		Map2k2	Lif	0.105744
Map2k2	Lifr	0.0826615		Map2k2	Lifr	0.209693		Map2k2	Lifr	0.0520102		Map2k2	Lifr	0.0901721
Map2k2	Mapk12	0.011322		Map2k2	Mapk12	0.144207		Map2k2	Mapk12	0.0435159		Map2k2	Mapk12	0.0414529
Map2k2	Mapk4	0.16321		Map2k2	Mapk4	0.190265		Map2k2	Mapk4	0.275072		Map2k2	Mapk4	0.237525
Map2k2	Mapk6	0.331101		Map2k2	Mapk6	0.571047		Map2k2	Mapk6	0.356063		Map2k2	Mapk6	0.0785068
Map2k2	Ptpn11	0.0741868		Map2k2	Ptpn11	0.528824		Map2k2	Ptpn11	0.207464		Map2k2	Ptpn11	0.297747
Map2k2	Raf1	0.109064		Map2k2	Raf1	0.0646362		Map2k2	Raf1	0.0785421		Map2k2	Raf1	0.704983
Map2k2	Sos1	0.0347318		Map2k2	Sos1	0.470757		Map2k2	Sos1	0.265589		Map2k2	Sos1	0.113821
Map2k3	Araf	0.750234		Map2k3	Araf	0.203835		Map2k3	Araf	0.150408		Map2k3	Araf	0.154414
Map2k3	Braf	0.392614		Map2k3	Braf	0.222876		Map2k3	Braf	0.0912938		Map2k3	Braf	0.176326
Map2k3	Egf	0.0568967		Map2k3	Egf	0.050196		Map2k3	Egf	0.11306		Map2k3	Egf	0.116004
Map2k3	Egfr	0.333922		Map2k3	Egfr	0.127491		Map2k3	Egfr	0.349789		Map2k3	Egfr	0.161254
Map2k3	Fgf1	0.0177221		Map2k3	Fgf1	0.258925		Map2k3	Fgf1	0.0798495		Map2k3	Fgf1	0.0260384
Map2k3	Fgf16	0.0308496		Map2k3	Fgf16	0.127318		Map2k3	Fgf16	0.204375		Map2k3	Fgf16	0.0751168
Map2k3	Fgf2	0.0176777		Map2k3	Fgf2	0.0481598		Map2k3	Fgf2	0.0188237		Map2k3	Fgf2	0.171035
Map2k3	Fgf20	0.584541		Map2k3	Fgf20	0.0280321		Map2k3	Fgf20	0.0291291		Map2k3	Fgf20	0.0448948
Map2k3	Fgf21	0.0106893		Map2k3	Fgf21	0.0289421		Map2k3	Fgf21	0.0301844		Map2k3	Fgf21	0.135878
Map2k3	Fgf22	0.0106593		Map2k3	Fgf22	0.0638592		Map2k3	Fgf22	0.0494512		Map2k3	Fgf22	0.116541
Map2k3	Fgf23	0.120431		Map2k3	Fgf23	0.0752937		Map2k3	Fgf23	0.0737535		Map2k3	Fgf23	0.085637
Map2k3	Fgf3	0.00956204		Map2k3	Fgf3	0.12069		Map2k3	Fgf3	0.0947574		Map2k3	Fgf3	0.0928833
Map2k3	Fgf4	0.0326307		Map2k3	Fgf4	0.126696		Map2k3	Fgf4	0.0738589		Map2k3	Fgf4	0.0899911
Map2k3	Fgf5	0.590342		Map2k3	Fgf5	0.182865		Map2k3	Fgf5	0.460249		Map2k3	Fgf5	0.175012
Map2k3	Fgf6	0.0296961		Map2k3	Fgf6	0.301461		Map2k3	Fgf6	0.203897		Map2k3	Fgf6	0.115244
Map2k3	Fgf7	0.471712		Map2k3	Fgf7	0.391579		Map2k3	Fgf7	0.278425		Map2k3	Fgf7	0.0954113
Map2k3	Fgf8	0.0177697		Map2k3	Fgf8	0.03557		Map2k3	Fgf8	0.0431037		Map2k3	Fgf8	0.273741
Map2k3	Fgfr1	0.0339905		Map2k3	Fgfr1	0.0491852		Map2k3	Fgfr1	0.0694737		Map2k3	Fgfr1	0.139748
Map2k3	Fgfr2	0.0145105		Map2k3	Fgfr2	0.0491852		Map2k3	Fgfr2	0.0694737		Map2k3	Fgfr2	0.104009
Map2k3	Fgfr3	0.0174702		Map2k3	Fgfr3	0.0304134		Map2k3	Fgfr3	0.0398983		Map2k3	Fgfr3	0.17481
Map2k3	Fgfr4	0.0276852		Map2k3	Fgfr4	0.0669623		Map2k3	Fgfr4	0.0641372		Map2k3	Fgfr4	0.170482
Map2k3	Fos	0.187676		Map2k3	Fos	0.0515817		Map2k3	Fos	0.0157203		Map2k3	Fos	0.28699
Map2k3	Jun	0.0360591		Map2k3	Jun	0.0719704		Map2k3	Jun	0.0439999		Map2k3	Jun	0.0729105
Map2k3	Lif	0.267752		Map2k3	Lif	0.192217		Map2k3	Lif	0.0576794		Map2k3	Lif	0.0306909
Map2k3	Lifr	0.0766776		Map2k3	Lifr	0.0293841		Map2k3	Lifr	0.0259173		Map2k3	Lifr	0.0955268
Map2k3	Mapk12	0.0133525		Map2k3	Mapk12	0.116271		Map2k3	Mapk12	0.0873845		Map2k3	Mapk12	0.0756725
Map2k3	Mapk4	0.00922388		Map2k3	Mapk4	0.0409209		Map2k3	Mapk4	0.0443761		Map2k3	Mapk4	0.0094593
Map2k3	Mapk6	0.0354702		Map2k3	Mapk6	0.14324		Map2k3	Mapk6	0.0704851		Map2k3	Mapk6	0.114967
Map2k3	Ptpn11	0.0148727		Map2k3	Ptpn11	0.0492636		Map2k3	Ptpn11	0.0443932		Map2k3	Ptpn11	0.175824
Map2k3	Raf1	0.00953768		Map2k3	Raf1	0.0818348		Map2k3	Raf1	0.0448316		Map2k3	Raf1	0.227962
Map2k3	Sos1	0.060122		Map2k3	Sos1	0.107195		Map2k3	Sos1	0.0665158		Map2k3	Sos1	0.0747836
Map2k5	Araf	0.0807598		Map2k5	Araf	0.426466		Map2k5	Araf	0.45644		Map2k5	Araf	0.0511173
Map2k5	Braf	0.01266		Map2k5	Braf	0.0130805		Map2k5	Braf	0.0327036		Map2k5	Braf	0.0779273
Map2k5	Egf	0.0260722		Map2k5	Egf	0.232625		Map2k5	Egf	0.180196		Map2k5	Egf	0.084562
Map2k5	Egfr	0.10318		Map2k5	Egfr	0.101098		Map2k5	Egfr	0.0743387		Map2k5	Egfr	0.170957
Map2k5	Fgf1	0.48309		Map2k5	Fgf1	0.118151		Map2k5	Fgf1	0.115377		Map2k5	Fgf1	0.118981
Map2k5	Fgf16	0.00899029		Map2k5	Fgf16	0.137822		Map2k5	Fgf16	0.128617		Map2k5	Fgf16	0.0741832
Map2k5	Fgf2	0.0611975		Map2k5	Fgf2	0.307301		Map2k5	Fgf2	0.16812		Map2k5	Fgf2	0.11658
Map2k5	Fgf20	0.304891		Map2k5	Fgf20	0.20757		Map2k5	Fgf20	0.0673051		Map2k5	Fgf20	0.18185
Map2k5	Fgf21	0.131634		Map2k5	Fgf21	0.363581		Map2k5	Fgf21	0.293377		Map2k5	Fgf21	0.197109
Map2k5	Fgf22	0.776932		Map2k5	Fgf22	0.741595		Map2k5	Fgf22	0.195263		Map2k5	Fgf22	0.0841088
Map2k5	Fgf23	0.645109		Map2k5	Fgf23	0.739837		Map2k5	Fgf23	0.0562125		Map2k5	Fgf23	0.514238
Map2k5	Fgf3	0.0197087		Map2k5	Fgf3	0.0807983		Map2k5	Fgf3	0.0364903		Map2k5	Fgf3	0.215742
Map2k5	Fgf4	0.0601595		Map2k5	Fgf4	0.0847696		Map2k5	Fgf4	0.0400743		Map2k5	Fgf4	0.0715238
Map2k5	Fgf5	0.0495112		Map2k5	Fgf5	0.174322		Map2k5	Fgf5	0.0929047		Map2k5	Fgf5	0.139392
Map2k5	Fgf6	0.0355436		Map2k5	Fgf6	0.136986		Map2k5	Fgf6	0.147307		Map2k5	Fgf6	0.0879174
Map2k5	Fgf7	0.0102292		Map2k5	Fgf7	0.045181		Map2k5	Fgf7	0.0322771		Map2k5	Fgf7	0.0704251
Map2k5	Fgf8	0.186993		Map2k5	Fgf8	0.796541		Map2k5	Fgf8	0.567192		Map2k5	Fgf8	0.0646955
Map2k5	Fgfr1	0.0793295		Map2k5	Fgfr1	0.410508		Map2k5	Fgfr1	0.0968226		Map2k5	Fgfr1	0.230146
Map2k5	Fgfr2	0.0937992		Map2k5	Fgfr2	0.183937		Map2k5	Fgfr2	0.0399326		Map2k5	Fgfr2	0.0250169
Map2k5	Fgfr3	0.476559		Map2k5	Fgfr3	0.288023		Map2k5	Fgfr3	0.178205		Map2k5	Fgfr3	0.166789
Map2k5	Fgfr4	0.0769042		Map2k5	Fgfr4	0.0420837		Map2k5	Fgfr4	0.0210799		Map2k5	Fgfr4	0.18036
Map2k5	Fos	0.0371454		Map2k5	Fos	0.0506968		Map2k5	Fos	0.110778		Map2k5	Fos	0.0637996
Map2k5	Jun	0.021696		Map2k5	Jun	0.0179012		Map2k5	Jun	0.017013		Map2k5	Jun	0.0908101
Map2k5	Lif	0.0312612		Map2k5	Lif	0.0703086		Map2k5	Lif	0.0545303		Map2k5	Lif	0.121276
Map2k5	Lifr	0.030651		Map2k5	Lifr	0.0555404		Map2k5	Lifr	0.0440979		Map2k5	Lifr	0.124294
Map2k5	Mapk1	0.58082		Map2k5	Mapk1	0.841682		Map2k5	Mapk1	0.305087		Map2k5	Mapk1	0.542526
Map2k5	Mapk12	0.794325		Map2k5	Mapk12	0.453238		Map2k5	Mapk12	0.196174		Map2k5	Mapk12	0.116701
Map2k5	Mapk4	0.0609468		Map2k5	Mapk4	0.284176		Map2k5	Mapk4	0.309849		Map2k5	Mapk4	0.0421461
Map2k5	Mapk6	0.0198247		Map2k5	Mapk6	0.20109		Map2k5	Mapk6	0.112152		Map2k5	Mapk6	0.0285691
Map2k5	Mapk7	0.189591		Map2k5	Mapk7	0.0408776		Map2k5	Mapk7	0.0399905		Map2k5	Mapk7	0.25328
Map2k5	Ptpn11	0.0209704		Map2k5	Ptpn11	0.108828		Map2k5	Ptpn11	0.104435		Map2k5	Ptpn11	0.0821958
Map2k5	Raf1	0.0124501		Map2k5	Raf1	0.0642676		Map2k5	Raf1	0.0851432		Map2k5	Raf1	0.124762
Map2k5	Sos1	0.647504		Map2k5	Sos1	0.374251		Map2k5	Sos1	0.392852		Map2k5	Sos1	0.32998
Map2k6	Araf	0.71684		Map2k6	Araf	0.235389		Map2k6	Araf	0.420214		Map2k6	Araf	0.0256606
Map2k6	Braf	0.0270547		Map2k6	Braf	0.0205933		Map2k6	Braf	0.0201476		Map2k6	Braf	0.136975
Map2k6	Egf	0.050304		Map2k6	Egf	0.0451379		Map2k6	Egf	0.0679718		Map2k6	Egf	0.0683533
Map2k6	Egfr	0.925684		Map2k6	Egfr	0.280916		Map2k6	Egfr	0.228973		Map2k6	Egfr	0.0672532
Map2k6	Fgf1	0.0502598		Map2k6	Fgf1	0.0520681		Map2k6	Fgf1	0.0628683		Map2k6	Fgf1	0.118169
Map2k6	Fgf16	0.0745005		Map2k6	Fgf16	0.120427		Map2k6	Fgf16	0.0931096		Map2k6	Fgf16	0.0691054
Map2k6	Fgf2	0.0923093		Map2k6	Fgf2	0.207252		Map2k6	Fgf2	0.124746		Map2k6	Fgf2	0.0473725
Map2k6	Fgf20	0.0599881		Map2k6	Fgf20	0.115616		Map2k6	Fgf20	0.0892794		Map2k6	Fgf20	0.111673
Map2k6	Fgf21	0.0149945		Map2k6	Fgf21	0.0708095		Map2k6	Fgf21	0.052628		Map2k6	Fgf21	0.0642512
Map2k6	Fgf22	0.0189023		Map2k6	Fgf22	0.0263648		Map2k6	Fgf22	0.0276738		Map2k6	Fgf22	0.163658
Map2k6	Fgf23	0.107643		Map2k6	Fgf23	0.0822269		Map2k6	Fgf23	0.114503		Map2k6	Fgf23	0.0937995
Map2k6	Fgf3	0.171021		Map2k6	Fgf3	0.123026		Map2k6	Fgf3	0.148403		Map2k6	Fgf3	0.0732196
Map2k6	Fgf4	0.0627046		Map2k6	Fgf4	0.047061		Map2k6	Fgf4	0.107289		Map2k6	Fgf4	0.0540002
Map2k6	Fgf5	0.011899		Map2k6	Fgf5	0.0433055		Map2k6	Fgf5	0.0533021		Map2k6	Fgf5	0.0427117
Map2k6	Fgf6	0.0127041		Map2k6	Fgf6	0.0666081		Map2k6	Fgf6	0.047603		Map2k6	Fgf6	0.0710515
Map2k6	Fgf7	0.0175212		Map2k6	Fgf7	0.0414705		Map2k6	Fgf7	0.0394599		Map2k6	Fgf7	0.134157
Map2k6	Fgf8	0.00436368		Map2k6	Fgf8	0.039236		Map2k6	Fgf8	0.0310421		Map2k6	Fgf8	0.208821
Map2k6	Fgfr1	0.131472		Map2k6	Fgfr1	0.980974		Map2k6	Fgfr1	0.826769		Map2k6	Fgfr1	0.0728245
Map2k6	Fgfr2	0.590912		Map2k6	Fgfr2	0.582054		Map2k6	Fgfr2	0.737755		Map2k6	Fgfr2	0.13666
Map2k6	Fgfr3	0.14706		Map2k6	Fgfr3	0.337875		Map2k6	Fgfr3	0.317733		Map2k6	Fgfr3	0.128695
Map2k6	Fgfr4	0.0752364		Map2k6	Fgfr4	0.374637		Map2k6	Fgfr4	0.152168		Map2k6	Fgfr4	0.37613
Map2k6	Fos	0.140068		Map2k6	Fos	0.045512		Map2k6	Fos	0.0257131		Map2k6	Fos	0.207975
Map2k6	Jun	0.0339301		Map2k6	Jun	0.0315562		Map2k6	Jun	0.0657678		Map2k6	Jun	0.094107
Map2k6	Lif	0.750055		Map2k6	Lif	0.409857		Map2k6	Lif	0.632243		Map2k6	Lif	0.0890626
Map2k6	Lifr	0.113925		Map2k6	Lifr	0.18153		Map2k6	Lifr	0.14054		Map2k6	Lifr	0.00904445
Map2k6	Mapk12	0.0626181		Map2k6	Mapk12	0.0518232		Map2k6	Mapk12	0.0804122		Map2k6	Mapk12	0.236288
Map2k6	Mapk4	0.142259		Map2k6	Mapk4	0.388423		Map2k6	Mapk4	0.0938998		Map2k6	Mapk4	0.0810009
Map2k6	Mapk6	0.330517		Map2k6	Mapk6	0.160479		Map2k6	Mapk6	0.0974295		Map2k6	Mapk6	0.0837338
Map2k6	Ptpn11	0.0707448		Map2k6	Ptpn11	0.0538676		Map2k6	Ptpn11	0.0584603		Map2k6	Ptpn11	0.0337708
Map2k6	Raf1	0.069872		Map2k6	Raf1	0.0516972		Map2k6	Raf1	0.0813007		Map2k6	Raf1	0.264217
Map2k6	Sos1	0.999874		Map2k6	Sos1	0.986682		Map2k6	Sos1	0.985686		Map2k6	Sos1	0.686362
Mapk1	Akt1	0.94305		Mapk1	Akt1	0.0570478		Mapk1	Akt1	0.0227575		Mapk1	Akt1	0.160424
Mapk1	Araf	0.792459		Mapk1	Araf	0.0735949		Mapk1	Araf	0.0189746		Mapk1	Araf	0.303614
Mapk1	Bmp4	0.225855		Mapk1	Bmp4	0.385519		Mapk1	Bmp4	0.466613		Mapk1	Bmp4	0.16093
Mapk1	Braf	0.0192566		Mapk1	Braf	0.0485216		Mapk1	Braf	0.0358422		Mapk1	Braf	0.0768942
Mapk1	Dusp6	0.705091		Mapk1	Dusp6	0.441684		Mapk1	Dusp6	0.876193		Mapk1	Dusp6	0.110798
Mapk1	Egf	0.496016		Mapk1	Egf	0.345737		Mapk1	Egf	0.143242		Mapk1	Egf	0.0907367
Mapk1	Egfr	0.969853		Mapk1	Egfr	0.985779		Mapk1	Egfr	0.21705		Mapk1	Egfr	0.391197
Mapk1	Fgf1	0.994723		Mapk1	Fgf1	0.969576		Mapk1	Fgf1	0.961696		Mapk1	Fgf1	0.375276
Mapk1	Fgf16	0.148928		Mapk1	Fgf16	0.529659		Mapk1	Fgf16	0.443644		Mapk1	Fgf16	0.175859
Mapk1	Fgf2	0.134827		Mapk1	Fgf2	0.559184		Mapk1	Fgf2	0.316539		Mapk1	Fgf2	0.200592
Mapk1	Fgf20	0.0311238		Mapk1	Fgf20	0.457192		Mapk1	Fgf20	0.51882		Mapk1	Fgf20	0.0325027
Mapk1	Fgf21	0.156021		Mapk1	Fgf21	0.442607		Mapk1	Fgf21	0.454011		Mapk1	Fgf21	0.270529
Mapk1	Fgf22	0.304738		Mapk1	Fgf22	0.0387411		Mapk1	Fgf22	0.0832676		Mapk1	Fgf22	0.458012
Mapk1	Fgf23	0.023822		Mapk1	Fgf23	0.0976335		Mapk1	Fgf23	0.118616		Mapk1	Fgf23	0.0741371
Mapk1	Fgf3	0.184629		Mapk1	Fgf3	0.233475		Mapk1	Fgf3	0.0828969		Mapk1	Fgf3	0.100897
Mapk1	Fgf4	0.0463647		Mapk1	Fgf4	0.132685		Mapk1	Fgf4	0.196623		Mapk1	Fgf4	0.0775919
Mapk1	Fgf5	0.125411		Mapk1	Fgf5	0.023159		Mapk1	Fgf5	0.0227111		Mapk1	Fgf5	0.131821
Mapk1	Fgf6	0.396986		Mapk1	Fgf6	0.127401		Mapk1	Fgf6	0.325173		Mapk1	Fgf6	0.132913
Mapk1	Fgf7	0.947389		Mapk1	Fgf7	0.229924		Mapk1	Fgf7	0.355869		Mapk1	Fgf7	0.632081
Mapk1	Fgf8	0.306386		Mapk1	Fgf8	0.634404		Mapk1	Fgf8	0.37804		Mapk1	Fgf8	0.230671
Mapk1	Fgfr1	0.0381394		Mapk1	Fgfr1	0.130309		Mapk1	Fgfr1	0.0842383		Mapk1	Fgfr1	0.15616
Mapk1	Fgfr2	0.100273		Mapk1	Fgfr2	0.555272		Mapk1	Fgfr2	0.327448		Mapk1	Fgfr2	0.130068
Mapk1	Fgfr3	0.257386		Mapk1	Fgfr3	0.0576886		Mapk1	Fgfr3	0.124466		Mapk1	Fgfr3	0.111798
Mapk1	Fgfr4	0.557742		Mapk1	Fgfr4	0.601054		Mapk1	Fgfr4	0.280362		Mapk1	Fgfr4	0.271953
Mapk1	Fos	0.0600798		Mapk1	Fos	0.0653366		Mapk1	Fos	0.049444		Mapk1	Fos	0.0933443
Mapk1	Jun	0.631078		Mapk1	Jun	0.776415		Mapk1	Jun	0.398578		Mapk1	Jun	0.0480348
Mapk1	Lif	0.732095		Mapk1	Lif	0.782333		Mapk1	Lif	0.692229		Mapk1	Lif	0.0842797
Mapk1	Lifr	0.995502		Mapk1	Lifr	0.904098		Mapk1	Lifr	0.95069		Mapk1	Lifr	0.237494
Mapk1	Map2k1	0.768707		Mapk1	Map2k1	0.918943		Mapk1	Map2k1	0.303187		Mapk1	Map2k1	0.155864
Mapk1	Map2k2	0.0513378		Mapk1	Map2k2	0.182713		Mapk1	Map2k2	0.286432		Mapk1	Map2k2	0.0936534
Mapk1	Map2k3	0.0229951		Mapk1	Map2k3	0.088731		Mapk1	Map2k3	0.0547685		Mapk1	Map2k3	0.216189
Mapk1	Map2k6	0.720276		Mapk1	Map2k6	0.0371311		Mapk1	Map2k6	0.141739		Mapk1	Map2k6	0.739987
Mapk1	Pdk1	0.291509		Mapk1	Pdk1	0.113521		Mapk1	Pdk1	0.0909453		Mapk1	Pdk1	0.0909453
Mapk1	Ptpn11	0.169223		Mapk1	Ptpn11	0.131569		Mapk1	Ptpn11	0.106224		Mapk1	Ptpn11	0.129611
Mapk1	Ptpn5	0.0375097		Mapk1	Ptpn5	0.0259456		Mapk1	Ptpn5	0.0261907		Mapk1	Ptpn5	0.124145
Mapk1	Ptpn7	0.7773		Mapk1	Ptpn7	0.0987223		Mapk1	Ptpn7	0.227067		Mapk1	Ptpn7	0.210703
Mapk1	Raf1	0.770345		Mapk1	Raf1	0.091948		Mapk1	Raf1	0.222533		Mapk1	Raf1	0.0867527
Mapk1	Sepp1	0.0772222		Mapk1	Sepp1	0.0781804		Mapk1	Sepp1	0.0565431		Mapk1	Sepp1	0.242731
Mapk1	Smad4	0.0309198		Mapk1	Smad4	0.0469858		Mapk1	Smad4	0.0643755		Mapk1	Smad4	0.0957824
Mapk1	Smad9	0.073915		Mapk1	Smad9	0.048209		Mapk1	Smad9	0.0482481		Mapk1	Smad9	0.174014
Mapk1	Sos1	0.0891644		Mapk1	Sos1	0.128151		Mapk1	Sos1	0.170675		Mapk1	Sos1	0.062385
Mapk12	Akt1	0.915245		Mapk12	Akt1	0.106128		Mapk12	Akt1	0.257146		Mapk12	Akt1	0.241879
Mapk12	Araf	0.0672661		Mapk12	Araf	0.0584192		Mapk12	Araf	0.10414		Mapk12	Araf	0.084787
Mapk12	Bmp4	0.799702		Mapk12	Bmp4	0.0659788		Mapk12	Bmp4	0.100795		Mapk12	Bmp4	0.0859774
Mapk12	Braf	0.999999		Mapk12	Braf	0.369528		Mapk12	Braf	0.883086		Mapk12	Braf	0.870455
Mapk12	Dusp6	0.291412		Mapk12	Dusp6	0.0293998		Mapk12	Dusp6	0.0336904		Mapk12	Dusp6	0.0578648
Mapk12	Egf	0.153109		Mapk12	Egf	0.0455252		Mapk12	Egf	0.0364466		Mapk12	Egf	0.17489
Mapk12	Egfr	0.150487		Mapk12	Egfr	0.132388		Mapk12	Egfr	0.268238		Mapk12	Egfr	0.292596
Mapk12	Fos	0.0530479		Mapk12	Fos	0.035326		Mapk12	Fos	0.0269939		Mapk12	Fos	0.0968288
Mapk12	Jun	0.158464		Mapk12	Jun	0.121202		Mapk12	Jun	0.110482		Mapk12	Jun	0.0696037
Mapk12	Lif	0.0505772		Mapk12	Lif	0.279524		Mapk12	Lif	0.318693		Mapk12	Lif	0.133751
Mapk12	Lifr	0.780244		Mapk12	Lifr	0.661771		Mapk12	Lifr	0.49615		Mapk12	Lifr	0.108864
Mapk12	Pdk1	0.0111953		Mapk12	Pdk1	0.271413		Mapk12	Pdk1	0.261431		Mapk12	Pdk1	0.251343
Mapk12	Ptpn11	0.0266972		Mapk12	Ptpn11	0.348681		Mapk12	Ptpn11	0.211129		Mapk12	Ptpn11	0.17757
Mapk12	Raf1	0.0397381		Mapk12	Raf1	0.166725		Mapk12	Raf1	0.0916989		Mapk12	Raf1	0.151021
Mapk12	Sepp1	0.0558205		Mapk12	Sepp1	0.14059		Mapk12	Sepp1	0.250681		Mapk12	Sepp1	0.165937
Mapk12	Smad4	0.0449069		Mapk12	Smad4	0.202925		Mapk12	Smad4	0.146177		Mapk12	Smad4	0.0945839
Mapk12	Smad9	0.00327585		Mapk12	Smad9	0.0777918		Mapk12	Smad9	0.19945		Mapk12	Smad9	0.105127
Mapk12	Sos1	0.99352		Mapk12	Sos1	0.336392		Mapk12	Sos1	0.589583		Mapk12	Sos1	0.392166
Mapk3	Ptpn5	0.386951		Mapk3	Ptpn5	0.127967		Mapk3	Ptpn5	0.165398		Mapk3	Ptpn5	0.0972239
Mapk3	Ptpn7	0.0504786		Mapk3	Ptpn7	0.423233		Mapk3	Ptpn7	0.458918		Mapk3	Ptpn7	0.234742
Mapk4	Akt1	0.013127		Mapk4	Akt1	0.0961061		Mapk4	Akt1	0.188884		Mapk4	Akt1	0.1057
Mapk4	Bmp4	0.152469		Mapk4	Bmp4	0.656675		Mapk4	Bmp4	0.389692		Mapk4	Bmp4	0.0334219
Mapk4	Egf	0.445851		Mapk4	Egf	0.747417		Mapk4	Egf	0.631956		Mapk4	Egf	0.114514
Mapk4	Egfr	0.293795		Mapk4	Egfr	0.0854413		Mapk4	Egfr	0.10353		Mapk4	Egfr	0.0807995
Mapk4	Fgf1	0.0440966		Mapk4	Fgf1	0.0327791		Mapk4	Fgf1	0.0331389		Mapk4	Fgf1	0.0871211
Mapk4	Fgf2	0.37281		Mapk4	Fgf2	0.972955		Mapk4	Fgf2	0.928777		Mapk4	Fgf2	0.0303746
Mapk4	Fgf3	0.956411		Mapk4	Fgf3	0.693197		Mapk4	Fgf3	0.639832		Mapk4	Fgf3	0.150306
Mapk4	Fgf4	0.149703		Mapk4	Fgf4	0.289387		Mapk4	Fgf4	0.106835		Mapk4	Fgf4	0.063993
Mapk4	Fgf5	0.163472		Mapk4	Fgf5	0.0788082		Mapk4	Fgf5	0.150339		Mapk4	Fgf5	0.106509
Mapk4	Fgf6	0.132705		Mapk4	Fgf6	0.80093		Mapk4	Fgf6	0.697892		Mapk4	Fgf6	0.0293097
Mapk4	Fgf7	0.837204		Mapk4	Fgf7	0.991678		Mapk4	Fgf7	0.974823		Mapk4	Fgf7	0.0896695
Mapk4	Fgf8	0.604178		Mapk4	Fgf8	0.798779		Mapk4	Fgf8	0.891494		Mapk4	Fgf8	0.0398305
Mapk4	Fgfr1	0.114278		Mapk4	Fgfr1	0.596038		Mapk4	Fgfr1	0.624292		Mapk4	Fgfr1	0.0193347
Mapk4	Fgfr2	0.257174		Mapk4	Fgfr2	0.0240352		Mapk4	Fgfr2	0.0523296		Mapk4	Fgfr2	0.0709828
Mapk4	Fgfr3	0.160117		Mapk4	Fgfr3	0.863837		Mapk4	Fgfr3	0.659436		Mapk4	Fgfr3	0.169689
Mapk4	Fgfr4	0.00844793		Mapk4	Fgfr4	0.0193925		Mapk4	Fgfr4	0.0708719		Mapk4	Fgfr4	0.0758376
Mapk4	Fos	0.184488		Mapk4	Fos	0.751251		Mapk4	Fos	0.569532		Mapk4	Fos	0.0970355
Mapk4	Jun	0.00692626		Mapk4	Jun	0.0556033		Mapk4	Jun	0.0391021		Mapk4	Jun	0.0282406
Mapk4	Lif	0.158621		Mapk4	Lif	0.378762		Mapk4	Lif	0.294425		Mapk4	Lif	0.41197
Mapk4	Lifr	0.356338		Mapk4	Lifr	0.13535		Mapk4	Lifr	0.280025		Mapk4	Lifr	0.0456129
Mapk4	Ptpn11	0.826926		Mapk4	Ptpn11	0.288612		Mapk4	Ptpn11	0.0914938		Mapk4	Ptpn11	0.091951
Mapk4	Raf1	0.909929		Mapk4	Raf1	0.267507		Mapk4	Raf1	0.262379		Mapk4	Raf1	0.200921
Mapk4	Sepp1	0.0131028		Mapk4	Sepp1	0.0477363		Mapk4	Sepp1	0.0339201		Mapk4	Sepp1	0.0838681
Mapk4	Smad4	0.019916		Mapk4	Smad4	0.0223628		Mapk4	Smad4	0.0278291		Mapk4	Smad4	0.0379893
Mapk4	Sos1	0.0423067		Mapk4	Sos1	0.0204574		Mapk4	Sos1	0.0767908		Mapk4	Sos1	0.0324672
Mapk6	Akt1	0.00962776		Mapk6	Akt1	0.0255572		Mapk6	Akt1	0.0432889		Mapk6	Akt1	0.0919414
Mapk6	Araf	0.0243319		Mapk6	Araf	0.0524995		Mapk6	Araf	0.0842098		Mapk6	Araf	0.138577
Mapk6	Bmp4	0.00920107		Mapk6	Bmp4	0.0149588		Mapk6	Bmp4	0.0253811		Mapk6	Bmp4	0.0941217
Mapk6	Braf	0.0412011		Mapk6	Braf	0.0968498		Mapk6	Braf	0.031036		Mapk6	Braf	0.0671595
Mapk6	Dusp6	0.133205		Mapk6	Dusp6	0.118984		Mapk6	Dusp6	0.130921		Mapk6	Dusp6	0.22989
Mapk6	Egf	0.0386686		Mapk6	Egf	0.327073		Mapk6	Egf	0.305471		Mapk6	Egf	0.0756504
Mapk6	Egfr	0.100188		Mapk6	Egfr	0.0899101		Mapk6	Egfr	0.0688288		Mapk6	Egfr	0.0513186
Mapk6	Fgf1	0.0255645		Mapk6	Fgf1	0.023514		Mapk6	Fgf1	0.0139936		Mapk6	Fgf1	0.88478
Mapk6	Fgf16	0.0401591		Mapk6	Fgf16	0.13738		Mapk6	Fgf16	0.186897		Mapk6	Fgf16	0.0540982
Mapk6	Fgf2	0.074973		Mapk6	Fgf2	0.263572		Mapk6	Fgf2	0.319625		Mapk6	Fgf2	0.0888672
Mapk6	Fgf20	0.085278		Mapk6	Fgf20	0.489645		Mapk6	Fgf20	0.283545		Mapk6	Fgf20	0.124554
Mapk6	Fgf21	0.0434472		Mapk6	Fgf21	0.00693252		Mapk6	Fgf21	0.00881843		Mapk6	Fgf21	0.0490161
Mapk6	Fgf22	0.18337		Mapk6	Fgf22	0.203053		Mapk6	Fgf22	0.0978892		Mapk6	Fgf22	0.0101733
Mapk6	Fgf23	0.779356		Mapk6	Fgf23	0.40094		Mapk6	Fgf23	0.556921		Mapk6	Fgf23	0.190739
Mapk6	Fgf3	0.0465833		Mapk6	Fgf3	0.029061		Mapk6	Fgf3	0.0347955		Mapk6	Fgf3	0.085942
Mapk6	Fgf4	0.562379		Mapk6	Fgf4	0.0616221		Mapk6	Fgf4	0.297608		Mapk6	Fgf4	0.0652649
Mapk6	Fgf5	0.204242		Mapk6	Fgf5	0.0691329		Mapk6	Fgf5	0.215642		Mapk6	Fgf5	0.110841
Mapk6	Fgf6	0.296046		Mapk6	Fgf6	0.0639843		Mapk6	Fgf6	0.144983		Mapk6	Fgf6	0.140255
Mapk6	Fgf7	0.914552		Mapk6	Fgf7	0.082208		Mapk6	Fgf7	0.135983		Mapk6	Fgf7	0.0143445
Mapk6	Fgf8	0.113171		Mapk6	Fgf8	0.0294779		Mapk6	Fgf8	0.0604233		Mapk6	Fgf8	0.0114371
Mapk6	Fgfr1	0.0342605		Mapk6	Fgfr1	0.06515		Mapk6	Fgfr1	0.132694		Mapk6	Fgfr1	0.0408317
Mapk6	Fgfr2	0.936721		Mapk6	Fgfr2	0.125492		Mapk6	Fgfr2	0.275981		Mapk6	Fgfr2	0.179624
Mapk6	Fgfr3	0.519992		Mapk6	Fgfr3	0.16188		Mapk6	Fgfr3	0.298006		Mapk6	Fgfr3	0.129364
Mapk6	Fgfr4	0.955684		Mapk6	Fgfr4	0.422997		Mapk6	Fgfr4	0.24839		Mapk6	Fgfr4	0.14006
Mapk6	Fos	0.449135		Mapk6	Fos	0.263671		Mapk6	Fos	0.248481		Mapk6	Fos	0.0588827
Mapk6	Jun	0.589267		Mapk6	Jun	0.510606		Mapk6	Jun	0.471129		Mapk6	Jun	0.0898959
Mapk6	Lif	0.980662		Mapk6	Lif	0.187358		Mapk6	Lif	0.294807		Mapk6	Lif	0.523028
Mapk6	Lifr	0.329727		Mapk6	Lifr	0.177475		Mapk6	Lifr	0.311367		Mapk6	Lifr	0.0426018
Mapk6	Pdk1	0.258015		Mapk6	Pdk1	0.274265		Mapk6	Pdk1	0.29633		Mapk6	Pdk1	0.172335
Mapk6	Ptpn11	0.999995		Mapk6	Ptpn11	0.966758		Mapk6	Ptpn11	0.9977		Mapk6	Ptpn11	0.560217
Mapk6	Raf1	0.200431		Mapk6	Raf1	0.0907033		Mapk6	Raf1	0.0372924		Mapk6	Raf1	0.110886
Mapk6	Sepp1	0.0351075		Mapk6	Sepp1	0.0435882		Mapk6	Sepp1	0.0636775		Mapk6	Sepp1	0.280453
Mapk6	Smad4	0.059905		Mapk6	Smad4	0.11338		Mapk6	Smad4	0.149912		Mapk6	Smad4	0.0981382
Mapk6	Smad9	0.87513		Mapk6	Smad9	0.531318		Mapk6	Smad9	0.727852		Mapk6	Smad9	0.403518
Mapk6	Sos1	1		Mapk6	Sos1	0.984235		Mapk6	Sos1	0.996834		Mapk6	Sos1	0.821069
Mapk7	Akt1	0.78256		Mapk7	Akt1	0.0445642		Mapk7	Akt1	0.0986385		Mapk7	Akt1	0.0784621
Mapk7	Araf	0.999992		Mapk7	Araf	0.99438		Mapk7	Araf	0.999446		Mapk7	Araf	0.38016
Mapk7	Bmp4	0.368086		Mapk7	Bmp4	0.477624		Mapk7	Bmp4	0.589716		Mapk7	Bmp4	0.0748478
Mapk7	Braf	0.724714		Mapk7	Braf	0.394269		Mapk7	Braf	0.157037		Mapk7	Braf	0.291556
Mapk7	Dusp6	0.0259443		Mapk7	Dusp6	0.0735131		Mapk7	Dusp6	0.0704325		Mapk7	Dusp6	0.0561857
Mapk7	Egf	0.684818		Mapk7	Egf	0.755613		Mapk7	Egf	0.739051		Mapk7	Egf	0.444588
Mapk7	Egfr	0.992153		Mapk7	Egfr	0.853788		Mapk7	Egfr	0.977517		Mapk7	Egfr	0.136551
Mapk7	Fgf1	0.907847		Mapk7	Fgf1	0.53906		Mapk7	Fgf1	0.632452		Mapk7	Fgf1	0.319972
Mapk7	Fgf16	0.999964		Mapk7	Fgf16	0.837012		Mapk7	Fgf16	0.962616		Mapk7	Fgf16	0.141775
Mapk7	Fgf2	0.999998		Mapk7	Fgf2	0.928129		Mapk7	Fgf2	0.998231		Mapk7	Fgf2	0.67172
Mapk7	Fgf20	0.883781		Mapk7	Fgf20	0.498003		Mapk7	Fgf20	0.569781		Mapk7	Fgf20	0.0379934
Mapk7	Fgf21	0.989276		Mapk7	Fgf21	0.458598		Mapk7	Fgf21	0.907805		Mapk7	Fgf21	0.6104
Mapk7	Fgf22	0.999992		Mapk7	Fgf22	0.946346		Mapk7	Fgf22	0.998695		Mapk7	Fgf22	0.685302
Mapk7	Fgf23	0.99099		Mapk7	Fgf23	0.898684		Mapk7	Fgf23	0.961647		Mapk7	Fgf23	0.127465
Mapk7	Fgf3	0.993432		Mapk7	Fgf3	0.987674		Mapk7	Fgf3	0.965973		Mapk7	Fgf3	0.112496
Mapk7	Fgf4	0.940785		Mapk7	Fgf4	0.235056		Mapk7	Fgf4	0.137997		Mapk7	Fgf4	0.164644
Mapk7	Fgf5	0.436536		Mapk7	Fgf5	0.113194		Mapk7	Fgf5	0.160885		Mapk7	Fgf5	0.053898
Mapk7	Fgf6	0.847027		Mapk7	Fgf6	0.508056		Mapk7	Fgf6	0.427651		Mapk7	Fgf6	0.141697
Mapk7	Fgf7	0.999458		Mapk7	Fgf7	0.74184		Mapk7	Fgf7	0.538778		Mapk7	Fgf7	0.843913
Mapk7	Fgf8	1		Mapk7	Fgf8	0.997891		Mapk7	Fgf8	0.999758		Mapk7	Fgf8	0.834272
Mapk7	Fgfr1	0.983253		Mapk7	Fgfr1	0.993897		Mapk7	Fgfr1	0.995955		Mapk7	Fgfr1	0.500729
Mapk7	Fgfr2	0.534634		Mapk7	Fgfr2	0.222065		Mapk7	Fgfr2	0.388438		Mapk7	Fgfr2	0.0665431
Mapk7	Fgfr3	0.999467		Mapk7	Fgfr3	0.545302		Mapk7	Fgfr3	0.636836		Mapk7	Fgfr3	0.739976
Mapk7	Fgfr4	0.414872		Mapk7	Fgfr4	0.231213		Mapk7	Fgfr4	0.236109		Mapk7	Fgfr4	0.135609
Mapk7	Fos	0.990203		Mapk7	Fos	0.505736		Mapk7	Fos	0.270917		Mapk7	Fos	0.260697
Mapk7	Jun	0.999978		Mapk7	Jun	0.658589		Mapk7	Jun	0.786855		Mapk7	Jun	0.790864
Mapk7	Lif	0.996348		Mapk7	Lif	0.587296		Mapk7	Lif	0.590029		Mapk7	Lif	0.45736
Mapk7	Lifr	0.776088		Mapk7	Lifr	0.302775		Mapk7	Lifr	0.201535		Mapk7	Lifr	0.325823
Mapk7	Map2k1	0.916355		Mapk7	Map2k1	0.147347		Mapk7	Map2k1	0.599177		Mapk7	Map2k1	0.132907
Mapk7	Map2k2	0.759168		Mapk7	Map2k2	0.289903		Mapk7	Map2k2	0.787892		Mapk7	Map2k2	0.0415649
Mapk7	Map2k3	0.997301		Mapk7	Map2k3	0.739057		Mapk7	Map2k3	0.956665		Mapk7	Map2k3	0.464575
Mapk7	Map2k6	0.999431		Mapk7	Map2k6	0.636455		Mapk7	Map2k6	0.867885		Mapk7	Map2k6	0.854873
Mapk7	Pdk1	0.98449		Mapk7	Pdk1	0.783286		Mapk7	Pdk1	0.944081		Mapk7	Pdk1	0.431541
Mapk7	Ptpn11	0.914533		Mapk7	Ptpn11	0.472946		Mapk7	Ptpn11	0.716545		Mapk7	Ptpn11	0.10748
Mapk7	Raf1	0.966601		Mapk7	Raf1	0.851836		Mapk7	Raf1	0.614284		Mapk7	Raf1	0.134678
Mapk7	Sepp1	0.98859		Mapk7	Sepp1	0.151086		Mapk7	Sepp1	0.560858		Mapk7	Sepp1	0.0197152
Mapk7	Smad4	0.999979		Mapk7	Smad4	0.985957		Mapk7	Smad4	0.960808		Mapk7	Smad4	0.579491
Mapk7	Smad9	1		Mapk7	Smad9	0.878576		Mapk7	Smad9	0.956498		Mapk7	Smad9	0.46662
Mapk7	Sos1	0.650394		Mapk7	Sos1	0.129872		Mapk7	Sos1	0.125004		Mapk7	Sos1	0.0730809
Mbd3	Sall4	1		Mbd3	Sall4	0.987935		Mbd3	Sall4	0.998312		Mbd3	Sall4	0.963901
Mdm2	Trp53	0.0393145		Mdm2	Trp53	0.266453		Mdm2	Trp53	0.119675		Mdm2	Trp53	0.198995
Mga	Nanog	0.551951		Mga	Nanog	0.0858419		Mga	Nanog	0.400258		Mga	Nanog	0.387908
Mga	Sox2	0.0243744		Mga	Sox2	0.197806		Mga	Sox2	0.158286		Mga	Sox2	0.109047
Mtor	Akt1	0.0739171		Mtor	Akt1	0.616179		Mtor	Akt1	0.641094		Mtor	Akt1	0.247085
Mybl2	Ccnb1	0.117004		Mybl2	Ccnb1	0.0213214		Mybl2	Ccnb1	0.0258617		Mybl2	Ccnb1	0.121967
Mybl2	Pou5f1	0.628473		Mybl2	Pou5f1	0.0568626		Mybl2	Pou5f1	0.109696		Mybl2	Pou5f1	0.105211
Mybl2	Sox2	0.999987		Mybl2	Sox2	0.791775		Mybl2	Sox2	0.995793		Mybl2	Sox2	0.476298
Myc	Mycn	0.861995		Myc	Mycn	0.477002		Myc	Mycn	0.620262		Myc	Mycn	0.112808
Myc	Wnt2	0.0023692		Myc	Wnt2	0.544724		Myc	Wnt2	0.281064		Myc	Wnt2	0.0277216
Myc	Wnt3	0.0968999		Myc	Wnt3	0.126431		Myc	Wnt3	0.0863742		Myc	Wnt3	0.0757582
Myc	Wnt3a	0.704827		Myc	Wnt3a	0.100875		Myc	Wnt3a	0.226707		Myc	Wnt3a	0.154779
Myc	Wnt4	0.21904		Myc	Wnt4	0.123373		Myc	Wnt4	0.151769		Myc	Wnt4	0.127651
Myc	Wnt5a	0.124248		Myc	Wnt5a	0.0964407		Myc	Wnt5a	0.341419		Myc	Wnt5a	0.0709775
Myc	Wnt5b	0.0574916		Myc	Wnt5b	0.0492819		Myc	Wnt5b	0.0186837		Myc	Wnt5b	0.131114
Myc	Wnt6	0.17948		Myc	Wnt6	0.155518		Myc	Wnt6	0.113534		Myc	Wnt6	0.0499169
Myc	Wnt7a	0.0413368		Myc	Wnt7a	0.760257		Myc	Wnt7a	0.329501		Myc	Wnt7a	0.0797344
Myc	Wnt7b	0.238686		Myc	Wnt7b	0.177886		Myc	Wnt7b	0.0614478		Myc	Wnt7b	0.216375
Myc	Zfx	0.318994		Myc	Zfx	0.888246		Myc	Zfx	0.501244		Myc	Zfx	0.0468505
Mycn	Zfx	0.463719		Mycn	Zfx	0.47715		Mycn	Zfx	0.153723		Mycn	Zfx	0.0925877
Nacc1	Nanog	0.190822		Nacc1	Nanog	0.089595		Nacc1	Nanog	0.24656		Nacc1	Nanog	0.208854
Nanog	Cbx2	0.045879		Nanog	Cbx2	0.0531321		Nanog	Cbx2	0.116548		Nanog	Cbx2	0.0727169
Nanog	Cdx2	0.55894		Nanog	Cdx2	0.198024		Nanog	Cdx2	0.0440138		Nanog	Cdx2	0.143193
Nanog	Cnot3	0.213496		Nanog	Cnot3	0.70014		Nanog	Cnot3	0.203592		Nanog	Cnot3	0.102096
Nanog	Ctnnb1	0.0530609		Nanog	Ctnnb1	0.58087		Nanog	Ctnnb1	0.132453		Nanog	Ctnnb1	0.0812631
Nanog	Dnmt1	0.86155		Nanog	Dnmt1	0.248083		Nanog	Dnmt1	0.495566		Nanog	Dnmt1	0.751151
Nanog	Eny2	0.0654796		Nanog	Eny2	0.162944		Nanog	Eny2	0.201432		Nanog	Eny2	0.0476547
Nanog	Fgf2	0.102895		Nanog	Fgf2	0.0470147		Nanog	Fgf2	0.044213		Nanog	Fgf2	0.194457
Nanog	Gata4	0.0278697		Nanog	Gata4	0.123259		Nanog	Gata4	0.051449		Nanog	Gata4	0.127524
Nanog	Hesx1	0.247036		Nanog	Hesx1	0.469117		Nanog	Hesx1	0.407504		Nanog	Hesx1	0.091112
Nanog	Hnf1a	0.62971		Nanog	Hnf1a	0.959134		Nanog	Hnf1a	0.928634		Nanog	Hnf1a	0.109431
Nanog	Hnf1b	0.689407		Nanog	Hnf1b	0.0168368		Nanog	Hnf1b	0.0140901		Nanog	Hnf1b	0.0849465
Nanog	Kdm3a	0.0193748		Nanog	Kdm3a	0.0221424		Nanog	Kdm3a	0.0290221		Nanog	Kdm3a	0.124887
Nanog	Kdm4c	0.0741737		Nanog	Kdm4c	0.0748537		Nanog	Kdm4c	0.172939		Nanog	Kdm4c	0.246546
Nanog	Lefty2	0.0245428		Nanog	Lefty2	0.0853052		Nanog	Lefty2	0.0958288		Nanog	Lefty2	0.0391892
Nanog	Lif	0.00882137		Nanog	Lif	0.0183601		Nanog	Lif	0.00305074		Nanog	Lif	0.0567802
Nanog	Med12	0.404453		Nanog	Med12	0.118933		Nanog	Med12	0.157737		Nanog	Med12	0.122611
Nanog	Nfkb1	0.0548421		Nanog	Nfkb1	0.0669962		Nanog	Nfkb1	0.0469984		Nanog	Nfkb1	0.206346
Nanog	Paf1	0.100479		Nanog	Paf1	0.024032		Nanog	Paf1	0.0316362		Nanog	Paf1	0.473832
Nanog	Pbrm1	0.0197263		Nanog	Pbrm1	0.0263118		Nanog	Pbrm1	0.0342123		Nanog	Pbrm1	0.083396
Nanog	Pcgf2	0.077435		Nanog	Pcgf2	0.030841		Nanog	Pcgf2	0.0540073		Nanog	Pcgf2	0.221642
Nanog	Pcid2	0.0947477		Nanog	Pcid2	0.346223		Nanog	Pcid2	0.241272		Nanog	Pcid2	0.121727
Nanog	Rel	0.0394882		Nanog	Rel	0.0808651		Nanog	Rel	0.0424333		Nanog	Rel	0.201293
Nanog	Sall4	0.241556		Nanog	Sall4	0.323291		Nanog	Sall4	0.129602		Nanog	Sall4	0.23227
Nanog	Smad4	0.0803702		Nanog	Smad4	0.064854		Nanog	Smad4	0.0841476		Nanog	Smad4	0.121759
Nanog	Smarca2	0.184216		Nanog	Smarca2	0.496642		Nanog	Smarca2	0.390861		Nanog	Smarca2	0.0903052
Nanog	Smarca4	0.0684888		Nanog	Smarca4	0.0635406		Nanog	Smarca4	0.0942988		Nanog	Smarca4	0.122332
Nanog	Sox11	0.0220403		Nanog	Sox11	0.148906		Nanog	Sox11	0.0844786		Nanog	Sox11	0.0700932
Nanog	Sox15	0.10763		Nanog	Sox15	0.169282		Nanog	Sox15	0.336128		Nanog	Sox15	0.0481798
Nanog	Sox2	0.0520687		Nanog	Sox2	0.0447955		Nanog	Sox2	0.0974037		Nanog	Sox2	0.171681
Nanog	T	0.0260133		Nanog	T	0.116369		Nanog	T	0.120494		Nanog	T	0.132094
Nanog	Tbx3	0.0563346		Nanog	Tbx3	0.135083		Nanog	Tbx3	0.203462		Nanog	Tbx3	0.0887074
Nanog	Tcf3	0.0622426		Nanog	Tcf3	0.147797		Nanog	Tcf3	0.0814829		Nanog	Tcf3	0.130824
Nanog	Trp53	0.0940921		Nanog	Trp53	0.65153		Nanog	Trp53	0.220826		Nanog	Trp53	0.109995
Nanog	Wnt1	0.141664		Nanog	Wnt1	0.0495731		Nanog	Wnt1	0.0841837		Nanog	Wnt1	0.15936
Nanog	Wnt16	0.13418		Nanog	Wnt16	0.232639		Nanog	Wnt16	0.13517		Nanog	Wnt16	0.0307003
Nanog	Wnt2	0.0864496		Nanog	Wnt2	0.679182		Nanog	Wnt2	0.185271		Nanog	Wnt2	0.589674
Nanog	Wnt3	0.328167		Nanog	Wnt3	0.271053		Nanog	Wnt3	0.279659		Nanog	Wnt3	0.0708983
Nanog	Wnt3a	0.0765586		Nanog	Wnt3a	0.273234		Nanog	Wnt3a	0.0986891		Nanog	Wnt3a	0.233649
Nanog	Wnt4	0.60153		Nanog	Wnt4	0.220349		Nanog	Wnt4	0.192372		Nanog	Wnt4	0.232277
Nanog	Wnt5a	0.0137602		Nanog	Wnt5a	0.183296		Nanog	Wnt5a	0.27912		Nanog	Wnt5a	0.0615239
Nanog	Wnt5b	0.678913		Nanog	Wnt5b	0.225528		Nanog	Wnt5b	0.321043		Nanog	Wnt5b	0.183604
Nanog	Wnt6	0.12876		Nanog	Wnt6	0.470956		Nanog	Wnt6	0.276804		Nanog	Wnt6	0.273673
Nanog	Wnt7a	0.3374		Nanog	Wnt7a	0.476742		Nanog	Wnt7a	0.240371		Nanog	Wnt7a	0.27419
Nanog	Wnt7b	0.162699		Nanog	Wnt7b	0.0335538		Nanog	Wnt7b	0.0710637		Nanog	Wnt7b	0.17086
Nanog	Xist	0.0980294		Nanog	Xist	0.154071		Nanog	Xist	0.062836		Nanog	Xist	0.236376
Nanog	Zfp281	0.203304		Nanog	Zfp281	0.187298		Nanog	Zfp281	0.115814		Nanog	Zfp281	0.0815938
Nanog	Zfp42	0.0851326		Nanog	Zfp42	0.0877099		Nanog	Zfp42	0.101641		Nanog	Zfp42	0.0750387
Nes	Lyar	0.0200464		Nes	Lyar	0.193735		Nes	Lyar	0.0819175		Nes	Lyar	0.0757248
Nfkb2	Nanog	0.393411		Nfkb2	Nanog	0.450401		Nfkb2	Nanog	0.134769		Nfkb2	Nanog	0.0737562
Nkap	Shh	0.388685		Nkap	Shh	0.460227		Nkap	Shh	0.254868		Nkap	Shh	0.0495721
Nog	Actr2	0.198158		Nog	Actr2	0.303336		Nog	Actr2	0.149842		Nog	Actr2	0.019054
Nog	Acvr1	0.136487		Nog	Acvr1	0.0806465		Nog	Acvr1	0.0530912		Nog	Acvr1	0.069147
Nog	Acvr2b	0.658569		Nog	Acvr2b	0.134315		Nog	Acvr2b	0.149689		Nog	Acvr2b	0.0116086
Nog	Bmp4	0.252096		Nog	Bmp4	0.395945		Nog	Bmp4	0.124442		Nog	Bmp4	0.0682361
Nog	Bmpr1a	0.64291		Nog	Bmpr1a	0.576833		Nog	Bmpr1a	0.363195		Nog	Bmpr1a	0.141976
Nog	Bmpr1b	0.0356956		Nog	Bmpr1b	0.206696		Nog	Bmpr1b	0.13246		Nog	Bmpr1b	0.264372
Nog	Bmpr2	0.793533		Nog	Bmpr2	0.263131		Nog	Bmpr2	0.275967		Nog	Bmpr2	0.680488
Nog	Smad1	0.795351		Nog	Smad1	0.0351234		Nog	Smad1	0.0829437		Nog	Smad1	0.161182
Nog	Smad4	0.491151		Nog	Smad4	0.0781604		Nog	Smad4	0.0565691		Nog	Smad4	0.0972155
Nog	Smad5	0.0226975		Nog	Smad5	0.0614403		Nog	Smad5	0.052822		Nog	Smad5	0.136719
Nog	Smad9	0.988198		Nog	Smad9	0.344227		Nog	Smad9	0.847999		Nog	Smad9	0.203803
Nr0b1	Nanog	0.289951		Nr0b1	Nanog	0.0977622		Nr0b1	Nanog	0.0557401		Nr0b1	Nanog	0.115754
Nr2f1	Gabpa	0.148607		Nr2f1	Gabpa	0.254656		Nr2f1	Gabpa	0.294184		Nr2f1	Gabpa	0.101913
Nr2f2	Gabpa	0.0741219		Nr2f2	Gabpa	0.0110351		Nr2f2	Gabpa	0.00592675		Nr2f2	Gabpa	0.178784
Nr2f2	Sox2	0.0877585		Nr2f2	Sox2	0.0889014		Nr2f2	Sox2	0.0317463		Nr2f2	Sox2	0.38645
Nr5a2	Sox2	0.0803597		Nr5a2	Sox2	0.00564337		Nr5a2	Sox2	0.00337697		Nr5a2	Sox2	0.0500932
Nr6a1	Gabpa	0.560005		Nr6a1	Gabpa	0.0168456		Nr6a1	Gabpa	0.010166		Nr6a1	Gabpa	0.290803
Otx2	Sox15	0.497162		Otx2	Sox15	0.419972		Otx2	Sox15	0.0830839		Otx2	Sox15	0.0682905
Paf1	Fgf8	0.0125631		Paf1	Fgf8	0.0642349		Paf1	Fgf8	0.0363618		Paf1	Fgf8	0.109919
Paf1	Gata4	0.0212754		Paf1	Gata4	0.0629374		Paf1	Gata4	0.0500516		Paf1	Gata4	0.0571147
Paf1	Shh	0.124629		Paf1	Shh	0.0599403		Paf1	Shh	0.0540744		Paf1	Shh	0.1966
Paf1	Sox2	0.0080583		Paf1	Sox2	0.0461945		Paf1	Sox2	0.0330111		Paf1	Sox2	0.190494
Pcgf6	Nanog	0.450942		Pcgf6	Nanog	0.0344102		Pcgf6	Nanog	0.00966979		Pcgf6	Nanog	0.0600742
Pcgf6	Sox2	0.246451		Pcgf6	Sox2	0.04788		Pcgf6	Sox2	0.0119808		Pcgf6	Sox2	0.142383
Pcid2	Sox2	0.0847418		Pcid2	Sox2	0.0301669		Pcid2	Sox2	0.0313447		Pcid2	Sox2	0.106
Pdgfa	Pdgfb	0.426286		Pdgfa	Pdgfb	0.0548827		Pdgfa	Pdgfb	0.0745617		Pdgfa	Pdgfb	0.0311811
Pdgfa	Pdgfra	0.119		Pdgfa	Pdgfra	0.149442		Pdgfa	Pdgfra	0.0678906		Pdgfa	Pdgfra	0.140459
Pdgfa	Pdgfrb	0.0689015		Pdgfa	Pdgfrb	0.19648		Pdgfa	Pdgfrb	0.210336		Pdgfa	Pdgfrb	0.0598426
Pdgfb	Pdgfra	0.0851591		Pdgfb	Pdgfra	0.0540769		Pdgfb	Pdgfra	0.0230109		Pdgfb	Pdgfra	0.588543
Pdgfb	Pdgfrb	0.142162		Pdgfb	Pdgfrb	0.249881		Pdgfb	Pdgfrb	0.172467		Pdgfb	Pdgfrb	0.206095
Pdk1	Akt1	0.147683		Pdk1	Akt1	0.402046		Pdk1	Akt1	0.221816		Pdk1	Akt1	0.522764
Pdk1	Fos	0.0289584		Pdk1	Fos	0.0211443		Pdk1	Fos	0.0690911		Pdk1	Fos	0.0496216
Pdk1	Jun	0.0450513		Pdk1	Jun	0.175173		Pdk1	Jun	0.31452		Pdk1	Jun	0.113845
Pdk1	Mapk4	0.155199		Pdk1	Mapk4	0.423203		Pdk1	Mapk4	0.589469		Pdk1	Mapk4	0.112312
Phc1	Rnf2	0.0728101		Phc1	Rnf2	0.346733		Phc1	Rnf2	0.0925794		Phc1	Rnf2	0.118925
Phc1	Yy1	0.151233		Phc1	Yy1	0.54571		Phc1	Yy1	0.293922		Phc1	Yy1	0.149792
Phc2	Nanog	0.0510655		Phc2	Nanog	0.229843		Phc2	Nanog	0.13839		Phc2	Nanog	0.182954
Phc2	Sox2	0.211039		Phc2	Sox2	0.195851		Phc2	Sox2	0.189105		Phc2	Sox2	0.353483
Phc2	Yy1	0.9968		Phc2	Yy1	0.381782		Phc2	Yy1	0.679921		Phc2	Yy1	0.826516
Pik3ca	Ptpn11	0.160959		Pik3ca	Ptpn11	0.0943356		Pik3ca	Ptpn11	0.224481		Pik3ca	Ptpn11	0.185565
Pik3cb	Ptpn11	0.495123		Pik3cb	Ptpn11	0.0628495		Pik3cb	Ptpn11	0.119137		Pik3cb	Ptpn11	0.441795
Pik3cd	Egf	0.98633		Pik3cd	Egf	0.741646		Pik3cd	Egf	0.67425		Pik3cd	Egf	0.0960791
Pik3cd	Egfr	0.0350481		Pik3cd	Egfr	0.0559007		Pik3cd	Egfr	0.0564993		Pik3cd	Egfr	0.0259272
Pik3cd	Eras	0.838341		Pik3cd	Eras	0.881372		Pik3cd	Eras	0.687265		Pik3cd	Eras	0.0370032
Pik3cd	Fos	0.95844		Pik3cd	Fos	0.293703		Pik3cd	Fos	0.344773		Pik3cd	Fos	0.187909
Pik3cd	Jun	0.14382		Pik3cd	Jun	0.204757		Pik3cd	Jun	0.0610965		Pik3cd	Jun	0.0789295
Pik3cd	Mapk1	0.0920523		Pik3cd	Mapk1	0.160066		Pik3cd	Mapk1	0.196997		Pik3cd	Mapk1	0.359962
Pik3cd	Mapk12	0.33334		Pik3cd	Mapk12	0.0909221		Pik3cd	Mapk12	0.0960611		Pik3cd	Mapk12	0.162299
Pik3cd	Mapk4	0.122164		Pik3cd	Mapk4	0.0796285		Pik3cd	Mapk4	0.031361		Pik3cd	Mapk4	0.064731
Pik3cd	Mapk6	0.00898889		Pik3cd	Mapk6	0.0541304		Pik3cd	Mapk6	0.0400184		Pik3cd	Mapk6	0.0640863
Pik3cd	Mapk7	0.249091		Pik3cd	Mapk7	0.0375881		Pik3cd	Mapk7	0.0803273		Pik3cd	Mapk7	0.0586914
Pik3cd	Pdgfa	0.59045		Pik3cd	Pdgfa	0.0416843		Pik3cd	Pdgfa	0.0280166		Pik3cd	Pdgfa	0.118861
Pik3cd	Pdgfb	0.431345		Pik3cd	Pdgfb	0.072567		Pik3cd	Pdgfb	0.170515		Pik3cd	Pdgfb	0.064714
Pik3cd	Pdgfra	0.306179		Pik3cd	Pdgfra	0.0508634		Pik3cd	Pdgfra	0.0281911		Pik3cd	Pdgfra	0.695265
Pik3cd	Pdgfrb	0.185659		Pik3cd	Pdgfrb	0.282132		Pik3cd	Pdgfrb	0.239442		Pik3cd	Pdgfrb	0.13117
Pik3cd	Pik3r2	0.215561		Pik3cd	Pik3r2	0.0806763		Pik3cd	Pik3r2	0.0706553		Pik3cd	Pik3r2	0.0605044
Pik3r1	Ptpn11	0.975951		Pik3r1	Ptpn11	0.975838		Pik3r1	Ptpn11	0.717527		Pik3r1	Ptpn11	0.180286
Pik3r2	Egf	0.545534		Pik3r2	Egf	0.971844		Pik3r2	Egf	0.623332		Pik3r2	Egf	0.123997
Pik3r2	Egfr	0.411122		Pik3r2	Egfr	0.459576		Pik3r2	Egfr	0.0316119		Pik3r2	Egfr	0.19068
Pik3r2	Eras	0.716015		Pik3r2	Eras	0.471009		Pik3r2	Eras	0.0192844		Pik3r2	Eras	0.152983
Pik3r2	Fos	0.0915619		Pik3r2	Fos	0.335914		Pik3r2	Fos	0.0977812		Pik3r2	Fos	0.106201
Pik3r2	Jun	0.256059		Pik3r2	Jun	0.0749478		Pik3r2	Jun	0.156909		Pik3r2	Jun	0.0823747
Pik3r2	Mapk1	0.33067		Pik3r2	Mapk1	0.519083		Pik3r2	Mapk1	0.672259		Pik3r2	Mapk1	0.132802
Pik3r2	Mapk12	0.998808		Pik3r2	Mapk12	0.268665		Pik3r2	Mapk12	0.633207		Pik3r2	Mapk12	0.803662
Pik3r2	Mapk4	0.519916		Pik3r2	Mapk4	0.504823		Pik3r2	Mapk4	0.286852		Pik3r2	Mapk4	0.0391948
Pik3r2	Mapk6	0.163726		Pik3r2	Mapk6	0.606487		Pik3r2	Mapk6	0.271095		Pik3r2	Mapk6	0.16546
Pik3r2	Mapk7	0.105254		Pik3r2	Mapk7	0.03762		Pik3r2	Mapk7	0.0548078		Pik3r2	Mapk7	0.411769
Pik3r2	Pdgfa	0.121838		Pik3r2	Pdgfa	0.0596603		Pik3r2	Pdgfa	0.120439		Pik3r2	Pdgfa	0.345063
Pik3r2	Pdgfb	0.385674		Pik3r2	Pdgfb	0.269196		Pik3r2	Pdgfb	0.104789		Pik3r2	Pdgfb	0.180169
Pik3r2	Pdgfra	0.0197494		Pik3r2	Pdgfra	0.0343768		Pik3r2	Pdgfra	0.0193956		Pik3r2	Pdgfra	0.243998
Pik3r2	Pdgfrb	0.290507		Pik3r2	Pdgfrb	0.133702		Pik3r2	Pdgfrb	0.382419		Pik3r2	Pdgfrb	0.156272
Pml	Nanog	0.0882738		Pml	Nanog	0.0607067		Pml	Nanog	0.0772754		Pml	Nanog	0.0813195
Polr2j	Ep300	0.406341		Polr2j	Ep300	0.0237462		Polr2j	Ep300	0.0202391		Polr2j	Ep300	0.006169
Polr2j	Esrrb	0.331138		Polr2j	Esrrb	0.348594		Polr2j	Esrrb	0.267968		Polr2j	Esrrb	0.245701
Polr2j	Klf4	0.316128		Polr2j	Klf4	0.139086		Polr2j	Klf4	0.122194		Polr2j	Klf4	0.105378
Polr2j	Nanog	0.378754		Polr2j	Nanog	0.940715		Polr2j	Nanog	0.324374		Polr2j	Nanog	0.133467
Polr2j	Smad4	0.691504		Polr2j	Smad4	0.674061		Polr2j	Smad4	0.120524		Polr2j	Smad4	0.457758
Polr2j	Smad5	0.505994		Polr2j	Smad5	0.975246		Polr2j	Smad5	0.558294		Polr2j	Smad5	0.214953
Polr2j	Smad9	0.144624		Polr2j	Smad9	0.239941		Polr2j	Smad9	0.030784		Polr2j	Smad9	0.158998
Polr2j	Sox2	0.288449		Polr2j	Sox2	0.271248		Polr2j	Sox2	0.367753		Polr2j	Sox2	0.0925567
Polr2j	Zfp281	0.0614144		Polr2j	Zfp281	0.0511066		Polr2j	Zfp281	0.103367		Polr2j	Zfp281	0.251635
Pou5f1	Bmi1	0.919089		Pou5f1	Bmi1	0.997044		Pou5f1	Bmi1	0.987889		Pou5f1	Bmi1	0.0604243
Pou5f1	Cbx2	0.193041		Pou5f1	Cbx2	0.136549		Pou5f1	Cbx2	0.185959		Pou5f1	Cbx2	0.29343
Pou5f1	Cbx8	0.294627		Pou5f1	Cbx8	0.457391		Pou5f1	Cbx8	0.200047		Pou5f1	Cbx8	0.026986
Pou5f1	Cdkn1a	0.0746155		Pou5f1	Cdkn1a	0.967729		Pou5f1	Cdkn1a	0.924898		Pou5f1	Cdkn1a	0.0571098
Pou5f1	Cdx2	0.491856		Pou5f1	Cdx2	0.090511		Pou5f1	Cdx2	0.111425		Pou5f1	Cdx2	0.202141
Pou5f1	Cga	0.469099		Pou5f1	Cga	0.261783		Pou5f1	Cga	0.431341		Pou5f1	Cga	0.130222
Pou5f1	Cnot3	0.05809		Pou5f1	Cnot3	0.0744402		Pou5f1	Cnot3	0.0407519		Pou5f1	Cnot3	0.0896182
Pou5f1	Crebbp	0.0282808		Pou5f1	Crebbp	0.117974		Pou5f1	Crebbp	0.0516182		Pou5f1	Crebbp	0.072523
Pou5f1	Ctcf	0.652899		Pou5f1	Ctcf	0.544856		Pou5f1	Ctcf	0.612143		Pou5f1	Ctcf	0.0967088
Pou5f1	Ctnnb1	0.139372		Pou5f1	Ctnnb1	0.852672		Pou5f1	Ctnnb1	0.232609		Pou5f1	Ctnnb1	0.137089
Pou5f1	Dgcr8	0.0422805		Pou5f1	Dgcr8	0.19229		Pou5f1	Dgcr8	0.0165055		Pou5f1	Dgcr8	0.144446
Pou5f1	Dicer1	0.367609		Pou5f1	Dicer1	0.870814		Pou5f1	Dicer1	0.867765		Pou5f1	Dicer1	0.341596
Pou5f1	Dppa3	0.0190779		Pou5f1	Dppa3	0.626767		Pou5f1	Dppa3	0.220576		Pou5f1	Dppa3	0.04132
Pou5f1	Eed	0.1936		Pou5f1	Eed	0.854263		Pou5f1	Eed	0.250233		Pou5f1	Eed	0.18507
Pou5f1	Ehmt2	0.148379		Pou5f1	Ehmt2	0.477206		Pou5f1	Ehmt2	0.026761		Pou5f1	Ehmt2	0.133721
Pou5f1	Eny2	0.100028		Pou5f1	Eny2	0.0336337		Pou5f1	Eny2	0.0655401		Pou5f1	Eny2	0.113394
Pou5f1	Ep300	0.0435973		Pou5f1	Ep300	0.0793331		Pou5f1	Ep300	0.110611		Pou5f1	Ep300	0.081422
Pou5f1	Esrrb	0.0762122		Pou5f1	Esrrb	0.220921		Pou5f1	Esrrb	0.157246		Pou5f1	Esrrb	0.124012
Pou5f1	Fbxo15	0.0247606		Pou5f1	Fbxo15	0.0193766		Pou5f1	Fbxo15	0.0195923		Pou5f1	Fbxo15	0.113239
Pou5f1	Fgf4	0.236412		Pou5f1	Fgf4	0.209709		Pou5f1	Fgf4	0.291762		Pou5f1	Fgf4	0.190057
Pou5f1	Fip1l1	0.0987665		Pou5f1	Fip1l1	0.0481425		Pou5f1	Fip1l1	0.0337383		Pou5f1	Fip1l1	0.0665515
Pou5f1	Foxd3	0.0902571		Pou5f1	Foxd3	0.0988328		Pou5f1	Foxd3	0.120039		Pou5f1	Foxd3	0.0967225
Pou5f1	Fzd5	0.0962512		Pou5f1	Fzd5	0.0381585		Pou5f1	Fzd5	0.0858244		Pou5f1	Fzd5	0.0378581
Pou5f1	Gabpa	0.00428952		Pou5f1	Gabpa	0.0390461		Pou5f1	Gabpa	0.0484722		Pou5f1	Gabpa	0.0700204
Pou5f1	Gata6	0.0656497		Pou5f1	Gata6	0.0396229		Pou5f1	Gata6	0.103929		Pou5f1	Gata6	0.0752154
Pou5f1	Gdf3	0.00305447		Pou5f1	Gdf3	0.0810382		Pou5f1	Gdf3	0.0450868		Pou5f1	Gdf3	0.0225478
Pou5f1	Gja1	0.0269453		Pou5f1	Gja1	0.292716		Pou5f1	Gja1	0.25314		Pou5f1	Gja1	0.157585
Pou5f1	Gli1	0.00588332		Pou5f1	Gli1	0.219061		Pou5f1	Gli1	0.136462		Pou5f1	Gli1	0.0401723
Pou5f1	Grm5	0.0103038		Pou5f1	Grm5	0.00961992		Pou5f1	Grm5	0.0160322		Pou5f1	Grm5	0.154755
Pou5f1	Hand1	0.374582		Pou5f1	Hand1	0.222168		Pou5f1	Hand1	0.213019		Pou5f1	Hand1	0.286996
Pou5f1	Hdac2	0.029594		Pou5f1	Hdac2	0.0313191		Pou5f1	Hdac2	0.0215732		Pou5f1	Hdac2	0.0529428
Pou5f1	Hesx1	0.158854		Pou5f1	Hesx1	0.0209761		Pou5f1	Hesx1	0.0352159		Pou5f1	Hesx1	0.275864
Pou5f1	Hnf1a	0.097693		Pou5f1	Hnf1a	0.0611479		Pou5f1	Hnf1a	0.0454906		Pou5f1	Hnf1a	0.415157
Pou5f1	Hnf1b	0.0428243		Pou5f1	Hnf1b	0.0883163		Pou5f1	Hnf1b	0.0382987		Pou5f1	Hnf1b	0.140112
Pou5f1	Ifngr1	0.00768589		Pou5f1	Ifngr1	0.0590602		Pou5f1	Ifngr1	0.0456821		Pou5f1	Ifngr1	0.0966412
Pou5f1	Irs1	0.0560589		Pou5f1	Irs1	0.0761153		Pou5f1	Irs1	0.0608066		Pou5f1	Irs1	0.0872372
Pou5f1	Kdm3a	0.0231935		Pou5f1	Kdm3a	0.0883863		Pou5f1	Kdm3a	0.0505999		Pou5f1	Kdm3a	0.212936
Pou5f1	Kdm4c	0.0204415		Pou5f1	Kdm4c	0.242411		Pou5f1	Kdm4c	0.0683458		Pou5f1	Kdm4c	0.151249
Pou5f1	Klf2	0.116023		Pou5f1	Klf2	0.758217		Pou5f1	Klf2	0.251675		Pou5f1	Klf2	0.142658
Pou5f1	Klf4	0.349524		Pou5f1	Klf4	0.188881		Pou5f1	Klf4	0.125735		Pou5f1	Klf4	0.552
Pou5f1	Klf5	0.208044		Pou5f1	Klf5	0.0708382		Pou5f1	Klf5	0.228446		Pou5f1	Klf5	0.12923
Pou5f1	Lefty1	0.75722		Pou5f1	Lefty1	0.0787897		Pou5f1	Lefty1	0.079089		Pou5f1	Lefty1	0.122796
Pou5f1	Lefty2	0.212361		Pou5f1	Lefty2	0.605423		Pou5f1	Lefty2	0.640318		Pou5f1	Lefty2	0.0893841
Pou5f1	Lif	0.164271		Pou5f1	Lif	0.212525		Pou5f1	Lif	0.100611		Pou5f1	Lif	0.159948
Pou5f1	Lin28a	0.25153		Pou5f1	Lin28a	0.454832		Pou5f1	Lin28a	0.556436		Pou5f1	Lin28a	0.127521
Pou5f1	Mga	0.147431		Pou5f1	Mga	0.0593303		Pou5f1	Mga	0.0701035		Pou5f1	Mga	0.207666
Pou5f1	Mta1	0.0516695		Pou5f1	Mta1	0.0912194		Pou5f1	Mta1	0.076444		Pou5f1	Mta1	0.0593856
Pou5f1	Myc	0.0699926		Pou5f1	Myc	0.0763252		Pou5f1	Myc	0.0827447		Pou5f1	Myc	0.0722819
Pou5f1	Nacc1	0.0594754		Pou5f1	Nacc1	0.0677952		Pou5f1	Nacc1	0.0479256		Pou5f1	Nacc1	0.448343
Pou5f1	Nanog	0.195603		Pou5f1	Nanog	0.870458		Pou5f1	Nanog	0.719723		Pou5f1	Nanog	0.345179
Pou5f1	Nr0b1	0.456818		Pou5f1	Nr0b1	0.186776		Pou5f1	Nr0b1	0.100923		Pou5f1	Nr0b1	0.159014
Pou5f1	Nr5a2	0.032586		Pou5f1	Nr5a2	0.061136		Pou5f1	Nr5a2	0.0920671		Pou5f1	Nr5a2	0.174924
Pou5f1	Paf1	0.0423322		Pou5f1	Paf1	0.0523983		Pou5f1	Paf1	0.0462967		Pou5f1	Paf1	0.0506039
Pou5f1	Pcgf2	0.0335523		Pou5f1	Pcgf2	0.0182598		Pou5f1	Pcgf2	0.0190646		Pou5f1	Pcgf2	0.124292
Pou5f1	Pcgf6	0.935046		Pou5f1	Pcgf6	0.395795		Pou5f1	Pcgf6	0.447325		Pou5f1	Pcgf6	0.249907
Pou5f1	Pcid2	0.988296		Pou5f1	Pcid2	0.386529		Pou5f1	Pcid2	0.879312		Pou5f1	Pcid2	0.0811427
Pou5f1	Pdgfa	0.674173		Pou5f1	Pdgfa	0.32529		Pou5f1	Pdgfa	0.388613		Pou5f1	Pdgfa	0.15119
Pou5f1	Phc2	0.950518		Pou5f1	Phc2	0.869881		Pou5f1	Phc2	0.909974		Pou5f1	Phc2	0.434495
Pou5f1	Rest	0.674799		Pou5f1	Rest	0.060083		Pou5f1	Rest	0.0862022		Pou5f1	Rest	0.15475
Pou5f1	Rif1	0.095645		Pou5f1	Rif1	0.0578628		Pou5f1	Rif1	0.0423522		Pou5f1	Rif1	0.0645779
Pou5f1	Rnf2	0.722024		Pou5f1	Rnf2	0.152782		Pou5f1	Rnf2	0.395331		Pou5f1	Rnf2	0.379772
Pou5f1	Sall1	0.813764		Pou5f1	Sall1	0.194017		Pou5f1	Sall1	0.145063		Pou5f1	Sall1	0.32578
Pou5f1	Sall3	0.997254		Pou5f1	Sall3	0.330782		Pou5f1	Sall3	0.574648		Pou5f1	Sall3	0.558297
Pou5f1	Sall4	0.531653		Pou5f1	Sall4	0.110505		Pou5f1	Sall4	0.238636		Pou5f1	Sall4	0.197377
Pou5f1	Shh	0.117316		Pou5f1	Shh	0.220531		Pou5f1	Shh	0.166267		Pou5f1	Shh	0.09802
Pou5f1	Sin3a	0.0899062		Pou5f1	Sin3a	0.189627		Pou5f1	Sin3a	0.173411		Pou5f1	Sin3a	0.190697
Pou5f1	Skil	0.0130087		Pou5f1	Skil	0.152643		Pou5f1	Skil	0.110322		Pou5f1	Skil	0.0582903
Pou5f1	Slc2a3	0.328859		Pou5f1	Slc2a3	0.450727		Pou5f1	Slc2a3	0.47641		Pou5f1	Slc2a3	0.56958
Pou5f1	Smc1a	0.110804		Pou5f1	Smc1a	0.0705118		Pou5f1	Smc1a	0.0675478		Pou5f1	Smc1a	0.0941768
Pou5f1	Sox11	0.963359		Pou5f1	Sox11	0.340252		Pou5f1	Sox11	0.634016		Pou5f1	Sox11	0.399425
Pou5f1	Sox15	0.878038		Pou5f1	Sox15	0.70277		Pou5f1	Sox15	0.858465		Pou5f1	Sox15	0.287873
Pou5f1	Sox2	0.999964		Pou5f1	Sox2	0.977642		Pou5f1	Sox2	0.999485		Pou5f1	Sox2	0.374783
Pou5f1	Sp1	0.615835		Pou5f1	Sp1	0.0435521		Pou5f1	Sp1	0.0297416		Pou5f1	Sp1	0.0979188
Pou5f1	Spp1	0.987154		Pou5f1	Spp1	0.915048		Pou5f1	Spp1	0.995721		Pou5f1	Spp1	0.520047
Pou5f1	Stat3	0.171877		Pou5f1	Stat3	0.0966614		Pou5f1	Stat3	0.182571		Pou5f1	Stat3	0.0697489
Pou5f1	Sumo1	0.116182		Pou5f1	Sumo1	0.083065		Pou5f1	Sumo1	0.127214		Pou5f1	Sumo1	0.101484
Pou5f1	Tbx3	0.483035		Pou5f1	Tbx3	0.0408656		Pou5f1	Tbx3	0.157912		Pou5f1	Tbx3	0.170127
Pou5f1	Tcf3	0.900513		Pou5f1	Tcf3	0.123249		Pou5f1	Tcf3	0.107154		Pou5f1	Tcf3	0.295752
Pou5f1	Tcfcp2	0.999752		Pou5f1	Tcfcp2	0.931373		Pou5f1	Tcfcp2	0.992244		Pou5f1	Tcfcp2	0.41103
Pou5f1	Tcl1	0.923759		Pou5f1	Tcl1	0.886939		Pou5f1	Tcl1	0.95685		Pou5f1	Tcl1	0.0824967
Pou5f1	Trim28	0.729231		Pou5f1	Trim28	0.913985		Pou5f1	Trim28	0.910289		Pou5f1	Trim28	0.191782
Pou5f1	Ube2i	0.249954		Pou5f1	Ube2i	0.0644456		Pou5f1	Ube2i	0.0472589		Pou5f1	Ube2i	0.138587
Pou5f1	Utf1	0.99999		Pou5f1	Utf1	0.649142		Pou5f1	Utf1	0.601697		Pou5f1	Utf1	0.68996
Pou5f1	Wnt1	0.999929		Pou5f1	Wnt1	0.293177		Pou5f1	Wnt1	0.928516		Pou5f1	Wnt1	0.675843
Pou5f1	Wnt10b	0.619004		Pou5f1	Wnt10b	0.778043		Pou5f1	Wnt10b	0.916921		Pou5f1	Wnt10b	0.0961285
Pou5f1	Wnt11	0.996596		Pou5f1	Wnt11	0.871494		Pou5f1	Wnt11	0.984748		Pou5f1	Wnt11	0.268672
Pou5f1	Wnt16	0.235779		Pou5f1	Wnt16	0.126923		Pou5f1	Wnt16	0.127577		Pou5f1	Wnt16	0.113886
Pou5f1	Wnt2	0.0722696		Pou5f1	Wnt2	0.539569		Pou5f1	Wnt2	0.518413		Pou5f1	Wnt2	0.225439
Pou5f1	Wnt2b	0.999702		Pou5f1	Wnt2b	0.496826		Pou5f1	Wnt2b	0.913469		Pou5f1	Wnt2b	0.56429
Pou5f1	Wnt3	0.660512		Pou5f1	Wnt3	0.150203		Pou5f1	Wnt3	0.157435		Pou5f1	Wnt3	0.29953
Pou5f1	Wnt3a	0.896791		Pou5f1	Wnt3a	0.205802		Pou5f1	Wnt3a	0.302907		Pou5f1	Wnt3a	0.158995
Pou5f1	Wnt4	0.99606		Pou5f1	Wnt4	0.690232		Pou5f1	Wnt4	0.992634		Pou5f1	Wnt4	0.727545
Pou5f1	Wnt5a	1		Pou5f1	Wnt5a	0.998301		Pou5f1	Wnt5a	0.999949		Pou5f1	Wnt5a	0.849437
Pou5f1	Wnt5b	0.998339		Pou5f1	Wnt5b	0.451212		Pou5f1	Wnt5b	0.832238		Pou5f1	Wnt5b	0.849666
Pou5f1	Wnt6	0.999285		Pou5f1	Wnt6	0.310354		Pou5f1	Wnt6	0.559874		Pou5f1	Wnt6	0.69752
Pou5f1	Wnt7a	0.997332		Pou5f1	Wnt7a	0.891273		Pou5f1	Wnt7a	0.981347		Pou5f1	Wnt7a	0.414778
Pou5f1	Wnt7b	0.996545		Pou5f1	Wnt7b	0.593629		Pou5f1	Wnt7b	0.672911		Pou5f1	Wnt7b	0.541716
Pou5f1	Wnt9b	0.681154		Pou5f1	Wnt9b	0.0547649		Pou5f1	Wnt9b	0.0854154		Pou5f1	Wnt9b	0.0770348
Pou5f1	Xist	0.767111		Pou5f1	Xist	0.26916		Pou5f1	Xist	0.494875		Pou5f1	Xist	0.158007
Pou5f1	Zfp143	0.533994		Pou5f1	Zfp143	0.539714		Pou5f1	Zfp143	0.802299		Pou5f1	Zfp143	0.273549
Pou5f1	Zfp42	0.0964705		Pou5f1	Zfp42	0.157092		Pou5f1	Zfp42	0.17126		Pou5f1	Zfp42	0.225698
Pou5f1	Zfp57	0.772539		Pou5f1	Zfp57	0.446236		Pou5f1	Zfp57	0.355467		Pou5f1	Zfp57	0.11165
Pou5f1	Zic3	0.497279		Pou5f1	Zic3	0.407711		Pou5f1	Zic3	0.514232		Pou5f1	Zic3	0.0672422
Pou5f1	Zscan10	0.331921		Pou5f1	Zscan10	0.575115		Pou5f1	Zscan10	0.693101		Pou5f1	Zscan10	0.344201
Prkcc	Shh	0.207772		Prkcc	Shh	0.136794		Prkcc	Shh	0.156774		Prkcc	Shh	0.239892
Ptch1	Shh	0.999989		Ptch1	Shh	0.618447		Ptch1	Shh	0.943374		Ptch1	Shh	0.514936
Pten	Akt1	0.999999		Pten	Akt1	0.628667		Pten	Akt1	0.988797		Pten	Akt1	0.792233
Pten	Akt3	0.0084949		Pten	Akt3	0.0172526		Pten	Akt3	0.0259178		Pten	Akt3	0.222529
Pten	Pik3cd	0.0243498		Pten	Pik3cd	0.298956		Pten	Pik3cd	0.324686		Pten	Pik3cd	0.193319
Pten	Pik3r2	0.572885		Pten	Pik3r2	0.0723752		Pten	Pik3r2	0.144063		Pten	Pik3r2	0.159857
Pten	Sall4	0.0409478		Pten	Sall4	0.194865		Pten	Sall4	0.289242		Pten	Sall4	0.178152
Ptprr	Mapk1	0.45474		Ptprr	Mapk1	0.105772		Ptprr	Mapk1	0.15766		Ptprr	Mapk1	0.180611
Ptprr	Mapk3	0.0188854		Ptprr	Mapk3	0.286978		Ptprr	Mapk3	0.213725		Ptprr	Mapk3	0.222608
Pxmp3	Esrrb	0.0525844		Pxmp3	Esrrb	0.30957		Pxmp3	Esrrb	0.245492		Pxmp3	Esrrb	0.190449
Raf1	Fgf8	0.0132811		Raf1	Fgf8	0.0667635		Raf1	Fgf8	0.058946		Raf1	Fgf8	0.127566
Raf1	Ptpn11	0.479361		Raf1	Ptpn11	0.706284		Raf1	Ptpn11	0.791331		Raf1	Ptpn11	0.534561
Raf1	Sos1	0.637473		Raf1	Sos1	0.760609		Raf1	Sos1	0.783978		Raf1	Sos1	0.368121
Rela	Nanog	0.0527869		Rela	Nanog	0.155452		Rela	Nanog	0.217514		Rela	Nanog	0.452212
Relb	Nanog	0.163816		Relb	Nanog	0.0798712		Relb	Nanog	0.0682146		Relb	Nanog	0.326496
Rest	Myc	0.0640716		Rest	Myc	0.270435		Rest	Myc	0.264112		Rest	Myc	0.149745
Rest	Nanog	0.343036		Rest	Nanog	0.271737		Rest	Nanog	0.423777		Rest	Nanog	0.344732
Rest	Sox2	0.0185113		Rest	Sox2	0.0269768		Rest	Sox2	0.0186216		Rest	Sox2	0.0641316
Rest	Tbx3	0.00364311		Rest	Tbx3	0.287827		Rest	Tbx3	0.287142		Rest	Tbx3	0.203472
Rif1	Nanog	0.2127		Rif1	Nanog	0.380209		Rif1	Nanog	0.432213		Rif1	Nanog	0.306371
Rif1	Sox2	0.989444		Rif1	Sox2	0.66616		Rif1	Sox2	0.875983		Rif1	Sox2	0.43241
Ring1	Bmi1	1		Ring1	Bmi1	0.919567		Ring1	Bmi1	0.996605		Ring1	Bmi1	0.855511
Ring1	Yy1	0.999984		Ring1	Yy1	0.682484		Ring1	Yy1	0.949584		Ring1	Yy1	0.896168
Rnf2	Bmi1	0.628578		Rnf2	Bmi1	0.210777		Rnf2	Bmi1	0.430175		Rnf2	Bmi1	0.091378
Rnf2	H3f3b	0.141169		Rnf2	H3f3b	0.0281259		Rnf2	H3f3b	0.0547052		Rnf2	H3f3b	0.265971
Rnf2	Ring1	0.0122061		Rnf2	Ring1	0.00580696		Rnf2	Ring1	0.00441641		Rnf2	Ring1	0.154622
Rnf2	Yy1	0.62848		Rnf2	Yy1	0.604258		Rnf2	Yy1	0.245938		Rnf2	Yy1	0.102529
Rsph6a	Lif	0.999998		Rsph6a	Lif	0.862272		Rsph6a	Lif	0.949003		Rsph6a	Lif	0.148083
Sall1	Sall4	0.102236		Sall1	Sall4	0.230427		Sall1	Sall4	0.414553		Sall1	Sall4	0.217445
Sall3	Sall4	0.63452		Sall3	Sall4	0.0592226		Sall3	Sall4	0.0963967		Sall3	Sall4	0.0271773
Sall4	Sox2	0.0220537		Sall4	Sox2	0.0168167		Sall4	Sox2	0.0265522		Sall4	Sox2	0.0445368
Scmh1	Yy1	0.0303041		Scmh1	Yy1	0.328347		Scmh1	Yy1	0.0870338		Scmh1	Yy1	0.081799
Scml2	Yy1	0.0274181		Scml2	Yy1	0.0485343		Scml2	Yy1	0.0477429		Scml2	Yy1	0.146241
Sema3f	Esrrb	0.25263		Sema3f	Esrrb	0.52035		Sema3f	Esrrb	0.42376		Sema3f	Esrrb	0.120552
Sepp1	Egf	0.948207		Sepp1	Egf	0.0666704		Sepp1	Egf	0.426729		Sepp1	Egf	0.119529
Sepp1	Egfr	0.751447		Sepp1	Egfr	0.0203497		Sepp1	Egfr	0.0565786		Sepp1	Egfr	0.470719
Sepp1	Fgf1	0.904977		Sepp1	Fgf1	0.253857		Sepp1	Fgf1	0.208722		Sepp1	Fgf1	0.133624
Sepp1	Fgf2	0.0707763		Sepp1	Fgf2	0.176044		Sepp1	Fgf2	0.0526295		Sepp1	Fgf2	0.05589
Sepp1	Fgf3	0.299094		Sepp1	Fgf3	0.291828		Sepp1	Fgf3	0.201117		Sepp1	Fgf3	0.353152
Sepp1	Fgf4	0.124299		Sepp1	Fgf4	0.0302976		Sepp1	Fgf4	0.0138428		Sepp1	Fgf4	0.007531
Sepp1	Fgf5	0.57803		Sepp1	Fgf5	0.0828009		Sepp1	Fgf5	0.0811669		Sepp1	Fgf5	0.135823
Sepp1	Fgf6	0.309117		Sepp1	Fgf6	0.826186		Sepp1	Fgf6	0.715331		Sepp1	Fgf6	0.0832966
Sepp1	Fgf7	0.28855		Sepp1	Fgf7	0.470014		Sepp1	Fgf7	0.507793		Sepp1	Fgf7	0.0704012
Sepp1	Fgf8	0.0758322		Sepp1	Fgf8	0.0718172		Sepp1	Fgf8	0.0883777		Sepp1	Fgf8	0.127873
Sepp1	Fgfr1	0.594897		Sepp1	Fgfr1	0.420113		Sepp1	Fgfr1	0.406378		Sepp1	Fgfr1	0.278538
Sepp1	Fgfr2	0.0661176		Sepp1	Fgfr2	0.0940562		Sepp1	Fgfr2	0.109098		Sepp1	Fgfr2	0.0349616
Sepp1	Fgfr3	0.125002		Sepp1	Fgfr3	0.0781122		Sepp1	Fgfr3	0.0962167		Sepp1	Fgfr3	0.054695
Sepp1	Fgfr4	0.621458		Sepp1	Fgfr4	0.0110904		Sepp1	Fgfr4	0.0119743		Sepp1	Fgfr4	0.0380216
Sepp1	Lif	0.136683		Sepp1	Lif	0.20387		Sepp1	Lif	0.203366		Sepp1	Lif	0.138006
Sepp1	Lifr	0.0742201		Sepp1	Lifr	0.038379		Sepp1	Lifr	0.0719179		Sepp1	Lifr	0.0806916
Sepp1	Ptpn11	0.580785		Sepp1	Ptpn11	0.367755		Sepp1	Ptpn11	0.133216		Sepp1	Ptpn11	0.411455
Sepp1	Raf1	0.751109		Sepp1	Raf1	0.867113		Sepp1	Raf1	0.711411		Sepp1	Raf1	0.260921
Sepp1	Sos1	0.576531		Sepp1	Sos1	0.534913		Sepp1	Sos1	0.30813		Sepp1	Sos1	0.217828
Sf1	Nr5a2	0.0877255		Sf1	Nr5a2	0.258836		Sf1	Nr5a2	0.0525931		Sf1	Nr5a2	0.0683065
Shh	Sox2	0.0214506		Shh	Sox2	0.505802		Shh	Sox2	0.119591		Shh	Sox2	0.198645
Shh	Wnt1	0.531167		Shh	Wnt1	0.472519		Shh	Wnt1	0.718958		Shh	Wnt1	0.229207
Sin3a	Nanog	0.618271		Sin3a	Nanog	0.207019		Sin3a	Nanog	0.0787421		Sin3a	Nanog	0.129922
Sin3a	Thap11	0.0381046		Sin3a	Thap11	0.0246072		Sin3a	Thap11	0.103232		Sin3a	Thap11	0.230435
Skil	Nanog	0.392761		Skil	Nanog	0.472205		Skil	Nanog	0.370965		Skil	Nanog	0.266967
Skil	Sox2	0.597793		Skil	Sox2	0.483703		Skil	Sox2	0.608529		Skil	Sox2	0.23242
Smad1	Actr2	0.346177		Smad1	Actr2	0.0989961		Smad1	Actr2	0.21284		Smad1	Actr2	0.267365
Smad1	Acvr1	0.88466		Smad1	Acvr1	0.266482		Smad1	Acvr1	0.514909		Smad1	Acvr1	0.0475568
Smad1	Acvr2b	0.998934		Smad1	Acvr2b	0.448713		Smad1	Acvr2b	0.606759		Smad1	Acvr2b	0.747334
Smad1	Bmp4	0.375236		Smad1	Bmp4	0.488563		Smad1	Bmp4	0.2909		Smad1	Bmp4	0.0589723
Smad1	Bmpr1a	0.524688		Smad1	Bmpr1a	0.104133		Smad1	Bmpr1a	0.24731		Smad1	Bmpr1a	0.131317
Smad1	Bmpr2	0.446545		Smad1	Bmpr2	0.142115		Smad1	Bmpr2	0.0978962		Smad1	Bmpr2	0.0700517
Smad1	Ep300	0.944688		Smad1	Ep300	0.141556		Smad1	Ep300	0.248752		Smad1	Ep300	0.073113
Smad1	Ephb1	0.978563		Smad1	Ephb1	0.41376		Smad1	Ephb1	0.105415		Smad1	Ephb1	0.128955
Smad1	Esrrb	0.98287		Smad1	Esrrb	0.71394		Smad1	Esrrb	0.61931		Smad1	Esrrb	0.153893
Smad1	Fos	0.0589661		Smad1	Fos	0.0619161		Smad1	Fos	0.124689		Smad1	Fos	0.0731598
Smad1	Id1	0.021768		Smad1	Id1	0.0443808		Smad1	Id1	0.0305206		Smad1	Id1	0.0937234
Smad1	Jun	0.0627515		Smad1	Jun	0.616042		Smad1	Jun	0.434166		Smad1	Jun	0.0589285
Smad1	Klf4	0.0334076		Smad1	Klf4	0.113759		Smad1	Klf4	0.145953		Smad1	Klf4	0.208618
Smad1	Mapk1	0.0102006		Smad1	Mapk1	0.220295		Smad1	Mapk1	0.254046		Smad1	Mapk1	0.135013
Smad1	Mapk12	0.0232065		Smad1	Mapk12	0.550025		Smad1	Mapk12	0.483932		Smad1	Mapk12	0.0712681
Smad1	Mapk4	0.013197		Smad1	Mapk4	0.265648		Smad1	Mapk4	0.40814		Smad1	Mapk4	0.227394
Smad1	Mapk6	0.00556849		Smad1	Mapk6	0.132585		Smad1	Mapk6	0.164931		Smad1	Mapk6	0.111854
Smad1	Mapk7	0.0312129		Smad1	Mapk7	0.192675		Smad1	Mapk7	0.249849		Smad1	Mapk7	0.108853
Smad1	Nanog	0.0468125		Smad1	Nanog	0.107446		Smad1	Nanog	0.158014		Smad1	Nanog	0.436223
Smad1	Polr2j	0.0226024		Smad1	Polr2j	0.123812		Smad1	Polr2j	0.0702473		Smad1	Polr2j	0.146133
Smad1	Smad4	0.0169367		Smad1	Smad4	0.134602		Smad1	Smad4	0.308173		Smad1	Smad4	0.187021
Smad1	Smad5	0.0410011		Smad1	Smad5	0.169883		Smad1	Smad5	0.501795		Smad1	Smad5	0.347089
Smad1	Smad6	0.0392662		Smad1	Smad6	0.416765		Smad1	Smad6	0.338634		Smad1	Smad6	0.062229
Smad1	Smad7	0.0854949		Smad1	Smad7	0.0802248		Smad1	Smad7	0.199954		Smad1	Smad7	0.0950065
Smad1	Smad9	0.0090438		Smad1	Smad9	0.0570861		Smad1	Smad9	0.052814		Smad1	Smad9	0.141123
Smad1	Sox2	0.0171721		Smad1	Sox2	0.199207		Smad1	Sox2	0.272631		Smad1	Sox2	0.22947
Smad1	Zfp281	0.0357056		Smad1	Zfp281	0.460578		Smad1	Zfp281	0.497349		Smad1	Zfp281	0.285965
Smad4	Fos	0.0377463		Smad4	Fos	0.08937		Smad4	Fos	0.179705		Smad4	Fos	0.0907509
Smad4	Id1	0.109047		Smad4	Id1	0.175088		Smad4	Id1	0.203708		Smad4	Id1	0.125558
Smad4	Jun	0.0125514		Smad4	Jun	0.0663093		Smad4	Jun	0.0435686		Smad4	Jun	0.129496
Smad4	Sox2	0.0645226		Smad4	Sox2	0.0206843		Smad4	Sox2	0.0316962		Smad4	Sox2	0.286559
Smad5	Actr2	0.110204		Smad5	Actr2	0.0616939		Smad5	Actr2	0.0483428		Smad5	Actr2	0.273529
Smad5	Acvr1	0.169824		Smad5	Acvr1	0.0584696		Smad5	Acvr1	0.0259761		Smad5	Acvr1	0.102302
Smad5	Acvr2b	0.104266		Smad5	Acvr2b	0.0906174		Smad5	Acvr2b	0.0494294		Smad5	Acvr2b	0.184934
Smad5	Bmp4	0.0192035		Smad5	Bmp4	0.0096978		Smad5	Bmp4	0.00520874		Smad5	Bmp4	0.134596
Smad5	Bmpr1a	0.0344208		Smad5	Bmpr1a	0.0212837		Smad5	Bmpr1a	0.0734835		Smad5	Bmpr1a	0.163338
Smad5	Esrrb	0.0108983		Smad5	Esrrb	0.0415819		Smad5	Esrrb	0.0579278		Smad5	Esrrb	0.0932388
Smad5	Fos	0.0455172		Smad5	Fos	0.0266169		Smad5	Fos	0.0750856		Smad5	Fos	0.317311
Smad5	Id1	0.0158442		Smad5	Id1	0.227512		Smad5	Id1	0.0336857		Smad5	Id1	0.0993527
Smad5	Jun	0.047303		Smad5	Jun	0.0909973		Smad5	Jun	0.125232		Smad5	Jun	0.0449192
Smad5	Klf4	0.182588		Smad5	Klf4	0.389891		Smad5	Klf4	0.303657		Smad5	Klf4	0.264592
Smad5	Mapk1	0.0143958		Smad5	Mapk1	0.477764		Smad5	Mapk1	0.363701		Smad5	Mapk1	0.0376249
Smad5	Mapk12	0.0119162		Smad5	Mapk12	0.140303		Smad5	Mapk12	0.217839		Smad5	Mapk12	0.197409
Smad5	Mapk4	0.0264693		Smad5	Mapk4	0.268099		Smad5	Mapk4	0.475575		Smad5	Mapk4	0.0888138
Smad5	Mapk6	0.016213		Smad5	Mapk6	0.159922		Smad5	Mapk6	0.0916358		Smad5	Mapk6	0.0809171
Smad5	Mapk7	0.0207121		Smad5	Mapk7	0.311595		Smad5	Mapk7	0.326971		Smad5	Mapk7	0.206477
Smad5	Nanog	0.0293214		Smad5	Nanog	0.0736685		Smad5	Nanog	0.0305489		Smad5	Nanog	0.0354204
Smad5	Smad4	0.0326069		Smad5	Smad4	0.10943		Smad5	Smad4	0.215343		Smad5	Smad4	0.0559034
Smad5	Smad6	0.0429485		Smad5	Smad6	0.145095		Smad5	Smad6	0.261991		Smad5	Smad6	0.0536031
Smad5	Smad9	0.0158706		Smad5	Smad9	0.432014		Smad5	Smad9	0.404635		Smad5	Smad9	0.0931301
Smad5	Sox2	0.0624386		Smad5	Sox2	0.0541926		Smad5	Sox2	0.0434075		Smad5	Sox2	0.0318065
Smad5	Zfp281	0.033196		Smad5	Zfp281	0.11107		Smad5	Zfp281	0.200066		Smad5	Zfp281	0.0358819
Smad6	Id1	0.0365961		Smad6	Id1	0.379997		Smad6	Id1	0.392997		Smad6	Id1	0.125995
Smad6	Smad4	0.25132		Smad6	Smad4	0.0908441		Smad6	Smad4	0.0685826		Smad6	Smad4	0.0390331
Smad6	Smad9	0.163036		Smad6	Smad9	0.0376106		Smad6	Smad9	0.117758		Smad6	Smad9	0.0660887
Smad7	Smad4	0.0970382		Smad7	Smad4	0.280298		Smad7	Smad4	0.29374		Smad7	Smad4	0.0872292
Smad7	Smad5	0.130057		Smad7	Smad5	0.0597602		Smad7	Smad5	0.241623		Smad7	Smad5	0.222006
Smad7	Smad9	0.953108		Smad7	Smad9	0.114897		Smad7	Smad9	0.394982		Smad7	Smad9	0.286274
Smad9	Actr2	0.0959335		Smad9	Actr2	0.23283		Smad9	Actr2	0.161278		Smad9	Actr2	0.0681595
Smad9	Acvr1	0.087713		Smad9	Acvr1	0.198616		Smad9	Acvr1	0.141213		Smad9	Acvr1	0.272456
Smad9	Acvr2b	0.0685606		Smad9	Acvr2b	0.0175809		Smad9	Acvr2b	0.0488151		Smad9	Acvr2b	0.18722
Smad9	Bmp4	0.640539		Smad9	Bmp4	0.153962		Smad9	Bmp4	0.167614		Smad9	Bmp4	0.396079
Smad9	Fos	0.0333903		Smad9	Fos	0.0572661		Smad9	Fos	0.0664475		Smad9	Fos	0.271065
Smad9	Jun	0.193811		Smad9	Jun	0.339633		Smad9	Jun	0.512422		Smad9	Jun	0.442343
Smad9	Mapk4	0.0650027		Smad9	Mapk4	0.0695677		Smad9	Mapk4	0.0661843		Smad9	Mapk4	0.0406221
Smad9	Nanog	0.183963		Smad9	Nanog	0.0305438		Smad9	Nanog	0.206222		Smad9	Nanog	0.0372275
Smad9	Smad4	0.307129		Smad9	Smad4	0.118157		Smad9	Smad4	0.291708		Smad9	Smad4	0.123307
Smad9	Sox2	0.511869		Smad9	Sox2	0.178265		Smad9	Sox2	0.149884		Smad9	Sox2	0.205477
Smad9	Zfp281	0.191881		Smad9	Zfp281	0.0977319		Smad9	Zfp281	0.0465837		Smad9	Zfp281	0.127063
Smc1a	Nanog	0.0119746		Smc1a	Nanog	0.135315		Smc1a	Nanog	0.179247		Smc1a	Nanog	0.0585324
Smc1a	Sox2	0.111044		Smc1a	Sox2	0.0518486		Smc1a	Sox2	0.0654654		Smc1a	Sox2	0.0279564
Smo	Ccnd1	0.302262		Smo	Ccnd1	0.0824438		Smo	Ccnd1	0.106496		Smo	Ccnd1	0.131221
Smo	Ccne1	0.068113		Smo	Ccne1	0.45345		Smo	Ccne1	0.761608		Smo	Ccne1	0.0728322
Smo	Cdk4	0.0172277		Smo	Cdk4	0.189231		Smo	Cdk4	0.124741		Smo	Cdk4	0.0724355
Smo	Gli1	0.0463475		Smo	Gli1	0.443692		Smo	Gli1	0.252389		Smo	Gli1	0.0862832
Smo	Nkap	0.366888		Smo	Nkap	0.160908		Smo	Nkap	0.122468		Smo	Nkap	0.202634
Smo	Prkcc	0.0586054		Smo	Prkcc	0.0185827		Smo	Prkcc	0.0244712		Smo	Prkcc	0.0898712
Smo	Shh	0.0394279		Smo	Shh	0.116278		Smo	Shh	0.155138		Smo	Shh	0.0784579
Sos1	Fgf8	0.0212619		Sos1	Fgf8	0.134113		Sos1	Fgf8	0.155692		Sos1	Fgf8	0.0316108
Sos1	Ptpn11	0.209226		Sos1	Ptpn11	0.10576		Sos1	Ptpn11	0.256356		Sos1	Ptpn11	0.237929
Sox2	Hnf1a	0.444449		Sox2	Hnf1a	0.646393		Sox2	Hnf1a	0.443458		Sox2	Hnf1a	0.0967235
Sox2	Hnf1b	0.350746		Sox2	Hnf1b	0.372205		Sox2	Hnf1b	0.214374		Sox2	Hnf1b	0.102574
Sox2	Pcgf2	0.193665		Sox2	Pcgf2	0.243707		Sox2	Pcgf2	0.255687		Sox2	Pcgf2	0.0568016
Sox2	Tbx3	0.221569		Sox2	Tbx3	0.155729		Sox2	Tbx3	0.367573		Sox2	Tbx3	0.098589
Sox2	Tcf3	0.01046		Sox2	Tcf3	0.201654		Sox2	Tcf3	0.120033		Sox2	Tcf3	0.118364
Sox2	Wnt1	0.093282		Sox2	Wnt1	0.095504		Sox2	Wnt1	0.147329		Sox2	Wnt1	0.12896
Sox2	Wnt2	0.0864668		Sox2	Wnt2	0.337206		Sox2	Wnt2	0.128248		Sox2	Wnt2	0.169329
Sox2	Wnt3	0.1017		Sox2	Wnt3	0.235732		Sox2	Wnt3	0.161364		Sox2	Wnt3	0.13856
Sox2	Wnt3a	0.1356		Sox2	Wnt3a	0.398436		Sox2	Wnt3a	0.192374		Sox2	Wnt3a	0.140458
Sox2	Wnt4	0.0197721		Sox2	Wnt4	0.296258		Sox2	Wnt4	0.2115		Sox2	Wnt4	0.118956
Sox2	Wnt5a	0.00765144		Sox2	Wnt5a	0.10536		Sox2	Wnt5a	0.142302		Sox2	Wnt5a	0.0809395
Sox2	Wnt5b	0.462388		Sox2	Wnt5b	0.103409		Sox2	Wnt5b	0.364271		Sox2	Wnt5b	0.247533
Sox2	Wnt6	0.0251913		Sox2	Wnt6	0.27492		Sox2	Wnt6	0.180673		Sox2	Wnt6	0.152177
Sox2	Wnt7a	0.0907928		Sox2	Wnt7a	0.107806		Sox2	Wnt7a	0.044496		Sox2	Wnt7a	0.090088
Sox2	Wnt7b	0.0170146		Sox2	Wnt7b	0.0249136		Sox2	Wnt7b	0.051252		Sox2	Wnt7b	0.0937877
Sox2	Xist	0.0961076		Sox2	Xist	0.288562		Sox2	Xist	0.170028		Sox2	Xist	0.128412
Sox2	Yy1	0.110348		Sox2	Yy1	0.235847		Sox2	Yy1	0.259074		Sox2	Yy1	0.26287
Sox2	Zfp42	0.0187208		Sox2	Zfp42	0.140267		Sox2	Zfp42	0.0747653		Sox2	Zfp42	0.158237
St6galnac4	Esrrb	0.0844677		St6galnac4	Esrrb	0.153342		St6galnac4	Esrrb	0.0857721		St6galnac4	Esrrb	0.149873
Stat3	Aes	0.0246886		Stat3	Aes	0.0269041		Stat3	Aes	0.0780585		Stat3	Aes	0.147684
Stat3	Bcr	0.0693113		Stat3	Bcr	0.194888		Stat3	Bcr	0.204201		Stat3	Bcr	0.11971
Stat3	Ccne1	0.0790785		Stat3	Ccne1	0.0778543		Stat3	Ccne1	0.127387		Stat3	Ccne1	0.125382
Stat3	Cd9	0.00828256		Stat3	Cd9	0.0181998		Stat3	Cd9	0.0251567		Stat3	Cd9	0.13942
Stat3	Cdc25a	0.0621558		Stat3	Cdc25a	0.0714871		Stat3	Cdc25a	0.134269		Stat3	Cdc25a	0.106021
Stat3	Cdk2	0.0653101		Stat3	Cdk2	0.132335		Stat3	Cdk2	0.166835		Stat3	Cdk2	0.311169
Stat3	Eed	0.00861881		Stat3	Eed	0.168245		Stat3	Eed	0.200258		Stat3	Eed	0.197924
Stat3	Ep300	0.178273		Stat3	Ep300	0.499543		Stat3	Ep300	0.659045		Stat3	Ep300	0.203948
Stat3	Esrrb	0.0438949		Stat3	Esrrb	0.25858		Stat3	Esrrb	0.387615		Stat3	Esrrb	0.132475
Stat3	Gabpa	0.0419443		Stat3	Gabpa	0.271097		Stat3	Gabpa	0.300107		Stat3	Gabpa	0.0258872
Stat3	Hif1a	0.0963196		Stat3	Hif1a	0.083557		Stat3	Hif1a	0.102397		Stat3	Hif1a	0.11421
Stat3	Hspa1b	0.0121006		Stat3	Hspa1b	0.212069		Stat3	Hspa1b	0.0739642		Stat3	Hspa1b	0.0801613
Stat3	Id1	0.0666166		Stat3	Id1	0.040033		Stat3	Id1	0.0835546		Stat3	Id1	0.116003
Stat3	Id2	0.00742865		Stat3	Id2	0.0404983		Stat3	Id2	0.121264		Stat3	Id2	0.385996
Stat3	Il6st	0.00690434		Stat3	Il6st	0.0597258		Stat3	Il6st	0.0672915		Stat3	Il6st	0.141139
Stat3	Inhbb	0.0212081		Stat3	Inhbb	0.635311		Stat3	Inhbb	0.115049		Stat3	Inhbb	0.156202
Stat3	Jak1	0.0516271		Stat3	Jak1	0.0591397		Stat3	Jak1	0.072034		Stat3	Jak1	0.0900014
Stat3	Kdm3a	0.0242191		Stat3	Kdm3a	0.292802		Stat3	Kdm3a	0.0673963		Stat3	Kdm3a	0.0880717
Stat3	Klf4	0.145565		Stat3	Klf4	0.653721		Stat3	Klf4	0.394498		Stat3	Klf4	0.371455
Stat3	Klf5	0.170242		Stat3	Klf5	0.543242		Stat3	Klf5	0.170967		Stat3	Klf5	0.154864
Stat3	Lefty1	0.157528		Stat3	Lefty1	0.17082		Stat3	Lefty1	0.303867		Stat3	Lefty1	0.0367049
Stat3	Lif	0.448124		Stat3	Lif	0.51418		Stat3	Lif	0.637706		Stat3	Lif	0.49846
Stat3	Lifr	0.0182543		Stat3	Lifr	0.356739		Stat3	Lifr	0.412751		Stat3	Lifr	0.259114
Stat3	Myc	0.295222		Stat3	Myc	0.628507		Stat3	Myc	0.703551		Stat3	Myc	0.263808
Stat3	Nanog	0.99918		Stat3	Nanog	0.434345		Stat3	Nanog	0.724278		Stat3	Nanog	0.747169
Stat3	Pim1	0.458214		Stat3	Pim1	0.489615		Stat3	Pim1	0.382202		Stat3	Pim1	0.0632546
Stat3	Pim3	0.193428		Stat3	Pim3	0.257588		Stat3	Pim3	0.251059		Stat3	Pim3	0.110856
Stat3	Polr2j	0.204762		Stat3	Polr2j	0.0540964		Stat3	Polr2j	0.123252		Stat3	Polr2j	0.0520747
Stat3	Smad1	0.923902		Stat3	Smad1	0.667588		Stat3	Smad1	0.930301		Stat3	Smad1	0.384773
Stat3	Smad4	0.084815		Stat3	Smad4	0.296822		Stat3	Smad4	0.555339		Stat3	Smad4	0.170783
Stat3	Smad5	0.39246		Stat3	Smad5	0.656816		Stat3	Smad5	0.882045		Stat3	Smad5	0.56129
Stat3	Smad9	0.728265		Stat3	Smad9	0.112058		Stat3	Smad9	0.427094		Stat3	Smad9	0.123717
Stat3	Sox2	0.417262		Stat3	Sox2	0.719068		Stat3	Sox2	0.958768		Stat3	Sox2	0.207916
Stat3	T	0.3406		Stat3	T	0.0893878		Stat3	T	0.361786		Stat3	T	0.127526
Stat3	Zfp281	0.810233		Stat3	Zfp281	0.705413		Stat3	Zfp281	0.926252		Stat3	Zfp281	0.549733
Stat3	Zfp57	0.324857		Stat3	Zfp57	0.312658		Stat3	Zfp57	0.42381		Stat3	Zfp57	0.0305675
Suz12	Eed	0.086525		Suz12	Eed	0.0734523		Suz12	Eed	0.137512		Suz12	Eed	0.0489657
Suz12	Zfp42	0.736122		Suz12	Zfp42	0.597116		Suz12	Zfp42	0.383396		Suz12	Zfp42	0.128499
Tbx3	Tcf3	0.0908533		Tbx3	Tcf3	0.424291		Tbx3	Tcf3	0.36662		Tbx3	Tcf3	0.14957
Tcl1	Kdm3a	0.433534		Tcl1	Kdm3a	0.302142		Tcl1	Kdm3a	0.642238		Tcl1	Kdm3a	0.108931
Tcl1	Kdm4c	0.532516		Tcl1	Kdm4c	0.50491		Tcl1	Kdm4c	0.615295		Tcl1	Kdm4c	0.458746
Tcl1	Nanog	0.986874		Tcl1	Nanog	0.904077		Tcl1	Nanog	0.94294		Tcl1	Nanog	0.180928
Tcl1	Tcf3	0.240312		Tcl1	Tcf3	0.332436		Tcl1	Tcf3	0.127676		Tcl1	Tcf3	0.337263
Tead4	Cdx2	0.199518		Tead4	Cdx2	0.394442		Tead4	Cdx2	0.31019		Tead4	Cdx2	0.0753256
Tead4	Eomes	0.17959		Tead4	Eomes	0.289717		Tead4	Eomes	0.40378		Tead4	Eomes	0.252261
Tert	Myc	0.0424938		Tert	Myc	0.522869		Tert	Myc	0.483195		Tert	Myc	0.0552162
Tet1	Cdx2	0.132656		Tet1	Cdx2	0.761307		Tet1	Cdx2	0.90646		Tet1	Cdx2	0.14121
Tet1	Gata4	0.118333		Tet1	Gata4	0.675469		Tet1	Gata4	0.477969		Tet1	Gata4	0.123031
Tet1	Nanog	0.496088		Tet1	Nanog	0.302561		Tet1	Nanog	0.866002		Tet1	Nanog	0.231175
Thap11	Cdx2	0.477072		Thap11	Cdx2	0.43881		Thap11	Cdx2	0.405391		Thap11	Cdx2	0.204224
Thap11	Gata4	0.440385		Thap11	Gata4	0.849301		Thap11	Gata4	0.900749		Thap11	Gata4	0.124086
Thap7	Thap11	0.563571		Thap7	Thap11	0.42425		Thap7	Thap11	0.430833		Thap7	Thap11	0.107662
Trim28	Nanog	0.011366		Trim28	Nanog	0.0598195		Trim28	Nanog	0.0974531		Trim28	Nanog	0.217956
Trim28	Sox2	0.059063		Trim28	Sox2	0.160982		Trim28	Sox2	0.354415		Trim28	Sox2	0.196882
Trpc3	Esrrb	0.0276554		Trpc3	Esrrb	0.160602		Trpc3	Esrrb	0.209736		Trpc3	Esrrb	0.0899424
Utf1	Sox15	0.0250466		Utf1	Sox15	0.141566		Utf1	Sox15	0.19762		Utf1	Sox15	0.221337
Utf1	Sox2	0.187957		Utf1	Sox2	0.265285		Utf1	Sox2	0.240258		Utf1	Sox2	0.279956
Vegfa	Arnt	0.0830897		Vegfa	Arnt	0.0583548		Vegfa	Arnt	0.114966		Vegfa	Arnt	0.0407782
Vegfa	Hif1a	0.0301601		Vegfa	Hif1a	0.0468575		Vegfa	Hif1a	0.0212583		Vegfa	Hif1a	0.0373176
Vhl	Hif1a	0.0105289		Vhl	Hif1a	0.0700429		Vhl	Hif1a	0.0501104		Vhl	Hif1a	0.0903215
Wnt1	Zfp42	0.0163828		Wnt1	Zfp42	0.0910667		Wnt1	Zfp42	0.25264		Wnt1	Zfp42	0.145701
Wnt10a	Axin1	0.0644174		Wnt10a	Axin1	0.0908744		Wnt10a	Axin1	0.156982		Wnt10a	Axin1	0.279802
Wnt10a	Dvl1	0.126787		Wnt10a	Dvl1	0.822503		Wnt10a	Dvl1	0.801139		Wnt10a	Dvl1	0.46584
Wnt10a	Dvl3	0.0224719		Wnt10a	Dvl3	0.0962479		Wnt10a	Dvl3	0.308481		Wnt10a	Dvl3	0.14722
Wnt10a	Fzd1	0.00490462		Wnt10a	Fzd1	0.287565		Wnt10a	Fzd1	0.306328		Wnt10a	Fzd1	0.169777
Wnt10a	Fzd2	0.112877		Wnt10a	Fzd2	0.0870634		Wnt10a	Fzd2	0.198311		Wnt10a	Fzd2	0.145593
Wnt10a	Fzd3	0.0767865		Wnt10a	Fzd3	0.128353		Wnt10a	Fzd3	0.386053		Wnt10a	Fzd3	0.436844
Wnt10a	Fzd4	0.0834902		Wnt10a	Fzd4	0.0593598		Wnt10a	Fzd4	0.0604453		Wnt10a	Fzd4	0.0837679
Wnt10a	Fzd5	0.171273		Wnt10a	Fzd5	0.160661		Wnt10a	Fzd5	0.201985		Wnt10a	Fzd5	0.178041
Wnt10a	Fzd6	0.0160967		Wnt10a	Fzd6	0.102481		Wnt10a	Fzd6	0.126868		Wnt10a	Fzd6	0.053157
Wnt10a	Fzd7	0.0566357		Wnt10a	Fzd7	0.900199		Wnt10a	Fzd7	0.552879		Wnt10a	Fzd7	0.112424
Wnt10a	Fzd8	0.0836146		Wnt10a	Fzd8	0.221715		Wnt10a	Fzd8	0.127168		Wnt10a	Fzd8	0.0844425
Wnt10a	Fzd9	0.0846404		Wnt10a	Fzd9	0.115602		Wnt10a	Fzd9	0.146393		Wnt10a	Fzd9	0.111543
Wnt10a	Gsk3b	0.0106217		Wnt10a	Gsk3b	0.185333		Wnt10a	Gsk3b	0.350807		Wnt10a	Gsk3b	0.150661
Wnt10b	Axin1	0.0145284		Wnt10b	Axin1	0.241314		Wnt10b	Axin1	0.272943		Wnt10b	Axin1	0.205899
Wnt10b	Dvl1	0.0123423		Wnt10b	Dvl1	0.228922		Wnt10b	Dvl1	0.128868		Wnt10b	Dvl1	0.11912
Wnt10b	Dvl3	0.0407996		Wnt10b	Dvl3	0.459674		Wnt10b	Dvl3	0.490682		Wnt10b	Dvl3	0.198897
Wnt10b	Fzd1	0.151856		Wnt10b	Fzd1	0.190599		Wnt10b	Fzd1	0.22631		Wnt10b	Fzd1	0.241401
Wnt10b	Fzd2	0.223442		Wnt10b	Fzd2	0.403895		Wnt10b	Fzd2	0.470676		Wnt10b	Fzd2	0.411845
Wnt10b	Fzd3	0.364725		Wnt10b	Fzd3	0.249284		Wnt10b	Fzd3	0.2224		Wnt10b	Fzd3	0.0387171
Wnt10b	Fzd4	0.110765		Wnt10b	Fzd4	0.10879		Wnt10b	Fzd4	0.248895		Wnt10b	Fzd4	0.406954
Wnt10b	Fzd5	0.0461888		Wnt10b	Fzd5	0.113877		Wnt10b	Fzd5	0.214887		Wnt10b	Fzd5	0.247689
Wnt10b	Fzd6	0.0171033		Wnt10b	Fzd6	0.532059		Wnt10b	Fzd6	0.613868		Wnt10b	Fzd6	0.326458
Wnt10b	Fzd7	0.0714977		Wnt10b	Fzd7	0.125857		Wnt10b	Fzd7	0.425377		Wnt10b	Fzd7	0.164094
Wnt10b	Fzd8	0.378915		Wnt10b	Fzd8	0.125459		Wnt10b	Fzd8	0.336963		Wnt10b	Fzd8	0.0452188
Wnt10b	Fzd9	0.0755547		Wnt10b	Fzd9	0.752745		Wnt10b	Fzd9	0.574875		Wnt10b	Fzd9	0.11198
[truncated: 59 more rows]
